# Supplementary material
Source: PubMed Central journal article supplement (PMC5038335)
Supplement: AAC.00477-16_zac010165548so1.pdf [file AAC.00477-16_zac010165548so1.pdf]

## **Supplemental Material.**

Supplemental Table 1. Information for *Acinetobacter* isolates analyzed in this study.

Supplemental Table 2. Centroids unique to major phylogroups

Supplemental Table 3a. Centroids found at greater frequency in isolates pre-2009

Supplemental Table 3b. Centroids found in greater frequency in isolates post-2009

Supplemental Table 4. Centroids found at greater frequency in sputum isolates and perirectal isolates

Supplemental Table 5. Listing of centroids unique to carbapenem resistant and sensitive groups

Supplemental Table 6. Centroids unique to perirectal sensitive and perirectal resistant genomes

Supplemental Table 7. Centroids found in greater frequency in carbapenem resistant isolates

Supplemental Table 8. Centroids found in greater frequency in carbapenem sensitive isolates

Supplemental Table 9. Centroids found in greater frequency in perirectal carbapenem resistant genomes

Supplemental Table 10. Centroids found in greater frequency in perirectal carbapenem sensitive genomes

Supplemental Table 11. Centroids found in greater frequency in sputum carbapenem resistant genomes

Supplemental Table 12. Centroids found in greater frequency in sputum carbapenem sensitive genomes

Supplemental Table 13. Centroids unique to clusters

Supplemental Table 14. Distribution of OXA genes in sequenced isolates

Supplemental Datafile 1. LS-BSR matrix for analysis of all *A. baumannii* isolates. This matrix contains Blast Score Ratio values for all *A. baumannii* genomes newly sequenced for this study.

Supplemental Datafile 2. Multifasta file of all centroid sequences.

# Supplemental Figure 1

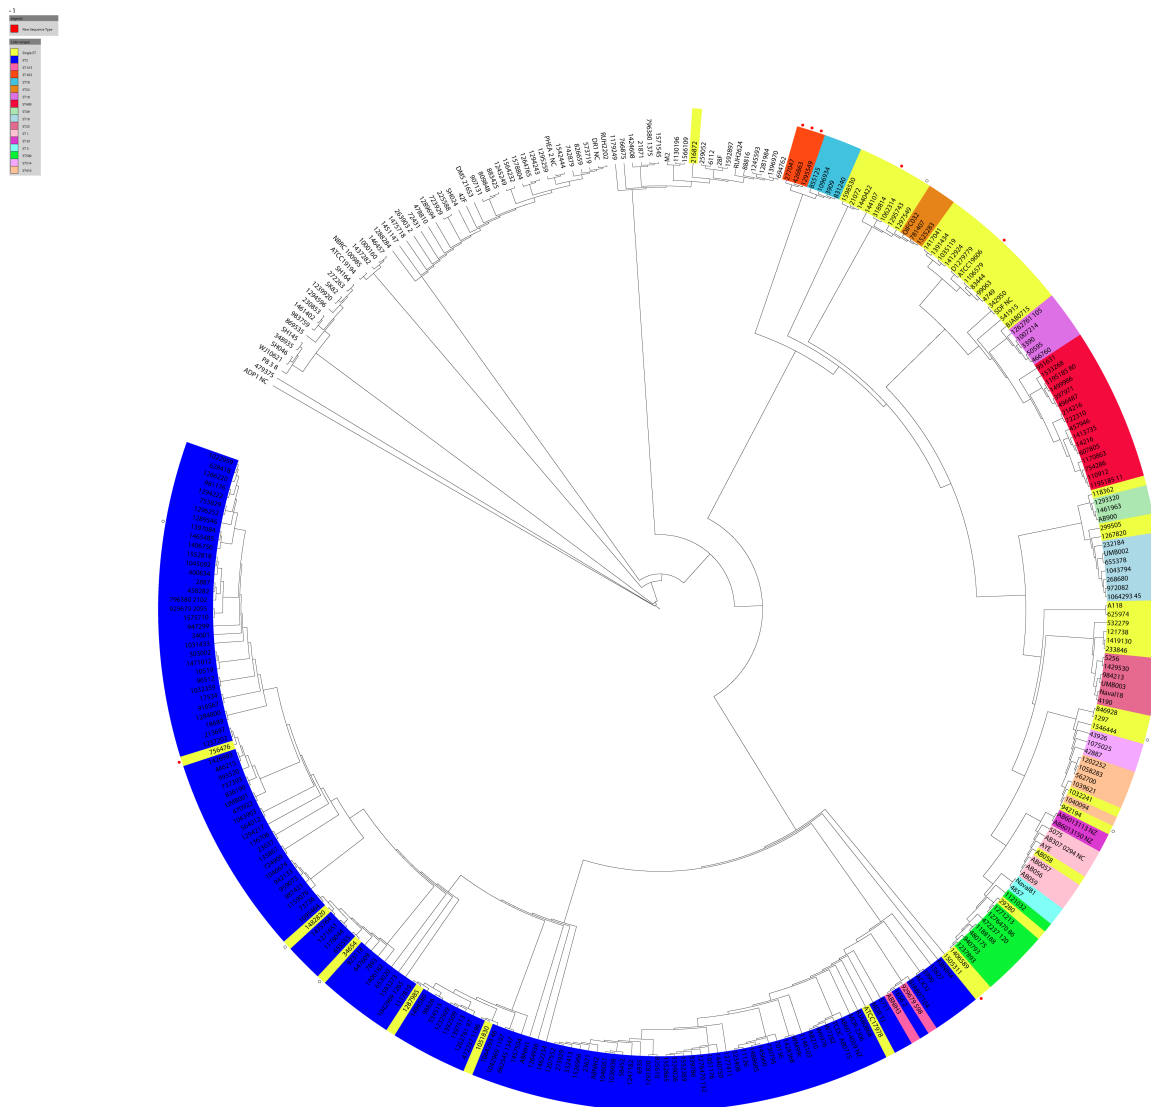

Supplemental Fig. 1. Pasteur sequence types overlaid on the whole genome phylogeny presented in Figure 1. The isolates colored in blue are ST2 and correspond to the phylogenomic group 2 identified in this study.

## Supplemental Figure 2

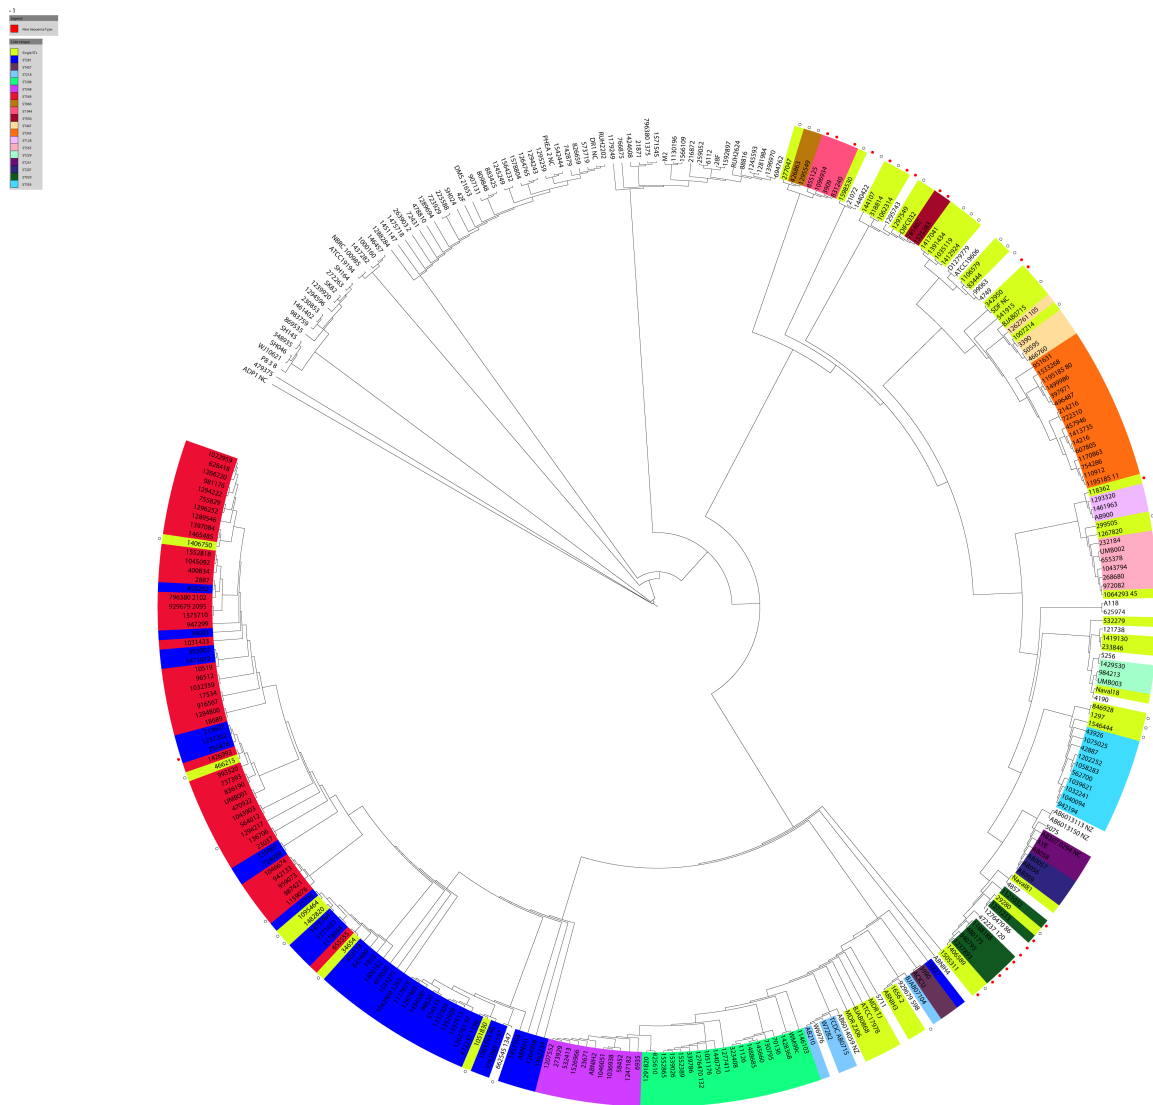

Supplemental Fig. 2. Oxford sequence types overlaid on the whole genome phylogeny presented in Figure 1. The isolates are colored by the sequence types (ST) defined by the MLST system. The diversity of colors indicates that there is little concordance between the whole genome phylogeny and the MLST sequence types.

Supplemental Table 1. Information for isolates analyzed in this study

| Isolate ID | Presumptive Species | Imipenem resistance status* | Isolation source | Year of Isolation | Contig number | Genome size (mb) | GC content (%) | Accession number | Pasteur ST | Oxford ST |
|------------|---------------------|-----------------------------|------------------|-------------------|---------------|------------------|----------------|------------------|------------|-----------|
| 1297       | <i>A. baumannii</i> | R                           | Perirectal       | 2008              | 36            | 3.84             | 39.0           | GCA_000580315.1  | 537        | 1009      |
| 2887       | <i>A. baumannii</i> | R                           | Sputum           | 2011              | 119           | 4.13             | 39.2           | GCA_000584395.1  | 2          | 349       |
| 3390       | <i>A. baumannii</i> | S                           | Perirectal       | 2011              | 62            | 3.99             | 39.0           | GCA_000584335.1  | 10         | 447       |
| 4749       | <i>A. baumannii</i> | S                           | Perirectal       | 2011              | 356           | 4.16             | 38.9           | GCA_000580715.1  | 503        | -         |
| 6935       | <i>A. baumannii</i> | R                           | Perirectal       | 2008              | 105           | 4.85             | 39.2           | GCA_000671455.1  | 2          | 348       |
| 7893       | <i>A. baumannii</i> | R                           | Sputum           | 2012              | 149           | 4.28             | 39.2           | GCA_000583455.1  | 2          | 281       |
| 10519      | <i>A. baumannii</i> | R                           | Sputum           | 2011              | 117           | 4.00             | 39.3           | GCA_000584075.1  | 2          | 349       |
| 11126      | <i>A. baumannii</i> | S                           | Sputum           | 2012              | 91            | 4.06             | 39.1           | GCA_000588655.1  | 2          | 208       |
| 14216      | <i>A. baumannii</i> | R                           | Sputum           | 2012              | 64            | 4.10             | 39.1           | GCA_000588235.1  | 499        | 345       |
| 15827      | <i>A. baumannii</i> | R                           | Perirectal       | 2011              | 589           | 4.64             | 39.0           | GCA_000682315.1  | 2          | 281       |
| 17534      | <i>A. baumannii</i> | R                           | Perirectal       | 2008              | 235           | 4.16             | 38.8           | GCA_000580475.1  | 2          | 349       |
| 18689      | <i>A. baumannii</i> | R                           | Perirectal       | 2008              | 317           | 4.27             | 38.8           | GCA_000681855.1  | 2          | 349       |
| 21072      | <i>A. baumannii</i> | S                           | Perirectal       | 2012              | 369           | 4.18             | 38.9           | GCA_000681575.1  | 336        | -         |
| 23037      | <i>A. baumannii</i> | R                           | Perirectal       | 2008              | 244           | 4.13             | 38.9           | GCA_000681695.1  | 2          | 349       |
| 23671      | <i>A. baumannii</i> | R                           | Sputum           | 2011              | 134           | 4.09             | 39.1           | GCA_000584895.1  | 2          | 348       |
| 29280      | <i>A. baumannii</i> | R                           | Perirectal       | 2011              | 399           | 3.93             | 39.1           | GCA_000581555.1  | 522        | 1021      |
| 34001      | <i>A. baumannii</i> | R                           | Perirectal       | 2008              | 345           | 3.89             | 39.1           | GCA_000581535.1  | 2          | 281       |
| 34654      | <i>A. baumannii</i> | S                           | Perirectal       | 2008              | 105           | 4.10             | 39.1           | GCA_000581515.1  | 670        | 976       |
| 42887      | <i>A. baumannii</i> | R                           | Perirectal       | 2012              | 54            | 3.95             | 39.0           | GCA_000582295.1  | 514        | 354       |
| 43926      | <i>A. baumannii</i> | R                           | Perirectal       | 2012              | 146           | 4.00             | 39.0           | GCA_000582035.1  | 514        | 354       |
| 50595      | <i>A. baumannii</i> | S                           | Perirectal       | 2012              | 220           | 4.03             | 38.9           | GCA_000582155.1  | 10         | 447       |
| 58452      | <i>A. baumannii</i> | R                           | Perirectal       | 2008              | 107           | 4.10             | 38.9           | GCA_000581395.1  | 2          | 348       |
| 70136      | <i>A. baumannii</i> | S                           | Sputum           | 2011              | 71            | 4.07             | 39.0           | GCA_000588315.1  | 2          | 208       |
| 73736      | <i>A. baumannii</i> | R                           | Sputum           | 2011              | 105           | 3.90             | 39.1           | GCA_000584055.1  | 2          | 281       |
| 83444      | <i>A. baumannii</i> | S                           | Perirectal       | 2012              | 273           | 4.00             | 39.0           | GCA_000581855.1  | 533        | 998       |
| 96512      | <i>A. baumannii</i> | R                           | Perirectal       | 2011              | 342           | 4.29             | 39.1           | GCA_000681895.1  | 2          | 349       |
| 98826      | <i>A. baumannii</i> | S                           | Sputum           | 2011              | 110           | 4.08             | 39.3           | GCA_000588375.1  | 2          | 281       |
| 99063      | <i>A. baumannii</i> | S                           | Perirectal       | 2011              | 509           | 4.42             | 39.1           | GCA_000581295.1  | 506        | -         |
| 110912     | <i>A. baumannii</i> | R                           | Perirectal       | 2012              | 5             | 3.95             | 38.9           | GCA_000580495.2  | 499        | 345       |
| 118362     | <i>A. baumannii</i> | S                           | Perirectal       | 2011              | 435           | 4.45             | 38.9           | GCA_000580515.1  | 241        | 951       |
| 121738     | <i>A. baumannii</i> | S                           | Sputum           | 2012              | 94            | 4.04             | 39.2           | GCA_000583375.1  | 138        | -         |
| 135867     | <i>A. baumannii</i> | R                           | Perirectal       | 2011              | 283           | 4.61             | 39.0           | GCA_000682195.1  | 2          | 281       |
| 136706     | <i>A. baumannii</i> | R                           | Perirectal       | 2008              | 216           | 4.14             | 39.0           | GCA_000580335.1  | 2          | 349       |
| 144107     | <i>A. baumannii</i> | S                           | Perirectal       | 2012              | 84            | 3.92             | 39.1           | GCA_000581875.1  | 154        | 943       |
| 145660     | <i>A. baumannii</i> | S                           | Sputum           | 2011              | 80            | 4.07             | 39.1           | GCA_000587875.1  | 2          | 208       |
| 213697     | <i>A. baumannii</i> | R                           | Sputum           | 2011              | 107           | 4.09             | 39.3           | GCA_000588495.1  | 2          | 281       |
| 214216     | <i>A. baumannii</i> | R                           | Sputum           | 2011              | 58            | 4.05             | 39.1           | GCA_000587955.1  | 499        | 345       |
| 232184     | <i>A. baumannii</i> | S                           | Perirectal       | 2012              | 59            | 3.87             | 39.0           | GCA_000581915.1  | 16         | 355       |
| 233846     | <i>A. baumannii</i> | S                           | Sputum           | 2011              | 69            | 4.51             | 38.9           | GCA_000682435.1  | 126        | 955       |
| 268680     | <i>A. baumannii</i> | S                           | Perirectal       | 2012              | 43            | 3.86             | 39.0           | GCA_000581955.1  | 16         | 355       |
| 273929     | <i>A. baumannii</i> | R                           | Sputum           | 2011              | 115           | 3.95             | 39.1           | GCA_000584875.1  | 2          | 348       |
| 277047     | <i>A. baumannii</i> | S                           | Sputum           | 2011              | 39            | 3.90             | 39.1           | GCA_000588195.1  | 652        | 967       |
| 299505     | <i>A. baumannii</i> | S                           | Perirectal       | 2011              | 125           | 3.97             | 38.8           | GCA_000580975.1  | 508        | 1026      |
| 303002     | <i>A. baumannii</i> | R                           | Sputum           | 2012              | 98            | 3.89             | 39.2           | GCA_000588435.1  | 2          | 281       |
| 318814     | <i>A. baumannii</i> | S                           | Perirectal       | 2011              | 41            | 4.13             | 39.0           | GCA_000584355.1  | 651        | 964       |
| 323408     | <i>A. baumannii</i> | S                           | Sputum           | 2012              | 97            | 4.14             | 38.9           | GCA_000583235.1  | 2          | 208       |
| 339786     | <i>A. baumannii</i> | S                           | Sputum           | 2012              | 89            | 4.02             | 39.0           | GCA_000588055.1  | 2          | 208       |
| 342950     | <i>A. baumannii</i> | S                           | Perirectal       | 2011              | 296           | 4.13             | 39.1           | GCA_000580695.1  | 512        | 952       |
| 397971     | <i>A. baumannii</i> | R                           | Perirectal       | 2012              | 44            | 3.95             | 39.0           | GCA_000582275.1  | 499        | 345       |
| 400834     | <i>A. baumannii</i> | R                           | Perirectal       | 2011              | 217           | 4.10             | 39.1           | GCA_000581235.1  | 2          | 349       |
| 426863     | <i>A. baumannii</i> | S                           | Sputum           | 2011              | 20            | 3.89             | 39.1           | GCA_000588475.1  | 652        | 966       |
| 457946     | <i>A. baumannii</i> | R                           | Sputum           | 2011              | 91            | 4.19             | 39.1           | GCA_000584295.1  | 499        | 345       |
| 458282     | <i>A. baumannii</i> | R                           | Sputum           | 2012              | 126           | 4.04             | 39.3           | GCA_000583255.1  | 2          | 281       |
| 466215     | <i>A. baumannii</i> | R                           | Sputum           | 2011              | 119           | 4.03             | 39.2           | GCA_000588215.1  | 2          | 981       |
| 466760     | <i>A. baumannii</i> | S                           | Perirectal       | 2011              | 39            | 3.88             | 39.1           | GCA_000580995.1  | 10         | 447       |
| 470922     | <i>A. baumannii</i> | R                           | Sputum           | 2012              | 147           | 4.22             | 39.3           | GCA_000583295.1  | 2          | 349       |
| 480175     | <i>A. baumannii</i> | R                           | Sputum           | 2011              | 82            | 4.06             | 39.1           | GCA_000584275.1  | 500        | 929       |
| 496487     | <i>A. baumannii</i> | R                           | Perirectal       | 2011              | 336           | 4.31             | 38.9           | GCA_000682215.1  | 499        | 345       |
| 532279     | <i>A. baumannii</i> | S                           | Perirectal       | 2012              | 34            | 4.04             | 38.8           | GCA_000581895.1  | 519        | 1027      |
| 532413     | <i>A. baumannii</i> | R                           | Perirectal       | 2008              | 95            | 4.13             | 39.0           | GCA_000581695.1  | 2          | 348       |
| 541915     | <i>A. baumannii</i> | S                           | Sputum           | 2011              | 93            | 3.81             | 39.1           | GCA_000588035.1  | 532        | 370       |
| 554515     | <i>A. baumannii</i> | S                           | Perirectal       | 2012              | 296           | 4.05             | 39.0           | GCA_000581815.1  | 2          | 281       |
| 562700     | <i>A. baumannii</i> | R                           | Perirectal       | 2008              | 64            | 3.97             | 39.0           | GCA_000581475.1  | 416        | 354       |
| 564012     | <i>A. baumannii</i> | R                           | Perirectal       | 2008              | 120           | 4.13             | 39.1           | GCA_000581455.1  | 2          | 349       |
| 607805     | <i>A. baumannii</i> | S                           | Perirectal       | 2012              | 107           | 4.09             | 39.0           | GCA_000584315.1  | 499        | 345       |
| 625974     | <i>A. baumannii</i> | S                           | Perirectal       | 2011              | 132           | 4.07             | 39.0           | GCA_000581255.1  | 509        | -         |
| 628418     | <i>A. baumannii</i> | R                           | Sputum           | 2011              | 141           | 4.16             | 39.2           | GCA_000588175.1  | 2          | 349       |
| 647609     | <i>A. baumannii</i> | R                           | Perirectal       | 2011              | 168           | 4.03             | 39.1           | GCA_000581015.1  | 2          | 281       |
| 653020     | <i>A. baumannii</i> | I                           | Perirectal       | 2011              | 118           | 3.91             | 38.9           | GCA_000581655.1  | 2          | 281       |
| 655378     | <i>A. baumannii</i> | S                           | Perirectal       | 2012              | 31            | 3.97             | 39.0           | GCA_000582965.2  | 16         | 355       |
| 655555     | <i>A. baumannii</i> | R                           | Perirectal       | 2012              | 198           | 4.04             | 38.9           | GCA_000584235.1  | 2          | 349       |
| 722310     | <i>A. baumannii</i> | R                           | Sputum           | 2012              | 72            | 4.04             | 39.0           | GCA_000583275.1  | 499        | 345       |
| 724909     | <i>A. baumannii</i> | R                           | Perirectal       | 2012              | 178           | 4.07             | 39.0           | GCA_000580735.1  | 2          | 281       |
| 730795     | <i>A. baumannii</i> | I                           | Sputum           | 2012              | 89            | 4.05             | 39.1           | GCA_000588555.1  | 2          | 208       |
| 737393     | <i>A. baumannii</i> | R                           | Sputum           | 2011              | 110           | 4.13             | 39.2           | GCA_000584195.1  | 2          | 349       |
| 754286     | <i>A. baumannii</i> | R                           | Perirectal       | 2012              | 497           | 4.28             | 38.7           | GCA_000682255.1  | 499        | 345       |
| 755829     | <i>A. baumannii</i> | R                           | Sputum           | 2011              | 139           | 4.18             | 39.1           | GCA_000587935.1  | 2          | 349       |
| 756476     | <i>A. baumannii</i> | R                           | Sputum           | 2012              | 163           | 4.11             | 39.1           | GCA_000682595.1  | 664        | 281       |
| 781407     | <i>A. baumannii</i> | S                           | Perirectal       | 2011              | 73            | 4.07             | 39.2           | GCA_000581435.1  | 32         | 930       |
| 825610     | <i>A. baumannii</i> | S                           | Perirectal       | 2012              | 136           | 4.07             | 38.9           | GCA_000584175.1  | 2          | 208       |
| 831240     | <i>A. baumannii</i> | S                           | Perirectal       | 2012              | 103           | 3.97             | 39.0           | GCA_000581975.1  | 78         | 944       |
| 836190     | <i>A. baumannii</i> | R                           | Sputum           | 2011              | 115           | 4.04             | 39.2           | GCA_000584155.1  | 2          | 349       |
| 846928     | <i>A. baumannii</i> | S                           | Sputum           | 2011              | 58            | 3.91             | 38.9           | GCA_000584095.1  | 535        | 1011      |
| 855125     | <i>A. baumannii</i> | S                           | Perirectal       | 2012              | 441           | 4.40             | 38.9           | GCA_000681555.1  | 78         | 944       |
| 916567     | <i>A. baumannii</i> | R                           | Perirectal       | 2008              | 415           | 4.35             | 39.0           | GCA_000681875.1  | 2          | 349       |
| 923118     | <i>A. baumannii</i> | R                           | Perirectal       | 2011              | 176           | 4.19             | 39.1           | GCA_000584135.1  | 2          | 281       |
| 940793     | <i>A. baumannii</i> | R                           | Perirectal       | 2011              | 474           | 4.34             | 38.9           | GCA_000682295.1  | 500        | 929       |
| 942133     | <i>A. baumannii</i> | R                           | Perirectal       | 2008              | 268           | 4.18             | 39.7           | GCA_000581355.1  | 2          | 349       |
| 942194     | <i>A. baumannii</i> | R                           | Perirectal       | 2008              | 121           | 4.01             | 39.0           | GCA_000581595.1  | 650        | 354       |
| 947299     | <i>A. baumannii</i> | R                           | Perirectal       | 2008              | 323           | 4.06             | 39.1           | GCA_000581635.1  | 2          | 349       |
| 951631     | <i>A. baumannii</i> | R                           | Perirectal       | 2012              | 365           | 4.35             | 39.0           | GCA_000580755.1  | 499        | 345       |
| 959073     | <i>A. baumannii</i> | R                           | Perirectal       | 2008              | 489           | 4.04             | 39.2           | GCA_000581335.1  | 2          | 349       |
| 972082     | <i>A. baumannii</i> | S                           | Perirectal       | 2008              | 286           | 3.98             | 39.0           | GCA_000581315.1  | 16         | 355       |

|              |              |   |            |      |     |      |      |                 |     |      |
|--------------|--------------|---|------------|------|-----|------|------|-----------------|-----|------|
| 981176       | A. baumannii | R | Sputum     | 2012 | 157 | 4.13 | 39.1 | GCA_000588295.1 | 2   | 349  |
| 984213       | A. baumannii | S | Perirectal | 2011 | 463 | 4.18 | 39.2 | GCA_000581055.1 | 25  | 229  |
| 987421       | A. baumannii | R | Perirectal | 2008 | 274 | 4.18 | 38.9 | GCA_000681735.1 | 2   | 349  |
| 993520       | A. baumannii | R | Perirectal | 2008 | 109 | 4.16 | 39.2 | GCA_000581615.1 | 2   | 349  |
| 1007214      | A. baumannii | S | Sputum     | 2011 | 46  | 3.95 | 38.9 | GCA_000588675.1 | 10  | 374  |
| 1022959      | A. baumannii | R | Sputum     | 2011 | 136 | 4.15 | 39.1 | GCA_000584735.1 | 2   | 349  |
| 1031433      | A. baumannii | R | Perirectal | 2008 | 171 | 4.03 | 38.9 | GCA_000580295.1 | 2   | 349  |
| 1032241      | A. baumannii | R | Perirectal | 2008 | 211 | 4.03 | 39.1 | GCA_000580455.1 | 527 | 354  |
| 1032359      | A. baumannii | R | Perirectal | 2008 | 632 | 4.69 | 39.0 | GCA_000671695.1 | 2   | 349  |
| 1035119      | A. baumannii | S | Perirectal | 2011 | 55  | 3.93 | 39.1 | GCA_000580815.1 | 536 | 963  |
| 1036938      | A. baumannii | R | Perirectal | 2008 | 242 | 4.15 | 39.1 | GCA_000580275.1 | 2   | 348  |
| 1039621      | A. baumannii | R | Perirectal | 2008 | 75  | 3.98 | 39.1 | GCA_000580435.1 | 416 | 354  |
| 1040094      | A. baumannii | S | Perirectal | 2008 | 67  | 3.98 | 39.1 | GCA_000580255.1 | 416 | 354  |
| 1043794      | A. baumannii | R | Perirectal | 2008 | 51  | 4.01 | 39.1 | GCA_000580415.1 | 16  | 355  |
| 1043903      | A. baumannii | R | Perirectal | 2008 | 252 | 4.16 | 38.9 | GCA_000580215.1 | 2   | 349  |
| 1045092      | A. baumannii | R | Sputum     | 2011 | 113 | 4.10 | 39.2 | GCA_000584115.1 | 2   | 349  |
| 1046051      | A. baumannii | R | Perirectal | 2008 | 208 | 4.12 | 39.1 | GCA_000580195.1 | 2   | 348  |
| 1046674      | A. baumannii | R | Perirectal | 2008 | 204 | 3.99 | 38.9 | GCA_000580395.1 | 2   | 349  |
| 1051176      | A. baumannii | S | Perirectal | 2008 | 71  | 3.86 | 39.1 | GCA_000580375.1 | 2   | 208  |
| 1051830      | A. baumannii | R | Perirectal | 2008 | 90  | 3.89 | 38.9 | GCA_000580175.1 | 523 | 974  |
| 1058283      | A. baumannii | R | Sputum     | 2011 | 94  | 4.14 | 39.0 | GCA_000588075.1 | 416 | 354  |
| 1062314      | A. baumannii | R | Sputum     | 2011 | 45  | 4.04 | 39.0 | GCA_000584715.1 | 54  | 956  |
| 1075025      | A. baumannii | R | Perirectal | 2011 | 165 | 3.93 | 39.0 | GCA_000580155.1 | 514 | 354  |
| 1095464      | A. baumannii | R | Sputum     | 2011 | 100 | 3.98 | 39.0 | GCA_000584675.1 | 2   | 979  |
| 1096934      | A. baumannii | S | Perirectal | 2012 | 237 | 4.33 | 39.0 | GCA_000581755.1 | 78  | 944  |
| 1106579      | A. baumannii | S | Perirectal | 2012 | 260 | 4.00 | 39.0 | GCA_000581775.1 | 505 | 997  |
| 1117819      | A. baumannii | R | Sputum     | 2011 | 96  | 3.94 | 39.0 | GCA_000588455.1 | 2   | 281  |
| 1121032      | A. baumannii | R | Perirectal | 2011 | 81  | 4.15 | 39.0 | GCA_000580355.1 | 500 | 929  |
| 1146103      | A. baumannii | R | Perirectal | 2012 | 376 | 4.40 | 39.1 | GCA_000682235.1 | 2   | 208  |
| 1159076      | A. baumannii | R | Perirectal | 2012 | 305 | 4.25 | 39.0 | GCA_000580835.1 | 2   | 349  |
| 1170863      | A. baumannii | R | Sputum     | 2011 | 59  | 4.09 | 39.0 | GCA_000588615.1 | 499 | 345  |
| 1178044      | A. baumannii | R | Sputum     | 2011 | 94  | 4.01 | 39.1 | GCA_000584655.1 | 2   | 281  |
| 1188188      | A. baumannii | R | Sputum     | 2011 | 89  | 4.14 | 39.0 | GCA_000584635.1 | 500 | 929  |
| 1202252      | A. baumannii | R | Perirectal | 2011 | 189 | 4.12 | 39.0 | GCA_000580535.1 | 416 | 354  |
| 1207552      | A. baumannii | R | Sputum     | 2011 | 116 | 4.11 | 39.1 | GCA_000584495.1 | 2   | 348  |
| 1232509      | A. baumannii | R | Sputum     | 2011 | 95  | 4.02 | 39.1 | GCA_000588155.1 | 2   | 281  |
| 1237202      | A. baumannii | R | Sputum     | 2011 | 110 | 4.19 | 39.2 | GCA_000588635.1 | 2   | 281  |
| 1237893      | A. baumannii | R | Sputum     | 2011 | 79  | 4.02 | 39.1 | GCA_000584535.1 | 500 | 929  |
| 1247182      | A. baumannii | R | Perirectal | 2011 | 89  | 3.99 | 39.1 | GCA_000580135.1 | 2   | 348  |
| 1264936      | A. baumannii | R | Sputum     | 2011 | 99  | 3.93 | 39.1 | GCA_000584475.1 | 2   | 281  |
| 1286220      | A. baumannii | R | Sputum     | 2011 | 110 | 4.14 | 39.2 | GCA_000587975.1 | 2   | 349  |
| 1267820      | A. baumannii | S | Perirectal | 2011 | 255 | 3.78 | 39.2 | GCA_000581075.1 | 103 | 514  |
| 1271213      | A. baumannii | R | Sputum     | 2011 | 82  | 4.04 | 39.1 | GCA_000584595.1 | 500 | 929  |
| 1271651      | A. baumannii | R | Sputum     | 2011 | 97  | 3.96 | 39.2 | GCA_000584555.1 | 2   | 281  |
| 1277411      | A. baumannii | S | Perirectal | 2012 | 289 | 4.22 | 39.1 | GCA_000581735.1 | 2   | 208  |
| 1284800      | A. baumannii | R | Perirectal | 2011 | 523 | 4.49 | 39.0 | GCA_000682395.1 | 2   | 349  |
| 1287985      | A. baumannii | R | Sputum     | 2011 | 113 | 4.00 | 39.1 | GCA_000584035.1 | 195 | 281  |
| 1289546      | A. baumannii | R | Perirectal | 2011 | 133 | 4.13 | 39.1 | GCA_000581575.1 | 2   | 349  |
| 1291820      | A. baumannii | S | Perirectal | 2012 | 205 | 4.10 | 39.0 | GCA_000582115.1 | 2   | 208  |
| 1293320      | A. baumannii | S | Sputum     | 2011 | 51  | 4.00 | 39.1 | GCA_000584455.1 | 49  | 128  |
| 1294217      | A. baumannii | R | Perirectal | 2011 | 140 | 4.15 | 39.2 | GCA_000580555.1 | 2   | 349  |
| 1294222      | A. baumannii | R | Sputum     | 2011 | 131 | 4.15 | 39.1 | GCA_000587915.1 | 2   | 349  |
| 1295449      | A. baumannii | S | Sputum     | 2011 | 30  | 3.92 | 39.1 | GCA_000588135.1 | 652 | 966  |
| 1295743      | A. baumannii | S | Perirectal | 2011 | 201 | 4.32 | 39.3 | GCA_000580875.1 | 240 | -    |
| 1296252      | A. baumannii | R | Sputum     | 2011 | 140 | 4.07 | 39.0 | GCA_000584435.1 | 2   | 349  |
| 1297549      | A. baumannii | S | Perirectal | 2011 | 180 | 3.86 | 39.1 | GCA_000580775.1 | 528 | 1003 |
| 1391434      | A. baumannii | S | Sputum     | 2011 | 51  | 3.68 | 39.0 | GCA_000588755.1 | 285 | 1012 |
| 1392509      | A. baumannii | R | Sputum     | 2011 | 100 | 4.02 | 39.1 | GCA_000588735.1 | 2   | 281  |
| 1397084      | A. baumannii | R | Perirectal | 2011 | 318 | 3.92 | 39.1 | GCA_000580895.1 | 2   | 349  |
| 1397513      | A. baumannii | R | Sputum     | 2011 | 98  | 3.99 | 39.0 | GCA_000588815.1 | 2   | 281  |
| 1406182      | A. baumannii | R | Sputum     | 2012 | 107 | 4.14 | 39.1 | GCA_000588795.1 | 2   | 281  |
| 1406589      | A. baumannii | R | Sputum     | 2011 | 183 | 4.17 | 39.1 | GCA_000588355.1 | 521 | 1022 |
| 1406750      | A. baumannii | R | Perirectal | 2011 | 231 | 4.15 | 39.0 | GCA_000580575.1 | 2   | 975  |
| 1412924      | A. baumannii | S | Perirectal | 2011 | 63  | 3.82 | 39.1 | GCA_000584415.1 | 510 | 965  |
| 1413735      | A. baumannii | R | Sputum     | 2011 | 63  | 4.10 | 39.1 | GCA_000588775.1 | 499 | 345  |
| 1417041      | A. baumannii | S | Perirectal | 2011 | 55  | 3.70 | 39.0 | GCA_000582355.1 | 108 | 105  |
| 1419130      | A. baumannii | S | Perirectal | 2011 | 154 | 4.38 | 39.0 | GCA_000580595.1 | 529 | 954  |
| 1426993      | A. baumannii | R | Sputum     | 2012 | 127 | 4.23 | 39.4 | GCA_000583355.1 | 2   | 349  |
| 1428368      | A. baumannii | S | Sputum     | 2012 | 80  | 4.09 | 39.2 | GCA_000588575.2 | 2   | 208  |
| 1429530      | A. baumannii | S | Perirectal | 2011 | 31  | 3.99 | 39.0 | GCA_000581135.1 | 25  | 229  |
| 1440422      | A. baumannii | S | Perirectal | 2011 | 357 | 3.86 | 39.0 | GCA_000580615.1 | 203 | -    |
| 1440750      | A. baumannii | R | Perirectal | 2012 | 399 | 4.21 | 38.8 | GCA_000581795.1 | 2   | 208  |
| 1457504      | A. baumannii | R | Perirectal | 2012 | 14  | 4.02 | 39.3 | GCA_000584375.2 | 2   | 281  |
| 1461963      | A. baumannii | S | Perirectal | 2011 | 140 | 4.10 | 38.9 | GCA_000581155.1 | 49  | 128  |
| 1462234      | A. baumannii | R | Perirectal | 2011 | 477 | 4.34 | 38.9 | GCA_000580935.1 | 2   | 281  |
| 1465485      | A. baumannii | R | Perirectal | 2012 | 230 | 4.25 | 39.1 | GCA_000581175.1 | 2   | 349  |
| 1471012      | A. baumannii | R | Perirectal | 2012 | 134 | 3.94 | 39.1 | GCA_000584775.1 | 2   | 281  |
| 1475764      | A. baumannii | R | Perirectal | 2012 | 127 | 4.00 | 39.3 | GCA_000584835.1 | 2   | 281  |
| 1482820      | A. baumannii | R | Perirectal | 2012 | 96  | 4.01 | 39.3 | GCA_000584755.1 | 671 | 980  |
| 1488685      | A. baumannii | S | Sputum     | 2012 | 90  | 4.11 | 39.0 | GCA_000583335.1 | 2   | 208  |
| 1494580      | A. baumannii | R | Sputum     | 2012 | 136 | 4.22 | 39.2 | GCA_000587895.1 | 2   | 281  |
| 1499986      | A. baumannii | R | Perirectal | 2012 | 276 | 4.12 | 38.8 | GCA_000682375.1 | 499 | 345  |
| 1505311      | A. baumannii | R | Sputum     | 2012 | 118 | 4.14 | 39.1 | GCA_000681595.1 | 663 | 949  |
| 1525283      | A. baumannii | S | Perirectal | 2012 | 186 | 3.97 | 39.1 | GCA_000582175.1 | 32  | 930  |
| 1526966      | A. baumannii | R | Perirectal | 2012 | 86  | 4.03 | 39.1 | GCA_000582015.1 | 2   | 348  |
| 1533268      | A. baumannii | R | Perirectal | 2012 | 34  | 3.88 | 39.0 | GCA_000584855.1 | 499 | 345  |
| 1539026      | A. baumannii | R | Sputum     | 2012 | 137 | 4.15 | 39.1 | GCA_000681835.1 | 2   | 208  |
| 1546444      | A. baumannii | S | Perirectal | 2012 | 140 | 3.80 | 39.0 | GCA_000581995.1 | 504 | 1010 |
| 1552389      | A. baumannii | S | Sputum     | 2012 | 80  | 4.03 | 39.0 | GCA_000583315.1 | 2   | 208  |
| 1552818      | A. baumannii | R | Perirectal | 2012 | 196 | 4.03 | 39.2 | GCA_000582945.1 | 2   | 349  |
| 1552865      | A. baumannii | S | Perirectal | 2012 | 123 | 4.01 | 39.0 | GCA_000582215.1 | 2   | 208  |
| 1575710      | A. baumannii | R | Perirectal | 2012 | 128 | 4.13 | 39.1 | GCA_000581935.1 | 2   | 349  |
| 1593273      | A. baumannii | R | Perirectal | 2012 | 273 | 4.13 | 38.9 | GCA_000582335.1 | 2   | 281  |
| 1598530      | A. baumannii | S | Perirectal | 2012 | 41  | 3.88 | 39.0 | GCA_000682415.1 | 56  | 972  |
| 1042969_1197 | A. baumannii | S | Perirectal | 2008 | 157 | 4.25 | 39.3 | GCA_000682455.1 | 2   | 281  |
| 1042969_1265 | A. baumannii | R | Perirectal | 2008 | 167 | 4.07 | 39.2 | GCA_000580235.1 | 2   | 281  |
| 1064293_45   | A. baumannii | S | Sputum     | 2011 | 186 | 3.92 | 39.1 | GCA_000584695.1 | 16  | 1001 |

|             |                                |   |  |            |      |     |      |      |                 |     |      |
|-------------|--------------------------------|---|--|------------|------|-----|------|------|-----------------|-----|------|
| 1064293_46  | <i>A. baumannii</i>            | R |  | Sputum     | 2011 | 130 | 4.26 | 39.2 | GCA_000671435.1 | 2   | 281  |
| 1195185_11  | <i>A. baumannii</i>            | S |  | Sputum     | 2011 | 30  | 4.11 | 39.0 | GCA_000584515.2 | 499 | 345  |
| 1195185_80  | <i>A. baumannii</i>            | R |  | Sputum     | 2011 | 99  | 4.26 | 39.1 | NA              | 499 | 345  |
| 1262761_105 | <i>A. baumannii</i>            | S |  | Sputum     | 2011 | 65  | 4.14 | 39.1 | GCA_000682475.1 | 10  | 447  |
| 1262761_97  | <i>A. baumannii</i>            | R |  | Sputum     | 2011 | 96  | 4.00 | 39.0 | GCA_000588695.1 | 2   | 281  |
| 1276470_132 | <i>A. baumannii</i>            | I |  | Sputum     | 2012 | 121 | 4.12 | 39.0 | GCA_000682495.1 | 2   | 208  |
| 1276470_86  | <i>A. baumannii</i>            | R |  | Sputum     | 2011 | 95  | 4.06 | 39.1 | GCA_000588115.1 | 500 | -    |
| 472237_1196 | <i>A. baumannii</i>            | S |  | Perirectal | 2008 | 129 | 4.17 | 39.2 | GCA_000581495.1 | 2   | 281  |
| 472237_120  | <i>A. baumannii</i>            | R |  | Sputum     | 2011 | 91  | 4.05 | 39.0 | GCA_000583415.1 | 500 | -    |
| 662545_1347 | <i>A. baumannii</i>            | S |  | Perirectal | 2008 | 482 | 3.99 | 39.3 | GCA_000581675.1 | 2   | -    |
| 796380_2102 | <i>A. baumannii</i>            | R |  | Perirectal | 2008 | 198 | 4.21 | 39.1 | GCA_000581415.1 | 2   | 349  |
| 929679_2095 | <i>A. baumannii</i>            | R |  | Perirectal | 2008 | 305 | 4.17 | 39.3 | GCA_000581375.1 | 2   | 349  |
| 929679_598  | <i>A. baumannii</i>            | S |  | Perirectal | 2006 | 551 | 4.70 | 39.2 | GCA_000682635.1 | 415 | -    |
| 479375      | <i>Acinetobacter sp.</i>       | S |  | Perirectal | 2012 | 81  | 3.46 | 40.1 | GCA_000581715.1 | UD  | UD   |
| 348935      | <i>A. haemolyticus</i>         | S |  | Perirectal | 2011 | 438 | 3.41 | 42.2 | GCA_000580795.1 | UD  | UD   |
| 869535      | <i>A. radioresistans</i>       | S |  | Perirectal | 2012 | 266 | 3.24 | 41.7 | GCA_000581035.1 | UD  | UD   |
| 983759      | <i>A. radioresistans</i>       | S |  | Perirectal | 2012 | 90  | 3.30 | 41.7 | GCA_000582135.1 | UD  | UD   |
| 1461402     | <i>A. radioresistans</i>       | S |  | Perirectal | 2011 | 59  | 3.21 | 41.6 | GCA_000580635.1 | UD  | UD   |
| 230853      | <i>A. radioresistans</i>       | S |  | Perirectal | 2011 | 55  | 3.24 | 41.5 | GCA_000581195.1 | UD  | UD   |
| 1294596     | <i>A. radioresistans</i>       | S |  | Perirectal | 2011 | 155 | 3.35 | 41.4 | GCA_000582925.1 | UD  | UD   |
| 1239920     | <i>A. radioresistans</i>       | S |  | Perirectal | 2011 | 52  | 3.29 | 41.6 | GCA_000582235.1 | UD  | UD   |
| 272263      | <i>A. radioresistans</i>       | S |  | Perirectal | 2012 | 161 | 3.36 | 41.6 | GCA_000581215.1 | UD  | UD   |
| 1437282     | <i>Acinetobacter sp.</i>       | S |  | Perirectal | 2011 | 35  | 3.95 | 43.0 | GCA_000580915.1 | UD  | UD   |
| 1000160     | <i>Acinetobacter sp.</i>       | S |  | Sputum     | 2008 | 35  | 3.98 | 42.9 | GCA_000588715.2 | UD  | UD   |
| 146457      | <i>Acinetobacter sp.</i>       | S |  | Perirectal | 2011 | 45  | 4.07 | 42.8 | GCA_000580655.1 | UD  | UD   |
| 1288284     | <i>A. calcoaceticus/pittii</i> | R |  | Perirectal | 2011 | 956 | 6.05 | 39.0 | GCA_000681715.1 | UD  | UD   |
| 1451147     | <i>A. calcoaceticus/pittii</i> | S |  | Perirectal | 2012 | 539 | 4.32 | 38.6 | GCA_000681535.1 | UD  | UD   |
| 1475718     | <i>A. calcoaceticus/pittii</i> | S |  | Perirectal | 2012 | 363 | 4.26 | 38.6 | GCA_000580955.1 | UD  | UD   |
| 263903_2    | <i>A. calcoaceticus/pittii</i> | S |  | Perirectal | 2012 | 90  | 4.13 | 38.8 | GCA_000583395.1 | UD  | UD   |
| 72431       | <i>A. calcoaceticus/pittii</i> | S |  | Perirectal | 2012 | 372 | 4.40 | 38.9 | GCA_000682355.1 | UD  | UD   |
| 478810      | <i>A. calcoaceticus/pittii</i> | R |  | Perirectal | 2012 | 280 | 4.13 | 38.7 | GCA_000584015.2 | UD  | UD   |
| 1289694     | <i>A. calcoaceticus/pittii</i> | S |  | Perirectal | 2011 | 141 | 4.19 | 38.7 | GCA_000580855.1 | UD  | UD   |
| 723929      | <i>A. calcoaceticus/pittii</i> | S |  | Perirectal | 2012 | 134 | 4.09 | 38.7 | GCA_000584215.1 | UD  | UD   |
| 225588      | <i>A. calcoaceticus/pittii</i> | S |  | Sputum     | 2011 | 69  | 3.96 | 38.8 | GCA_000588415.1 | UD  | UD   |
| 907131      | <i>A. calcoaceticus/pittii</i> | S |  | Perirectal | 2012 | 47  | 3.89 | 38.8 | GCA_000582195.1 | UD  | UD   |
| 809848      | <i>A. calcoaceticus/pittii</i> | S |  | Perirectal | 2011 | 219 | 4.15 | 38.7 | GCA_000581275.1 | UD  | UD   |
| 883425      | <i>A. calcoaceticus/pittii</i> | S |  | Sputum     | 2012 | 62  | 4.04 | 38.8 | GCA_000588395.1 | UD  | UD   |
| 1245249     | <i>A. calcoaceticus/pittii</i> | S |  | Perirectal | 2011 | 230 | 3.96 | 38.9 | GCA_000584575.1 | UD  | UD   |
| 1564232     | <i>A. calcoaceticus/pittii</i> | S |  | Perirectal | 2012 | 23  | 3.90 | 39.0 | GCA_000584815.2 | UD  | UD   |
| 1578804     | <i>A. calcoaceticus/pittii</i> | S |  | Perirectal | 2012 | 169 | 4.10 | 38.7 | GCA_000582075.1 | UD  | UD   |
| 1264765     | <i>A. calcoaceticus/pittii</i> | S |  | Sputum     | 2011 | 74  | 4.26 | 39.0 | GCA_000681815.1 | UD  | UD   |
| 1294243     | <i>A. calcoaceticus/pittii</i> | S |  | Sputum     | 2011 | 69  | 4.13 | 38.8 | GCA_000588015.1 | UD  | UD   |
| 1295259     | <i>A. calcoaceticus/pittii</i> | S |  | Perirectal | 2011 | 103 | 4.12 | 38.8 | GCA_000581095.1 | UD  | UD   |
| 1542444     | <i>A. calcoaceticus/pittii</i> | S |  | Perirectal | 2012 | 28  | 3.94 | 38.8 | GCA_000581835.1 | UD  | UD   |
| 742879      | <i>A. calcoaceticus/pittii</i> | S |  | Sputum     | 2011 | 55  | 4.04 | 38.8 | GCA_000588535.1 | UD  | UD   |
| 826659      | <i>A. calcoaceticus/pittii</i> | S |  | Sputum     | 2012 | 40  | 3.92 | 38.9 | GCA_000588515.1 | UD  | UD   |
| 573719      | <i>A. calcoaceticus/pittii</i> | S |  | Sputum     | 2008 | 62  | 4.26 | 39.1 | GCA_000588275.1 | UD  | UD   |
| 694762      | <i>A. nosocomialis</i>         | S |  | Perirectal | 2012 | 136 | 4.09 | 38.8 | GCA_000584255.1 | UD  | UD   |
| 1396970     | <i>A. nosocomialis</i>         | S |  | Perirectal | 2011 | 339 | 4.19 | 38.9 | GCA_000581115.1 | UD  | UD   |
| 1281984     | <i>A. nosocomialis</i>         | S |  | Sputum     | 2012 | 50  | 4.07 | 38.8 | GCA_000588595.1 | UD  | UD   |
| 1245593     | <i>A. nosocomialis</i>         | S |  | Sputum     | 2011 | 75  | 4.10 | 38.7 | GCA_000584615.1 | UD  | UD   |
| 88816       | <i>A. nosocomialis</i>         | S |  | Sputum     | 2011 | 97  | 4.11 | 38.8 | GCA_000588335.1 | UD  | UD   |
| 1592897     | <i>A. nosocomialis</i>         | S |  | Perirectal | 2012 | 29  | 4.14 | 38.9 | NA              | UD  | UD   |
| 6112        | <i>A. nosocomialis</i>         | S |  | Perirectal | 2012 | 467 | 4.33 | 38.6 | GCA_000682335.1 | UD  | UD   |
| 259052      | <i>A. nosocomialis</i>         | S |  | Perirectal | 2012 | 124 | 4.14 | 38.9 | GCA_000582095.1 | UD  | UD   |
| 216872      | <i>A. nosocomialis</i>         | S |  | Sputum     | 2011 | 121 | 4.17 | 38.8 | GCA_000584795.1 | 530 | 1019 |
| 1566109     | <i>A. nosocomialis</i>         | S |  | Perirectal | 2012 | 269 | 4.21 | 38.7 | GCA_000582255.1 | UD  | UD   |
| 1130196     | <i>A. nosocomialis</i>         | S |  | Sputum     | 2011 | 136 | 4.07 | 38.8 | GCA_000588095.1 | UD  | UD   |
| 1571545     | <i>A. nosocomialis</i>         | S |  | Sputum     | 2012 | 107 | 4.46 | 39.0 | GCA_000682515.1 | UD  | UD   |
| 796380_1375 | <i>A. nosocomialis</i>         | S |  | Perirectal | 2008 | 93  | 4.15 | 38.8 | GCA_000682615.1 | UD  | UD   |
| 21871       | <i>A. nosocomialis</i>         | S |  | Perirectal | 2011 | 102 | 3.91 | 38.6 | GCA_000580675.1 | UD  | UD   |
| 1424608     | <i>A. nosocomialis</i>         | S |  | Sputum     | 2011 | 55  | 3.90 | 38.7 | GCA_000588255.1 | UD  | UD   |
| 766875      | <i>A. nosocomialis</i>         | S |  | Perirectal | 2012 | 66  | 4.02 | 38.8 | GCA_000582055.1 | UD  | UD   |
| 1179249     | <i>A. nosocomialis</i>         | S |  | Sputum     | 2011 | 77  | 3.94 | 38.8 | GCA_000587995.1 | UD  | UD   |

Information for reference strains included in this study

|               |                     |    |  |                 |         |      |      |      |                 |     |         |
|---------------|---------------------|----|--|-----------------|---------|------|------|------|-----------------|-----|---------|
| 1656_2        | <i>A. baumannii</i> | R  |  | Unknown         | ~2004   |      | 4.02 | 39.1 | GCA_000188215.1 | 2   | 423     |
| 3909          | <i>A. baumannii</i> | R  |  | Blood           | 2006    | 236  | 3.95 | 38.9 | GCA_000189695.2 | 78  | 944     |
| 3990          | <i>A. baumannii</i> | R  |  | Unknown         | 2007    | 96   | 4.02 | 38.8 | GCA_000189675.2 | 2   | 437     |
| 4857          | <i>A. baumannii</i> | UD |  | Unknown         | Unknown | 54   | 4.02 | 39.0 | GCA_000241665.2 | 3   | unknown |
| 5075          | <i>A. baumannii</i> | UD |  | Bone infection  | 2009    | 16   | 4.00 | 38.9 | GCA_000241685.2 | 1   | unknown |
| 5256          | <i>A. baumannii</i> | UD |  | Blood           | 2009    | 50   | 4.16 | 39.0 | GCA_000241705.2 | 25  | unknown |
| 5711          | <i>A. baumannii</i> | UD |  | Unknown         | Unknown | 45   | 4.00 | 39.1 | GCA_000241725.2 | 2   | unknown |
| A118          | <i>A. baumannii</i> | UD |  | Blood           | 2010    | 227  | 3.80 | 38.6 | GCA_000186665.1 | 404 | unknown |
| AB0057        | <i>A. baumannii</i> | R  |  | Blood           | 2004    |      | 4.06 | 39.2 | GCA_000021245.1 | 1   | 207     |
| AB056         | <i>A. baumannii</i> | R  |  | Blood           | 2004    | 959  | 3.84 | 39.1 | GCA_000177695.1 | 1   | 207     |
| AB058         | <i>A. baumannii</i> | UD |  | Blood           | 2003    | 1040 | 3.77 | 39.1 | GCA_000177715.1 | 20  | 449     |
| AB059         | <i>A. baumannii</i> | R  |  | Blood           | 2004    | 1062 | 3.91 | 39.2 | GCA_000177735.1 | 1   | 207     |
| AB210         | <i>A. baumannii</i> | UD |  | Unknown         | Unknown | 106  | 4.06 | 38.8 | GCA_000189655.2 | 2   | 218     |
| AB307_0294_NC | <i>A. baumannii</i> | UD |  | Blood           | 1994    |      | 3.76 | 39.0 | GCA_000021145.1 | 1   | 231     |
| 6013113       | <i>A. baumannii</i> | UD |  | Unknown         | Unknown | 118  | 4.00 | 38.9 | GCA_000163375.2 | 81  | unknown |
| 6013150       | <i>A. baumannii</i> | UD |  | Unknown         | Unknown | 202  | 3.99 | 38.9 | GCA_000163355.2 | 81  | unknown |
| 6014059       | <i>A. baumannii</i> | UD |  | Unknown         | Unknown | 143  | 3.88 | 39.0 | GCA_000163395.2 | 2   | unknown |
| AB900         | <i>A. baumannii</i> | UD |  | Skin            | 2003    | 68   | 3.91 | 38.9 | GCA_000173395.1 | 49  | 128     |
| ABNIH1        | <i>A. baumannii</i> | UD |  | unknown         | 2007    | 103  | 3.90 | 39.1 | GCA_000222225.2 | 2   | 281     |
| ABNIH2        | <i>A. baumannii</i> | UD |  | unknown         | 2007    | 125  | 3.94 | 39.1 | GCA_000222245.2 | 2   | 348     |
| ABNIH3        | <i>A. baumannii</i> | UD |  | unknown         | 2007    | 285  | 4.06 | 39.1 | GCA_000222265.2 | 415 | 353     |
| ABNIH4        | <i>A. baumannii</i> | UD |  | unknown         | 2007    | 184  | 3.99 | 39.2 | GCA_000222285.2 | 2   | unknown |
| ACICU         | <i>A. baumannii</i> | R  |  | CSF             | 2005    |      | 4.00 | 38.9 | GCA_000018445.1 | 2   | 437     |
| ATCC17978     | <i>A. baumannii</i> | UD |  | Meninges        | ~1951   |      | 4.01 | 38.9 | GCA_000015425.1 | 437 | 112     |
| ATCC19606     | <i>A. baumannii</i> | UD |  | Urine           | 1911    | 22   | 3.97 | 39.1 | GCA_000162295.1 | 52  | unknown |
| AYE           | <i>A. baumannii</i> | UD |  | Urine           | 2001    |      | 4.05 | 39.3 | GCA_000069245.1 | 1   | 231     |
| BJAB07104     | <i>A. baumannii</i> | UD |  | Blood           | ~2007   |      | 4.04 | 39.0 | GCA_000419385.1 | 2   | 218     |
| BJAB0715      | <i>A. baumannii</i> | R  |  | CSF             | 2007    |      | 4.05 | 38.9 | GCA_000419405.1 | 23  | 642     |
| BJAB0868      | <i>A. baumannii</i> | R  |  | Abdominal fluid | ~2007   |      | 4.01 | 38.9 | GCA_000419425.1 | 2   | 368     |
| D1279779      | <i>A. baumannii</i> | UD |  | Blood           | 2009    |      | 3.71 | 39.0 | GCA_000186665.4 | 267 | 942     |
| MDR_TJ        | <i>A. baumannii</i> | R  |  | Unknown         | 2012    |      | 4.15 | 39.1 | GCA_000187205.4 | 2   | 369     |
| MDR_ZJ06      | <i>A. baumannii</i> | R  |  | Blood           | 2006    |      | 4.01 | 39.0 | GCA_000226275.1 | 2   | 643     |

|             |                          |    |            |               |     |      |      |                 |    |         |
|-------------|--------------------------|----|------------|---------------|-----|------|------|-----------------|----|---------|
| Naval18     | <i>A. baumannii</i>      | UD | Wound      | 2002          | 11  | 4.45 | 38.9 | GCA_000214965.2 | 25 | 993     |
| Naval81     | <i>A. baumannii</i>      | UD | Unknown    | 2006          | 5   | 4.08 | 39.0 | GCA_000214985.2 | 3  | 928     |
| OIFC032     | <i>A. baumannii</i>      | UD | Unknown    | 2003          | 4   | 3.89 | 39.1 | GCA_000215005.2 | 32 | 472     |
| SDF         | <i>A. baumannii</i>      | UD | Body Louse | 2000          | 4   | 3.48 | 39.1 | GCA_000069205.1 | 17 | 137     |
| TCDC_A80715 | <i>A. baumannii</i>      | R  | Unknown    | ~2008         |     | 4.22 | 38.9 | GCA_000189735.2 | 2  | 218     |
| UMB001      | <i>A. baumannii</i>      | R  | Blood      | 2008          | 118 | 4.01 | 39.0 | GCA_000184475.2 | 2  | 349     |
| UMB002      | <i>A. baumannii</i>      | R  | Perirectal | 2008          | 74  | 3.94 | 39.0 | GCA_000184495.2 | 16 | 355     |
| UMB003      | <i>A. baumannii</i>      | UD | Wound      | 2008          | 96  | 4.19 | 39.1 | GCA_000184515.2 | 25 | 229     |
| W6976       | <i>A. baumannii</i>      | UD | Unknown    | Unknown       | 526 | 3.91 | 39.0 | GCA_000248255.2 | 2  | unknown |
| W7282       | <i>A. baumannii</i>      | UD | Unknown    | Unknown       | 133 | 3.95 | 39.0 | GCA_000248275.2 | 2  | 218     |
| WM99c       | <i>A. baumannii</i>      | UD | Sputum     | Unknown       | 162 | 4.04 | 39.1 | GCA_000186645.2 | 2  | 208     |
| ADP1        | <i>A. baylyi</i>         | UD | Soil       | prior to 1958 |     | 3.60 | 40.4 | GCA_000046845.1 | NA | NA      |
| P8_3_8      | <i>Acinetobacter sp.</i> | UD | Unknown    | Unknown       | 204 | 3.89 | 37.6 | GCA_000214135.2 | NA | NA      |
| WJ10621     | <i>A. Iwoffii</i>        | UD | Unknown    | Unknown       |     | 3.18 | 41.6 | GCA_000219275.1 | NA | NA      |
| SH046       | <i>A. johnsonii</i>      | UD | Skin       | 1994          | 47  | 3.69 | 41.3 | GCA_000162055.1 | NA | NA      |
| SH145       | <i>A. Iwoffii</i>        | UD | Skin       | 1994          | 76  | 3.48 | 42.8 | GCA_000162095.1 | NA | NA      |
| SK82        | <i>A. radioresistens</i> | UD | Unknown    | Unknown       | 82  | 3.28 | 41.5 | GCA_000175675.1 | NA | NA      |
| SH164       | <i>A. radioresistens</i> | UD | Skin       | 1994          | 18  | 3.16 | 41.6 | GCA_000162115.1 | NA | NA      |
| ATCC19194   | <i>A. haemolyticus</i>   | UD | Unknown    | Unknown       | 61  | 3.72 | 40.4 | GCA_000164055.1 | NA | NA      |
| NBRC_100985 | <i>Acinetobacter sp.</i> | UD | Unknown    | Unknown       | 67  | 3.52 | 39.0 | GCA_000241225.2 | NA | NA      |
| SH024       | <i>A. pittii</i>         | UD | Skin       | 1993          | 26  | 3.97 | 38.8 | GCA_000163635.1 | NA | NA      |
| 42F         | <i>A. pittii</i>         | UD | Unknown    | Unknown       | 94  | 4.09 | 38.7 | GCA_000529235.1 | NA | NA      |
| DSM_21653   | <i>A. pittii</i>         | UD | Unknown    | Unknown       | 458 | 3.75 | 38.8 | GCA_000248335.2 | NA | NA      |
| PHEA_2      | <i>A. calcoaceticus</i>  | UD | Unknown    | Unknown       |     | 3.86 | 38.8 | GCA_000191145.1 | NA | NA      |
| DR1         | <i>A. oleivorans</i>     | UD | Unknown    | Unknown       |     | 4.15 | 38.7 | GCA_000196795.1 | NA | NA      |
| RUH2202     | <i>A. calcoaceticus</i>  | UD | Wound      | 1980          | 15  | 3.88 | 38.7 | GCA_000162035.1 | NA | NA      |
| M2          | <i>A. nosocomialis</i>   | UD | Unknown    | Unknown       | 11  | 3.78 | 38.7 | GCA_000966505.1 | NA | NA      |
| 28F         | <i>A. nosocomialis</i>   | UD | Unknown    | Unknown       | 138 | 4.19 | 38.7 | GCA_000529215.1 | NA | NA      |
| RUH2624     | <i>A. nosocomialis</i>   | UD | Skin       | 1987          | 8   | 3.95 | 38.8 | GCA_000162375.2 | NA | NA      |

\*UD - undetermined;

**Suppl Table 2. Centroids unique to major phylogroups**

**2A. Centroids found only in *A. baumannii* phylogroup 2**

| <b>Centroid ID</b> | <b>Annotation</b> |
|--------------------|-------------------|
| 993569             | hypothetical      |
| 204780             | hypothetical      |

**2B. Centroids found only in *A. nosocomialis* phylogroup**

| <b>Centroid ID</b> | <b>Annotation</b>         |
|--------------------|---------------------------|
| 772114             | hypothetical              |
| 383015             | hypothetical              |
| 248339             | membrane protein          |
| 599309             | Activator of HSP90 ATPase |
| 515919             | membrane protein          |
| 862333             | hypothetical              |

**2C. Centroids found only in *A. calcoaceticus/pittii* phylogroup**

| <b>Centroid ID</b> | <b>Annotation</b>                  |
|--------------------|------------------------------------|
| 574770             | membrane protein                   |
| 273141             | multidrug DMT transporter permease |
| 450197             | alpha/beta hydrolase               |
| 823841             | hypothetical                       |
| 821936             | metal-dependent hydrolase          |
| 759673             | multidrug DMT transporter permease |
| 844215             | hypothetical                       |
| 301229             | alpha/beta hydrolase               |

**2D. Centroids found only in *A. radioresistans* phylogroup**

| <b>Centroid ID</b> | <b>Annotation</b>                            |
|--------------------|----------------------------------------------|
| 611907             | hypothetical                                 |
| 425605             | cation transporter                           |
| 584694             | hypothetical                                 |
| 423997             | isoprenylcysteine carboxyl methyltransferase |
| 584697             | isoprenylcysteine carboxyl methyltransferase |
| 721698             | cation transporter                           |
| 663891             | cation transporter                           |
| 981560             | hypothetical                                 |



Suppl Table 3a. Centroids found at greater frequency in isolates pre-2009

| Centroid ID | Annotation                                                               | pvalues    | Percent frequency based on <i>A. baumannii</i> phylogroup |           |       |            |            |       |            |             |             |             |
|-------------|--------------------------------------------------------------------------|------------|-----------------------------------------------------------|-----------|-------|------------|------------|-------|------------|-------------|-------------|-------------|
|             |                                                                          |            | Pre2009_A                                                 | Pre2009_P | %Freq | Post2009_A | Post2009_P | %Freq | phylogroup |             |             |             |
|             |                                                                          |            |                                                           |           |       |            |            |       | pre2009    | phylogroup1 | phylogroup2 | phylogroup2 |
| 732954      | conserved hypothetical protein-                                          | 1.14E-07   | 0                                                         | 39        | 100   | 63         | 101        | 62    | 100        | 31          | 100         | 90          |
| 705861      | putative membrane protein-                                               | 7.66E-07   | 1                                                         | 38        | 97    | 67         | 97         | 59    | 88         | 19          | 100         | 98          |
| 120154      | conserved hypothetical protein-                                          | 1.07E-06   | 3                                                         | 36        | 92    | 79         | 85         | 52    | 63         | 5           | 100         | 96          |
| 25117       | mu transposase, C-terminal family protein-                               | 1.07E-06   | 3                                                         | 36        | 92    | 79         | 85         | 52    | 63         | 8           | 100         | 94          |
| 57445       | conserved hypothetical protein-                                          | 1.07E-06   | 3                                                         | 36        | 92    | 79         | 85         | 52    | 63         | 5           | 100         | 96          |
| 760307      | conserved hypothetical protein-                                          | 1.07E-06   | 3                                                         | 36        | 92    | 79         | 85         | 52    | 63         | 5           | 100         | 96          |
| 364436      | conserved hypothetical protein-                                          | 1.29E-06   | 0                                                         | 39        | 100   | 55         | 109        | 66    | 100        | 36          | 100         | 95          |
| 672855      | conserved hypothetical protein-                                          | 1.29E-06   | 0                                                         | 39        | 100   | 55         | 109        | 66    | 100        | 36          | 100         | 95          |
| 407888      | hypothetical protein-                                                    | 1.53E-06   | 21                                                        | 18        | 46    | 147        | 17         | 10    | 0          | 9           | 58          | 12          |
| 230978      | conserved hypothetical protein-                                          | 2.38E-06   | 3                                                         | 36        | 92    | 77         | 87         | 53    | 63         | 6           | 100         | 98          |
| 804733      | AAA domain protein-                                                      | 2.61E-06   | 3                                                         | 36        | 92    | 76         | 88         | 54    | 63         | 8           | 100         | 98          |
| 90541       | conserved hypothetical protein-                                          | 2.61E-06   | 3                                                         | 36        | 92    | 76         | 88         | 54    | 63         | 8           | 100         | 98          |
| 129392      | hypothetical protein-                                                    | 3.74E-06   | 1                                                         | 38        | 97    | 61         | 103        | 63    | 100        | 56          | 97          | 69          |
| 484057      | conserved hypothetical protein-                                          | 5.08E-06   | 26                                                        | 13        | 33    | 156        | 8          | 5     | 0          | 10          | 42          | 10          |
| 229167      | endonuclease L-PSF family protein-                                       | 7.61E-06   | 2                                                         | 37        | 95    | 66         | 98         | 60    | 75         | 18          | 100         | 100         |
| 655085      | putative plasmid mobilization protein MobS-                              | 1.08E-05   | 26                                                        | 13        | 33    | 155        | 9          | 5     | 0          | 3           | 42          | 8           |
| 746119      | conserved hypothetical protein-                                          | 1.42E-05   | 20                                                        | 19        | 49    | 140        | 24         | 15    | 38         | 20          | 52          | 10          |
| 448335      | conserved hypothetical protein-                                          | 1.56E-05   | 2                                                         | 37        | 95    | 64         | 100        | 61    | 75         | 25          | 100         | 95          |
| 794521      | bacterial Ig-like domain family protein-                                 | 1.62E-05   | 1                                                         | 38        | 97    | 56         | 108        | 66    | 88         | 30          | 100         | 100         |
| 49604       | putative phage transcriptional regulator-                                | 1.68E-05   | 24                                                        | 15        | 38    | 150        | 14         | 9     | 0          | 4           | 48          | 13          |
| 533691      | peptidase S24-like family protein-                                       | 1.68E-05   | 24                                                        | 15        | 38    | 150        | 14         | 9     | 0          | 4           | 48          | 13          |
| 692442      | tsnA endonuclease N terminal family protein-                             | 1.73E-05   | 4                                                         | 35        | 90    | 76         | 88         | 54    | 63         | 8           | 97          | 98          |
| 705974      | fimbrial protein-                                                        | 1.80E-05   | 14                                                        | 25        | 64    | 121        | 43         | 26    | 0          | 3           | 81          | 49          |
| 159272      | putative lipoprotein-                                                    | 2.10E-05   | 5                                                         | 34        | 87    | 82         | 82         | 50    | 63         | 19          | 94          | 80          |
| 637764      | conserved hypothetical protein-                                          | 2.71E-05   | 3                                                         | 36        | 92    | 68         | 96         | 59    | 63         | 19          | 100         | 96          |
| 101037      | type I secretion C-terminal target domain protein-                       | 3.20E-05   | 2                                                         | 37        | 95    | 62         | 102        | 62    | 75         | 24          | 100         | 99          |
| 175329      | conserved hypothetical protein-                                          | 3.20E-05   | 2                                                         | 37        | 95    | 62         | 102        | 62    | 75         | 23          | 100         | 100         |
| 756759      | tetratricopeptide repeat family protein-                                 | 3.20E-05   | 2                                                         | 37        | 95    | 62         | 102        | 62    | 88         | 24          | 97          | 99          |
| 612306      | conserved hypothetical protein-                                          | 3.22E-05   | 1                                                         | 38        | 97    | 54         | 110        | 67    | 88         | 36          | 100         | 96          |
| 393342      | conserved hypothetical protein-                                          | 3.57E-05   | 4                                                         | 35        | 90    | 74         | 90         | 55    | 63         | 21          | 97          | 87          |
| 743414      | conserved hypothetical protein-                                          | 4.21E-05   | 28                                                        | 11        | 28    | 157        | 7          | 4     | 0          | 1           | 35          | 7           |
| 151146      | putative dNA replication protein-                                        | 4.95E-05   | 20                                                        | 19        | 38    | 148        | 16         | 10    | 25         | 11          | 42          | 8           |
| 268871      | hypothetical protein-                                                    | 5.40E-05   | 19                                                        | 20        | 51    | 134        | 30         | 18    | 0          | 0           | 65          | 36          |
| 464545      | putative membrane protein-                                               | 5.40E-05   | 19                                                        | 20        | 51    | 134        | 30         | 18    | 0          | 0           | 65          | 36          |
| 514726      | conserved hypothetical protein-                                          | 5.40E-05   | 5                                                         | 34        | 87    | 77         | 87         | 53    | 63         | 6           | 94          | 98          |
| 139247      | conserved hypothetical protein-                                          | 6.18E-05   | 25                                                        | 14        | 36    | 150        | 14         | 9     | 0          | 4           | 45          | 13          |
| 797597      | conserved hypothetical protein-                                          | 6.18E-05   | 25                                                        | 14        | 36    | 150        | 14         | 9     | 0          | 4           | 45          | 13          |
| 452165      | haemagglutinin family protein-                                           | 6.96E-05   | 1                                                         | 38        | 97    | 50         | 114        | 70    | 88         | 45          | 100         | 93          |
| 750255      | putative TonB-dependent receptor domain protein-                         | 6.98E-05   | 22                                                        | 17        | 44    | 142        | 22         | 13    | 38         | 19          | 45          | 8           |
| 532471      | POTRA domain, SH1B-type family protein-                                  | 7.09E-05   | 9                                                         | 30        | 77    | 96         | 68         | 41    | 0          | 5           | 97          | 76          |
| 533180      | conserved hypothetical protein-                                          | 7.44E-05   | 4                                                         | 35        | 90    | 71         | 93         | 57    | 63         | 11          | 97          | 100         |
| 382490      | conserved hypothetical protein-                                          | 7.58E-05   | 8                                                         | 31        | 79    | 91         | 73         | 45    | 0          | 10          | 100         | 87          |
| 494561      | antitoxin of toxin-antitoxin stability system N-terminal family protein- | 7.58E-05   | 8                                                         | 31        | 79    | 91         | 73         | 45    | 0          | 10          | 100         | 87          |
| 236606      | conserved hypothetical protein-                                          | 8.11E-05   | 24                                                        | 15        | 38    | 147        | 17         | 10    | 9          | 15          | 48          | 12          |
| 390228      | initiator Replication family protein-                                    | 8.11E-05   | 24                                                        | 15        | 38    | 147        | 17         | 10    | 13         | 13          | 45          | 8           |
| 526355      | initiator Replication family protein-                                    | 8.11E-05   | 24                                                        | 15        | 38    | 147        | 17         | 10    | 13         | 13          | 45          | 8           |
| 445585      | conserved hypothetical protein-                                          | 8.58E-05   | 18                                                        | 21        | 54    | 130        | 34         | 21    | 0          | 4           | 68          | 37          |
| 80566       | conserved hypothetical protein-                                          | 8.58E-05   | 18                                                        | 21        | 54    | 130        | 34         | 21    | 0          | 4           | 68          | 37          |
| 173547      | putative transmembrane protein-                                          | 0.00012431 | 2                                                         | 37        | 95    | 57         | 107        | 65    | 75         | 29          | 100         | 100         |
| 722277      | autotransporter beta domain protein-                                     | 0.00012431 | 2                                                         | 37        | 95    | 57         | 107        | 65    | 75         | 29          | 100         | 100         |
| 533394      | putative membrane protein-                                               | 0.00012566 | 2                                                         | 37        | 95    | 56         | 108        | 66    | 75         | 30          | 100         | 100         |
| 270847      | nuclear pore complex subunit Nro1 family protein-                        | 0.00012768 | 26                                                        | 13        | 33    | 151        | 13         | 8     | 0          | 8           | 42          | 8           |
| 171360      | conserved hypothetical protein-                                          | 0.00012955 | 24                                                        | 15        | 38    | 146        | 18         | 11    | 13         | 10          | 45          | 12          |
| 617879      | istB-like ATP binding family protein-                                    | 0.00012955 | 24                                                        | 15        | 38    | 146        | 18         | 11    | 13         | 10          | 45          | 12          |
| 262226      | conserved hypothetical protein-                                          | 0.00013297 | 21                                                        | 18        | 46    | 138        | 26         | 16    | 38         | 21          | 48          | 11          |
| 452043      | conserved hypothetical protein-                                          | 0.00013742 | 2                                                         | 37        | 95    | 55         | 109        | 66    | 75         | 33          | 100         | 99          |
| 624284      | initiator Replication family protein-                                    | 0.0001498  | 27                                                        | 12        | 31    | 153        | 11         | 7     | 0          | 6           | 39          | 7           |
| 184498      | 3-beta hydroxysteroid dehydrogenase/isomerase family protein-            | 0.00015547 | 17                                                        | 22        | 56    | 125        | 39         | 24    | 0          | 9           | 71          | 38          |
| 529248      | rmID substrate binding domain protein-                                   | 0.00015547 | 17                                                        | 22        | 56    | 125        | 39         | 24    | 0          | 9           | 71          | 38          |
| 55120       | UDP-N-acetylglucosamine 2-epimerase-                                     | 0.00015547 | 17                                                        | 22        | 56    | 125        | 39         | 24    | 0          | 9           | 71          | 38          |
| 604474      | 3-beta hydroxysteroid dehydrogenase/isomerase family protein-            | 0.00015547 | 17                                                        | 22        | 56    | 125        | 39         | 24    | 0          | 9           | 71          | 38          |
| 651024      | rmID substrate binding domain protein-                                   | 0.00015547 | 17                                                        | 22        | 56    | 125        | 39         | 24    | 0          | 9           | 71          | 38          |
| 707637      | 3-beta hydroxysteroid dehydrogenase/isomerase family protein-            | 0.00015547 | 17                                                        | 22        | 56    | 125        | 39         | 24    | 0          | 9           | 71          | 38          |
| 719215      | 3-beta hydroxysteroid dehydrogenase/isomerase family protein-            | 0.00015547 | 17                                                        | 22        | 56    | 125        | 39         | 24    | 0          | 9           | 71          | 38          |
| 13943       | putative dNA replication protein-                                        | 0.00016898 | 25                                                        | 14        | 36    | 148        | 16         | 10    | 25         | 11          | 39          | 8           |
| 444392      | conserved hypothetical protein-                                          | 0.00017997 | 19                                                        | 20        | 51    | 131        | 33         | 20    | 25         | 21          | 58          | 19          |
| 120545      | HI933-like family protein-                                               | 0.00020011 | 3                                                         | 36        | 92    | 62         | 102        | 62    | 63         | 23          | 100         | 100         |
| 219455      | saccharopine dehydrogenase family protein-                               | 0.00020011 | 3                                                         | 36        | 92    | 62         | 102        | 62    | 63         | 23          | 100         | 100         |
| 363161      | putative membrane protein-                                               | 0.00020011 | 3                                                         | 36        | 92    | 62         | 102        | 62    | 75         | 23          | 97          | 100         |
| 409437      | putative membrane protein-                                               | 0.00020011 | 3                                                         | 36        | 92    | 62         | 102        | 62    | 75         | 23          | 97          | 100         |
| 570885      | bacterial regulatory, tetr family protein-                               | 0.00020011 | 3                                                         | 36        | 92    | 62         | 102        | 62    | 63         | 23          | 100         | 100         |
| 613122      | putative membrane protein-                                               | 0.00020011 | 3                                                         | 36        | 92    | 62         | 102        | 62    | 63         | 23          | 97          | 100         |
| 700856      | HI933-like family protein-                                               | 0.00020011 | 3                                                         | 36        | 92    | 62         | 102        | 62    | 63         | 23          | 100         | 100         |
| 729735      | conserved hypothetical protein-                                          | 0.00020011 | 3                                                         | 36        | 92    | 62         | 102        | 62    | 75         | 23          | 97          | 100         |
| 374387      | FAD dependent oxidoreductase family protein-                             | 0.00020142 | 3                                                         | 36        | 92    | 61         | 103        | 63    | 63         | 24          | 100         | 100         |
| 443886      | conserved hypothetical protein-                                          | 0.00021324 | 26                                                        | 13        | 33    | 150        | 14         | 9     | 0          | 4           | 42          | 13          |
| 629771      | conserved hypothetical protein-                                          | 0.00021324 | 26                                                        | 13        | 33    | 150        | 14         | 9     | 0          | 4           | 42          | 13          |
| 225370      | bacterial Ig-like domain family protein-                                 | 0.00023513 | 2                                                         | 37        | 95    | 54         | 110        | 67    | 88         | 34          | 97          | 99          |
| 522766      | amidohydrolase family protein-                                           | 0.00024722 | 2                                                         | 37        | 95    | 53         | 111        | 68    | 88         | 60          | 97          | 75          |
| 274019      | zonular occludens toxin family protein-                                  | 0.00025115 | 20                                                        | 19        | 49    | 134        | 30         | 18    | 0          | 0           | 61          | 36          |
| 692696      | conserved hypothetical protein-                                          | 0.00027263 | 22                                                        | 17        | 44    | 139        | 25         | 15    | 38         | 20          | 45          | 11          |
| 19466       | type I secretion C-terminal target domain protein-                       | 0.00028759 | 9                                                         | 30        | 77    | 92         | 72         | 44    | 0          | 3           | 97          | 83          |
| 431284      | phosphoadenosine phosphosulfate reductase family protein-                | 0.00030948 | 8                                                         | 31        | 79    | 86         | 78         | 48    | 0          | 10          | 100         | 93          |
| 156422      | carbapenem-associated resistance domain protein-                         | 0.00036697 | 5                                                         | 34        | 87    | 71         | 93         | 57    | 38         | 13          | 100         | 99          |
| 127082      | conserved hypothetical protein-                                          | 0.00037515 | 3                                                         | 36        | 92    | 59         | 105        | 64    | 75         | 26          | 97          | 100         |
| 758969      | RHS repeat-associated core domain protein-                               | 0.00038259 | 5                                                         | 34        | 87    | 70         | 94         | 57    | 75         | 14          | 90          | 99          |
| 805407      | RHS repeat-associated core domain protein-                               | 0.00038259 | 5                                                         | 34        | 87    | 70         | 94         | 57    | 75         | 14          | 90          | 99          |
| 358828      | phage T7 tail fibre family protein-                                      | 0.00042462 | 1                                                         | 38        | 97    | 44         | 120        | 73    | 88         | 49          | 100         | 96          |
| 224227      | isochorismatase family protein-                                          | 0.00043864 | 2                                                         | 37        | 95    | 52         | 112        | 68    | 88         | 60          | 97          | 76          |
| 303845      | lysR substrate binding domain protein-                                   | 0.00043864 | 2                                                         | 37        | 95    | 52         | 112        | 68    | 88         | 60          | 97          | 76          |
| 572242      | antibiotic biosynthesis monooxygenase family protein-                    | 0.00043864 | 2                                                         | 37        | 95    | 52         | 112        | 68    | 88         | 60          | 97          | 76          |
| 155892      | putative membrane protein-                                               | 0.00044449 | 6                                                         | 33        | 85    | 76         | 88         | 54    | 63         | 8           | 90          | 98          |
| 649314      | KR domain protein-                                                       | 0.00044889 | 1                                                         | 38        | 97    | 43         | 121        | 74    | 88         | 48          | 100         | 99          |
| 66350       | acetyl xylan esterase family protein-                                    | 0.00044889 | 1                                                         | 38        | 97    | 43         | 121        | 74    | 88         | 48          | 100         | 99          |
| 33850       | conserved hypothetical protein-                                          | 0.00045407 | 6                                                         | 33        | 85    | 75         | 89         | 54    | 63         | 21          | 90          | 86          |
| 747584      | putative membrane protein-                                               | 0.00046994 | 14                                                        | 25        | 64    | 110        | 54         | 33    | 0          | 3           | 81          | 62          |
| 163263      | cation diffusion facilitator transporter family protein-                 | 0.00050115 | 17                                                        | 22        | 56    | 121        | 43         | 26    | 0          | 9           | 71          | 43          |
| 549463      | conserved hypothetical protein-                                          | 0.0005356  | 0                                                         | 39        | 100   | 34         | 130        | 79    | 100        | 58          | 100         | 100         |
| 552193      | putative pilus subunit FliA-                                             | 0.0005356  | 0                                                         | 39        | 100   | 34         | 130        | 79    | 100        | 59          | 100         | 99          |
| 427917      | tonB-dependent siderophore receptor family protein-                      | 0.00054256 | 7                                                         | 32        | 82    | 79         | 85         | 52    | 13         | 4           | 100         | 98          |
| 22324       | ribD C-terminal domain protein-                                          | 0.00055548 | 8                                                         | 31        | 79    | 85         | 79         | 48    | 0          | 11          | 100         | 83          |
| 604279      | ribD C-terminal domain protein-                                          | 0.00055548 | 8                                                         | 31        | 79    | 85         | 79         | 48    | 0          | 11          | 100         | 83          |
| 266443      | conserved hypothetical protein-                                          | 0.00056278 | 0                                                         | 39        | 100   | 33         | 131        | 80    | 100        | 59          | 100         | 100         |
| 777803      | conserved hypothetical protein-                                          | 0.00056278 | 0                                                         | 39        | 100   | 33         | 131        | 80    | 100        | 59          | 100         | 100         |
| 541836      | carboxymuconolactone decarboxylase family protein-                       | 0.00056389 | 0                                                         | 39        | 100   | 35         | 129        | 79    | 100        | 56          | 100         | 100         |
| 436290      | conserved hypothetical protein-                                          | 0.00058575 | 21                                                        | 18        | 46    | 134        | 30         | 18    | 0          | 0           | 58          | 36          |
| 499299      | type I secretion C-terminal target domain protein-                       | 0.00060999 | 12                                                        | 27        | 69    | 191        | 63         | 38    | 15         | 77          | 61          | 61          |
| 766196      | type I secretion C-terminal target domain protein-                       | 0.00061492 | 16                                                        | 23        | 59    | 117        | 47         | 29    | 50         | 9           | 61          | 48          |
| 519171      | conserved hypothetical protein-                                          | 0.00062764 | 8                                                         | 31        | 7     |            |            |       |            |             |             |             |

|        |                                                                            |            |    |    |     |     |     |    |     |    |     |     |
|--------|----------------------------------------------------------------------------|------------|----|----|-----|-----|-----|----|-----|----|-----|-----|
| 50993  | outer membrane beta-barrel domain protein-                                 | 0.00069301 | 5  | 34 | 87  | 69  | 95  | 58 | 38  | 16 | 100 | 98  |
| 174334 | efflux transporter, outer membrane factor (OMF) lipo, NodT family protein- | 0.00069767 | 3  | 36 | 92  | 56  | 108 | 66 | 63  | 31 | 100 | 99  |
| 727321 | bacterial Ig-like domain family protein-                                   | 0.00069767 | 3  | 36 | 92  | 56  | 108 | 66 | 68  | 33 | 94  | 98  |
| 755119 | outer membrane transport family protein-                                   | 0.00069767 | 3  | 36 | 92  | 56  | 108 | 66 | 63  | 31 | 100 | 99  |
| 806950 | conserved hypothetical protein-                                            | 0.00073404 | 15 | 24 | 62  | 113 | 51  | 31 | 0   | 3  | 77  | 58  |
| 161833 | conserved hypothetical protein-                                            | 0.00074645 | 3  | 36 | 92  | 55  | 109 | 66 | 88  | 58 | 94  | 75  |
| 195547 | putative membrane protein-                                                 | 0.00074645 | 3  | 36 | 92  | 55  | 109 | 66 | 63  | 31 | 100 | 100 |
| 238887 | pyridine nucleotide-disulfide oxidoreductase family protein-               | 0.00074645 | 3  | 36 | 92  | 55  | 109 | 66 | 63  | 31 | 100 | 100 |
| 705873 | pyridine nucleotide-disulfide oxidoreductase family protein-               | 0.00074645 | 3  | 36 | 92  | 55  | 109 | 66 | 63  | 31 | 100 | 100 |
| 144114 | tetratricopeptide repeat family protein-                                   | 0.00079686 | 2  | 37 | 95  | 49  | 115 | 70 | 88  | 40 | 97  | 99  |
| 40734  | conserved hypothetical protein-                                            | 0.00079686 | 2  | 37 | 95  | 49  | 115 | 70 | 75  | 39 | 100 | 100 |
| 435934 | putative gp77-                                                             | 0.00079686 | 2  | 37 | 95  | 49  | 115 | 70 | 75  | 45 | 100 | 94  |
| 606234 | tetratricopeptide repeat family protein-                                   | 0.00079686 | 2  | 37 | 95  | 49  | 115 | 70 | 88  | 40 | 97  | 99  |
| 243670 | proton antiporter-2 family protein-                                        | 0.00081306 | 2  | 37 | 95  | 50  | 114 | 70 | 88  | 63 | 97  | 76  |
| 171756 | conserved hypothetical protein-                                            | 0.00082388 | 26 | 13 | 33  | 147 | 17  | 10 | 0   | 8  | 42  | 13  |
| 301290 | bacterial transferase hexapeptide family protein-                          | 0.00093735 | 22 | 17 | 44  | 136 | 28  | 17 | 0   | 1  | 55  | 32  |
| 428297 | glycosyl transferase 4 family protein-                                     | 0.00093735 | 22 | 17 | 44  | 136 | 28  | 17 | 0   | 1  | 55  | 32  |
| 806666 | 3-beta hydroxysteroid dehydrogenase/isomerase family protein-              | 0.00093735 | 22 | 17 | 44  | 136 | 28  | 17 | 0   | 1  | 55  | 32  |
| 138471 | PAAR motif family protein-                                                 | 0.0009531  | 6  | 33 | 85  | 71  | 93  | 57 | 25  | 15 | 100 | 96  |
| 156827 | conserved hypothetical protein-                                            | 0.00096565 | 7  | 32 | 82  | 78  | 86  | 52 | 63  | 8  | 87  | 95  |
| 533099 | conserved hypothetical protein-                                            | 0.00096565 | 7  | 32 | 82  | 78  | 86  | 52 | 13  | 3  | 100 | 100 |
| 336934 | conserved hypothetical protein-                                            | 0.0009735  | 0  | 39 | 100 | 32  | 132 | 80 | 100 | 60 | 100 | 100 |
| 370733 | outer membrane beta barrel domain protein-                                 | 0.0009735  | 0  | 39 | 100 | 32  | 132 | 80 | 100 | 61 | 100 | 99  |
| 456673 | conserved hypothetical protein-                                            | 0.0009932  | 0  | 39 | 100 | 31  | 133 | 81 | 100 | 61 | 100 | 100 |
| 466874 | conserved hypothetical protein-                                            | 0.0009932  | 0  | 39 | 100 | 31  | 133 | 81 | 100 | 61 | 100 | 100 |
| 631297 | conserved hypothetical protein-                                            | 0.0009932  | 0  | 39 | 100 | 31  | 133 | 81 | 100 | 61 | 100 | 100 |
| 667923 | conserved hypothetical protein-                                            | 0.0009932  | 0  | 39 | 100 | 31  | 133 | 81 | 100 | 61 | 100 | 100 |
| 692510 | conserved hypothetical protein-                                            | 0.0009932  | 0  | 39 | 100 | 31  | 133 | 81 | 100 | 61 | 100 | 100 |
| 724755 | conserved hypothetical protein-                                            | 0.0009932  | 0  | 39 | 100 | 31  | 133 | 81 | 100 | 61 | 100 | 100 |
| 732300 | conserved hypothetical protein-                                            | 0.0009932  | 0  | 39 | 100 | 31  | 133 | 81 | 100 | 61 | 100 | 100 |

Suppl Table 3b. Centroids found at greater frequency in isolates post-2009

| Centroid ID | Annotation                                   | pvalues    | Pre2009_A | Pre2009_P | %Freq | Post2009_A | Post2009_P | %Freq | Percent frequency based on <i>A. baumannii</i> phylogroup |             |             |             |
|-------------|----------------------------------------------|------------|-----------|-----------|-------|------------|------------|-------|-----------------------------------------------------------|-------------|-------------|-------------|
|             |                                              |            |           |           |       |            |            |       | phylogroup1                                               | phylogroup1 | Phylogroup2 | phylogroup2 |
|             |                                              |            |           |           |       |            |            |       | pre2009                                                   | post2009    | pre2009     | post2009    |
| 788509      | conserved hypothetical protein-              | 3.77E-06   | 37        | 2         | 5     | 96         | 68         | 41    | 25                                                        | 85          | 0           | 0           |
| 120321      | conserved hypothetical protein-              | 1.21E-05   | 39        | 0         | 0     | 117        | 47         | 29    | 0                                                         | 59          | 0           | 0           |
| 139530      | conserved hypothetical protein-              | 1.21E-05   | 39        | 0         | 0     | 117        | 47         | 29    | 0                                                         | 59          | 0           | 0           |
| 150134      | conserved hypothetical protein-              | 1.21E-05   | 39        | 0         | 0     | 117        | 47         | 29    | 0                                                         | 59          | 0           | 0           |
| 686832      | hypothetical protein-                        | 1.21E-05   | 39        | 0         | 0     | 117        | 47         | 29    | 0                                                         | 59          | 0           | 0           |
| 801110      | conserved hypothetical protein-              | 3.22E-05   | 38        | 1         | 3     | 110        | 54         | 33    | 13                                                        | 68          | 0           | 0           |
| 323101      | phage integrase family protein-              | 4.44E-05   | 39        | 0         | 0     | 120        | 44         | 27    | 0                                                         | 55          | 0           | 0           |
| 390190      | conserved hypothetical protein-              | 6.39E-05   | 38        | 1         | 3     | 113        | 51         | 31    | 13                                                        | 64          | 0           | 0           |
| 149427      | pyocin activator PrtN family protein-        | 8.32E-05   | 39        | 0         | 0     | 123        | 41         | 25    | 0                                                         | 51          | 0           | 0           |
| 203405      | pyocin activator PrtN family protein-        | 8.32E-05   | 39        | 0         | 0     | 123        | 41         | 25    | 0                                                         | 51          | 0           | 0           |
| 139016      | conserved hypothetical protein-              | 0.00012566 | 37        | 2         | 5     | 108        | 56         | 34    | 25                                                        | 70          | 0           | 0           |
| 139711      | phage/plasmid-like TIGR03299 family protein- | 0.00012566 | 37        | 2         | 5     | 108        | 56         | 34    | 25                                                        | 70          | 0           | 0           |
| 142772      | phage/plasmid-like TIGR03299 family protein- | 0.00012566 | 37        | 2         | 5     | 108        | 56         | 34    | 25                                                        | 70          | 0           | 0           |
| 200431      | phage/plasmid-like TIGR03299 family protein- | 0.00012566 | 37        | 2         | 5     | 108        | 56         | 34    | 25                                                        | 70          | 0           | 0           |
| 21645       | phage/plasmid-like TIGR03299 family protein- | 0.00012566 | 37        | 2         | 5     | 108        | 56         | 34    | 25                                                        | 70          | 0           | 0           |
| 254669      | phage/plasmid-like TIGR03299 family protein- | 0.00012566 | 37        | 2         | 5     | 108        | 56         | 34    | 25                                                        | 70          | 0           | 0           |
| 317769      | phage/plasmid-like TIGR03299 family protein- | 0.00012566 | 37        | 2         | 5     | 108        | 56         | 34    | 25                                                        | 70          | 0           | 0           |
| 320036      | phage/plasmid-like TIGR03299 family protein- | 0.00012566 | 37        | 2         | 5     | 108        | 56         | 34    | 25                                                        | 70          | 0           | 0           |
| 320108      | phage/plasmid-like TIGR03299 family protein- | 0.00012566 | 37        | 2         | 5     | 108        | 56         | 34    | 25                                                        | 70          | 0           | 0           |
| 413677      | phage/plasmid-like TIGR03299 family protein- | 0.00012566 | 37        | 2         | 5     | 108        | 56         | 34    | 25                                                        | 70          | 0           | 0           |
| 474876      | phage/plasmid-like TIGR03299 family protein- | 0.00012566 | 37        | 2         | 5     | 108        | 56         | 34    | 25                                                        | 70          | 0           | 0           |
| 510057      | phage/plasmid-like TIGR03299 family protein- | 0.00012566 | 37        | 2         | 5     | 108        | 56         | 34    | 25                                                        | 70          | 0           | 0           |
| 518459      | phage/plasmid-like TIGR03299 family protein- | 0.00012566 | 37        | 2         | 5     | 108        | 56         | 34    | 25                                                        | 70          | 0           | 0           |
| 577791      | phage/plasmid-like TIGR03299 family protein- | 0.00012566 | 37        | 2         | 5     | 108        | 56         | 34    | 25                                                        | 70          | 0           | 0           |
| 598705      | phage/plasmid-like TIGR03299 family protein- | 0.00012566 | 37        | 2         | 5     | 108        | 56         | 34    | 25                                                        | 70          | 0           | 0           |
| 600142      | phage/plasmid-like TIGR03299 family protein- | 0.00012566 | 37        | 2         | 5     | 108        | 56         | 34    | 25                                                        | 70          | 0           | 0           |
| 629707      | phage/plasmid-like TIGR03299 family protein- | 0.00012566 | 37        | 2         | 5     | 108        | 56         | 34    | 25                                                        | 70          | 0           | 0           |
| 629795      | conserved hypothetical protein-              | 0.00012566 | 37        | 2         | 5     | 108        | 56         | 34    | 25                                                        | 70          | 0           | 0           |
| 630529      | phage/plasmid-like TIGR03299 family protein- | 0.00012566 | 37        | 2         | 5     | 108        | 56         | 34    | 25                                                        | 70          | 0           | 0           |
| 645597      | phage/plasmid-like TIGR03299 family protein- | 0.00012566 | 37        | 2         | 5     | 108        | 56         | 34    | 25                                                        | 70          | 0           | 0           |
| 688215      | phage/plasmid-like TIGR03299 family protein- | 0.00012566 | 37        | 2         | 5     | 108        | 56         | 34    | 25                                                        | 70          | 0           | 0           |
| 717436      | phage/plasmid-like TIGR03299 family protein- | 0.00012566 | 37        | 2         | 5     | 108        | 56         | 34    | 25                                                        | 70          | 0           | 0           |
| 788737      | phage/plasmid-like TIGR03299 family protein- | 0.00012566 | 37        | 2         | 5     | 108        | 56         | 34    | 25                                                        | 70          | 0           | 0           |
| 802053      | phage/plasmid-like TIGR03299 family protein- | 0.00012566 | 37        | 2         | 5     | 108        | 56         | 34    | 25                                                        | 70          | 0           | 0           |
| 85102       | phage/plasmid-like TIGR03299 family protein- | 0.00012566 | 37        | 2         | 5     | 108        | 56         | 34    | 25                                                        | 70          | 0           | 0           |
| 565750      | conserved hypothetical protein-              | 0.00012723 | 38        | 1         | 3     | 116        | 48         | 29    | 13                                                        | 60          | 0           | 0           |
| 149428      | conserved hypothetical protein-              | 0.00029362 | 39        | 0         | 0     | 128        | 36         | 22    | 0                                                         | 45          | 0           | 0           |
| 166200      | conserved hypothetical protein-              | 0.00029362 | 39        | 0         | 0     | 128        | 36         | 22    | 0                                                         | 45          | 0           | 0           |
| 176128      | conserved hypothetical protein-              | 0.00029362 | 39        | 0         | 0     | 128        | 36         | 22    | 0                                                         | 45          | 0           | 0           |
| 177146      | conserved hypothetical protein-              | 0.00029362 | 39        | 0         | 0     | 128        | 36         | 22    | 0                                                         | 45          | 0           | 0           |
| 626678      | mreB/Mbl family protein-                     | 0.00029362 | 39        | 0         | 0     | 128        | 36         | 22    | 0                                                         | 45          | 0           | 0           |
| 407666      | conserved hypothetical protein-              | 0.00029947 | 39        | 0         | 0     | 127        | 37         | 23    | 0                                                         | 46          | 0           | 0           |
| 500376      | RHS Repeat family protein-                   | 0.00029947 | 39        | 0         | 0     | 127        | 37         | 23    | 0                                                         | 46          | 0           | 0           |
| 200613      | phage/plasmid-like TIGR03299 family protein- | 0.00044442 | 37        | 2         | 5     | 113        | 51         | 31    | 25                                                        | 64          | 0           | 0           |
| 505768      | conserved hypothetical protein-              | 0.00045742 | 7         | 32        | 82    | 3          | 161        | 98    | 75                                                        | 96          | 84          | 100         |
| 324341      | putative membrane protein-                   | 0.0005356  | 39        | 0         | 0     | 130        | 34         | 21    | 0                                                         | 43          | 0           | 0           |
| 590889      | putative membrane protein-                   | 0.0005356  | 39        | 0         | 0     | 130        | 34         | 21    | 0                                                         | 43          | 0           | 0           |
| 600575      | RHS repeat-associated core domain protein-   | 0.0005356  | 39        | 0         | 0     | 130        | 34         | 21    | 0                                                         | 43          | 0           | 0           |
| 142526      | conserved hypothetical protein-              | 0.00056389 | 39        | 0         | 0     | 129        | 35         | 21    | 0                                                         | 44          | 0           | 0           |
| 213983      | conserved hypothetical protein-              | 0.00056389 | 39        | 0         | 0     | 129        | 35         | 21    | 0                                                         | 44          | 0           | 0           |
| 455261      | conserved hypothetical protein-              | 0.00056389 | 39        | 0         | 0     | 129        | 35         | 21    | 0                                                         | 44          | 0           | 0           |
| 536087      | conserved hypothetical protein-              | 0.00056389 | 39        | 0         | 0     | 129        | 35         | 21    | 0                                                         | 44          | 0           | 0           |
| 227499      | trehalose-phosphatase-                       | 0.00059195 | 8         | 31        | 79    | 5          | 159        | 97    | 88                                                        | 96          | 77          | 98          |
| 336354      | conserved hypothetical protein-              | 0.00079029 | 38        | 1         | 3     | 123        | 41         | 25    | 0                                                         | 24          | 3           | 26          |
| 593129      | alpha/beta hydrolase family protein-         | 0.00079029 | 38        | 1         | 3     | 123        | 41         | 25    | 13                                                        | 51          | 0           | 0           |
| 660375      | conserved hypothetical protein-              | 0.00079029 | 38        | 1         | 3     | 123        | 41         | 25    | 0                                                         | 24          | 3           | 26          |
| 340301      | phage integrase family protein-              | 0.0009735  | 39        | 0         | 0     | 132        | 32         | 20    | 0                                                         | 19          | 0           | 20          |
| 474136      | conserved hypothetical protein-              | 0.0009735  | 39        | 0         | 0     | 132        | 32         | 20    | 0                                                         | 40          | 0           | 0           |
| 585679      | phage integrase family protein-              | 0.0009735  | 39        | 0         | 0     | 132        | 32         | 20    | 0                                                         | 19          | 0           | 20          |
| 198594      | peptidase S24-like family protein-           | 0.0009932  | 39        | 0         | 0     | 133        | 31         | 19    | 0                                                         | 34          | 0           | 5           |
| 250478      | peptidase S24-like family protein-           | 0.0009932  | 39        | 0         | 0     | 133        | 31         | 19    | 0                                                         | 34          | 0           | 5           |
| 263194      | peptidase S24-like family protein-           | 0.0009932  | 39        | 0         | 0     | 133        | 31         | 19    | 0                                                         | 34          | 0           | 5           |
| 308576      | peptidase S24-like family protein-           | 0.0009932  | 39        | 0         | 0     | 133        | 31         | 19    | 0                                                         | 34          | 0           | 5           |
| 3767        | peptidase S24-like family protein-           | 0.0009932  | 39        | 0         | 0     | 133        | 31         | 19    | 0                                                         | 34          | 0           | 5           |
| 407809      | RHS repeat-associated core domain protein-   | 0.0009932  | 39        | 0         | 0     | 133        | 31         | 19    | 0                                                         | 39          | 0           | 0           |
| 528030      | peptidase S24-like family protein-           | 0.0009932  | 39        | 0         | 0     | 133        | 31         | 19    | 0                                                         | 34          | 0           | 5           |
| 725153      | peptidase S24-like family protein-           | 0.0009932  | 39        | 0         | 0     | 133        | 31         | 19    | 0                                                         | 34          | 0           | 5           |
| 730452      | peptidase S24-like family protein-           | 0.0009932  | 39        | 0         | 0     | 133        | 31         | 19    | 0                                                         | 34          | 0           | 5           |

Suppl Table 4a. Centroids found at greater frequency in Sputum genomes

| Centroid ID | Annotation                                         | Perirectal_A | Perirectal_P | % Frequency | Sputum_A | Sputum_P | % Frequency |
|-------------|----------------------------------------------------|--------------|--------------|-------------|----------|----------|-------------|
| 628364      | flagellar system-associated repeat family protein- | 44           | 80           | 65          | 6        | 73       | 92          |
| 800888      | transposase IS66 family protein-                   | 48           | 76           | 61          | 8        | 71       | 90          |
| 254584      | transposase IS66 family protein-                   | 47           | 77           | 62          | 8        | 71       | 90          |
| 781623      | transposase IS66 family protein-                   | 47           | 77           | 62          | 8        | 71       | 90          |
| 657652      | flagellar system-associated repeat family protein- | 38           | 86           | 69          | 5        | 74       | 94          |
| 355727      | cell wall-associated hydrolase family protein-     | 36           | 88           | 71          | 4        | 75       | 95          |
| 28391       | integron integrase family protein-                 | 77           | 47           | 38          | 25       | 54       | 68          |
| 569430      | class 1 integrase domain protein-                  | 77           | 47           | 38          | 25       | 54       | 68          |
| 170895      | tonB dependent receptor family protein-            | 66           | 58           | 47          | 19       | 60       | 76          |
| 780379      | flagellar system-associated repeat family protein- | 56           | 68           | 55          | 14       | 65       | 82          |
| 40390       | type I secretion C-terminal target domain protein- | 49           | 75           | 60          | 11       | 68       | 86          |
| 758275      | transposase IS66 family protein-                   | 42           | 82           | 66          | 8        | 71       | 90          |
| 806790      | integron integrase family protein-                 | 85           | 39           | 31          | 32       | 47       | 59          |
| 117124      | secretory lipase family protein-                   | 31           | 93           | 75          | 4        | 75       | 95          |
| 149967      | secretory lipase family protein-                   | 31           | 93           | 75          | 4        | 75       | 95          |
| 266529      | flagellar system-associated repeat family protein- | 43           | 81           | 65          | 9        | 70       | 89          |
| 724570      | tape measure domain protein-                       | 69           | 55           | 44          | 23       | 56       | 71          |
| 262370      | hypothetical protein-                              | 16           | 108          | 87          | 0        | 79       | 100         |
| 741812      | bacterial regulatory, tetR family protein-         | 16           | 108          | 87          | 0        | 79       | 100         |
| 712522      | conserved hypothetical protein-                    | 46           | 78           | 63          | 11       | 68       | 86          |
| 163221      | alpha/beta hydrolase family domain protein-        | 29           | 95           | 77          | 4        | 75       | 95          |
| 412164      | conserved hypothetical protein-                    | 37           | 87           | 70          | 7        | 72       | 91          |
| 393644      | bacterial regulatory, tetR family protein-         | 26           | 98           | 79          | 3        | 76       | 96          |
| 390271      | bacterial Ig-like domain family protein-           | 41           | 83           | 67          | 9        | 70       | 89          |
| 224897      | flagellar system-associated repeat family protein- | 34           | 90           | 73          | 6        | 73       | 92          |
| 458722      | transposase C of IS166 homeodomain protein-        | 83           | 41           | 33          | 33       | 46       | 58          |
| 437500      | conserved hypothetical protein-                    | 43           | 81           | 65          | 10       | 69       | 87          |
| 249749      | conserved hypothetical protein-                    | 19           | 105          | 85          | 1        | 78       | 99          |
| 794065      | conserved hypothetical protein-                    | 19           | 105          | 85          | 1        | 78       | 99          |
| 308608      | conserved hypothetical protein-                    | 58           | 66           | 53          | 18       | 61       | 77          |
| 579355      | conserved hypothetical protein-                    | 58           | 66           | 53          | 18       | 61       | 77          |
| 670819      | conserved hypothetical protein-                    | 58           | 66           | 53          | 18       | 61       | 77          |
| 751178      | conserved hypothetical protein-                    | 58           | 66           | 53          | 18       | 61       | 77          |
| 500547      | flagellar system-associated repeat family protein- | 87           | 37           | 30          | 36       | 43       | 54          |
| 151         | conserved hypothetical protein-                    | 117          | 7            | 6           | 61       | 18       | 23          |
| 543513      | conserved hypothetical protein-                    | 117          | 7            | 6           | 61       | 18       | 23          |
| 663769      | conserved hypothetical protein-                    | 117          | 7            | 6           | 61       | 18       | 23          |
| 724742      | conserved hypothetical protein-                    | 117          | 7            | 6           | 61       | 18       | 23          |
| 514002      | conserved hypothetical protein-                    | 122          | 2            | 2           | 68       | 11       | 14          |
| 667656      | rhs element Vgr family protein-                    | 46           | 78           | 63          | 12       | 67       | 85          |
| 545732      | conserved hypothetical protein-                    | 48           | 76           | 61          | 13       | 66       | 84          |

suppl Table 4b. Centroids found at greater frequency in perirectal isolates

| Centroid ID | Annotation                                 | Perirectal_A | Perirectal_P | % Frequency | Sputum_A | Sputum_P | % Frequency |
|-------------|--------------------------------------------|--------------|--------------|-------------|----------|----------|-------------|
| 335504      | secretory lipase family protein-           | 95           | 29           | 23          | 75       | 4        | 5           |
| 483361      | secretory lipase family protein-           | 95           | 29           | 23          | 75       | 4        | 5           |
| 645315      | bacterial regulatory, tetR family protein- | 106          | 18           | 15          | 78       | 1        | 1           |
| 800832      | HPP family protein-                        | 106          | 18           | 15          | 78       | 1        | 1           |

**Suppl Table 5. Centroids unique to carbapenem resistant and sensitive groups**

| <b>5a. Centroids found only in resistant genomes</b> |                                                            |
|------------------------------------------------------|------------------------------------------------------------|
| <b>Centroid ID</b>                                   | <b>Annotation</b>                                          |
| 365901                                               | type IV pilin structural subunit-                          |
| 733161                                               | oxidoreductase , NAD-binding Rossmann fold family protein- |
| 733163                                               | capsule polysaccharide biosynthesis family protein-        |
| 74448                                                | glycosyl transferases group 1 family protein-              |
| 55125                                                | polysaccharide biosynthesis family protein-                |
| 563378                                               | conserved hypothetical protein-                            |
| 197234                                               | KR domain protein-                                         |
| 197235                                               | cytidyltransferase family protein-                         |

| <b>5b. Centroids found only in sensitive genomes</b> |                                                                                     |
|------------------------------------------------------|-------------------------------------------------------------------------------------|
| <b>Centroid ID</b>                                   | <b>Annotation</b>                                                                   |
| 542670                                               | 3-hydroxyacyl-CoA dehydrogenase, NAD binding domain protein-                        |
| 718301                                               | ABC transporter family protein-                                                     |
| 788064                                               | ABC transporter family protein-                                                     |
| 713469                                               | acetyltransferase family protein-                                                   |
| 317070                                               | acyl-CoA dehydrogenase, C-terminal domain protein-                                  |
| 185135                                               | addiction module toxin, Txe/YoeB family-                                            |
| 789727                                               | addiction module toxin, Txe/YoeB family-                                            |
| 412733                                               | alkylhydroperoxidase AhpD family core domain protein-                               |
| 567900                                               | ankyrin repeats family protein-                                                     |
| 507216                                               | antitoxin of toxin-antitoxin stability system N-terminal family protein-            |
| 789906                                               | BAAT / Acyl-CoA thioester hydrolase C terminal family protein-                      |
| 788057                                               | bacterial extracellular solute-binding, 5 Middle family protein-                    |
| 241962                                               | bacterial regulatory , Fis family protein-                                          |
| 100555                                               | bacterial transcriptional regulator family protein-                                 |
| 718475                                               | beta-lactamase family protein-                                                      |
| 104037                                               | binding-protein-dependent transport system inner membrane component family protein- |
| 335056                                               | capsular exopolysaccharide family domain protein-                                   |
| 630564                                               | capsular exopolysaccharide family domain protein-                                   |
| 252121                                               | citrate transporter family protein-                                                 |
| 475293                                               | class II Aldolase and Adducin N-terminal domain protein-                            |
| 100552                                               | coA-transferase III family protein-                                                 |
| 254612                                               | cobQ/CobB/MinD/ParA nucleotide binding domain protein-                              |
| 583453                                               | cobQ/CobB/MinD/ParA nucleotide binding domain protein-                              |
| 628837                                               | cobQ/CobB/MinD/ParA nucleotide binding domain protein-                              |
| 104171                                               | conserved hypothetical protein-                                                     |
| 104507                                               | conserved hypothetical protein-                                                     |
| 104696                                               | conserved hypothetical protein-                                                     |
| 142532                                               | conserved hypothetical protein-                                                     |
| 1666                                                 | conserved hypothetical protein-                                                     |
| 1668                                                 | conserved hypothetical protein-                                                     |
| 184601                                               | conserved hypothetical protein-                                                     |
| 185111                                               | conserved hypothetical protein-                                                     |
| 185121                                               | conserved hypothetical protein-                                                     |
| 186609                                               | conserved hypothetical protein-                                                     |

|        |                                 |
|--------|---------------------------------|
| 306889 | conserved hypothetical protein- |
| 314867 | conserved hypothetical protein- |
| 319433 | conserved hypothetical protein- |
| 320111 | conserved hypothetical protein- |
| 320421 | conserved hypothetical protein- |
| 357107 | conserved hypothetical protein- |
| 359586 | conserved hypothetical protein- |
| 398655 | conserved hypothetical protein- |
| 413745 | conserved hypothetical protein- |
| 443083 | conserved hypothetical protein- |
| 456335 | conserved hypothetical protein- |
| 475251 | conserved hypothetical protein- |
| 490202 | conserved hypothetical protein- |
| 490203 | conserved hypothetical protein- |
| 490730 | conserved hypothetical protein- |
| 505    | conserved hypothetical protein- |
| 518449 | conserved hypothetical protein- |
| 518469 | conserved hypothetical protein- |
| 543458 | conserved hypothetical protein- |
| 568439 | conserved hypothetical protein- |
| 630646 | conserved hypothetical protein- |
| 715066 | conserved hypothetical protein- |
| 715650 | conserved hypothetical protein- |
| 724834 | conserved hypothetical protein- |
| 787821 | conserved hypothetical protein- |
| 788739 | conserved hypothetical protein- |
| 790527 | conserved hypothetical protein- |
| 140781 | conserved hypothetical protein- |
| 141573 | conserved hypothetical protein- |
| 166152 | conserved hypothetical protein- |
| 185113 | conserved hypothetical protein- |
| 185123 | conserved hypothetical protein- |
| 186057 | conserved hypothetical protein- |
| 241959 | conserved hypothetical protein- |
| 320060 | conserved hypothetical protein- |
| 333448 | conserved hypothetical protein- |
| 3381   | conserved hypothetical protein- |
| 357069 | conserved hypothetical protein- |
| 357091 | conserved hypothetical protein- |
| 3747   | conserved hypothetical protein- |
| 397861 | conserved hypothetical protein- |
| 455257 | conserved hypothetical protein- |
| 474942 | conserved hypothetical protein- |
| 489718 | conserved hypothetical protein- |
| 502088 | conserved hypothetical protein- |
| 507208 | conserved hypothetical protein- |
| 514787 | conserved hypothetical protein- |
| 528051 | conserved hypothetical protein- |
| 542183 | conserved hypothetical protein- |
| 568442 | conserved hypothetical protein- |

|        |                                 |
|--------|---------------------------------|
| 583673 | conserved hypothetical protein- |
| 598672 | conserved hypothetical protein- |
| 629797 | conserved hypothetical protein- |
| 630523 | conserved hypothetical protein- |
| 696465 | conserved hypothetical protein- |
| 712596 | conserved hypothetical protein- |
| 716754 | conserved hypothetical protein- |
| 720074 | conserved hypothetical protein- |
| 728419 | conserved hypothetical protein- |
| 791500 | conserved hypothetical protein- |
| 800887 | conserved hypothetical protein- |
| 239443 | conserved hypothetical protein- |
| 250287 | conserved hypothetical protein- |
| 251703 | conserved hypothetical protein- |
| 278194 | conserved hypothetical protein- |
| 359303 | conserved hypothetical protein- |
| 359307 | conserved hypothetical protein- |
| 3712   | conserved hypothetical protein- |
| 474851 | conserved hypothetical protein- |
| 502194 | conserved hypothetical protein- |
| 543186 | conserved hypothetical protein- |
| 543323 | conserved hypothetical protein- |
| 544801 | conserved hypothetical protein- |
| 724820 | conserved hypothetical protein- |
| 724832 | conserved hypothetical protein- |
| 728417 | conserved hypothetical protein- |
| 799897 | conserved hypothetical protein- |
| 164772 | conserved hypothetical protein- |
| 184523 | conserved hypothetical protein- |
| 250296 | conserved hypothetical protein- |
| 250297 | conserved hypothetical protein- |
| 334967 | conserved hypothetical protein- |
| 356957 | conserved hypothetical protein- |
| 397552 | conserved hypothetical protein- |
| 452339 | conserved hypothetical protein- |
| 599256 | conserved hypothetical protein- |
| 629584 | conserved hypothetical protein- |
| 725126 | conserved hypothetical protein- |
| 725127 | conserved hypothetical protein- |
| 725128 | conserved hypothetical protein- |
| 729519 | conserved hypothetical protein- |
| 731317 | conserved hypothetical protein- |
| 102316 | conserved hypothetical protein- |
| 139362 | conserved hypothetical protein- |
| 22726  | conserved hypothetical protein- |
| 316762 | conserved hypothetical protein- |
| 3383   | conserved hypothetical protein- |
| 356250 | conserved hypothetical protein- |
| 473666 | conserved hypothetical protein- |
| 500453 | conserved hypothetical protein- |

|        |                                                                    |
|--------|--------------------------------------------------------------------|
| 515887 | conserved hypothetical protein-                                    |
| 567955 | conserved hypothetical protein-                                    |
| 714714 | conserved hypothetical protein-                                    |
| 718443 | conserved hypothetical protein-                                    |
| 787713 | conserved hypothetical protein-                                    |
| 98949  | conserved hypothetical protein-                                    |
| 183351 | conserved hypothetical protein-                                    |
| 1941   | conserved hypothetical protein-                                    |
| 198593 | conserved hypothetical protein-                                    |
| 2535   | conserved hypothetical protein-                                    |
| 472599 | conserved hypothetical protein-                                    |
| 629710 | conserved hypothetical protein-                                    |
| 720052 | conserved hypothetical protein-                                    |
| 725155 | conserved hypothetical protein-                                    |
| 729518 | conserved hypothetical protein-                                    |
| 730454 | conserved hypothetical protein-                                    |
| 788238 | conserved hypothetical protein-                                    |
| 254666 | conserved hypothetical protein-                                    |
| 306307 | conserved hypothetical protein-                                    |
| 185117 | conserved hypothetical protein-                                    |
| 250282 | conserved hypothetical protein-                                    |
| 251003 | conserved hypothetical protein-                                    |
| 359582 | conserved hypothetical protein-                                    |
| 440778 | conserved hypothetical protein-                                    |
| 802051 | conserved hypothetical protein-                                    |
| 516412 | conserved hypothetical protein-                                    |
| 581735 | conserved hypothetical protein-                                    |
| 3418   | conserved hypothetical protein-                                    |
| 788495 | conserved hypothetical protein-                                    |
| 528223 | conserved hypothetical protein-                                    |
| 139033 | conserved hypothetical protein-                                    |
| 580784 | creatinase-                                                        |
| 716596 | creatinase-                                                        |
| 719454 | CRISPR-associated endonuclease Cas1-                               |
| 318068 | CRISPR-associated family protein-                                  |
| 318070 | CRISPR-associated family protein-                                  |
| 335618 | CRISPR-associated family protein-                                  |
| 502958 | CRISPR-associated protein Csy3-                                    |
| 2902   | CSLREA domain protein-                                             |
| 102452 | curli production assembly/transport component CsgG family protein- |
| 716458 | DDE domain protein-                                                |
| 102882 | DDE domain protein-                                                |
| 103060 | DDE superendonuclease family protein-                              |
| 336029 | DDE superendonuclease family protein-                              |
| 720264 | DDE superendonuclease family protein-                              |
| 630520 | DJ-1/Pfpl family protein-                                          |
| 545067 | endodeoxyribonuclease RusA family protein-                         |
| 1673   | flagellin N-methylase family protein-                              |
| 263135 | flagellin N-methylase family protein-                              |
| 713470 | glycosyl transferase 1 family protein-                             |

|        |                                                                        |
|--------|------------------------------------------------------------------------|
| 489747 | glycosyl transferase 2 family protein-                                 |
| 543160 | glycosyl transferases group 1 family protein-                          |
| 319485 | glycosyltransferase 52 family protein-                                 |
| 729524 | haemagglutinin repeat family protein-                                  |
| 1669   | helix-turn-helix domain protein-                                       |
| 251327 | helix-turn-helix domain protein-                                       |
| 183298 | helix-turn-helix family protein-                                       |
| 584724 | helix-turn-helix family protein-                                       |
| 606027 | helix-turn-helix family protein-                                       |
| 542664 | HMGL-like family protein-                                              |
| 790797 | HNH endonuclease family protein-                                       |
| 629269 | homeo-like domain protein-                                             |
| 1670   | HTH domain protein-                                                    |
| 803867 | HTH-like domain protein-                                               |
| 105242 | HTH-like domain protein-                                               |
| 359563 | hxlR-like helix-turn-helix family protein-                             |
| 718151 | hydrolyase, tartrate alpha subunit/fumarate, Fe-S type domain protein- |
| 453742 | hypothetical protein-                                                  |
| 500445 | hypothetical protein-                                                  |
| 594362 | hypothetical protein-                                                  |
| 257360 | hypothetical protein-                                                  |
| 2751   | hypothetical protein-                                                  |
| 715276 | hypothetical protein-                                                  |
| 3763   | hypothetical protein-                                                  |
| 399469 | hypothetical protein-                                                  |
| 440370 | hypothetical protein-                                                  |
| 699216 | hypothetical protein-                                                  |
| 257464 | insB domain protein-                                                   |
| 317823 | integrase core domain protein-                                         |
| 799900 | integrase domain protein-                                              |
| 106444 | integrase domain protein-                                              |
| 358223 | L(+)-tartrate dehydratase subunit beta-                                |
| 335055 | low molecular weight protein-tyrosine-phosphatase ptp-                 |
| 317076 | luciferase-like monooxygenase family protein-                          |
| 333354 | luciferase-like monooxygenase family protein-                          |
| 239644 | lysR substrate binding domain protein-                                 |
| 712670 | lysR substrate binding domain protein-                                 |
| 240075 | lysR substrate binding domain protein-                                 |
| 518447 | macro domain protein-                                                  |
| 239648 | major Facilitator Superfamily protein-                                 |
| 166893 | major Facilitator Superfamily protein-                                 |
| 164751 | MJ0042 family finger-like domain protein-                              |
| 599171 | nickel import ATP-binding protein Nike-                                |
| 475294 | NMT1/THI5 like family protein-                                         |
| 718302 | NMT1/THI5 like family protein-                                         |
| 1284   | outer membrane beta-barrel domain protein-                             |
| 488398 | outer membrane porin, OprD family-                                     |
| 336253 | P-loop domain protein-                                                 |
| 238902 | PAAR motif family protein-                                             |
| 489405 | PAAR motif family protein-                                             |



|        |                                                                      |
|--------|----------------------------------------------------------------------|
| 313469 | PAAR motif family protein-                                           |
| 543324 | PAAR motif family protein-                                           |
| 489018 | peptidase inhibitor I78 family protein-                              |
| 716601 | phage integrase domain protein-                                      |
| 398653 | phage integrase family protein-                                      |
| 103376 | phage integrase family protein-                                      |
| 256182 | phage integrase family protein-                                      |
| 317782 | phage integrase family protein-                                      |
| 413706 | phage integrase family protein-                                      |
| 716771 | phage integrase family protein-                                      |
| 333100 | phage integrase family protein-                                      |
| 716453 | phage integrase family protein-                                      |
| 472126 | phage integrase family protein-                                      |
| 98948  | phage integrase family protein-                                      |
| 185137 | phage integrase family protein-                                      |
| 263231 | phage integrase family protein-                                      |
| 359595 | phage integrase family protein-                                      |
| 200270 | phage integrase-                                                     |
| 98820  | phage minor tail family protein-                                     |
| 566640 | pilus assembly FilF domain protein-                                  |
| 347335 | pilus subunit FilA domain protein-                                   |
| 489746 | polysaccharide biosynthesis family protein-                          |
| 335054 | polysaccharide biosynthesis/export family protein-                   |
| 102317 | pre-toxin domain with VENN motif family protein-                     |
| 397737 | prokaryotic E2 B family protein-                                     |
| 167071 | prophage CP4-57 regulatory family protein-                           |
| 185133 | prophage CP4-57 regulatory family protein-                           |
| 140775 | prophage CP4-57 regulatory family protein-                           |
| 788056 | putative aBC-type dipeptide transport system, periplasmic component- |
| 453548 | putative cation efflux system protein-                               |
| 790957 | putative cRISPR-associated helicase Cas3-                            |
| 583677 | putative domain protein-                                             |
| 790958 | putative helicase-                                                   |
| 472939 | putative integrase-                                                  |
| 583486 | putative integrase-                                                  |
| 713233 | putative lipoprotein NMB1124/NMB1162-                                |
| 185122 | putative lipoprotein-                                                |
| 732235 | putative lipoprotein-                                                |
| 713232 | putative lipoprotein-                                                |
| 104698 | putative membrane protein-                                           |
| 320113 | putative membrane protein-                                           |
| 473624 | putative membrane protein-                                           |
| 100811 | putative membrane protein-                                           |
| 545040 | putative membrane protein-                                           |
| 251438 | putative methionine aminopeptidase-                                  |
| 474137 | putative methionine aminopeptidase-                                  |
| 629686 | putative outer membrane protein-                                     |
| 500455 | putative phage-type endonuclease domain protein-                     |
| 568448 | putative phage-type endonuclease domain protein-                     |
| 472597 | putative phage-type endonuclease domain protein-                     |

|        |                                                                |
|--------|----------------------------------------------------------------|
| 240781 | putative predicted protein-                                    |
| 254838 | putative predicted protein-                                    |
| 356639 | putative predicted protein-                                    |
| 440411 | putative predicted protein-                                    |
| 544797 | putative predicted protein-                                    |
| 607726 | putative predicted protein-                                    |
| 101959 | putative predicted protein-                                    |
| 250726 | RDD family protein-                                            |
| 251440 | rhs element Vgr family protein-                                |
| 488261 | rhs element Vgr family protein-                                |
| 240783 | rhs element Vgr family protein-                                |
| 2134   | rhs element Vgr family protein-                                |
| 473661 | rhs element Vgr family protein-                                |
| 317075 | secretory lipase family protein-                               |
| 595328 | sel1 repeat family protein-                                    |
| 543183 | sel1 repeat family protein-                                    |
| 542669 | sugar (and other) transporter family protein-                  |
| 333064 | terminase-like family protein-                                 |
| 166585 | tetratricopeptide repeat family protein-                       |
| 788066 | tonB dependent receptor family protein-                        |
| 788065 | tonB-dependent Receptor Plug domain protein-                   |
| 453874 | transposase DDE domain protein-                                |
| 336156 | transposase family protein-                                    |
| 583352 | transposase family protein-                                    |
| 698747 | transposase family protein-                                    |
| 320277 | transposase family protein-                                    |
| 455336 | transposase family protein-                                    |
| 787861 | type I secretion C-terminal , TIGR03661 family domain protein- |
| 597260 | type VI secretion system Rhs element Vgr family protein-       |
| 441712 | vacuole effluxer Atg22 like family protein-                    |
| 473652 | WYL domain protein-                                            |
| 595205 | WYL domain protein-                                            |
| 488401 | xylose isomerase-like TIM barrel family protein-               |
| 488402 | YCII-related domain protein-                                   |
| 472598 | yqaj-like viral recombinase domain protein-                    |

---

**Suppl Table 6. Centroids unique to perirectal\_sensitive and perirectal\_resistent strains**

**6a. Found only in Perirectal\_sensitive when compared to perirectal\_resistent strains**

| <b>Centroid ID</b> | <b>Annotation</b>                                     |
|--------------------|-------------------------------------------------------|
| 102316             | conserved hypothetical protein-                       |
| 102317             | pre-toxin domain with VENN motif family protein-      |
| 140775             | prophage CP4-57 regulatory family protein-            |
| 141573             | conserved hypothetical protein-                       |
| 166893             | major Facilitator Superfamily protein-                |
| 22726              | conserved hypothetical protein-                       |
| 250282             | conserved hypothetical protein-                       |
| 254666             | conserved hypothetical protein-                       |
| 2939               | Na <sup>+</sup> /alanine symporter                    |
| 316762             | conserved hypothetical protein-                       |
| 317823             | integrase core domain protein-                        |
| 318068             | CRISPR-associated family protein-                     |
| 318070             | CRISPR-associated family protein-                     |
| 334967             | conserved hypothetical protein-                       |
| 335618             | CRISPR-associated family protein-                     |
| 336253             | P-loop domain protein-                                |
| 356957             | conserved hypothetical protein-                       |
| 359563             | hxlR-like helix-turn-helix family protein-            |
| 392673             | transposase family protein-                           |
| 397552             | conserved hypothetical protein-                       |
| 398780             | conserved hypothetical protein-                       |
| 412733             | alkylhydroperoxidase AhpD family core domain protein- |
| 440778             | conserved hypothetical protein-                       |
| 453874             | transposase DDE domain protein-                       |
| 455257             | conserved hypothetical protein-                       |
| 502958             | CRISPR-associated protein Csy3-                       |
| 599256             | conserved hypothetical protein-                       |
| 630523             | conserved hypothetical protein-                       |
| 696465             | conserved hypothetical protein-                       |
| 714714             | conserved hypothetical protein-                       |
| 716601             | phage integrase domain protein-                       |
| 716754             | conserved hypothetical protein-                       |
| 716771             | phage integrase family protein-                       |
| 718402             | conserved hypothetical protein-                       |
| 719454             | CRISPR-associated endonuclease Cas1-                  |
| 729524             | haemagglutinin repeat family protein-                 |
| 790957             | putative cCRISPR-associated helicase Cas3-            |

|        |                                                                        |
|--------|------------------------------------------------------------------------|
| 790958 | putative helicase-                                                     |
| 79562  | conserved hypothetical protein-                                        |
| 102882 | DDE domain protein-                                                    |
| 104366 | conserved hypothetical protein-                                        |
| 139362 | conserved hypothetical protein-                                        |
| 185117 | conserved hypothetical protein-                                        |
| 185137 | phage integrase family protein-                                        |
| 240075 | lysR substrate binding domain protein-                                 |
| 2535   | aminomethyltransferase folate-binding domain protein-                  |
| 254612 | cobQ/CobB/MinD/ParA nucleotide binding domain protein-                 |
| 263231 | phage integrase family protein-                                        |
| 306307 | conserved hypothetical protein-                                        |
| 333100 | phage integrase family protein-                                        |
| 347335 | pilus subunit FilA domain protein-                                     |
| 347357 | conserved hypothetical protein-                                        |
| 356250 | conserved hypothetical protein-                                        |
| 358223 | L(+)-tartrate dehydratase subunit beta-                                |
| 359582 | conserved hypothetical protein-                                        |
| 359595 | phage integrase family protein-                                        |
| 398786 | conserved hypothetical protein-                                        |
| 398787 | conserved hypothetical protein-                                        |
| 441712 | vacuole effluxer Atg22 like family protein-                            |
| 452339 | conserved hypothetical protein-                                        |
| 472126 | phage integrase family protein-                                        |
| 583453 | cobQ/CobB/MinD/ParA nucleotide binding domain protein-                 |
| 628837 | cobQ/CobB/MinD/ParA nucleotide binding domain protein-                 |
| 629269 | homeo-like domain protein-                                             |
| 716453 | phage integrase family protein-                                        |
| 718151 | hydrolyase, tartrate alpha subunit/fumarate, Fe-S type domain protein- |
| 718404 | helix-turn-helix domain protein-                                       |
| 718406 | conserved hypothetical protein-                                        |
| 725155 | conserved hypothetical protein-                                        |
| 729518 | conserved hypothetical protein-                                        |
| 98406  | helix-turn-helix domain protein-                                       |
| 98948  | phage integrase family protein-                                        |
| 98949  | conserved hypothetical protein-                                        |
| 105242 | HTH-like domain protein-                                               |
| 183351 | conserved hypothetical protein-                                        |
| 198593 | conserved hypothetical protein-                                        |
| 240783 | rhs element Vgr family protein-                                        |
| 320277 | transposase family protein-                                            |
| 397737 | prokaryotic E2 B family protein-                                       |

|        |                                                                   |
|--------|-------------------------------------------------------------------|
| 455336 | transposase family protein-                                       |
| 581735 | conserved hypothetical protein-                                   |
| 583486 | putative integrase-                                               |
| 629584 | conserved hypothetical protein-                                   |
| 629686 | putative outer membrane protein-                                  |
| 718443 | conserved hypothetical protein-                                   |
| 718475 | beta-lactamase family protein-                                    |
| 720052 | conserved hypothetical protein-                                   |
| 730454 | conserved hypothetical protein-                                   |
| 799900 | integrase domain protein-                                         |
| 802051 | conserved hypothetical protein-                                   |
| 102452 | curl production assembly/transport component CsgG family protein- |
| 106167 | dTDP-4-dehydrorhamnose reductase-                                 |
| 106168 | glucose-1-phosphate thymidyltransferase-                          |
| 106169 | dTDP-4-dehydrorhamnose 3,5-epimerase-                             |
| 106444 | integrase domain protein-                                         |
| 164336 | dTDP-4-dehydrorhamnose 3,5-epimerase-                             |
| 164338 | dTDP-4-dehydrorhamnose reductase-                                 |
| 254207 | conserved hypothetical protein-                                   |
| 3418   | conserved hypothetical protein-                                   |
| 455186 | HNH endonuclease family protein-                                  |
| 516412 | conserved hypothetical protein-                                   |
| 597260 | type VI secretion system Rhs element Vgr family protein-          |
| 629003 | nucleotidyl transferase family protein-                           |
| 698003 | glucose-1-phosphate thymidyltransferase-                          |
| 713232 | putative lipoprotein-                                             |
| 713233 | putative lipoprotein NMB1124/NMB1162-                             |
| 164334 | glycosyl transferases group 1 family protein-                     |
| 166585 | tetratricopeptide repeat family protein-                          |
| 2134   | rhs element Vgr family protein-                                   |
| 241151 | glycosyl transferase 2 family protein-                            |
| 334101 | glycosyl transferase 2 family protein-                            |
| 334106 | mitochondrial fission ELM1 family protein-                        |
| 359361 | mitochondrial fission ELM1 family protein-                        |
| 543183 | sel1 repeat family protein-                                       |
| 629002 | glycosyl transferase 2 family protein-                            |
| 106166 | dTDP-glucose 4,6-dehydratase-                                     |
| 164339 | dTDP-glucose 4,6-dehydratase-                                     |
| 240200 | dTDP-glucose 4,6-dehydratase-                                     |
| 240875 | conserved hypothetical protein-                                   |
| 629007 | NAD dependent epimerase/dehydratase family protein-               |
| 788495 | conserved hypothetical protein-                                   |

|        |                                                          |
|--------|----------------------------------------------------------|
| 473661 | rhs element Vgr family protein-                          |
| 595328 | sel1 repeat family protein-                              |
| 595844 | metal-binding domain of MaoC dehydratase family protein- |
| 528223 | conserved hypothetical protein-                          |
| 139033 | conserved hypothetical protein-                          |
| 182920 | KR domain protein-                                       |
| 182921 | KR domain protein-                                       |
| 182922 | KR domain protein-                                       |
| 182926 | conserved hypothetical protein-                          |
| 565089 | lysR substrate binding domain protein-                   |
| 565094 | acyl-CoA dehydrogenase, N-terminal domain protein-       |
| 565095 | outer membrane transport family protein-                 |
| 565097 | sodium Bile acid symporter family protein-               |
| 714592 | peptidase S24-like family protein-                       |

---

**6b. Found only in perirectal-resistant when compare with perirectal-sensitive strains**

---

| <b>Centroid ID</b> | <b>Annotation</b>                                          |
|--------------------|------------------------------------------------------------|
| 733161             | oxidoreductase , NAD-binding Rossmann fold family protein- |
| 733163             | capsule polysaccharide biosynthesis family protein-        |
| 74448              | glycosyl transferases group 1 family protein-              |
| 55125              | polysaccharide biosynthesis family protein-                |
| 563378             | conserved hypothetical protein-                            |
| 197234             | KR domain protein-                                         |
| 197235             | cytidyltransferase family protein-                         |

---

**6c. Found only in sputum\_sensitive when compared to sputum\_resistant**

---

| <b>Centroid ID</b> | <b>Annotation</b>                         |
|--------------------|-------------------------------------------|
| 142502             | conserved hypothetical protein-           |
| 211175             | hypothetical protein-                     |
| 250282             | conserved hypothetical protein-           |
| 313469             | PAAR motif family protein-                |
| 3418               | hypothetical protein                      |
| 440778             | conserved hypothetical protein-           |
| 474942             | conserved hypothetical protein-           |
| 480535             | HNH endonuclease family protein-          |
| 483049             | helix-turn-helix domain protein-          |
| 483050             | alpha/beta hydrolase fold family protein- |
| 543324             | PAAR motif family protein-                |
| 675874             | conserved hypothetical protein-           |
| 675913             | hypothetical protein-                     |

|        |                                                          |
|--------|----------------------------------------------------------|
| 780118 | hypothetical protein-                                    |
| 166585 | tetratricopeptide repeat family protein-                 |
| 240783 | rhs element Vgr family protein-                          |
| 251003 | conserved hypothetical protein-                          |
| 251327 | helix-turn-helix domain protein-                         |
| 47489  | malonate transporter, MadL subunit-                      |
| 543183 | sel1 repeat family protein-                              |
| 597260 | type VI secretion system Rhs element Vgr family protein- |
| 732221 | conserved hypothetical protein-                          |
| 781747 | conserved hypothetical protein-                          |
| 645920 | helix-turn-helix family protein-                         |
| 139033 | conserved hypothetical protein-                          |
| 2134   | sulfatase family protein-                                |
| 473661 | rhs element Vgr family protein-                          |
| 528223 | conserved hypothetical protein-                          |
| 589033 | rhs element Vgr family domain protein-                   |
| 644560 | malonate transporter, MadM subunit-                      |
| 481603 | conserved hypothetical protein-                          |

**6d. Found only in Sputum\_resistant isolates when compared to sputum\_sensitive**

| <b>Centroid ID</b> | <b>Annotation</b>         |
|--------------------|---------------------------|
| 805287             | Carbapenemase OXA-23 gene |

Suppl Table 7. Centroids found at greater frequency in carbapenem resistant isolates

| Centroid ID | Annotation                                                                 | Sensitive_A | Sensitive_P | % Frequency | Resistant_A | Resistant_P | % Frequency |
|-------------|----------------------------------------------------------------------------|-------------|-------------|-------------|-------------|-------------|-------------|
| 136137      | putative membrane protein-                                                 | 46          | 27          | 37          | 5           | 122         | 96          |
| 336369      | putative membrane protein-                                                 | 39          | 34          | 47          | 2           | 125         | 98          |
| 552193      | putative pilus subunit FliA-                                               | 34          | 39          | 53          | 0           | 127         | 100         |
| 393342      | conserved hypothetical protein-                                            | 56          | 17          | 23          | 20          | 107         | 84          |
| 33850       | conserved hypothetical protein-                                            | 57          | 16          | 22          | 22          | 105         | 83          |
| 389568      | bacterial Ig-like domain family protein-                                   | 35          | 38          | 52          | 1           | 126         | 99          |
| 278501      | type I secretion C-terminal target domain protein-                         | 36          | 37          | 51          | 2           | 125         | 98          |
| 669695      | conserved hypothetical protein-                                            | 50          | 23          | 32          | 15          | 112         | 88          |
| 676783      | conserved hypothetical protein-                                            | 63          | 10          | 14          | 36          | 91          | 72          |
| 175329      | conserved hypothetical protein-                                            | 49          | 24          | 33          | 15          | 112         | 88          |
| 545732      | conserved hypothetical protein-                                            | 47          | 26          | 36          | 13          | 114         | 90          |
| 37288       | conserved hypothetical protein-                                            | 48          | 25          | 34          | 14          | 113         | 89          |
| 102438      | flagellar system-associated repeat family protein-                         | 31          | 42          | 58          | 1           | 126         | 99          |
| 217537      | cell wall-associated protease domain protein-                              | 31          | 42          | 58          | 1           | 126         | 99          |
| 292400      | heme oxygenase family protein-                                             | 47          | 26          | 36          | 14          | 113         | 89          |
| 370880      | conserved hypothetical protein-                                            | 47          | 26          | 36          | 14          | 113         | 89          |
| 431013      | conserved hypothetical protein-                                            | 47          | 26          | 36          | 14          | 113         | 89          |
| 451113      | tonB family C-terminal domain protein-                                     | 47          | 26          | 36          | 14          | 113         | 89          |
| 506784      | RNA polymerase sigma factor, sigma-70 family protein-                      | 47          | 26          | 36          | 14          | 113         | 89          |
| 592033      | secretin and TonB N terminus short domain protein-                         | 47          | 26          | 36          | 14          | 113         | 89          |
| 120545      | HI0933-like family protein-                                                | 49          | 24          | 33          | 16          | 111         | 87          |
| 219455      | saccharopine dehydrogenase family protein-                                 | 49          | 24          | 33          | 16          | 111         | 87          |
| 363161      | putative membrane protein-                                                 | 49          | 24          | 33          | 16          | 111         | 87          |
| 409437      | putative membrane protein-                                                 | 49          | 24          | 33          | 16          | 111         | 87          |
| 570885      | bacterial regulatory, tetR family protein-                                 | 49          | 24          | 33          | 16          | 111         | 87          |
| 613122      | putative membrane protein-                                                 | 49          | 24          | 33          | 16          | 111         | 87          |
| 700856      | HI0933-like family protein-                                                | 49          | 24          | 33          | 16          | 111         | 87          |
| 729735      | conserved hypothetical protein-                                            | 49          | 24          | 33          | 16          | 111         | 87          |
| 49565       | conserved hypothetical protein-                                            | 28          | 45          | 62          | 0           | 127         | 100         |
| 546737      | conserved hypothetical protein-                                            | 28          | 45          | 62          | 0           | 127         | 100         |
| 607393      | putative pilus subunit FliA-                                               | 28          | 45          | 62          | 0           | 127         | 100         |
| 629143      | conserved hypothetical protein-                                            | 28          | 45          | 62          | 0           | 127         | 100         |
| 188030      | glycosyl transferases group 1 family protein-                              | 63          | 10          | 14          | 40          | 87          | 69          |
| 667923      | conserved hypothetical protein-                                            | 30          | 43          | 59          | 1           | 126         | 99          |
| 374387      | FAD dependent oxidoreductase family protein-                               | 48          | 25          | 34          | 16          | 111         | 87          |
| 273671      | sel1 repeat family protein-                                                | 46          | 27          | 37          | 14          | 113         | 89          |
| 372974      | conserved hypothetical protein-                                            | 55          | 18          | 25          | 27          | 100         | 79          |
| 570697      | fecR family protein-                                                       | 47          | 26          | 36          | 16          | 111         | 87          |
| 628103      | helix-turn-helix domain protein-                                           | 45          | 28          | 38          | 14          | 113         | 89          |
| 721524      | insA N-terminal domain protein-                                            | 69          | 4           | 5           | 57          | 70          | 55          |
| 293762      | conserved hypothetical protein-                                            | 66          | 7           | 10          | 49          | 78          | 61          |
| 365761      | conserved hypothetical protein-                                            | 66          | 7           | 10          | 49          | 78          | 61          |
| 464586      | conserved hypothetical protein-                                            | 66          | 7           | 10          | 49          | 78          | 61          |
| 633416      | conserved hypothetical protein-                                            | 66          | 7           | 10          | 49          | 78          | 61          |
| 637764      | conserved hypothetical protein-                                            | 50          | 23          | 32          | 21          | 106         | 83          |
| 467384      | glycosyltransferase Family 4 family protein-                               | 33          | 40          | 55          | 4           | 123         | 97          |
| 62459       | helix-turn-helix domain protein-                                           | 44          | 29          | 40          | 14          | 113         | 89          |
| 75784       | conserved hypothetical protein-                                            | 44          | 29          | 40          | 14          | 113         | 89          |
| 806147      | conserved hypothetical protein-                                            | 44          | 29          | 40          | 14          | 113         | 89          |
| 393781      | conserved hypothetical protein-                                            | 65          | 8           | 11          | 48          | 79          | 62          |
| 654152      | conserved hypothetical protein-                                            | 65          | 8           | 11          | 48          | 79          | 62          |
| 806724      | conserved hypothetical protein-                                            | 65          | 8           | 11          | 48          | 79          | 62          |
| 784750      | phage replication CRI family protein-                                      | 67          | 6           | 8           | 53          | 74          | 58          |
| 386745      | bacterial transcriptional regulator family protein-                        | 54          | 19          | 26          | 27          | 100         | 79          |
| 449824      | major Facilitator Superfamily protein-                                     | 54          | 19          | 26          | 27          | 100         | 79          |
| 580816      | putative DcaP-like domain protein-                                         | 54          | 19          | 26          | 27          | 100         | 79          |
| 647825      | demethylmenaquinone methyltransferase family protein-                      | 54          | 19          | 26          | 27          | 100         | 79          |
| 805156      | D-isomer specific 2-hydroxyacid dehydrogenase, NAD binding domain protein- | 54          | 19          | 26          | 27          | 100         | 79          |
| 311042      | conserved hypothetical protein-                                            | 62          | 11          | 15          | 41          | 86          | 68          |
| 36804       | conserved hypothetical protein-                                            | 51          | 22          | 30          | 23          | 104         | 82          |
| 808251      | hypothetical protein-                                                      | 51          | 22          | 30          | 23          | 104         | 82          |
| 330043      | phosphotransferase enzyme family protein-                                  | 66          | 7           | 10          | 51          | 76          | 60          |
| 448535      | conserved hypothetical protein-                                            | 47          | 26          | 36          | 18          | 109         | 86          |
| 223653      | alpha/beta hydrolase fold family protein-                                  | 54          | 19          | 26          | 28          | 99          | 78          |
| 408000      | conserved hypothetical protein-                                            | 54          | 19          | 26          | 28          | 99          | 78          |
| 620485      | DJ-1/PfpI family protein-                                                  | 54          | 19          | 26          | 28          | 99          | 78          |
| 393533      | conserved hypothetical protein-                                            | 64          | 9           | 12          | 47          | 80          | 63          |
| 375450      | conserved hypothetical protein-                                            | 37          | 36          | 49          | 8           | 119         | 94          |
| 473530      | conserved hypothetical protein-                                            | 37          | 36          | 49          | 8           | 119         | 94          |
| 726703      | conserved hypothetical protein-                                            | 37          | 36          | 49          | 8           | 119         | 94          |
| 727942      | conserved hypothetical protein-                                            | 37          | 36          | 49          | 8           | 119         | 94          |
| 122216      | transcriptional regulator, TetR family domain protein-                     | 38          | 35          | 48          | 9           | 118         | 93          |
| 367280      | histidine kinase-, DNA gyrase B-, and HSP90-like ATPase family protein-    | 63          | 10          | 14          | 45          | 82          | 65          |
| 393091      | dihydropteroate synthase-                                                  | 61          | 12          | 16          | 41          | 86          | 68          |
| 739206      | conserved hypothetical protein-                                            | 61          | 12          | 16          | 41          | 86          | 68          |
| 19466       | type I secretion C-terminal target domain protein-                         | 60          | 13          | 18          | 39          | 88          | 69          |
| 494445      | lysM domain protein-                                                       | 66          | 7           | 10          | 52          | 75          | 59          |
| 431185      | phage X family protein-                                                    | 66          | 7           | 10          | 53          | 74          | 58          |
| 617676      | helix-turn-helix family protein-                                           | 66          | 7           | 10          | 53          | 74          | 58          |
| 617677      | phage X family protein-                                                    | 66          | 7           | 10          | 53          | 74          | 58          |
| 523681      | conserved hypothetical protein-                                            | 65          | 8           | 11          | 50          | 77          | 61          |
| 494561      | antitoxin of toxin-antitoxin stability system N-terminal family protein-   | 59          | 14          | 19          | 38          | 89          | 70          |
| 805287      | beta-lactamase-                                                            | 71          | 2           | 3           | 68          | 59          | 46          |
| 194843      | conserved hypothetical protein-                                            | 64          | 9           | 12          | 48          | 79          | 62          |
| 433377      | conserved hypothetical protein-                                            | 64          | 9           | 12          | 48          | 79          | 62          |
| 226020      | conserved hypothetical protein-                                            | 52          | 21          | 29          | 26          | 101         | 80          |
| 308608      | conserved hypothetical protein-                                            | 51          | 22          | 30          | 25          | 102         | 80          |
| 579355      | conserved hypothetical protein-                                            | 51          | 22          | 30          | 25          | 102         | 80          |
| 670819      | conserved hypothetical protein-                                            | 51          | 22          | 30          | 25          | 102         | 80          |
| 751178      | conserved hypothetical protein-                                            | 51          | 22          | 30          | 25          | 102         | 80          |
| 655568      | C-5 cytosine-specific DNA methylase family protein-                        | 63          | 10          | 14          | 46          | 81          | 64          |
| 202133      | conserved hypothetical protein-                                            | 31          | 42          | 58          | 4           | 123         | 97          |
| 412170      | conserved hypothetical protein-                                            | 64          | 9           | 12          | 49          | 78          | 61          |



|        |                                                                                   |    |    |    |    |     |    |
|--------|-----------------------------------------------------------------------------------|----|----|----|----|-----|----|
| 462651 | 3-beta hydroxysteroid dehydrogenase/isomerase family protein-                     | 64 | 9  | 12 | 49 | 78  | 61 |
| 774469 | 3-beta hydroxysteroid dehydrogenase/isomerase family protein-                     | 64 | 9  | 12 | 49 | 78  | 61 |
| 81705  | conserved hypothetical protein-                                                   | 64 | 9  | 12 | 49 | 78  | 61 |
| 407997 | winged helix DNA-binding domain protein-                                          | 53 | 20 | 27 | 28 | 99  | 78 |
| 360339 | conserved hypothetical protein-                                                   | 66 | 7  | 10 | 54 | 73  | 57 |
| 701454 | conserved hypothetical protein-                                                   | 66 | 7  | 10 | 54 | 73  | 57 |
| 393530 | conserved hypothetical protein-                                                   | 62 | 11 | 15 | 45 | 82  | 65 |
| 393531 | helix-turn-helix family protein-                                                  | 62 | 11 | 15 | 45 | 82  | 65 |
| 256202 | bacterial group 3 Ig-like domain protein-                                         | 29 | 44 | 60 | 3  | 124 | 98 |
| 414126 | conserved hypothetical protein-                                                   | 29 | 44 | 60 | 3  | 124 | 98 |
| 783992 | conserved hypothetical protein-                                                   | 29 | 44 | 60 | 3  | 124 | 98 |
| 104336 | putative gp1.2-                                                                   | 65 | 8  | 11 | 52 | 75  | 59 |
| 15761  | conserved hypothetical protein-                                                   | 65 | 8  | 11 | 52 | 75  | 59 |
| 20948  | transglycosylase SLT domain protein-                                              | 65 | 8  | 11 | 52 | 75  | 59 |
| 327491 | conserved hypothetical protein-                                                   | 65 | 8  | 11 | 52 | 75  | 59 |
| 41443  | conserved hypothetical protein-                                                   | 65 | 8  | 11 | 52 | 75  | 59 |
| 420385 | conserved hypothetical protein-                                                   | 65 | 8  | 11 | 52 | 75  | 59 |
| 575247 | conserved hypothetical protein-                                                   | 65 | 8  | 11 | 52 | 75  | 59 |
| 745622 | HNH endonuclease family protein-                                                  | 65 | 8  | 11 | 52 | 75  | 59 |
| 783760 | HNH endonuclease family protein-                                                  | 65 | 8  | 11 | 52 | 75  | 59 |
| 806952 | putative gp1.2-                                                                   | 65 | 8  | 11 | 52 | 75  | 59 |
| 806971 | transglycosylase SLT domain protein-                                              | 65 | 8  | 11 | 52 | 75  | 59 |
| 692344 | small Multidrug Resistance family protein-                                        | 64 | 9  | 12 | 50 | 77  | 61 |
| 136990 | conserved hypothetical protein-                                                   | 30 | 43 | 59 | 4  | 123 | 97 |
| 492219 | glycosyltransferase 25 family protein-                                            | 58 | 15 | 21 | 38 | 89  | 70 |
| 676854 | miro-like family protein-                                                         | 65 | 8  | 11 | 53 | 74  | 58 |
| 736340 | sel1 repeat family protein-                                                       | 41 | 32 | 44 | 14 | 113 | 89 |
| 192732 | glycosyl transferases group 1 family protein-                                     | 28 | 45 | 62 | 3  | 124 | 98 |
| 282787 | glycosyl transferase 2 family protein-                                            | 28 | 45 | 62 | 3  | 124 | 98 |
| 671238 | polysaccharide deacetylase family protein-                                        | 28 | 45 | 62 | 3  | 124 | 98 |
| 961    | conserved hypothetical protein-                                                   | 28 | 45 | 62 | 3  | 124 | 98 |
| 791818 | flagellar system-associated repeat family protein-                                | 32 | 41 | 56 | 6  | 121 | 95 |
| 109583 | phage portal protein, HK97 family-                                                | 63 | 10 | 14 | 49 | 78  | 61 |
| 443917 | conserved hypothetical protein-                                                   | 63 | 10 | 14 | 49 | 78  | 61 |
| 806959 | phage portal protein, HK97 family-                                                | 63 | 10 | 14 | 49 | 78  | 61 |
| 103181 | conserved hypothetical protein-                                                   | 64 | 9  | 12 | 52 | 75  | 59 |
| 233840 | conserved hypothetical protein-                                                   | 64 | 9  | 12 | 52 | 75  | 59 |
| 276166 | BRO family, N-terminal domain protein-                                            | 64 | 9  | 12 | 52 | 75  | 59 |
| 287845 | putative membrane protein-                                                        | 64 | 9  | 12 | 52 | 75  | 59 |
| 301812 | conserved hypothetical protein-                                                   | 64 | 9  | 12 | 52 | 75  | 59 |
| 318814 | conserved hypothetical protein-                                                   | 64 | 9  | 12 | 52 | 75  | 59 |
| 37413  | peptidase S24-like family protein-                                                | 64 | 9  | 12 | 52 | 75  | 59 |
| 618690 | phage major capsid protein, HK97 family-                                          | 64 | 9  | 12 | 52 | 75  | 59 |
| 669584 | conserved hypothetical protein-                                                   | 64 | 9  | 12 | 52 | 75  | 59 |
| 707346 | conserved hypothetical protein-                                                   | 64 | 9  | 12 | 52 | 75  | 59 |
| 755759 | conserved hypothetical protein-                                                   | 64 | 9  | 12 | 52 | 75  | 59 |
| 81703  | phage/plasmid replication , gene II/X family protein-                             | 64 | 9  | 12 | 52 | 75  | 59 |
| 40390  | type I secretion C-terminal target domain protein-                                | 43 | 30 | 41 | 17 | 110 | 87 |
| 385580 | conserved hypothetical protein-                                                   | 62 | 11 | 15 | 47 | 80  | 63 |
| 389976 | conserved hypothetical protein-                                                   | 29 | 44 | 60 | 4  | 123 | 97 |
| 808261 | conserved hypothetical protein-                                                   | 29 | 44 | 60 | 4  | 123 | 97 |
| 195547 | putative membrane protein-                                                        | 42 | 31 | 42 | 16 | 111 | 87 |
| 238887 | pyridine nucleotide-disulfide oxidoreductase family protein-                      | 42 | 31 | 42 | 16 | 111 | 87 |
| 705873 | pyridine nucleotide-disulfide oxidoreductase family protein-                      | 42 | 31 | 42 | 16 | 111 | 87 |
| 736845 | putative transposase for insertion sequence element IS1086 domain protein-        | 49 | 24 | 33 | 25 | 102 | 80 |
| 695155 | conserved hypothetical protein-                                                   | 64 | 9  | 12 | 53 | 74  | 58 |
| 447234 | conserved hypothetical protein-                                                   | 49 | 24 | 33 | 26 | 101 | 80 |
| 174334 | efflux transporter, outer membrane factor (OMF) lipoprotein, NodT family protein- | 42 | 31 | 42 | 17 | 110 | 87 |
| 755119 | outer membrane transport family protein-                                          | 42 | 31 | 42 | 17 | 110 | 87 |
| 109582 | phage Terminase family protein-                                                   | 62 | 11 | 15 | 49 | 78  | 61 |
| 287221 | phage Terminase family protein-                                                   | 62 | 11 | 15 | 49 | 78  | 61 |
| 499299 | type I secretion C-terminal target domain protein-                                | 62 | 11 | 15 | 49 | 78  | 61 |
| 714886 | phage Terminase family protein-                                                   | 62 | 11 | 15 | 49 | 78  | 61 |
| 634610 | ankyrin repeats family protein-                                                   | 25 | 48 | 66 | 2  | 125 | 98 |
| 230978 | conserved hypothetical protein-                                                   | 51 | 22 | 30 | 29 | 98  | 77 |
| 28328  | conserved hypothetical protein-                                                   | 50 | 23 | 32 | 28 | 99  | 78 |
| 496798 | mandelamide hydrolase-                                                            | 50 | 23 | 32 | 28 | 99  | 78 |
| 581747 | transposase domain protein-                                                       | 28 | 45 | 62 | 4  | 123 | 97 |
| 736339 | conserved hypothetical protein-                                                   | 41 | 32 | 44 | 16 | 111 | 87 |
| 191314 | cro/C1-type HTH DNA-binding domain protein-                                       | 45 | 28 | 38 | 21 | 106 | 83 |
| 452088 | putative file-                                                                    | 34 | 39 | 53 | 9  | 118 | 93 |
| 629765 | conserved hypothetical protein-                                                   | 34 | 39 | 53 | 9  | 118 | 93 |
| 557419 | phage/plasmid replication , gene II/X family protein-                             | 64 | 9  | 12 | 54 | 73  | 57 |
| 792184 | conserved hypothetical protein-                                                   | 37 | 36 | 49 | 12 | 115 | 91 |
| 304557 | conserved hypothetical protein-                                                   | 46 | 27 | 37 | 22 | 105 | 83 |
| 103180 | dnaB-like helicase C terminal domain protein-                                     | 63 | 10 | 14 | 52 | 75  | 59 |
| 127370 | conserved hypothetical protein-                                                   | 63 | 10 | 14 | 52 | 75  | 59 |
| 20940  | conserved hypothetical protein-                                                   | 63 | 10 | 14 | 52 | 75  | 59 |
| 318800 | conserved hypothetical protein-                                                   | 63 | 10 | 14 | 52 | 75  | 59 |
| 318806 | conserved hypothetical protein-                                                   | 63 | 10 | 14 | 52 | 75  | 59 |
| 318821 | conserved hypothetical protein-                                                   | 63 | 10 | 14 | 52 | 75  | 59 |
| 41462  | conserved hypothetical protein-                                                   | 63 | 10 | 14 | 52 | 75  | 59 |
| 428946 | phage gp6-like head-tail connector family protein-                                | 63 | 10 | 14 | 52 | 75  | 59 |
| 428971 | conserved hypothetical protein-                                                   | 63 | 10 | 14 | 52 | 75  | 59 |
| 439610 | conserved hypothetical protein-                                                   | 63 | 10 | 14 | 52 | 75  | 59 |
| 688438 | conserved hypothetical protein-                                                   | 63 | 10 | 14 | 52 | 75  | 59 |
| 695176 | dnaB-like helicase C terminal domain protein-                                     | 63 | 10 | 14 | 52 | 75  | 59 |
| 721310 | conserved hypothetical protein-                                                   | 63 | 10 | 14 | 52 | 75  | 59 |
| 733838 | phage prohead protease, HK97 family-                                              | 63 | 10 | 14 | 52 | 75  | 59 |
| 806955 | conserved hypothetical protein-                                                   | 63 | 10 | 14 | 52 | 75  | 59 |
| 98839  | conserved hypothetical protein-                                                   | 63 | 10 | 14 | 52 | 75  | 59 |
| 435934 | putative gp77-                                                                    | 38 | 35 | 48 | 13 | 114 | 90 |
| 724670 | conserved hypothetical protein-                                                   | 49 | 24 | 33 | 27 | 100 | 79 |
| 805198 | bacterial regulatory, luxR family protein-                                        | 49 | 24 | 33 | 27 | 100 | 79 |
| 714866 | conserved hypothetical protein-                                                   | 61 | 12 | 16 | 48 | 79  | 62 |

|        |                                                                                   |    |    |    |    |     |    |
|--------|-----------------------------------------------------------------------------------|----|----|----|----|-----|----|
| 356765 | efflux transporter, outer membrane factor (OMF) lipoprotein, NodT family protein- | 47 | 26 | 36 | 24 | 103 | 81 |
| 604295 | KR domain protein-                                                                | 47 | 26 | 36 | 24 | 103 | 81 |
| 530810 | conserved hypothetical protein-                                                   | 60 | 13 | 18 | 46 | 81  | 64 |
| 500829 | BAAT / Acyl-CoA thioester hydrolase C terminal family protein-                    | 42 | 31 | 42 | 18 | 109 | 86 |
| 66358  | acetyl xylan esterase family protein-                                             | 42 | 31 | 42 | 18 | 109 | 86 |
| 6553   | conserved hypothetical protein-                                                   | 58 | 15 | 21 | 42 | 85  | 67 |
| 266615 | phage head-tail joining family protein-                                           | 62 | 11 | 15 | 51 | 76  | 60 |
| 804733 | AAA domain protein-                                                               | 50 | 23 | 32 | 29 | 98  | 77 |
| 90541  | conserved hypothetical protein-                                                   | 50 | 23 | 32 | 29 | 98  | 77 |
| 197234 | KR domain protein-                                                                | 73 | 0  | 0  | 85 | 42  | 33 |
| 197235 | cytidyltransferase family protein-                                                | 73 | 0  | 0  | 85 | 42  | 33 |
| 445187 | phage lysozyme family protein-                                                    | 61 | 12 | 16 | 49 | 78  | 61 |
| 534497 | phage lysozyme family protein-                                                    | 61 | 12 | 16 | 49 | 78  | 61 |
| 504091 | cytidine and deoxycytidylate deaminase zinc-binding region family protein-        | 24 | 49 | 67 | 2  | 125 | 98 |
| 196449 | transposase family protein-                                                       | 60 | 13 | 18 | 47 | 80  | 63 |
| 139242 | conserved hypothetical protein-                                                   | 32 | 41 | 56 | 8  | 119 | 94 |
| 634479 | transposase IS66 family protein-                                                  | 64 | 9  | 12 | 56 | 71  | 56 |
| 90095  | putative transposase-                                                             | 64 | 9  | 12 | 56 | 71  | 56 |
| 224227 | isochorismatase family protein-                                                   | 38 | 35 | 48 | 14 | 113 | 89 |
| 303845 | lysR substrate binding domain protein-                                            | 38 | 35 | 48 | 14 | 113 | 89 |
| 572242 | antibiotic biosynthesis monooxygenase family protein-                             | 38 | 35 | 48 | 14 | 113 | 89 |
| 600576 | RHS Repeat family protein-                                                        | 38 | 35 | 48 | 14 | 113 | 89 |
| 155892 | putative membrane protein-                                                        | 51 | 22 | 30 | 31 | 96  | 76 |
| 25317  | mu transposase, C-terminal family protein-                                        | 51 | 22 | 30 | 31 | 96  | 76 |
| 514726 | conserved hypothetical protein-                                                   | 51 | 22 | 30 | 31 | 96  | 76 |
| 737906 | conserved hypothetical protein-                                                   | 66 | 7  | 10 | 61 | 66  | 52 |
| 190197 | ABC transporter, substrate-binding, aliphatic sulfonates family protein-          | 35 | 38 | 52 | 11 | 116 | 91 |
| 390271 | bacterial Ig-like domain family protein-                                          | 37 | 36 | 49 | 13 | 114 | 90 |
| 607397 | putative file-                                                                    | 37 | 36 | 49 | 13 | 114 | 90 |
| 156827 | conserved hypothetical protein-                                                   | 52 | 21 | 29 | 33 | 94  | 74 |
| 219486 | mandelamide hydrolase-                                                            | 49 | 24 | 33 | 28 | 99  | 78 |
| 55125  | polysaccharide biosynthesis family protein-                                       | 73 | 0  | 0  | 86 | 41  | 32 |
| 563378 | conserved hypothetical protein-                                                   | 73 | 0  | 0  | 86 | 41  | 32 |
| 371042 | conserved hypothetical protein-                                                   | 62 | 11 | 15 | 52 | 75  | 59 |
| 445146 | conserved hypothetical protein-                                                   | 62 | 11 | 15 | 52 | 75  | 59 |
| 680510 | conserved hypothetical protein-                                                   | 62 | 11 | 15 | 52 | 75  | 59 |
| 99544  | conserved hypothetical protein-                                                   | 62 | 11 | 15 | 52 | 75  | 59 |
| 563114 | conserved hypothetical protein-                                                   | 72 | 1  | 1  | 81 | 46  | 36 |
| 364603 | conserved hypothetical protein-                                                   | 46 | 27 | 37 | 24 | 103 | 81 |
| 62506  | acyl-CoA dehydrogenase, N-terminal domain protein-                                | 46 | 27 | 37 | 24 | 103 | 81 |
| 636982 | conserved hypothetical protein-                                                   | 46 | 27 | 37 | 24 | 103 | 81 |
| 653207 | histidine phosphatase super family protein-                                       | 46 | 27 | 37 | 24 | 103 | 81 |
| 727321 | bacterial Ig-like domain family protein-                                          | 41 | 32 | 44 | 18 | 109 | 86 |
| 714863 | putative cell division protein-                                                   | 60 | 13 | 18 | 48 | 79  | 62 |
| 692442 | tnsA endonuclease N terminal family protein-                                      | 50 | 23 | 32 | 30 | 97  | 76 |
| 143371 | conserved hypothetical protein-                                                   | 58 | 15 | 21 | 44 | 83  | 65 |
| 72415  | putative iron uptake ABC transporter permease domain protein-                     | 47 | 26 | 36 | 26 | 101 | 80 |
| 220924 | impA-related N-terminal family protein-                                           | 23 | 50 | 68 | 2  | 125 | 98 |
| 659432 | malonate transporter, MadL subunit-                                               | 23 | 50 | 68 | 2  | 125 | 98 |
| 711922 | malonate transporter, MadM subunit-                                               | 23 | 50 | 68 | 2  | 125 | 98 |
| 283419 | phosphotransferase enzyme family protein-                                         | 46 | 27 | 37 | 25 | 102 | 80 |
| 415840 | rhs element Vgr family protein-                                                   | 40 | 33 | 45 | 17 | 110 | 87 |
| 452043 | conserved hypothetical protein-                                                   | 40 | 33 | 45 | 17 | 110 | 87 |
| 733161 | oxidoreductase, NAD-binding Rossmann fold family protein-                         | 73 | 0  | 0  | 87 | 40  | 31 |
| 733163 | capsule polysaccharide biosynthesis family protein-                               | 73 | 0  | 0  | 87 | 40  | 31 |
| 74448  | glycosyl transferases group 1 family protein-                                     | 73 | 0  | 0  | 87 | 40  | 31 |
| 409536 | conserved hypothetical protein-                                                   | 21 | 52 | 71 | 1  | 126 | 99 |
| 779773 | metA-pathway of phenol degradation family protein-                                | 21 | 52 | 71 | 1  | 126 | 99 |
| 522766 | amidohydrolase family protein-                                                    | 38 | 35 | 48 | 15 | 112 | 88 |
| 439424 | filamentous hemagglutinin family N-terminal domain protein-                       | 62 | 11 | 15 | 53 | 74  | 58 |
| 807509 | conserved hypothetical protein-                                                   | 62 | 11 | 15 | 53 | 74  | 58 |
| 551083 | flagellar system-associated repeat family protein-                                | 33 | 40 | 55 | 10 | 117 | 92 |
| 194838 | conserved hypothetical protein-                                                   | 61 | 12 | 16 | 51 | 76  | 60 |
| 447842 | conserved hypothetical protein-                                                   | 51 | 22 | 30 | 33 | 94  | 74 |
| 20543  | conserved hypothetical protein-                                                   | 60 | 13 | 18 | 49 | 78  | 61 |
| 20715  | conserved hypothetical protein-                                                   | 60 | 13 | 18 | 49 | 78  | 61 |
| 231964 | transposase family protein-                                                       | 64 | 9  | 12 | 58 | 69  | 54 |
| 240030 | phage/plasmid replication, gene II/X family protein-                              | 64 | 9  | 12 | 58 | 69  | 54 |
| 253784 | phage/plasmid replication, gene II/X family protein-                              | 64 | 9  | 12 | 58 | 69  | 54 |
| 278202 | conserved hypothetical protein-                                                   | 58 | 15 | 21 | 45 | 82  | 65 |
| 799674 | conserved hypothetical protein-                                                   | 58 | 15 | 21 | 45 | 82  | 65 |
| 589537 | conserved hypothetical protein-                                                   | 40 | 33 | 45 | 18 | 109 | 86 |
| 27820  | succinate-semialdehyde dehydrogenase family protein-                              | 24 | 49 | 67 | 3  | 124 | 98 |
| 121019 | bacterial regulatory, luxR family protein-                                        | 49 | 24 | 33 | 30 | 97  | 76 |
| 715886 | conserved hypothetical protein-                                                   | 41 | 32 | 44 | 19 | 108 | 85 |
| 732223 | conserved hypothetical protein-                                                   | 41 | 32 | 44 | 19 | 108 | 85 |
| 629589 | catalase-related immune-responsive family protein-                                | 48 | 25 | 34 | 29 | 98  | 77 |
| 805134 | inner membrane protein Yjch-                                                      | 46 | 27 | 37 | 26 | 101 | 80 |
| 806568 | tonB dependent receptor family protein-                                           | 46 | 27 | 37 | 26 | 101 | 80 |
| 120154 | conserved hypothetical protein-                                                   | 50 | 23 | 32 | 32 | 95  | 75 |
| 57445  | conserved hypothetical protein-                                                   | 50 | 23 | 32 | 32 | 95  | 75 |
| 760307 | conserved hypothetical protein-                                                   | 50 | 23 | 32 | 32 | 95  | 75 |
| 301290 | bacterial transferase hexapeptide family protein-                                 | 72 | 1  | 1  | 83 | 44  | 35 |
| 428297 | glycosyl transferase 4 family protein-                                            | 72 | 1  | 1  | 83 | 44  | 35 |
| 806666 | 3-beta hydroxysteroid dehydrogenase/isomerase family protein-                     | 72 | 1  | 1  | 83 | 44  | 35 |
| 161833 | conserved hypothetical protein-                                                   | 39 | 34 | 47 | 17 | 110 | 87 |
| 225370 | bacterial Ig-like domain family protein-                                          | 39 | 34 | 47 | 17 | 110 | 87 |
| 680271 | putative membrane protein-                                                        | 62 | 11 | 15 | 54 | 73  | 57 |
| 806667 | glycosyl transferases group 1 family protein-                                     | 72 | 1  | 1  | 84 | 43  | 34 |
| 159825 | ompA family protein-                                                              | 22 | 51 | 70 | 2  | 125 | 98 |
| 27824  | luciferase-like monooxygenase family protein-                                     | 22 | 51 | 70 | 2  | 125 | 98 |
| 341066 | conserved hypothetical protein-                                                   | 22 | 51 | 70 | 2  | 125 | 98 |
| 349797 | aldehyde dehydrogenase family protein-                                            | 22 | 51 | 70 | 2  | 125 | 98 |
| 429309 | carboxymuconolactone decarboxylase family protein-                                | 22 | 51 | 70 | 2  | 125 | 98 |
| 484559 | type VI secretion ATPase, ClpV1 family-                                           | 22 | 51 | 70 | 2  | 125 | 98 |

|        |                                                                                     |    |    |    |    |     |     |
|--------|-------------------------------------------------------------------------------------|----|----|----|----|-----|-----|
| 495476 | conserved hypothetical protein-                                                     | 22 | 51 | 70 | 2  | 125 | 98  |
| 50389  | type IV/VI secretion system , DotU family domain protein-                           | 22 | 51 | 70 | 2  | 125 | 98  |
| 670209 | permease for cytosine/purines, uracil, thiamine, allantoin family protein-          | 22 | 51 | 70 | 2  | 125 | 98  |
| 738276 | conserved hypothetical protein-                                                     | 22 | 51 | 70 | 2  | 125 | 98  |
| 738879 | conserved hypothetical protein-                                                     | 22 | 51 | 70 | 2  | 125 | 98  |
| 104331 | terminase small subunit-                                                            | 61 | 12 | 16 | 52 | 75  | 59  |
| 318785 | conserved hypothetical protein-                                                     | 61 | 12 | 16 | 52 | 75  | 59  |
| 371029 | terminase small subunit-                                                            | 61 | 12 | 16 | 52 | 75  | 59  |
| 474389 | conserved hypothetical protein-                                                     | 61 | 12 | 16 | 52 | 75  | 59  |
| 747571 | terminase small subunit-                                                            | 61 | 12 | 16 | 52 | 75  | 59  |
| 764514 | conserved hypothetical protein-                                                     | 61 | 12 | 16 | 52 | 75  | 59  |
| 806969 | conserved hypothetical protein-                                                     | 61 | 12 | 16 | 52 | 75  | 59  |
| 95299  | ninB family protein-                                                                | 61 | 12 | 16 | 52 | 75  | 59  |
| 98825  | conserved hypothetical protein-                                                     | 61 | 12 | 16 | 52 | 75  | 59  |
| 98837  | terminase small subunit-                                                            | 61 | 12 | 16 | 52 | 75  | 59  |
| 393116 | conserved hypothetical protein-                                                     | 62 | 11 | 15 | 55 | 72  | 57  |
| 411349 | conserved hypothetical protein-                                                     | 62 | 11 | 15 | 55 | 72  | 57  |
| 122373 | conserved hypothetical protein-                                                     | 20 | 53 | 73 | 1  | 126 | 99  |
| 147332 | conserved hypothetical protein-                                                     | 20 | 53 | 73 | 1  | 126 | 99  |
| 160217 | conserved hypothetical protein-                                                     | 20 | 53 | 73 | 1  | 126 | 99  |
| 183097 | conserved hypothetical protein-                                                     | 20 | 53 | 73 | 1  | 126 | 99  |
| 21319  | conserved hypothetical protein-                                                     | 20 | 53 | 73 | 1  | 126 | 99  |
| 344128 | conserved hypothetical protein-                                                     | 20 | 53 | 73 | 1  | 126 | 99  |
| 3746   | conserved hypothetical protein-                                                     | 20 | 53 | 73 | 1  | 126 | 99  |
| 3749   | conserved hypothetical protein-                                                     | 20 | 53 | 73 | 1  | 126 | 99  |
| 422852 | conserved hypothetical protein-                                                     | 20 | 53 | 73 | 1  | 126 | 99  |
| 440185 | conserved hypothetical protein-                                                     | 20 | 53 | 73 | 1  | 126 | 99  |
| 444134 | conserved hypothetical protein-                                                     | 20 | 53 | 73 | 1  | 126 | 99  |
| 574684 | conserved hypothetical protein-                                                     | 20 | 53 | 73 | 1  | 126 | 99  |
| 696575 | conserved hypothetical protein-                                                     | 20 | 53 | 73 | 1  | 126 | 99  |
| 696669 | conserved hypothetical protein-                                                     | 20 | 53 | 73 | 1  | 126 | 99  |
| 720075 | conserved hypothetical protein-                                                     | 20 | 53 | 73 | 1  | 126 | 99  |
| 724693 | conserved hypothetical protein-                                                     | 20 | 53 | 73 | 1  | 126 | 99  |
| 728639 | conserved hypothetical protein-                                                     | 20 | 53 | 73 | 1  | 126 | 99  |
| 751239 | conserved hypothetical protein-                                                     | 20 | 53 | 73 | 1  | 126 | 99  |
| 754223 | conserved hypothetical protein-                                                     | 20 | 53 | 73 | 1  | 126 | 99  |
| 762552 | conserved hypothetical protein-                                                     | 20 | 53 | 73 | 1  | 126 | 99  |
| 533180 | conserved hypothetical protein-                                                     | 47 | 26 | 36 | 28 | 99  | 78  |
| 320879 | hicB family protein-                                                                | 5  | 7  | 70 | 57 | 45  | 45  |
| 478831 | conserved hypothetical protein-                                                     | 53 | 20 | 27 | 37 | 90  | 71  |
| 301974 | conserved hypothetical protein-                                                     | 64 | 9  | 12 | 59 | 68  | 54  |
| 123635 | conserved hypothetical protein-                                                     | 61 | 12 | 16 | 53 | 74  | 58  |
| 187025 | conserved hypothetical protein-                                                     | 61 | 12 | 16 | 53 | 74  | 58  |
| 258623 | bacterial regulatory, tetR family protein-                                          | 52 | 21 | 29 | 36 | 91  | 72  |
| 540447 | amino acid permease family protein-                                                 | 52 | 21 | 29 | 36 | 91  | 72  |
| 792473 | conserved hypothetical protein-                                                     | 52 | 21 | 29 | 36 | 91  | 72  |
| 797025 | hypothetical protein-                                                               | 52 | 21 | 29 | 36 | 91  | 72  |
| 807540 | conserved hypothetical protein-                                                     | 52 | 21 | 29 | 36 | 91  | 72  |
| 96332  | phage antirepressor KILAC domain protein-                                           | 52 | 21 | 29 | 36 | 91  | 72  |
| 260711 | putative membrane protein-                                                          | 34 | 39 | 53 | 12 | 115 | 91  |
| 266613 | conserved hypothetical protein-                                                     | 60 | 13 | 18 | 51 | 76  | 60  |
| 266614 | conserved hypothetical protein-                                                     | 60 | 13 | 18 | 51 | 76  | 60  |
| 714878 | conserved hypothetical protein-                                                     | 60 | 13 | 18 | 51 | 76  | 60  |
| 714879 | conserved hypothetical protein-                                                     | 60 | 13 | 18 | 51 | 76  | 60  |
| 714880 | phage head-tail joining family protein-                                             | 60 | 13 | 18 | 51 | 76  | 60  |
| 747562 | conserved hypothetical protein-                                                     | 60 | 13 | 18 | 51 | 76  | 60  |
| 747564 | phage head-tail joining family protein-                                             | 60 | 13 | 18 | 51 | 76  | 60  |
| 806965 | conserved hypothetical protein-                                                     | 60 | 13 | 18 | 51 | 76  | 60  |
| 95312  | conserved hypothetical protein-                                                     | 60 | 13 | 18 | 51 | 76  | 60  |
| 243670 | proton antiporter-2 family protein-                                                 | 36 | 37 | 51 | 14 | 113 | 89  |
| 503558 | transporter, betaine/carnitine/choline transporter family protein-                  | 53 | 20 | 27 | 38 | 89  | 70  |
| 386945 | transposase family protein-                                                         | 58 | 15 | 21 | 47 | 80  | 63  |
| 696546 | rhs element Vgr family protein-                                                     | 40 | 33 | 45 | 19 | 108 | 85  |
| 18641  | major Facilitator Superfamily protein-                                              | 23 | 50 | 68 | 3  | 124 | 98  |
| 589046 | aldehyde dehydrogenase family protein-                                              | 23 | 50 | 68 | 3  | 124 | 98  |
| 658764 | binding-protein-dependent transport system inner membrane component family protein- | 33 | 40 | 55 | 11 | 116 | 91  |
| 530437 | conserved hypothetical protein-                                                     | 62 | 11 | 15 | 56 | 71  | 56  |
| 596812 | traM recognition site of TraD and TraG family protein-                              | 62 | 11 | 15 | 56 | 71  | 56  |
| 804896 | conserved hypothetical protein-                                                     | 62 | 11 | 15 | 56 | 71  | 56  |
| 612306 | conserved hypothetical protein-                                                     | 38 | 35 | 48 | 17 | 110 | 87  |
| 633424 | phage integrase family protein-                                                     | 28 | 45 | 62 | 7  | 120 | 94  |
| 259699 | transglycosylase SLT domain protein-                                                | 61 | 12 | 16 | 54 | 73  | 57  |
| 466278 | conserved hypothetical protein-                                                     | 61 | 12 | 16 | 54 | 73  | 57  |
| 498524 | conserved hypothetical protein-                                                     | 61 | 12 | 16 | 54 | 73  | 57  |
| 513127 | type-F conjugative transfer system pilin assembly protein TrbC-                     | 61 | 12 | 16 | 54 | 73  | 57  |
| 52003  | parB/RepB/SpoJ family partition domain protein-                                     | 61 | 12 | 16 | 54 | 73  | 57  |
| 653641 | conserved hypothetical protein-                                                     | 61 | 12 | 16 | 54 | 73  | 57  |
| 75644  | conserved hypothetical protein-                                                     | 61 | 12 | 16 | 54 | 73  | 57  |
| 804886 | helix-turn-helix family protein-                                                    | 61 | 12 | 16 | 54 | 73  | 57  |
| 804889 | conserved hypothetical protein-                                                     | 61 | 12 | 16 | 54 | 73  | 57  |
| 807466 | putative membrane protein-                                                          | 61 | 12 | 16 | 54 | 73  | 57  |
| 807469 | traK family protein-                                                                | 61 | 12 | 16 | 54 | 73  | 57  |
| 131277 | conserved hypothetical protein-                                                     | 17 | 56 | 77 | 0  | 127 | 100 |
| 322235 | peptidase_C39 like family protein-                                                  | 17 | 56 | 77 | 0  | 127 | 100 |
| 742749 | putative pilus subunit FilA-                                                        | 17 | 56 | 77 | 0  | 127 | 100 |
| 456320 | proton antiporter-2 family protein-                                                 | 36 | 37 | 51 | 15 | 112 | 88  |
| 576874 | conserved hypothetical protein-                                                     | 64 | 9  | 12 | 61 | 66  | 52  |
| 135785 | D-alanyl-D-alanine carboxypeptidase family protein-                                 | 21 | 52 | 71 | 2  | 125 | 98  |
| 151315 | conserved hypothetical protein-                                                     | 21 | 52 | 71 | 2  | 125 | 98  |
| 257425 | conserved hypothetical protein-                                                     | 21 | 52 | 71 | 2  | 125 | 98  |
| 263176 | conserved hypothetical protein-                                                     | 21 | 52 | 71 | 2  | 125 | 98  |
| 322234 | metA-pathway of phenol degradation family protein-                                  | 21 | 52 | 71 | 2  | 125 | 98  |
| 392566 | conserved hypothetical protein-                                                     | 21 | 52 | 71 | 2  | 125 | 98  |
| 619121 | conserved hypothetical protein-                                                     | 21 | 52 | 71 | 2  | 125 | 98  |
| 700712 | conserved hypothetical protein-                                                     | 21 | 52 | 71 | 2  | 125 | 98  |

|        |                                                                                         |    |    |    |    |     |    |
|--------|-----------------------------------------------------------------------------------------|----|----|----|----|-----|----|
| 318790 | phage head-tail joining family protein-                                                 | 60 | 13 | 18 | 52 | 75  | 59 |
| 574620 | conserved hypothetical protein-                                                         | 60 | 13 | 18 | 52 | 75  | 59 |
| 733834 | phage head-tail joining family protein-                                                 | 60 | 13 | 18 | 52 | 75  | 59 |
| 374679 | catalase-related immune-responsive family protein-                                      | 47 | 26 | 36 | 29 | 98  | 77 |
| 217484 | putative chromate transporter-                                                          | 52 | 21 | 29 | 37 | 90  | 71 |
| 269608 | tolerance to group A colicins, single-stranded filamentous DNA phage, required for OM i | 52 | 21 | 29 | 37 | 90  | 71 |
| 341276 | conserved hypothetical protein-                                                         | 52 | 21 | 29 | 37 | 90  | 71 |
| 491524 | FAD dependent oxidoreductase family protein-                                            | 52 | 21 | 29 | 37 | 90  | 71 |
| 513902 | transporter, betaine/carnitine/choline transporter family protein-                      | 52 | 21 | 29 | 37 | 90  | 71 |
| 52186  | conserved hypothetical protein-                                                         | 52 | 21 | 29 | 37 | 90  | 71 |
| 522759 | conserved hypothetical protein-                                                         | 52 | 21 | 29 | 37 | 90  | 71 |
| 266491 | phage integrase family protein-                                                         | 24 | 49 | 67 | 4  | 123 | 97 |
| 416313 | phage integrase family protein-                                                         | 24 | 49 | 67 | 4  | 123 | 97 |
| 653217 | acetoacetate decarboxylase family protein-                                              | 46 | 27 | 37 | 28 | 99  | 78 |
| 793418 | NAD(P)H quinone oxidoreductase, PIG3 family protein-                                    | 46 | 27 | 37 | 28 | 99  | 78 |
| 189763 | conserved hypothetical protein-                                                         | 37 | 36 | 49 | 16 | 111 | 87 |
| 284333 | purine catabolism regulatory protein-like family protein-                               | 53 | 20 | 27 | 39 | 88  | 69 |
| 714572 | conserved hypothetical protein-                                                         | 35 | 38 | 52 | 14 | 113 | 89 |
| 486251 | conserved hypothetical protein-                                                         | 51 | 22 | 30 | 36 | 91  | 72 |
| 804856 | methylmalonate-semialdehyde dehydrogenase-                                              | 51 | 22 | 30 | 36 | 91  | 72 |
| 392572 | conserved hypothetical protein-                                                         | 19 | 54 | 74 | 1  | 126 | 99 |
| 397149 | putative glutamate 5-kinase-                                                            | 19 | 54 | 74 | 1  | 126 | 99 |
| 724549 | putative glutamate 5-kinase-                                                            | 19 | 54 | 74 | 1  | 126 | 99 |
| 747584 | putative membrane protein-                                                              | 63 | 10 | 14 | 59 | 68  | 54 |
| 454938 | BCCT transporter family protein-                                                        | 52 | 21 | 29 | 38 | 89  | 70 |
| 671701 | conserved hypothetical protein-                                                         | 52 | 21 | 29 | 38 | 89  | 70 |
| 67646  | conserved hypothetical protein-                                                         | 52 | 21 | 29 | 38 | 89  | 70 |
| 677513 | putative membrane protein-                                                              | 52 | 21 | 29 | 38 | 89  | 70 |
| 477594 | conserved hypothetical protein-                                                         | 25 | 48 | 66 | 5  | 122 | 96 |
| 562995 | conserved hypothetical protein-                                                         | 25 | 48 | 66 | 5  | 122 | 96 |
| 667656 | rhs element Vgr family protein-                                                         | 39 | 34 | 47 | 19 | 108 | 85 |
| 3745   | conserved hypothetical protein-                                                         | 32 | 41 | 56 | 11 | 116 | 91 |
| 134957 | conserved hypothetical protein-                                                         | 62 | 11 | 15 | 57 | 70  | 55 |
| 96668  | arc-like DNA binding domain protein-                                                    | 67 | 6  | 8  | 70 | 57  | 45 |
| 779402 | apolipoprotein III family protein-                                                      | 45 | 28 | 38 | 27 | 100 | 79 |
| 495482 | amino acid synthesis family protein-                                                    | 22 | 51 | 70 | 3  | 124 | 98 |
| 532305 | ndr family protein-                                                                     | 22 | 51 | 70 | 3  | 124 | 98 |
| 746397 | HTH domain protein-                                                                     | 22 | 51 | 70 | 3  | 124 | 98 |
| 746620 | conserved hypothetical protein-                                                         | 22 | 51 | 70 | 3  | 124 | 98 |
| 807177 | lysR substrate binding domain protein-                                                  | 22 | 51 | 70 | 3  | 124 | 98 |
| 119397 | traG-like, N-terminal region family protein-                                            | 61 | 12 | 16 | 55 | 72  | 57 |
| 285371 | putative lipoprotein-                                                                   | 61 | 12 | 16 | 55 | 72  | 57 |
| 381726 | conjugal relaxosome accessory transposon family protein-                                | 61 | 12 | 16 | 55 | 72  | 57 |
| 384718 | replicase family protein-                                                               | 61 | 12 | 16 | 55 | 72  | 57 |
| 393149 | conserved hypothetical protein-                                                         | 61 | 12 | 16 | 55 | 72  | 57 |
| 466277 | conserved hypothetical protein-                                                         | 61 | 12 | 16 | 55 | 72  | 57 |
| 515175 | putative membrane protein-                                                              | 61 | 12 | 16 | 55 | 72  | 57 |
| 525423 | conserved hypothetical protein-                                                         | 61 | 12 | 16 | 55 | 72  | 57 |
| 568807 | conserved hypothetical protein-                                                         | 61 | 12 | 16 | 55 | 72  | 57 |
| 569990 | hypothetical protein-                                                                   | 61 | 12 | 16 | 55 | 72  | 57 |
| 593685 | conserved hypothetical protein-                                                         | 61 | 12 | 16 | 55 | 72  | 57 |
| 692713 | conserved hypothetical protein-                                                         | 61 | 12 | 16 | 55 | 72  | 57 |
| 721884 | conserved hypothetical protein-                                                         | 61 | 12 | 16 | 55 | 72  | 57 |
| 754952 | conserved hypothetical protein-                                                         | 61 | 12 | 16 | 55 | 72  | 57 |
| 793832 | traE family protein-                                                                    | 61 | 12 | 16 | 55 | 72  | 57 |
| 807474 | type-IV secretion system protein TraC-                                                  | 61 | 12 | 16 | 55 | 72  | 57 |
| 807478 | traU family protein-                                                                    | 61 | 12 | 16 | 55 | 72  | 57 |
| 9205   | signal peptidase I-                                                                     | 61 | 12 | 16 | 55 | 72  | 57 |
| 9211   | bacterial conjugation TrbI-like family protein-                                         | 61 | 12 | 16 | 55 | 72  | 57 |
| 97858  | type IV conjugative transfer system protein TraV-                                       | 61 | 12 | 16 | 55 | 72  | 57 |
| 364436 | conserved hypothetical protein-                                                         | 37 | 36 | 49 | 17 | 110 | 87 |
| 672855 | conserved hypothetical protein-                                                         | 37 | 36 | 49 | 17 | 110 | 87 |
| 806950 | conserved hypothetical protein-                                                         | 64 | 9  | 12 | 62 | 65  | 51 |
| 49436  | conserved hypothetical protein-                                                         | 50 | 23 | 32 | 35 | 92  | 72 |
| 533099 | conserved hypothetical protein-                                                         | 50 | 23 | 32 | 35 | 92  | 72 |
| 715744 | bypass of Forespore C, N terminal family protein-                                       | 50 | 23 | 32 | 35 | 92  | 72 |
| 783444 | conserved hypothetical protein-                                                         | 50 | 23 | 32 | 35 | 92  | 72 |
| 183061 | resolvase, N terminal domain protein-                                                   | 61 | 12 | 16 | 56 | 71  | 56 |
| 301332 | conserved hypothetical protein-                                                         | 61 | 12 | 16 | 56 | 71  | 56 |
| 366041 | conserved hypothetical protein-                                                         | 61 | 12 | 16 | 56 | 71  | 56 |
| 385160 | conserved hypothetical protein-                                                         | 61 | 12 | 16 | 56 | 71  | 56 |
| 434779 | conserved hypothetical protein-                                                         | 61 | 12 | 16 | 56 | 71  | 56 |
| 49256  | cobQ/CobB/MinD/ParA nucleotide binding domain protein-                                  | 61 | 12 | 16 | 56 | 71  | 56 |
| 495948 | conserved hypothetical protein-                                                         | 61 | 12 | 16 | 56 | 71  | 56 |
| 569985 | transglycosylase SLT domain protein-                                                    | 61 | 12 | 16 | 56 | 71  | 56 |
| 636400 | conserved hypothetical protein-                                                         | 61 | 12 | 16 | 56 | 71  | 56 |
| 684285 | putative conjugal transfer domain protein-                                              | 61 | 12 | 16 | 56 | 71  | 56 |
| 75638  | thioredoxin-like domain protein-                                                        | 61 | 12 | 16 | 56 | 71  | 56 |
| 428118 | aldehyde dehydrogenase family protein-                                                  | 46 | 27 | 37 | 29 | 98  | 77 |
| 110372 | choline/ethanolamine kinase family protein-                                             | 72 | 1  | 1  | 87 | 40  | 31 |
| 640594 | conserved hypothetical protein-                                                         | 51 | 22 | 30 | 37 | 90  | 71 |
| 458722 | transposase C of IS166 homeodomain protein-                                             | 60 | 13 | 18 | 54 | 73  | 57 |
| 763104 | type IV conjugative transfer system protein TraL-                                       | 60 | 13 | 18 | 54 | 73  | 57 |
| 636420 | conserved hypothetical protein-                                                         | 63 | 10 | 14 | 60 | 67  | 53 |
| 193213 | conserved hypothetical protein-                                                         | 53 | 20 | 27 | 40 | 87  | 69 |
| 692158 | conserved hypothetical protein-                                                         | 53 | 20 | 27 | 40 | 87  | 69 |
| 565022 | conserved hypothetical protein-                                                         | 43 | 30 | 41 | 25 | 102 | 80 |
| 806150 | putative membrane protein-                                                              | 43 | 30 | 41 | 25 | 102 | 80 |
| 254389 | lysR substrate binding domain protein-                                                  | 20 | 53 | 73 | 2  | 125 | 98 |
| 519171 | conserved hypothetical protein-                                                         | 52 | 21 | 29 | 39 | 88  | 69 |
| 522652 | hypothetical protein-                                                                   | 52 | 21 | 29 | 39 | 88  | 69 |
| 724793 | conserved hypothetical protein-                                                         | 29 | 44 | 60 | 9  | 118 | 93 |
| 256330 | conserved hypothetical protein-                                                         | 56 | 17 | 23 | 46 | 81  | 64 |
| 575271 | putative phage-like protein-                                                            | 56 | 17 | 23 | 46 | 81  | 64 |
| 456575 | putative transposase-                                                                   | 67 | 6  | 8  | 71 | 56  | 44 |

|        |                                                                               |    |    |    |    |     |     |
|--------|-------------------------------------------------------------------------------|----|----|----|----|-----|-----|
| 289638 | putative membrane protein-                                                    | 63 | 10 | 14 | 61 | 66  | 52  |
| 431284 | phosphoadenosine phosphosulfate reductase family protein-                     | 53 | 20 | 27 | 41 | 86  | 68  |
| 106160 | polysaccharide biosynthesis/export family protein-                            | 18 | 55 | 75 | 1  | 126 | 99  |
| 131146 | polysaccharide biosynthesis/export family protein-                            | 18 | 55 | 75 | 1  | 126 | 99  |
| 1896   | polysaccharide biosynthesis/export family protein-                            | 18 | 55 | 75 | 1  | 126 | 99  |
| 19428  | polysaccharide biosynthesis/export family protein-                            | 18 | 55 | 75 | 1  | 126 | 99  |
| 22993  | polysaccharide biosynthesis/export family protein-                            | 18 | 55 | 75 | 1  | 126 | 99  |
| 255309 | polysaccharide biosynthesis/export family protein-                            | 18 | 55 | 75 | 1  | 126 | 99  |
| 279909 | polysaccharide biosynthesis/export family protein-                            | 18 | 55 | 75 | 1  | 126 | 99  |
| 428274 | tyrosine-protein kinase ptk-                                                  | 18 | 55 | 75 | 1  | 126 | 99  |
| 506059 | polysaccharide biosynthesis/export family protein-                            | 18 | 55 | 75 | 1  | 126 | 99  |
| 510361 | polysaccharide biosynthesis/export family protein-                            | 18 | 55 | 75 | 1  | 126 | 99  |
| 529257 | polysaccharide biosynthesis/export family protein-                            | 18 | 55 | 75 | 1  | 126 | 99  |
| 546409 | polysaccharide biosynthesis/export family protein-                            | 18 | 55 | 75 | 1  | 126 | 99  |
| 719202 | polysaccharide biosynthesis/export family protein-                            | 18 | 55 | 75 | 1  | 126 | 99  |
| 128341 | putative metal-dependent hydrolase domain protein-                            | 68 | 5  | 7  | 74 | 53  | 42  |
| 763217 | conserved hypothetical protein-                                               | 54 | 19 | 26 | 43 | 84  | 66  |
| 467109 | conserved hypothetical protein-                                               | 62 | 11 | 15 | 59 | 68  | 54  |
| 538871 | conserved hypothetical protein-                                               | 62 | 11 | 15 | 59 | 68  | 54  |
| 636359 | conserved hypothetical protein-                                               | 62 | 11 | 15 | 59 | 68  | 54  |
| 807517 | putative membrane protein-                                                    | 62 | 11 | 15 | 59 | 68  | 54  |
| 187359 | conserved hypothetical protein-                                               | 41 | 32 | 44 | 23 | 104 | 82  |
| 351587 | putative membrane protein-                                                    | 41 | 32 | 44 | 23 | 104 | 82  |
| 119310 | type-F conjugative transfer system protein TraW-                              | 61 | 12 | 16 | 57 | 70  | 55  |
| 301242 | conserved hypothetical protein-                                               | 61 | 12 | 16 | 57 | 70  | 55  |
| 301321 | conserved hypothetical protein-                                               | 61 | 12 | 16 | 57 | 70  | 55  |
| 381765 | conserved hypothetical protein-                                               | 61 | 12 | 16 | 57 | 70  | 55  |
| 384583 | putative lipoprotein-                                                         | 61 | 12 | 16 | 57 | 70  | 55  |
| 530399 | type-IV conjugative transfer system mating pair stabilisation family protein- | 61 | 12 | 16 | 57 | 70  | 55  |
| 624228 | dnal domain protein-                                                          | 61 | 12 | 16 | 57 | 70  | 55  |
| 651964 | hypothetical protein-                                                         | 61 | 12 | 16 | 57 | 70  | 55  |
| 743074 | conserved hypothetical protein-                                               | 61 | 12 | 16 | 57 | 70  | 55  |
| 763013 | conserved hypothetical protein-                                               | 61 | 12 | 16 | 57 | 70  | 55  |
| 222396 | conserved hypothetical protein-                                               | 70 | 3  | 4  | 81 | 46  | 36  |
| 244760 | putative predicted protein-                                                   | 70 | 3  | 4  | 81 | 46  | 36  |
| 805420 | conserved hypothetical protein-                                               | 50 | 23 | 32 | 36 | 91  | 72  |
| 55652  | conserved hypothetical protein-                                               | 36 | 37 | 51 | 17 | 110 | 87  |
| 99100  | type I secretion C-terminal target domain protein-                            | 36 | 37 | 51 | 17 | 110 | 87  |
| 381767 | conserved hypothetical protein-                                               | 60 | 13 | 18 | 55 | 72  | 57  |
| 705498 | conserved hypothetical protein-                                               | 60 | 13 | 18 | 55 | 72  | 57  |
| 807481 | F plasmid transfer operon family protein-                                     | 60 | 13 | 18 | 55 | 72  | 57  |
| 607395 | putative fic-                                                                 | 21 | 52 | 71 | 3  | 124 | 98  |
| 791781 | conserved hypothetical protein-                                               | 21 | 52 | 71 | 3  | 124 | 98  |
| 224897 | flagellar system-associated repeat family protein-                            | 30 | 43 | 59 | 10 | 117 | 92  |
| 156422 | carbapenem-associated resistance domain protein-                              | 46 | 27 | 37 | 30 | 97  | 76  |
| 16931  | conserved hypothetical protein-                                               | 63 | 10 | 14 | 62 | 65  | 51  |
| 435524 | putative membrane protein-                                                    | 63 | 10 | 14 | 62 | 65  | 51  |
| 104754 | conserved hypothetical protein-                                               | 58 | 15 | 21 | 51 | 76  | 60  |
| 365718 | conserved hypothetical protein-                                               | 58 | 15 | 21 | 51 | 76  | 60  |
| 52047  | type I secretion C-terminal target domain protein-                            | 58 | 15 | 21 | 51 | 76  | 60  |
| 49957  | D12 class N6 adenine-specific DNA methyltransferase family protein-           | 52 | 21 | 29 | 40 | 87  | 69  |
| 700522 | hypothetical protein-                                                         | 52 | 21 | 29 | 40 | 87  | 69  |
| 11474  | conserved hypothetical protein-                                               | 50 | 23 | 32 | 37 | 90  | 71  |
| 436790 | conserved hypothetical protein-                                               | 50 | 23 | 32 | 37 | 90  | 71  |
| 724671 | conserved hypothetical protein-                                               | 50 | 23 | 32 | 37 | 90  | 71  |
| 727346 | conserved hypothetical protein-                                               | 39 | 34 | 47 | 21 | 106 | 83  |
| 80580  | conserved hypothetical protein-                                               | 39 | 34 | 47 | 21 | 106 | 83  |
| 302701 | conserved hypothetical protein-                                               | 57 | 16 | 22 | 49 | 78  | 61  |
| 170749 | hypothetical protein-                                                         | 62 | 11 | 15 | 60 | 67  | 53  |
| 381731 | conserved hypothetical protein-                                               | 62 | 11 | 15 | 60 | 67  | 53  |
| 681555 | conserved hypothetical protein-                                               | 62 | 11 | 15 | 60 | 67  | 53  |
| 685804 | conserved hypothetical protein-                                               | 62 | 11 | 15 | 60 | 67  | 53  |
| 785603 | putative membrane protein-                                                    | 62 | 11 | 15 | 60 | 67  | 53  |
| 793883 | hypothetical protein-                                                         | 62 | 11 | 15 | 60 | 67  | 53  |
| 648674 | sodium symporter family protein-                                              | 46 | 27 | 37 | 31 | 96  | 76  |
| 724691 | conserved hypothetical protein-                                               | 15 | 58 | 79 | 0  | 127 | 100 |
| 301285 | conserved hypothetical protein-                                               | 61 | 12 | 16 | 58 | 69  | 54  |
| 63339  | hypothetical protein-                                                         | 61 | 12 | 16 | 58 | 69  | 54  |
| 807493 | conserved hypothetical protein-                                               | 61 | 12 | 16 | 58 | 69  | 54  |
| 807500 | conserved hypothetical protein-                                               | 61 | 12 | 16 | 58 | 69  | 54  |
| 664544 | kilA-N domain protein-                                                        | 66 | 7  | 10 | 70 | 57  | 45  |
| 336688 | sodium/hydrogen exchanger family protein-                                     | 34 | 39 | 53 | 15 | 112 | 88  |
| 676447 | flagellar system-associated repeat family protein-                            | 34 | 39 | 53 | 15 | 112 | 88  |
| 362770 | putative membrane protein-                                                    | 60 | 13 | 18 | 56 | 71  | 56  |
| 436519 | H-NS histone family protein-                                                  | 60 | 13 | 18 | 56 | 71  | 56  |
| 551079 | transposase C of IS166 homeodomain protein-                                   | 60 | 13 | 18 | 56 | 71  | 56  |
| 7366   | phage integrase family protein-                                               | 58 | 15 | 21 | 52 | 75  | 59  |
| 758969 | RHS repeat-associated core domain protein-                                    | 45 | 28 | 38 | 30 | 97  | 76  |
| 805407 | RHS repeat-associated core domain protein-                                    | 45 | 28 | 38 | 30 | 97  | 76  |
| 393653 | conserved hypothetical protein-                                               | 50 | 23 | 32 | 38 | 89  | 70  |
| 171651 | putative flavin-binding monooxygenase domain protein-                         | 67 | 6  | 8  | 74 | 53  | 42  |
| 131052 | conserved hypothetical protein-                                               | 20 | 53 | 73 | 3  | 124 | 98  |
| 145    | conserved hypothetical protein-                                               | 20 | 53 | 73 | 3  | 124 | 98  |
| 273780 | conserved hypothetical protein-                                               | 20 | 53 | 73 | 3  | 124 | 98  |
| 412167 | conserved hypothetical protein-                                               | 20 | 53 | 73 | 3  | 124 | 98  |
| 416304 | conserved hypothetical protein-                                               | 20 | 53 | 73 | 3  | 124 | 98  |
| 460631 | conserved hypothetical protein-                                               | 20 | 53 | 73 | 3  | 124 | 98  |
| 509468 | conserved hypothetical protein-                                               | 20 | 53 | 73 | 3  | 124 | 98  |
| 509469 | conserved hypothetical protein-                                               | 20 | 53 | 73 | 3  | 124 | 98  |
| 696657 | conserved hypothetical protein-                                               | 20 | 53 | 73 | 3  | 124 | 98  |
| 806153 | putative bacteriophage protein-                                               | 20 | 53 | 73 | 3  | 124 | 98  |
| 276326 | putative membrane protein-                                                    | 62 | 11 | 15 | 61 | 66  | 52  |
| 381753 | conserved hypothetical protein-                                               | 62 | 11 | 15 | 61 | 66  | 52  |
| 381774 | conserved hypothetical protein-                                               | 62 | 11 | 15 | 61 | 66  | 52  |
| 384713 | conserved hypothetical protein-                                               | 62 | 11 | 15 | 61 | 66  | 52  |

|        |                                                                   |    |    |    |    |     |     |
|--------|-------------------------------------------------------------------|----|----|----|----|-----|-----|
| 434782 | conjugative relaxase domain protein-                              | 62 | 11 | 15 | 61 | 66  | 52  |
| 804728 | putative aTP-binding protein-                                     | 53 | 20 | 27 | 43 | 84  | 66  |
| 538549 | conserved hypothetical protein-                                   | 71 | 2  | 3  | 86 | 41  | 32  |
| 170208 | DNA binding , excisionase family domain protein-                  | 51 | 22 | 30 | 40 | 87  | 69  |
| 229167 | endoribonuclease L-PSP family protein-                            | 42 | 31 | 42 | 26 | 101 | 80  |
| 804586 | conserved hypothetical protein-                                   | 70 | 3  | 4  | 83 | 44  | 35  |
| 364293 | conserved hypothetical protein-                                   | 52 | 21 | 29 | 42 | 85  | 67  |
| 601625 | conserved hypothetical protein-                                   | 52 | 21 | 29 | 42 | 85  | 67  |
| 804738 | exonuclease RNase T and DNA polymerase III domain protein-        | 52 | 21 | 29 | 42 | 85  | 67  |
| 234980 | helix-turn-helix family protein-                                  | 32 | 41 | 56 | 14 | 113 | 89  |
| 835    | conserved hypothetical protein-                                   | 32 | 41 | 56 | 14 | 113 | 89  |
| 197054 | conserved hypothetical protein-                                   | 61 | 12 | 16 | 59 | 68  | 54  |
| 766196 | type I secretion C-terminal target domain protein-                | 64 | 9  | 12 | 66 | 61  | 48  |
| 384722 | conserved hypothetical protein-                                   | 61 | 12 | 16 | 60 | 67  | 53  |
| 393139 | zeta toxin family protein-                                        | 61 | 12 | 16 | 60 | 67  | 53  |
| 432935 | putative transposase-                                             | 61 | 12 | 16 | 60 | 67  | 53  |
| 512809 | aromatic amino acid lyase family protein-                         | 48 | 25 | 34 | 35 | 92  | 72  |
| 689076 | RHS Repeat family protein-                                        | 43 | 30 | 41 | 28 | 99  | 78  |
| 161409 | putative aBC-type long-chain fatty acid transport system protein- | 29 | 44 | 60 | 11 | 116 | 91  |
| 724663 | conserved hypothetical protein-                                   | 31 | 42 | 58 | 13 | 114 | 90  |
| 727332 | conserved hypothetical protein-                                   | 31 | 42 | 58 | 13 | 114 | 90  |
| 732219 | conserved hypothetical protein-                                   | 31 | 42 | 58 | 13 | 114 | 90  |
| 792006 | conserved hypothetical protein-                                   | 31 | 42 | 58 | 13 | 114 | 90  |
| 466998 | NADP oxidoreductase coenzyme F420-dependent family protein-       | 18 | 55 | 75 | 2  | 125 | 98  |
| 501562 | conserved hypothetical protein-                                   | 18 | 55 | 75 | 2  | 125 | 98  |
| 317042 | conserved hypothetical protein-                                   | 40 | 33 | 45 | 24 | 103 | 81  |
| 322183 | conserved hypothetical protein-                                   | 40 | 33 | 45 | 24 | 103 | 81  |
| 383179 | conserved hypothetical protein-                                   | 40 | 33 | 45 | 24 | 103 | 81  |
| 427917 | tonB-dependent siderophore receptor family protein-               | 49 | 24 | 33 | 37 | 90  | 71  |
| 243848 | conserved hypothetical protein-                                   | 38 | 35 | 48 | 21 | 106 | 83  |
| 452913 | putative glutamate 5-kinase-                                      | 14 | 59 | 81 | 0  | 127 | 100 |
| 655293 | putative glutamate 5-kinase-                                      | 14 | 59 | 81 | 0  | 127 | 100 |
| 333860 | putative membrane protein-                                        | 41 | 32 | 44 | 25 | 102 | 80  |
| 352883 | bacterial SH3 domain protein-                                     | 41 | 32 | 44 | 25 | 102 | 80  |
| 227376 | putative pilus assembly protein FIF-                              | 50 | 23 | 32 | 39 | 88  | 69  |
| 171653 | putative transposase domain protein-                              | 68 | 5  | 7  | 78 | 49  | 39  |
| 327500 | conserved hypothetical protein-                                   | 57 | 16 | 22 | 52 | 75  | 59  |
| 532471 | POTRA domain, ShlB-type family protein-                           | 55 | 18 | 25 | 48 | 79  | 62  |
| 701049 | putative transposase-                                             | 54 | 19 | 26 | 46 | 81  | 64  |
| 716783 | putative transposase-                                             | 54 | 19 | 26 | 46 | 81  | 64  |
| 774414 | putative transposase-                                             | 54 | 19 | 26 | 46 | 81  | 64  |
| 643027 | conserved hypothetical protein-                                   | 52 | 21 | 29 | 43 | 84  | 66  |
| 807215 | SEC-C motif domain protein-                                       | 52 | 21 | 29 | 43 | 84  | 66  |
| 342195 | putative tail fiber-                                              | 50 | 23 | 32 | 40 | 87  | 69  |
| 522763 | conserved hypothetical protein-                                   | 50 | 23 | 32 | 40 | 87  | 69  |
| 187219 | bacterial regulatory , Fis family protein-                        | 46 | 27 | 37 | 33 | 94  | 74  |
| 197791 | conserved hypothetical protein-                                   | 54 | 19 | 26 | 47 | 80  | 63  |
| 28391  | integron integrase family protein-                                | 54 | 19 | 26 | 47 | 80  | 63  |
| 569430 | class 1 integrase domain protein-                                 | 54 | 19 | 26 | 47 | 80  | 63  |
| 184498 | 3-beta hydroxysteroid dehydrogenase/isomerase family protein-     | 66 | 7  | 10 | 73 | 54  | 43  |
| 529248 | rmID substrate binding domain protein-                            | 66 | 7  | 10 | 73 | 54  | 43  |
| 55120  | UDP-N-acetylglucosamine 2-epimerase-                              | 66 | 7  | 10 | 73 | 54  | 43  |
| 604474 | 3-beta hydroxysteroid dehydrogenase/isomerase family protein-     | 66 | 7  | 10 | 73 | 54  | 43  |
| 651024 | rmID substrate binding domain protein-                            | 66 | 7  | 10 | 73 | 54  | 43  |
| 707637 | 3-beta hydroxysteroid dehydrogenase/isomerase family protein-     | 66 | 7  | 10 | 73 | 54  | 43  |
| 719215 | 3-beta hydroxysteroid dehydrogenase/isomerase family protein-     | 66 | 7  | 10 | 73 | 54  | 43  |
| 109546 | conserved hypothetical protein-                                   | 61 | 12 | 16 | 61 | 66  | 52  |
| 352832 | conserved hypothetical protein-                                   | 61 | 12 | 16 | 61 | 66  | 52  |
| 365985 | conserved hypothetical protein-                                   | 61 | 12 | 16 | 61 | 66  | 52  |
| 138000 | conserved hypothetical protein-                                   | 19 | 54 | 74 | 3  | 124 | 98  |
| 396612 | conserved hypothetical protein-                                   | 19 | 54 | 74 | 3  | 124 | 98  |
| 629764 | conserved hypothetical protein-                                   | 19 | 54 | 74 | 3  | 124 | 98  |
| 116951 | AMP-binding enzyme family protein-                                | 47 | 26 | 36 | 35 | 92  | 72  |
| 167532 | acyltransferase family protein-                                   | 47 | 26 | 36 | 35 | 92  | 72  |
| 229134 | conserved hypothetical protein-                                   | 47 | 26 | 36 | 35 | 92  | 72  |
| 427106 | beta-ketoacyl synthase, N-terminal domain protein-                | 47 | 26 | 36 | 35 | 92  | 72  |
| 668726 | putative phosphoribosylglycinamide formyltransferase-             | 47 | 26 | 36 | 35 | 92  | 72  |
| 708223 | FAD binding domain protein-                                       | 47 | 26 | 36 | 35 | 92  | 72  |
| 734108 | phosphopantetheine attachment site family protein-                | 47 | 26 | 36 | 35 | 92  | 72  |
| 74392  | KR domain protein-                                                | 47 | 26 | 36 | 35 | 92  | 72  |
| 807736 | phosphopantetheine attachment site family protein-                | 47 | 26 | 36 | 35 | 92  | 72  |
| 807740 | bacterial lipid A biosynthesis acyltransferase family protein-    | 47 | 26 | 36 | 35 | 92  | 72  |
| 807742 | thioesterase-like superfamily protein-                            | 47 | 26 | 36 | 35 | 92  | 72  |
| 807743 | outer membrane lipocarrier LolA family protein-                   | 47 | 26 | 36 | 35 | 92  | 72  |
| 807748 | fabA-like domain protein-                                         | 47 | 26 | 36 | 35 | 92  | 72  |
| 807750 | beta-ketoacyl synthase, N-terminal domain protein-                | 47 | 26 | 36 | 35 | 92  | 72  |
| 364626 | conserved hypothetical protein-                                   | 30 | 43 | 59 | 13 | 114 | 90  |
| 771818 | conserved hypothetical protein-                                   | 30 | 43 | 59 | 13 | 114 | 90  |
| 789688 | conserved hypothetical protein-                                   | 30 | 43 | 59 | 13 | 114 | 90  |
| 225297 | rhs element Vgr family protein-                                   | 28 | 45 | 62 | 11 | 116 | 91  |
| 80579  | conserved hypothetical protein-                                   | 48 | 25 | 34 | 37 | 90  | 71  |
| 453982 | SH3 domain protein-                                               | 40 | 33 | 45 | 25 | 102 | 80  |
| 231251 | glycosyl transferase 2 family protein-                            | 47 | 26 | 36 | 36 | 91  | 72  |
| 458978 | putative membrane protein-                                        | 47 | 26 | 36 | 36 | 91  | 72  |
| 512815 | beta-ketoacyl synthase, N-terminal domain protein-                | 47 | 26 | 36 | 36 | 91  | 72  |
| 576036 | intracellular septation A family protein-                         | 47 | 26 | 36 | 36 | 91  | 72  |
| 160113 | conserved hypothetical protein-                                   | 17 | 56 | 77 | 2  | 125 | 98  |
| 278206 | conserved hypothetical protein-                                   | 17 | 56 | 77 | 2  | 125 | 98  |
| 366881 | peptidase_C39 like family protein-                                | 17 | 56 | 77 | 2  | 125 | 98  |
| 561452 | conserved hypothetical protein-                                   | 17 | 56 | 77 | 2  | 125 | 98  |
| 561500 | sugar (and other) transporter family protein-                     | 17 | 56 | 77 | 2  | 125 | 98  |
| 656964 | metA-pathway of phenol degradation family protein-                | 17 | 56 | 77 | 2  | 125 | 98  |
| 724660 | conserved hypothetical protein-                                   | 17 | 56 | 77 | 2  | 125 | 98  |
| 222387 | single-strand binding family protein-                             | 69 | 4  | 5  | 82 | 45  | 35  |
| 49963  | conserved hypothetical protein-                                   | 69 | 4  | 5  | 82 | 45  | 35  |

|        |                                                                                   |    |    |    |    |     |     |
|--------|-----------------------------------------------------------------------------------|----|----|----|----|-----|-----|
| 196328 | conserved hypothetical protein-                                                   | 51 | 22 | 30 | 42 | 85  | 67  |
| 22324  | ribD C-terminal domain protein-                                                   | 50 | 23 | 32 | 41 | 86  | 68  |
| 604279 | ribD C-terminal domain protein-                                                   | 50 | 23 | 32 | 41 | 86  | 68  |
| 724570 | tape measure domain protein-                                                      | 50 | 23 | 32 | 41 | 86  | 68  |
| 354315 | conserved hypothetical protein-                                                   | 53 | 20 | 27 | 46 | 81  | 64  |
| 70386  | conserved hypothetical protein-                                                   | 61 | 12 | 16 | 62 | 65  | 51  |
| 202366 | conserved hypothetical protein-                                                   | 13 | 60 | 82 | 0  | 127 | 100 |
| 803176 | putative glutamate 5-kinase-                                                      | 13 | 60 | 82 | 0  | 127 | 100 |
| 87182  | hxlR-like helix-turn-helix family protein-                                        | 13 | 60 | 82 | 0  | 127 | 100 |
| 705861 | putative membrane protein-                                                        | 41 | 32 | 44 | 27 | 100 | 79  |
| 684755 | CSLREA domain protein-                                                            | 15 | 58 | 79 | 1  | 126 | 99  |
| 444118 | integron integrase domain protein-                                                | 63 | 10 | 14 | 67 | 60  | 47  |
| 500547 | flagellar system-associated repeat family protein-                                | 60 | 13 | 18 | 61 | 66  | 52  |
| 150960 | tyrosine-protein kinase ptk-                                                      | 18 | 55 | 75 | 3  | 124 | 98  |
| 22995  | tyrosine-protein kinase ptk-                                                      | 18 | 55 | 75 | 3  | 124 | 98  |
| 42202  | tyrosine-protein kinase ptk-                                                      | 18 | 55 | 75 | 3  | 124 | 98  |
| 440288 | tyrosine-protein kinase ptk-                                                      | 18 | 55 | 75 | 3  | 124 | 98  |
| 510359 | tyrosine-protein kinase ptk-                                                      | 18 | 55 | 75 | 3  | 124 | 98  |
| 514016 | conserved hypothetical protein-                                                   | 18 | 55 | 75 | 3  | 124 | 98  |
| 518066 | tyrosine-protein kinase ptk-                                                      | 18 | 55 | 75 | 3  | 124 | 98  |
| 546407 | tyrosine-protein kinase ptk-                                                      | 18 | 55 | 75 | 3  | 124 | 98  |
| 627352 | conserved hypothetical protein-                                                   | 18 | 55 | 75 | 3  | 124 | 98  |
| 6823   | phospholipase C, phosphocholine-specific-                                         | 18 | 55 | 75 | 3  | 124 | 98  |
| 719200 | tyrosine-protein kinase ptk-                                                      | 18 | 55 | 75 | 3  | 124 | 98  |
| 380213 | CSLREA domain protein-                                                            | 48 | 25 | 34 | 38 | 89  | 70  |
| 51908  | sugar (and other) transporter family protein-                                     | 47 | 26 | 36 | 37 | 90  | 71  |
| 581876 | conserved hypothetical protein-                                                   | 47 | 26 | 36 | 37 | 90  | 71  |
| 671565 | conserved hypothetical protein-                                                   | 47 | 26 | 36 | 37 | 90  | 71  |
| 675693 | L-alanine-DL-glutamate epimerase and related enzymes of enolase superfamily-      | 47 | 26 | 36 | 37 | 90  | 71  |
| 56013  | type VI secretion system effector, Hcp1 family protein-                           | 29 | 44 | 60 | 13 | 114 | 90  |
| 572946 | conserved hypothetical protein-                                                   | 29 | 44 | 60 | 13 | 114 | 90  |
| 807168 | conserved hypothetical protein-                                                   | 23 | 50 | 68 | 7  | 120 | 94  |
| 60319  | putative nTP-binding protein-                                                     | 66 | 7  | 10 | 75 | 52  | 41  |
| 123658 | putative stress-responsive nuclear envelope domain protein-                       | 54 | 19 | 26 | 49 | 78  | 61  |
| 805196 | conserved hypothetical protein-                                                   | 53 | 20 | 27 | 47 | 80  | 63  |
| 807883 | bacterial SH3 domain protein-                                                     | 49 | 24 | 33 | 41 | 86  | 68  |
| 600181 | RHS Repeat family protein-                                                        | 40 | 33 | 45 | 27 | 100 | 79  |
| 196024 | conserved hypothetical protein-                                                   | 53 | 20 | 27 | 48 | 79  | 62  |
| 503236 | conserved hypothetical protein-                                                   | 53 | 20 | 27 | 48 | 79  | 62  |
| 805166 | dehydratase family protein-                                                       | 16 | 57 | 78 | 2  | 125 | 98  |
| 129091 | amidohydrolase family protein-                                                    | 32 | 41 | 56 | 17 | 110 | 87  |
| 254490 | conserved hypothetical protein-                                                   | 65 | 8  | 11 | 74 | 53  | 42  |
| 428030 | phage head morphogenesis , SPP1 gp7 family domain protein-                        | 12 | 61 | 84 | 0  | 127 | 100 |
| 503330 | ketopantoate reductase PanE/ApA family protein-                                   | 12 | 61 | 84 | 0  | 127 | 100 |
| 528055 | conserved hypothetical protein-                                                   | 12 | 61 | 84 | 0  | 127 | 100 |
| 565124 | ketopantoate reductase PanE/ApA family protein-                                   | 12 | 61 | 84 | 0  | 127 | 100 |
| 720081 | putative glutamate 5-kinase-                                                      | 12 | 61 | 84 | 0  | 127 | 100 |
| 144114 | tetratricopeptide repeat family protein-                                          | 33 | 40 | 55 | 18 | 109 | 86  |
| 40734  | conserved hypothetical protein-                                                   | 33 | 40 | 55 | 18 | 109 | 86  |
| 606234 | tetratricopeptide repeat family protein-                                          | 33 | 40 | 55 | 18 | 109 | 86  |
| 805212 | phage antirepressor KiAC domain protein-                                          | 47 | 26 | 36 | 38 | 89  | 70  |
| 278228 | conserved hypothetical protein-                                                   | 14 | 59 | 81 | 1  | 126 | 99  |
| 636532 | sugar (and other) transporter family protein-                                     | 14 | 59 | 81 | 1  | 126 | 99  |
| 712522 | conserved hypothetical protein-                                                   | 35 | 38 | 52 | 21 | 106 | 83  |
| 18899  | prevent-host-death family protein-                                                | 46 | 27 | 37 | 37 | 90  | 71  |
| 281760 | multidrug resistance efflux transporter family protein-                           | 46 | 27 | 37 | 37 | 90  | 71  |
| 285282 | acetyltransferase family protein-                                                 | 66 | 7  | 10 | 77 | 50  | 39  |
| 11449  | AMP-binding enzyme family protein-                                                | 17 | 56 | 77 | 3  | 124 | 98  |
| 256318 | conserved hypothetical protein-                                                   | 52 | 21 | 29 | 47 | 80  | 63  |
| 256372 | phage integrase family protein-                                                   | 52 | 21 | 29 | 47 | 80  | 63  |
| 323736 | conserved hypothetical protein-                                                   | 52 | 21 | 29 | 47 | 80  | 63  |
| 36251  | phage integrase family protein-                                                   | 52 | 21 | 29 | 47 | 80  | 63  |
| 382490 | conserved hypothetical protein-                                                   | 52 | 21 | 29 | 47 | 80  | 63  |
| 188298 | gene 25-like lysozyme family protein-                                             | 29 | 44 | 60 | 14 | 113 | 89  |
| 532080 | conserved hypothetical protein-                                                   | 55 | 18 | 25 | 53 | 74  | 58  |
| 724672 | conserved hypothetical protein-                                                   | 53 | 20 | 27 | 49 | 78  | 61  |
| 37700  | conserved hypothetical protein-                                                   | 54 | 19 | 26 | 51 | 76  | 60  |
| 266529 | flagellar system-associated repeat family protein-                                | 33 | 40 | 55 | 19 | 108 | 85  |
| 531549 | conserved hypothetical protein-                                                   | 60 | 13 | 18 | 63 | 64  | 50  |
| 282882 | conserved hypothetical protein-                                                   | 63 | 10 | 14 | 70 | 57  | 45  |
| 705974 | fimbrial protein-                                                                 | 63 | 10 | 14 | 70 | 57  | 45  |
| 454939 | lysR substrate binding domain protein-                                            | 45 | 28 | 38 | 36 | 91  | 72  |
| 637309 | lysR substrate binding domain protein-                                            | 45 | 28 | 38 | 36 | 91  | 72  |
| 579297 | conserved hypothetical protein-                                                   | 59 | 14 | 19 | 62 | 65  | 51  |
| 159272 | putative lipoprotein-                                                             | 47 | 26 | 36 | 39 | 88  | 69  |
| 692214 | mbane-bound PQQ-dependent dehydrogenase, glucose/quininate/shikimate family prote | 47 | 26 | 36 | 39 | 88  | 69  |
| 168890 | acetyltransferase domain protein-                                                 | 15 | 58 | 79 | 2  | 125 | 98  |
| 4399   | putative glutamine amidotransferase-                                              | 15 | 58 | 79 | 2  | 125 | 98  |
| 496289 | CSLREA domain protein-                                                            | 15 | 58 | 79 | 2  | 125 | 98  |
| 671084 | CSLREA domain protein-                                                            | 15 | 58 | 79 | 2  | 125 | 98  |
| 170895 | tonB dependent receptor family protein-                                           | 46 | 27 | 37 | 38 | 89  | 70  |
| 182554 | eamA-like transporter family protein-                                             | 46 | 27 | 37 | 38 | 89  | 70  |
| 189995 | putative signal peptide-containing protein-                                       | 46 | 27 | 37 | 38 | 89  | 70  |
| 357854 | bacterial SH3 domain protein-                                                     | 48 | 25 | 34 | 41 | 86  | 68  |
| 193555 | type I secretion C-terminal target domain protein-                                | 47 | 26 | 36 | 40 | 87  | 69  |
| 50993  | outer membrane beta-barrel domain protein-                                        | 42 | 31 | 42 | 32 | 95  | 75  |
| 486249 | conserved hypothetical protein-                                                   | 54 | 19 | 26 | 52 | 75  | 59  |
| 807862 | ankyrin repeats family protein-                                                   | 52 | 21 | 29 | 48 | 79  | 62  |
| 754233 | conserved hypothetical protein-                                                   | 67 | 6  | 8  | 81 | 46  | 36  |
| 705200 | putative lipoprotein-                                                             | 60 | 13 | 18 | 64 | 63  | 50  |
| 167249 | phage head morphogenesis , SPP1 gp7 family domain protein-                        | 11 | 62 | 85 | 0  | 127 | 100 |
| 256348 | putative glutamate 5-kinase-                                                      | 11 | 62 | 85 | 0  | 127 | 100 |
| 263166 | putative glutamate 5-kinase-                                                      | 11 | 62 | 85 | 0  | 127 | 100 |
| 302784 | PAAR motif family protein-                                                        | 11 | 62 | 85 | 0  | 127 | 100 |
| 55726  | conserved hypothetical protein-                                                   | 11 | 62 | 85 | 0  | 127 | 100 |

|        |                                                                    |    |    |    |    |     |     |
|--------|--------------------------------------------------------------------|----|----|----|----|-----|-----|
| 696673 | conserved hypothetical protein-                                    | 11 | 62 | 85 | 0  | 127 | 100 |
| 724687 | putative glutamate 5-kinase-                                       | 11 | 62 | 85 | 0  | 127 | 100 |
| 791477 | putative glutamate 5-kinase-                                       | 11 | 62 | 85 | 0  | 127 | 100 |
| 791714 | 4'-phosphopantetheinyl transferase superfamily protein-            | 11 | 62 | 85 | 0  | 127 | 100 |
| 449706 | flagellar system-associated repeat family protein-                 | 52 | 21 | 29 | 49 | 78  | 61  |
| 682126 | reverse transcriptase family protein-                              | 52 | 21 | 29 | 49 | 78  | 61  |
| 560504 | AAA domain protein-                                                | 28 | 45 | 62 | 14 | 113 | 89  |
| 610608 | rhs element Vgr family protein-                                    | 28 | 45 | 62 | 14 | 113 | 89  |
| 563024 | magnesium-translocating P-type ATPase-                             | 13 | 60 | 82 | 1  | 126 | 99  |
| 59600  | aminoglycoside-(3)-N-acetyltransferase-                            | 65 | 8  | 11 | 76 | 51  | 40  |
| 273775 | conserved hypothetical protein-                                    | 67 | 6  | 8  | 82 | 45  | 35  |
| 435958 | flagellar system-associated repeat family protein-                 | 44 | 29 | 40 | 35 | 92  | 72  |
| 19439  | enoyl-(Acyl carrier ) reductase family protein-                    | 68 | 5  | 7  | 84 | 43  | 34  |
| 785001 | conserved hypothetical protein-                                    | 20 | 53 | 73 | 6  | 121 | 95  |
| 184494 | enoyl-(Acyl carrier ) reductase family protein-                    | 68 | 5  | 7  | 85 | 42  | 33  |
| 521990 | zinc-binding dehydrogenase family protein-                         | 45 | 28 | 38 | 37 | 90  | 71  |
| 569088 | ring hydroxylating alpha subunit family protein-                   | 45 | 28 | 38 | 37 | 90  | 71  |
| 710653 | ethanolamine utilization EutQ family protein-                      | 45 | 28 | 38 | 37 | 90  | 71  |
| 741974 | FAD dependent oxidoreductase family protein-                       | 45 | 28 | 38 | 37 | 90  | 71  |
| 804842 | aldehyde dehydrogenase family protein-                             | 45 | 28 | 38 | 37 | 90  | 71  |
| 505561 | bacterial regulatory, tetR family protein-                         | 23 | 50 | 68 | 9  | 118 | 93  |
| 618420 | conserved hypothetical protein-                                    | 23 | 50 | 68 | 9  | 118 | 93  |
| 170113 | antibiotic biosynthesis monooxygenase family protein-              | 27 | 46 | 63 | 13 | 114 | 90  |
| 120780 | bacterial regulatory, tetR family protein-                         | 25 | 48 | 66 | 11 | 116 | 91  |
| 758275 | transposase IS66 family protein-                                   | 31 | 42 | 58 | 18 | 109 | 86  |
| 375222 | pyridine nucleotide-disulfide oxidoreductase family protein-       | 45 | 28 | 38 | 38 | 89  | 70  |
| 403886 | outer membrane transport family protein-                           | 17 | 56 | 77 | 4  | 123 | 97  |
| 607396 | outer membrane insertion C-terminal signal domain protein-         | 17 | 56 | 77 | 4  | 123 | 97  |
| 687965 | outer membrane insertion C-terminal signal domain protein-         | 17 | 56 | 77 | 4  | 123 | 97  |
| 779772 | outer membrane transport family protein-                           | 17 | 56 | 77 | 4  | 123 | 97  |
| 242373 | conserved hypothetical protein-                                    | 61 | 12 | 16 | 68 | 59  | 46  |
| 623507 | putative membrane protein-                                         | 61 | 12 | 16 | 68 | 59  | 46  |
| 653730 | conserved hypothetical protein-                                    | 61 | 12 | 16 | 68 | 59  | 46  |
| 764640 | conserved hypothetical protein-                                    | 61 | 12 | 16 | 68 | 59  | 46  |
| 804531 | conserved hypothetical protein-                                    | 61 | 12 | 16 | 68 | 59  | 46  |
| 1900   | UDP-N-acetyl-D-glucosamine 2-epimerase, UDP-hydrolysing-           | 67 | 6  | 8  | 83 | 44  | 35  |
| 197239 | UDP-N-acetyl-D-glucosamine 2-epimerase, UDP-hydrolysing-           | 67 | 6  | 8  | 83 | 44  | 35  |
| 368640 | bacterial transferase hexapeptide family protein-                  | 67 | 6  | 8  | 83 | 44  | 35  |
| 440298 | bacterial transferase hexapeptide family protein-                  | 67 | 6  | 8  | 83 | 44  | 35  |
| 74435  | UDP-N-acetylglucosamine 4,6-dehydratase-                           | 67 | 6  | 8  | 83 | 44  | 35  |
| 763006 | nucleotidyl transferase family protein-                            | 67 | 6  | 8  | 83 | 44  | 35  |
| 580406 | bacterial regulatory, tetR family protein-                         | 14 | 59 | 81 | 2  | 125 | 98  |
| 601654 | redox-sensitive transcriptional activator SoxR-                    | 14 | 59 | 81 | 2  | 125 | 98  |
| 668779 | major Facilitator Superfamily protein-                             | 14 | 59 | 81 | 2  | 125 | 98  |
| 95809  | major Facilitator Superfamily protein-                             | 14 | 59 | 81 | 2  | 125 | 98  |
| 296092 | conserved hypothetical protein-                                    | 50 | 23 | 32 | 47 | 80  | 63  |
| 458411 | CSLREA domain protein-                                             | 50 | 23 | 32 | 47 | 80  | 63  |
| 513992 | conserved hypothetical protein-                                    | 50 | 23 | 32 | 47 | 80  | 63  |
| 308915 | conserved hypothetical protein-                                    | 59 | 14 | 19 | 64 | 63  | 50  |
| 415852 | conserved hypothetical protein-                                    | 43 | 30 | 41 | 35 | 92  | 72  |
| 666158 | conserved hypothetical protein-                                    | 71 | 2  | 3  | 95 | 32  | 25  |
| 226685 | putative major capsid protein-                                     | 27 | 46 | 63 | 14 | 113 | 89  |
| 91978  | type I secretion C-terminal target domain protein-                 | 62 | 11 | 15 | 71 | 56  | 44  |
| 698049 | putative filC-                                                     | 44 | 29 | 40 | 37 | 90  | 71  |
| 289865 | conserved hypothetical protein-                                    | 43 | 30 | 41 | 36 | 91  | 72  |
| 55298  | phage minor tail family protein-                                   | 61 | 12 | 16 | 69 | 58  | 46  |
| 55300  | nlpC/P60 family protein-                                           | 61 | 12 | 16 | 69 | 58  | 46  |
| 591096 | putative phage tail protein-                                       | 61 | 12 | 16 | 69 | 58  | 46  |
| 135319 | bacterial regulatory, tetR family protein-                         | 45 | 28 | 38 | 39 | 88  | 69  |
| 397481 | conserved hypothetical protein-                                    | 45 | 28 | 38 | 39 | 88  | 69  |
| 509482 | conserved hypothetical protein-                                    | 45 | 28 | 38 | 39 | 88  | 69  |
| 650274 | aspartate 4-decarboxylase-                                         | 45 | 28 | 38 | 39 | 88  | 69  |
| 229890 | conserved hypothetical protein-                                    | 12 | 61 | 84 | 1  | 126 | 99  |
| 256340 | phage head morphogenesis , SPP1 gp7 family domain protein-         | 12 | 61 | 84 | 1  | 126 | 99  |
| 382021 | amino acid permease family protein-                                | 12 | 61 | 84 | 1  | 126 | 99  |
| 413213 | phage head morphogenesis , SPP1 gp7 family domain protein-         | 12 | 61 | 84 | 1  | 126 | 99  |
| 509493 | phage head morphogenesis , SPP1 gp7 family domain protein-         | 12 | 61 | 84 | 1  | 126 | 99  |
| 53585  | aldehyde dehydrogenase family protein-                             | 12 | 61 | 84 | 1  | 126 | 99  |
| 589808 | conserved hypothetical protein-                                    | 12 | 61 | 84 | 1  | 126 | 99  |
| 611338 | sensory box protein-                                               | 12 | 61 | 84 | 1  | 126 | 99  |
| 644857 | phage head morphogenesis , SPP1 gp7 family domain protein-         | 12 | 61 | 84 | 1  | 126 | 99  |
| 730122 | phage head morphogenesis , SPP1 gp7 family domain protein-         | 12 | 61 | 84 | 1  | 126 | 99  |
| 730135 | conserved hypothetical protein-                                    | 12 | 61 | 84 | 1  | 126 | 99  |
| 790901 | hypothetical protein-                                              | 61 | 12 | 16 | 69 | 58  | 46  |
| 413199 | conserved hypothetical protein-                                    | 39 | 34 | 47 | 30 | 97  | 76  |
| 695996 | conserved hypothetical protein-                                    | 39 | 34 | 47 | 30 | 97  | 76  |
| 126777 | conserved hypothetical protein-                                    | 10 | 63 | 86 | 0  | 127 | 100 |
| 144362 | conserved hypothetical protein-                                    | 10 | 63 | 86 | 0  | 127 | 100 |
| 166997 | putative Peptidoglycan domain protein-                             | 10 | 63 | 86 | 0  | 127 | 100 |
| 21326  | putative glutamate 5-kinase-                                       | 10 | 63 | 86 | 0  | 127 | 100 |
| 257909 | conserved hypothetical protein-                                    | 10 | 63 | 86 | 0  | 127 | 100 |
| 392576 | putative glutamate 5-kinase-                                       | 10 | 63 | 86 | 0  | 127 | 100 |
| 469012 | putative glutamate 5-kinase-                                       | 10 | 63 | 86 | 0  | 127 | 100 |
| 536544 | putative glutamate 5-kinase-                                       | 10 | 63 | 86 | 0  | 127 | 100 |
| 730136 | conserved hypothetical protein-                                    | 10 | 63 | 86 | 0  | 127 | 100 |
| 292579 | conserved hypothetical protein-                                    | 26 | 47 | 64 | 13 | 114 | 90  |
| 664502 | conserved hypothetical protein-                                    | 26 | 47 | 64 | 13 | 114 | 90  |
| 273150 | polyketide cyclase / dehydrase and lipid transport family protein- | 15 | 58 | 79 | 3  | 124 | 98  |
| 354576 | phosphopantetheine attachment site family protein-                 | 15 | 58 | 79 | 3  | 124 | 98  |
| 662894 | acyl-CoA dehydrogenase, C-terminal domain protein-                 | 15 | 58 | 79 | 3  | 124 | 98  |
| 682159 | conserved hypothetical protein-                                    | 15 | 58 | 79 | 3  | 124 | 98  |
| 88865  | conserved hypothetical protein-                                    | 15 | 58 | 79 | 3  | 124 | 98  |
| 117124 | secretory lipase family protein-                                   | 24 | 49 | 67 | 11 | 116 | 91  |
| 149967 | secretory lipase family protein-                                   | 24 | 49 | 67 | 11 | 116 | 91  |
| 541836 | carboxymuconolactone decarboxylase family protein-                 | 24 | 49 | 67 | 11 | 116 | 91  |



|        |                                                               |    |    |    |     |     |    |
|--------|---------------------------------------------------------------|----|----|----|-----|-----|----|
| 184486 | UDP-N-acetylglucosamine 4,6-dehydratase-                      | 67 | 6  | 8  | 84  | 43  | 34 |
| 184491 | nucleotidyl transferase family protein-                       | 67 | 6  | 8  | 84  | 43  | 34 |
| 1899   | beta-eliminating lyase family protein-                        | 67 | 6  | 8  | 84  | 43  | 34 |
| 193408 | tape measure domain protein-                                  | 67 | 6  | 8  | 84  | 43  | 34 |
| 269871 | hypothetical protein-                                         | 67 | 6  | 8  | 84  | 43  | 34 |
| 326829 | SAF domain protein-                                           | 67 | 6  | 8  | 84  | 43  | 34 |
| 440299 | nucleotidyl transferase family protein-                       | 67 | 6  | 8  | 84  | 43  | 34 |
| 464545 | putative membrane protein-                                    | 67 | 6  | 8  | 84  | 43  | 34 |
| 806683 | beta-eliminating lyase family protein-                        | 67 | 6  | 8  | 84  | 43  | 34 |
| 55715  | conserved hypothetical protein-                               | 46 | 27 | 37 | 41  | 86  | 68 |
| 101037 | type I secretion C-terminal target domain protein-            | 37 | 36 | 49 | 27  | 100 | 79 |
| 247444 | lysR substrate binding domain protein-                        | 34 | 39 | 53 | 23  | 104 | 82 |
| 777277 | phenazine biosynthesis , PhzF family protein-                 | 34 | 39 | 53 | 23  | 104 | 82 |
| 680346 | outer membrane transport family protein-                      | 59 | 14 | 19 | 65  | 62  | 49 |
| 447955 | catalase-related immune-responsive family protein-            | 51 | 22 | 30 | 50  | 77  | 61 |
| 131684 | conserved hypothetical protein-                               | 16 | 57 | 78 | 4   | 123 | 97 |
| 694341 | conserved hypothetical protein-                               | 16 | 57 | 78 | 4   | 123 | 97 |
| 116049 | bacterial extracellular solute-binding family protein-        | 42 | 31 | 42 | 35  | 92  | 72 |
| 272288 | acetamidase/Formamidase family protein-                       | 42 | 31 | 42 | 35  | 92  | 72 |
| 288843 | conserved hypothetical protein-                               | 69 | 4  | 5  | 90  | 37  | 29 |
| 163221 | alpha/beta hydrolase family domain protein-                   | 23 | 50 | 68 | 10  | 117 | 92 |
| 357251 | tonB dependent receptor family protein-                       | 29 | 44 | 60 | 17  | 110 | 87 |
| 108551 | 3-beta hydroxysteroid dehydrogenase/isomerase family protein- | 70 | 3  | 4  | 94  | 33  | 26 |
| 32433  | putative lipoprotein-                                         | 70 | 3  | 4  | 94  | 33  | 26 |
| 497845 | 3-beta hydroxysteroid dehydrogenase/isomerase family protein- | 70 | 3  | 4  | 94  | 33  | 26 |
| 304810 | prepilin-type N-terminal cleavage/methylation domain protein- | 69 | 4  | 5  | 91  | 36  | 28 |
| 405673 | prepilin-type N-terminal cleavage/methylation domain protein- | 69 | 4  | 5  | 91  | 36  | 28 |
| 798428 | phage minor tail protein L-                                   | 61 | 12 | 16 | 70  | 57  | 45 |
| 179140 | HAMP domain protein-                                          | 13 | 60 | 82 | 2   | 125 | 98 |
| 222725 | conserved hypothetical protein-                               | 13 | 60 | 82 | 2   | 125 | 98 |
| 434048 | conserved hypothetical protein-                               | 13 | 60 | 82 | 2   | 125 | 98 |
| 54736  | bacterial regulatory, tetR family protein-                    | 13 | 60 | 82 | 2   | 125 | 98 |
| 805167 | fumarylacetoacetate (FAA) hydrolase family protein-           | 13 | 60 | 82 | 2   | 125 | 98 |
| 222278 | tonB dependent receptor family protein-                       | 27 | 46 | 63 | 15  | 112 | 88 |
| 365901 | type IV pilin structural subunit-                             | 73 | 0  | 0  | 106 | 21  | 17 |
| 701535 | aspartate-alanine antiporter-                                 | 45 | 28 | 38 | 40  | 87  | 69 |
| 806790 | integron integrase family protein-                            | 56 | 17 | 23 | 60  | 67  | 53 |
| 274019 | zonular occludens toxin family protein-                       | 67 | 6  | 8  | 85  | 42  | 33 |
| 806793 | nucleotidyltransferase domain protein-                        | 67 | 6  | 8  | 85  | 42  | 33 |
| 129040 | SPFH domain / Band 7 family protein-                          | 60 | 13 | 18 | 68  | 59  | 46 |
| 152184 | initiator Replication family protein-                         | 60 | 13 | 18 | 68  | 59  | 46 |
| 160324 | conserved hypothetical protein-                               | 60 | 13 | 18 | 68  | 59  | 46 |
| 160333 | conserved hypothetical protein-                               | 60 | 13 | 18 | 68  | 59  | 46 |
| 16812  | conserved hypothetical protein-                               | 60 | 13 | 18 | 68  | 59  | 46 |
| 16816  | putative shikimate kinase-                                    | 60 | 13 | 18 | 68  | 59  | 46 |
| 224280 | conserved hypothetical protein-                               | 60 | 13 | 18 | 68  | 59  | 46 |
| 224331 | hypothetical protein-                                         | 60 | 13 | 18 | 68  | 59  | 46 |
| 232816 | intein C-terminal splicing region domain protein-             | 60 | 13 | 18 | 68  | 59  | 46 |
| 232819 | conserved hypothetical protein-                               | 60 | 13 | 18 | 68  | 59  | 46 |
| 242295 | conserved hypothetical protein-                               | 60 | 13 | 18 | 68  | 59  | 46 |
| 242323 | death-on-curing family protein-                               | 60 | 13 | 18 | 68  | 59  | 46 |
| 247754 | conserved hypothetical protein-                               | 60 | 13 | 18 | 68  | 59  | 46 |
| 294629 | calcineurin-like phosphoesterase superfamily domain protein-  | 60 | 13 | 18 | 68  | 59  | 46 |
| 294642 | conserved hypothetical protein-                               | 60 | 13 | 18 | 68  | 59  | 46 |
| 324667 | conserved hypothetical protein-                               | 60 | 13 | 18 | 68  | 59  | 46 |
| 324732 | conserved hypothetical protein-                               | 60 | 13 | 18 | 68  | 59  | 46 |
| 36885  | conserved hypothetical protein-                               | 60 | 13 | 18 | 68  | 59  | 46 |
| 36917  | conserved hypothetical protein-                               | 60 | 13 | 18 | 68  | 59  | 46 |
| 36958  | conserved hypothetical protein-                               | 60 | 13 | 18 | 68  | 59  | 46 |
| 376554 | dUTP diphosphatase family protein-                            | 60 | 13 | 18 | 68  | 59  | 46 |
| 385379 | ycfA-like family protein-                                     | 60 | 13 | 18 | 68  | 59  | 46 |
| 40152  | conserved hypothetical protein-                               | 60 | 13 | 18 | 68  | 59  | 46 |
| 401692 | recF/RecN/SMC N terminal domain protein-                      | 60 | 13 | 18 | 68  | 59  | 46 |
| 40898  | hypothetical protein-                                         | 60 | 13 | 18 | 68  | 59  | 46 |
| 428923 | conserved hypothetical protein-                               | 60 | 13 | 18 | 68  | 59  | 46 |
| 432281 | antirestriction family protein-                               | 60 | 13 | 18 | 68  | 59  | 46 |
| 434194 | conserved hypothetical protein-                               | 60 | 13 | 18 | 68  | 59  | 46 |
| 460873 | DNA primase catalytic core, N-terminal domain protein-        | 60 | 13 | 18 | 68  | 59  | 46 |
| 487640 | conserved hypothetical protein-                               | 60 | 13 | 18 | 68  | 59  | 46 |
| 487643 | hypothetical protein-                                         | 60 | 13 | 18 | 68  | 59  | 46 |
| 487661 | hypothetical protein-                                         | 60 | 13 | 18 | 68  | 59  | 46 |
| 514938 | conserved hypothetical protein-                               | 60 | 13 | 18 | 68  | 59  | 46 |
| 532864 | conserved hypothetical protein-                               | 60 | 13 | 18 | 68  | 59  | 46 |
| 532866 | conserved hypothetical protein-                               | 60 | 13 | 18 | 68  | 59  | 46 |
| 540998 | 5'-3' exonuclease, C-terminal SAM fold family protein-        | 60 | 13 | 18 | 68  | 59  | 46 |
| 541057 | conserved hypothetical protein-                               | 60 | 13 | 18 | 68  | 59  | 46 |
| 55212  | conserved hypothetical protein-                               | 60 | 13 | 18 | 68  | 59  | 46 |
| 554124 | putative domain protein-                                      | 60 | 13 | 18 | 68  | 59  | 46 |
| 554563 | DEAD/DEAH box helicase family protein-                        | 60 | 13 | 18 | 68  | 59  | 46 |
| 573157 | exonuclease family protein-                                   | 60 | 13 | 18 | 68  | 59  | 46 |
| 573257 | conserved hypothetical protein-                               | 60 | 13 | 18 | 68  | 59  | 46 |
| 591047 | hypothetical protein-                                         | 60 | 13 | 18 | 68  | 59  | 46 |
| 595662 | AAA domain family protein-                                    | 60 | 13 | 18 | 68  | 59  | 46 |
| 59777  | conserved hypothetical protein-                               | 60 | 13 | 18 | 68  | 59  | 46 |
| 59791  | conserved hypothetical protein-                               | 60 | 13 | 18 | 68  | 59  | 46 |
| 602994 | conserved hypothetical protein-                               | 60 | 13 | 18 | 68  | 59  | 46 |
| 603007 | hypothetical protein-                                         | 60 | 13 | 18 | 68  | 59  | 46 |
| 623563 | conserved hypothetical protein-                               | 60 | 13 | 18 | 68  | 59  | 46 |
| 632301 | putative regulator-                                           | 60 | 13 | 18 | 68  | 59  | 46 |
| 647902 | conserved hypothetical protein-                               | 60 | 13 | 18 | 68  | 59  | 46 |
| 655838 | dnaB-like helicase C terminal domain protein-                 | 60 | 13 | 18 | 68  | 59  | 46 |
| 655913 | conserved hypothetical protein-                               | 60 | 13 | 18 | 68  | 59  | 46 |
| 691817 | conserved hypothetical protein-                               | 60 | 13 | 18 | 68  | 59  | 46 |
| 706486 | DNA polymerase III, alpha subunit-                            | 60 | 13 | 18 | 68  | 59  | 46 |
| 706535 | NACHT domain protein-                                         | 60 | 13 | 18 | 68  | 59  | 46 |

|        |                                                              |    |    |    |    |     |     |
|--------|--------------------------------------------------------------|----|----|----|----|-----|-----|
| 724066 | conserved hypothetical protein-                              | 60 | 13 | 18 | 68 | 59  | 46  |
| 724104 | RNase H family protein-                                      | 60 | 13 | 18 | 68 | 59  | 46  |
| 739694 | ribonucleotide reductase, small chain family protein-        | 60 | 13 | 18 | 68 | 59  | 46  |
| 764647 | conserved hypothetical protein-                              | 60 | 13 | 18 | 68 | 59  | 46  |
| 778206 | conserved hypothetical protein-                              | 60 | 13 | 18 | 68 | 59  | 46  |
| 783511 | conserved hypothetical protein-                              | 60 | 13 | 18 | 68 | 59  | 46  |
| 798417 | conserved hypothetical protein-                              | 60 | 13 | 18 | 68 | 59  | 46  |
| 804447 | hypothetical protein-                                        | 60 | 13 | 18 | 68 | 59  | 46  |
| 804448 | HTH domain protein-                                          | 60 | 13 | 18 | 68 | 59  | 46  |
| 804450 | conserved hypothetical protein-                              | 60 | 13 | 18 | 68 | 59  | 46  |
| 804455 | conserved hypothetical protein-                              | 60 | 13 | 18 | 68 | 59  | 46  |
| 804479 | conserved hypothetical protein-                              | 60 | 13 | 18 | 68 | 59  | 46  |
| 804483 | thymidylate synthase complementing family protein-           | 60 | 13 | 18 | 68 | 59  | 46  |
| 804496 | conserved hypothetical protein-                              | 60 | 13 | 18 | 68 | 59  | 46  |
| 174319 | conserved hypothetical protein-                              | 53 | 20 | 27 | 54 | 73  | 57  |
| 670368 | conserved hypothetical protein-                              | 65 | 8  | 11 | 80 | 47  | 37  |
| 171107 | hypothetical protein-                                        | 60 | 13 | 18 | 69 | 58  | 46  |
| 242359 | conserved hypothetical protein-                              | 60 | 13 | 18 | 69 | 58  | 46  |
| 247757 | conserved hypothetical protein-                              | 60 | 13 | 18 | 69 | 58  | 46  |
| 366413 | conserved hypothetical protein-                              | 60 | 13 | 18 | 69 | 58  | 46  |
| 36967  | hypothetical protein-                                        | 60 | 13 | 18 | 69 | 58  | 46  |
| 385323 | conserved hypothetical protein-                              | 60 | 13 | 18 | 69 | 58  | 46  |
| 385378 | cell Wall Hydrolase family protein-                          | 60 | 13 | 18 | 69 | 58  | 46  |
| 40965  | von Willebrand factor type A domain protein-                 | 60 | 13 | 18 | 69 | 58  | 46  |
| 460880 | conserved hypothetical protein-                              | 60 | 13 | 18 | 69 | 58  | 46  |
| 514952 | conserved hypothetical protein-                              | 60 | 13 | 18 | 69 | 58  | 46  |
| 623567 | conserved hypothetical protein-                              | 60 | 13 | 18 | 69 | 58  | 46  |
| 655848 | conserved hypothetical protein-                              | 60 | 13 | 18 | 69 | 58  | 46  |
| 764655 | conserved hypothetical protein-                              | 60 | 13 | 18 | 69 | 58  | 46  |
| 778131 | ATP dependent DNA ligase domain protein-                     | 60 | 13 | 18 | 69 | 58  | 46  |
| 804517 | guanylate kinase family protein-                             | 60 | 13 | 18 | 69 | 58  | 46  |
| 804520 | conserved hypothetical protein-                              | 60 | 13 | 18 | 69 | 58  | 46  |
| 539482 | esterase-                                                    | 36 | 37 | 51 | 27 | 100 | 79  |
| 271682 | phage T7 tail fibre family protein-                          | 30 | 43 | 59 | 19 | 108 | 85  |
| 343959 | flagellar system-associated repeat family protein-           | 51 | 22 | 30 | 51 | 76  | 60  |
| 806136 | conserved hypothetical protein-                              | 51 | 22 | 30 | 51 | 76  | 60  |
| 364501 | putative outer membrane protein A-                           | 53 | 20 | 27 | 55 | 72  | 57  |
| 612587 | conserved hypothetical protein-                              | 71 | 2  | 3  | 98 | 29  | 23  |
| 11446  | acetyltransferase domain protein-                            | 14 | 59 | 81 | 3  | 124 | 98  |
| 321086 | acetyltransferase domain protein-                            | 14 | 59 | 81 | 3  | 124 | 98  |
| 36766  | acetyltransferase domain protein-                            | 14 | 59 | 81 | 3  | 124 | 98  |
| 440868 | conserved hypothetical protein-                              | 14 | 59 | 81 | 3  | 124 | 98  |
| 508439 | acetyltransferase domain protein-                            | 14 | 59 | 81 | 3  | 124 | 98  |
| 18215  | putative membrane protein-                                   | 11 | 62 | 85 | 1  | 126 | 99  |
| 238891 | response regulator-                                          | 11 | 62 | 85 | 1  | 126 | 99  |
| 278217 | phage head morphogenesis , SPP1 gp7 family domain protein-   | 11 | 62 | 85 | 1  | 126 | 99  |
| 356763 | efflux transporter, RND family, MFP subunit-                 | 11 | 62 | 85 | 1  | 126 | 99  |
| 378250 | 4-hydroxyproline epimerase-                                  | 11 | 62 | 85 | 1  | 126 | 99  |
| 397981 | putative cation efflux system protein-                       | 11 | 62 | 85 | 1  | 126 | 99  |
| 417214 | response regulator-                                          | 11 | 62 | 85 | 1  | 126 | 99  |
| 419675 | phage head morphogenesis , SPP1 gp7 family domain protein-   | 11 | 62 | 85 | 1  | 126 | 99  |
| 425025 | dihydrodipicolinate synthetase family protein-               | 11 | 62 | 85 | 1  | 126 | 99  |
| 446134 | major Facilitator Superfamily protein-                       | 11 | 62 | 85 | 1  | 126 | 99  |
| 528067 | phage head morphogenesis , SPP1 gp7 family domain protein-   | 11 | 62 | 85 | 1  | 126 | 99  |
| 541743 | pyridine nucleotide-disulfide oxidoreductase family protein- | 11 | 62 | 85 | 1  | 126 | 99  |
| 634626 | pyridine nucleotide-disulfide oxidoreductase family protein- | 11 | 62 | 85 | 1  | 126 | 99  |
| 636526 | winged helix-turn-helix DNA-binding family protein-          | 11 | 62 | 85 | 1  | 126 | 99  |
| 656154 | efflux transporter, RND family, MFP subunit-                 | 11 | 62 | 85 | 1  | 126 | 99  |
| 760348 | phage head morphogenesis , SPP1 gp7 family domain protein-   | 11 | 62 | 85 | 1  | 126 | 99  |
| 782879 | 2Fe-2S iron-sulfur cluster binding domain protein-           | 11 | 62 | 85 | 1  | 126 | 99  |
| 80372  | phage head morphogenesis , SPP1 gp7 family domain protein-   | 11 | 62 | 85 | 1  | 126 | 99  |
| 99139  | phage head morphogenesis , SPP1 gp7 family domain protein-   | 11 | 62 | 85 | 1  | 126 | 99  |
| 101116 | putative Peptidoglycan domain protein-                       | 9  | 64 | 88 | 0  | 127 | 100 |
| 102457 | putative Peptidoglycan domain protein-                       | 9  | 64 | 88 | 0  | 127 | 100 |
| 103649 | putative Peptidoglycan domain protein-                       | 9  | 64 | 88 | 0  | 127 | 100 |
| 120872 | putative Peptidoglycan domain protein-                       | 9  | 64 | 88 | 0  | 127 | 100 |
| 21304  | putative Peptidoglycan domain protein-                       | 9  | 64 | 88 | 0  | 127 | 100 |
| 278244 | putative Peptidoglycan domain protein-                       | 9  | 64 | 88 | 0  | 127 | 100 |
| 279496 | putative Peptidoglycan domain protein-                       | 9  | 64 | 88 | 0  | 127 | 100 |
| 336794 | putative Peptidoglycan domain protein-                       | 9  | 64 | 88 | 0  | 127 | 100 |
| 337039 | putative Peptidoglycan domain protein-                       | 9  | 64 | 88 | 0  | 127 | 100 |
| 346653 | putative Peptidoglycan domain protein-                       | 9  | 64 | 88 | 0  | 127 | 100 |
| 354279 | putative Peptidoglycan domain protein-                       | 9  | 64 | 88 | 0  | 127 | 100 |
| 360077 | hypothetical protein-                                        | 9  | 64 | 88 | 0  | 127 | 100 |
| 363173 | putative Peptidoglycan domain protein-                       | 9  | 64 | 88 | 0  | 127 | 100 |
| 3762   | putative Peptidoglycan domain protein-                       | 9  | 64 | 88 | 0  | 127 | 100 |
| 426693 | general stress protein 14-                                   | 9  | 64 | 88 | 0  | 127 | 100 |
| 440371 | putative Peptidoglycan domain protein-                       | 9  | 64 | 88 | 0  | 127 | 100 |
| 44374  | putative Peptidoglycan domain protein-                       | 9  | 64 | 88 | 0  | 127 | 100 |
| 454768 | putative Peptidoglycan domain protein-                       | 9  | 64 | 88 | 0  | 127 | 100 |
| 473580 | putative Peptidoglycan domain protein-                       | 9  | 64 | 88 | 0  | 127 | 100 |
| 509465 | putative Peptidoglycan domain protein-                       | 9  | 64 | 88 | 0  | 127 | 100 |
| 543512 | putative Peptidoglycan domain protein-                       | 9  | 64 | 88 | 0  | 127 | 100 |
| 58600  | putative Peptidoglycan domain protein-                       | 9  | 64 | 88 | 0  | 127 | 100 |
| 601310 | putative Peptidoglycan domain protein-                       | 9  | 64 | 88 | 0  | 127 | 100 |
| 602088 | putative Peptidoglycan domain protein-                       | 9  | 64 | 88 | 0  | 127 | 100 |
| 630242 | putative Peptidoglycan domain protein-                       | 9  | 64 | 88 | 0  | 127 | 100 |
| 667397 | putative Peptidoglycan domain protein-                       | 9  | 64 | 88 | 0  | 127 | 100 |
| 700122 | putative Peptidoglycan domain protein-                       | 9  | 64 | 88 | 0  | 127 | 100 |
| 724743 | putative Peptidoglycan domain protein-                       | 9  | 64 | 88 | 0  | 127 | 100 |
| 725147 | putative Peptidoglycan domain protein-                       | 9  | 64 | 88 | 0  | 127 | 100 |
| 731860 | putative Peptidoglycan domain protein-                       | 9  | 64 | 88 | 0  | 127 | 100 |
| 732233 | putative Peptidoglycan domain protein-                       | 9  | 64 | 88 | 0  | 127 | 100 |
| 750341 | putative Peptidoglycan domain protein-                       | 9  | 64 | 88 | 0  | 127 | 100 |
| 760323 | putative Peptidoglycan domain protein-                       | 9  | 64 | 88 | 0  | 127 | 100 |

|        |                                                                                  |    |    |    |     |     |     |
|--------|----------------------------------------------------------------------------------|----|----|----|-----|-----|-----|
| 802544 | putative Peptidoglycan domain protein-                                           | 9  | 64 | 88 | 0   | 127 | 100 |
| 80536  | putative Peptidoglycan domain protein-                                           | 9  | 64 | 88 | 0   | 127 | 100 |
| 806158 | putative Peptidoglycan domain protein-                                           | 9  | 64 | 88 | 0   | 127 | 100 |
| 412177 | conserved hypothetical protein-                                                  | 22 | 51 | 70 | 10  | 117 | 92  |
| 358828 | phage T7 tail fibre family protein-                                              | 28 | 45 | 62 | 17  | 110 | 87  |
| 506592 | fatty acid desaturase family protein-                                            | 28 | 45 | 62 | 17  | 110 | 87  |
| 14442  | tape measure domain protein-                                                     | 66 | 7  | 10 | 84  | 43  | 34  |
| 257915 | conserved hypothetical protein-                                                  | 38 | 35 | 48 | 30  | 97  | 76  |
| 40081  | conserved hypothetical protein-                                                  | 42 | 31 | 42 | 37  | 90  | 71  |
| 727345 | conserved hypothetical protein-                                                  | 42 | 31 | 42 | 37  | 90  | 71  |
| 230602 | conserved hypothetical protein-                                                  | 15 | 58 | 79 | 4   | 123 | 97  |
| 486233 | conserved hypothetical protein-                                                  | 15 | 58 | 79 | 4   | 123 | 97  |
| 805161 | efflux transporter, RND family, MFP subunit-                                     | 15 | 58 | 79 | 4   | 123 | 97  |
| 722277 | autotransporter beta-domain protein-                                             | 34 | 39 | 53 | 25  | 102 | 80  |
| 194075 | phage family protein-                                                            | 44 | 29 | 40 | 40  | 87  | 69  |
| 514023 | phage family protein-                                                            | 44 | 29 | 40 | 40  | 87  | 69  |
| 730123 | phage family protein-                                                            | 44 | 29 | 40 | 40  | 87  | 69  |
| 436290 | conserved hypothetical protein-                                                  | 67 | 6  | 8  | 86  | 41  | 32  |
| 502758 | HAD hydrolase, IA, variant 1 family protein-                                     | 38 | 35 | 48 | 31  | 96  | 76  |
| 739283 | HAD hydrolase, IA, variant 1 family protein-                                     | 38 | 35 | 48 | 31  | 96  | 76  |
| 213723 | conserved hypothetical protein-                                                  | 72 | 1  | 1  | 102 | 25  | 20  |
| 18676  | conserved hypothetical protein-                                                  | 60 | 13 | 18 | 70  | 57  | 45  |
| 320772 | cobQ/CobB/MinD/ParA nucleotide binding domain protein-                           | 60 | 13 | 18 | 70  | 57  | 45  |
| 4982   | conserved hypothetical protein-                                                  | 60 | 13 | 18 | 70  | 57  | 45  |
| 59836  | conserved hypothetical protein-                                                  | 60 | 13 | 18 | 70  | 57  | 45  |
| 623626 | conserved hypothetical protein-                                                  | 60 | 13 | 18 | 70  | 57  | 45  |
| 632022 | bacterial Ig-like domain family protein-                                         | 60 | 13 | 18 | 70  | 57  | 45  |
| 303210 | archaeal ATPase family protein-                                                  | 55 | 18 | 25 | 60  | 67  | 53  |
| 167147 | conserved hypothetical protein-                                                  | 65 | 8  | 11 | 81  | 46  | 36  |
| 297385 | putative cytosine-specific DNA methylase-                                        | 65 | 8  | 11 | 81  | 46  | 36  |
| 429785 | conserved hypothetical protein-                                                  | 65 | 8  | 11 | 81  | 46  | 36  |
| 807165 | conserved hypothetical protein-                                                  | 24 | 49 | 67 | 13  | 114 | 90  |
| 366888 | prepilin-type N-terminal cleavage/methylation domain protein-                    | 68 | 5  | 7  | 90  | 37  | 29  |
| 627265 | prepilin-type N-terminal cleavage/methylation domain protein-                    | 68 | 5  | 7  | 90  | 37  | 29  |
| 667001 | prepilin-type N-terminal cleavage/methylation domain protein-                    | 68 | 5  | 7  | 90  | 37  | 29  |
| 767921 | prepilin-type N-terminal cleavage/methylation domain protein-                    | 68 | 5  | 7  | 90  | 37  | 29  |
| 77024  | type IV pilus modification protein PilV-                                         | 68 | 5  | 7  | 90  | 37  | 29  |
| 91840  | prepilin-type N-terminal cleavage/methylation domain protein-                    | 68 | 5  | 7  | 90  | 37  | 29  |
| 98029  | putative outer membrane protein A-                                               | 68 | 5  | 7  | 90  | 37  | 29  |
| 294414 | acetyltransferase domain protein-                                                | 40 | 33 | 45 | 34  | 93  | 73  |
| 391799 | conserved hypothetical protein-                                                  | 71 | 2  | 3  | 99  | 28  | 22  |
| 18689  | conserved hypothetical protein-                                                  | 62 | 11 | 15 | 75  | 52  | 41  |
| 494731 | phage family protein-                                                            | 62 | 11 | 15 | 75  | 52  | 41  |
| 653703 | ABC transporter family protein-                                                  | 62 | 11 | 15 | 75  | 52  | 41  |
| 681930 | parB-like nuclease domain protein-                                               | 62 | 11 | 15 | 75  | 52  | 41  |
| 746957 | putative aBC transporter ATP-binding protein-                                    | 62 | 11 | 15 | 75  | 52  | 41  |
| 764739 | thioredoxin domain protein-                                                      | 62 | 11 | 15 | 75  | 52  | 41  |
| 756759 | tetratricopeptide repeat family protein-                                         | 36 | 37 | 51 | 28  | 99  | 78  |
| 139290 | conserved hypothetical protein-                                                  | 12 | 61 | 84 | 2   | 125 | 98  |
| 206924 | 3-beta hydroxysteroid dehydrogenase/isomerase family protein-                    | 12 | 61 | 84 | 2   | 125 | 98  |
| 211458 | conserved hypothetical protein-                                                  | 12 | 61 | 84 | 2   | 125 | 98  |
| 256366 | conserved hypothetical protein-                                                  | 12 | 61 | 84 | 2   | 125 | 98  |
| 334711 | conserved hypothetical protein-                                                  | 12 | 61 | 84 | 2   | 125 | 98  |
| 408844 | conserved hypothetical protein-                                                  | 12 | 61 | 84 | 2   | 125 | 98  |
| 440372 | putative membrane protein-                                                       | 12 | 61 | 84 | 2   | 125 | 98  |
| 463333 | conserved hypothetical protein-                                                  | 12 | 61 | 84 | 2   | 125 | 98  |
| 473579 | conserved hypothetical protein-                                                  | 12 | 61 | 84 | 2   | 125 | 98  |
| 511956 | bacterial regulatory, tetR family protein-                                       | 12 | 61 | 84 | 2   | 125 | 98  |
| 518895 | conserved hypothetical protein-                                                  | 12 | 61 | 84 | 2   | 125 | 98  |
| 52061  | amidohydrolase family protein-                                                   | 12 | 61 | 84 | 2   | 125 | 98  |
| 575574 | lysR substrate binding domain protein-                                           | 12 | 61 | 84 | 2   | 125 | 98  |
| 575590 | lysR substrate binding domain protein-                                           | 12 | 61 | 84 | 2   | 125 | 98  |
| 579892 | conserved hypothetical protein-                                                  | 12 | 61 | 84 | 2   | 125 | 98  |
| 593192 | major facilitator superfamily permease domain protein-                           | 12 | 61 | 84 | 2   | 125 | 98  |
| 606005 | phage head morphogenesis , SPP1 gp7 family domain protein-                       | 12 | 61 | 84 | 2   | 125 | 98  |
| 710213 | phage head morphogenesis , SPP1 gp7 family domain protein-                       | 12 | 61 | 84 | 2   | 125 | 98  |
| 80193  | bacterial regulatory, tetR family protein-                                       | 12 | 61 | 84 | 2   | 125 | 98  |
| 89953  | citrate transporter family protein-                                              | 12 | 61 | 84 | 2   | 125 | 98  |
| 100470 | conserved hypothetical protein-                                                  | 22 | 51 | 70 | 11  | 116 | 91  |
| 294143 | stress-responsive nuclear envelope family protein-                               | 25 | 48 | 66 | 14  | 113 | 89  |
| 415932 | stress-responsive nuclear envelope family protein-                               | 25 | 48 | 66 | 14  | 113 | 89  |
| 636288 | imcF-related N-terminal domain protein-                                          | 23 | 50 | 68 | 12  | 115 | 91  |
| 419668 | conserved hypothetical protein-                                                  | 42 | 31 | 42 | 38  | 89  | 70  |
| 347301 | arabinose-binding domain of AraC transcription regulator, N-term family protein- | 27 | 46 | 63 | 17  | 110 | 87  |
| 438654 | outer membrane transport family protein-                                         | 27 | 46 | 63 | 17  | 110 | 87  |
| 73943  | arabinose-binding domain of AraC transcription regulator, N-term family protein- | 27 | 46 | 63 | 17  | 110 | 87  |
| 554596 | conserved hypothetical protein-                                                  | 60 | 13 | 18 | 71  | 56  | 44  |
| 804414 | putative phage tail protein-                                                     | 60 | 13 | 18 | 71  | 56  | 44  |
| 533394 | putative membrane protein-                                                       | 33 | 40 | 55 | 25  | 102 | 80  |
| 270900 | conserved hypothetical protein-                                                  | 55 | 18 | 25 | 61  | 66  | 52  |
| 474392 | conserved hypothetical protein-                                                  | 55 | 18 | 25 | 61  | 66  | 52  |
| 261731 | SMI1 / KNR4 family protein-                                                      | 72 | 1  | 1  | 104 | 23  | 18  |
| 293922 | NADP oxidoreductase coenzyme F420-dependent family protein-                      | 13 | 60 | 82 | 3   | 124 | 98  |
| 749853 | conserved hypothetical protein-                                                  | 13 | 60 | 82 | 3   | 124 | 98  |
| 452165 | haemagglutinin family protein-                                                   | 30 | 43 | 59 | 21  | 106 | 83  |
| 724666 | conserved hypothetical protein-                                                  | 43 | 30 | 41 | 40  | 87  | 69  |
| 635327 | KR domain protein-                                                               | 34 | 39 | 53 | 26  | 101 | 80  |
| 125044 | HNH endonuclease family protein-                                                 | 45 | 28 | 38 | 43  | 84  | 66  |
| 130922 | HNH endonuclease family protein-                                                 | 45 | 28 | 38 | 43  | 84  | 66  |
| 475623 | HNH endonuclease family protein-                                                 | 45 | 28 | 38 | 43  | 84  | 66  |
| 171055 | putative major capsid protein-                                                   | 25 | 48 | 66 | 15  | 112 | 88  |
| 195582 | conserved hypothetical protein-                                                  | 25 | 48 | 66 | 15  | 112 | 88  |
| 302813 | L-serine ammonia-lyase-                                                          | 10 | 63 | 86 | 1   | 126 | 99  |
| 397744 | conserved hypothetical protein-                                                  | 10 | 63 | 86 | 1   | 126 | 99  |
| 4275   | bacterial regulatory helix-turn-helix , lysR family protein-                     | 10 | 63 | 86 | 1   | 126 | 99  |

|        |                                                             |    |    |    |    |     |     |
|--------|-------------------------------------------------------------|----|----|----|----|-----|-----|
| 563119 | conserved hypothetical protein-                             | 10 | 63 | 86 | 1  | 126 | 99  |
| 621762 | 2Fe-2S iron-sulfur cluster binding domain protein-          | 10 | 63 | 86 | 1  | 126 | 99  |
| 778961 | conserved hypothetical protein-                             | 10 | 63 | 86 | 1  | 126 | 99  |
| 400639 | conserved hypothetical protein-                             | 51 | 22 | 30 | 54 | 73  | 57  |
| 128996 | conserved hypothetical protein-                             | 62 | 11 | 15 | 76 | 51  | 40  |
| 129000 | phage capsid family protein-                                | 62 | 11 | 15 | 76 | 51  | 40  |
| 129002 | conserved hypothetical protein-                             | 62 | 11 | 15 | 76 | 51  | 40  |
| 288442 | conserved hypothetical protein-                             | 62 | 11 | 15 | 76 | 51  | 40  |
| 355001 | conserved hypothetical protein-                             | 62 | 11 | 15 | 76 | 51  | 40  |
| 376611 | conserved hypothetical protein-                             | 62 | 11 | 15 | 76 | 51  | 40  |
| 401754 | conserved hypothetical protein-                             | 62 | 11 | 15 | 76 | 51  | 40  |
| 401762 | conserved hypothetical protein-                             | 62 | 11 | 15 | 76 | 51  | 40  |
| 40928  | putative lipoprotein-                                       | 62 | 11 | 15 | 76 | 51  | 40  |
| 428819 | conserved hypothetical protein-                             | 62 | 11 | 15 | 76 | 51  | 40  |
| 456749 | conserved hypothetical protein-                             | 62 | 11 | 15 | 76 | 51  | 40  |
| 554553 | terminase-like family protein-                              | 62 | 11 | 15 | 76 | 51  | 40  |
| 561283 | conserved hypothetical protein-                             | 62 | 11 | 15 | 76 | 51  | 40  |
| 595623 | conserved hypothetical protein-                             | 62 | 11 | 15 | 76 | 51  | 40  |
| 623613 | winged helix-turn-helix DNA-binding family protein-         | 62 | 11 | 15 | 76 | 51  | 40  |
| 632359 | parB-like nuclease domain protein-                          | 62 | 11 | 15 | 76 | 51  | 40  |
| 653820 | hypothetical protein-                                       | 62 | 11 | 15 | 76 | 51  | 40  |
| 234852 | conserved hypothetical protein-                             | 35 | 38 | 52 | 28 | 99  | 78  |
| 184483 | low molecular weight protein-tyrosine-phosphatase ptp-      | 8  | 65 | 89 | 0  | 127 | 100 |
| 198532 | low molecular weight protein-tyrosine-phosphatase ptp-      | 8  | 65 | 89 | 0  | 127 | 100 |
| 22994  | low molecular weight protein-tyrosine-phosphatase ptp-      | 8  | 65 | 89 | 0  | 127 | 100 |
| 391179 | low molecular weight protein-tyrosine-phosphatase ptp-      | 8  | 65 | 89 | 0  | 127 | 100 |
| 422376 | low molecular weight protein-tyrosine-phosphatase ptp-      | 8  | 65 | 89 | 0  | 127 | 100 |
| 501533 | putative Peptidoglycan domain protein-                      | 8  | 65 | 89 | 0  | 127 | 100 |
| 510360 | low molecular weight protein-tyrosine-phosphatase ptp-      | 8  | 65 | 89 | 0  | 127 | 100 |
| 529258 | low molecular weight protein-tyrosine-phosphatase ptp-      | 8  | 65 | 89 | 0  | 127 | 100 |
| 530511 | low molecular weight protein-tyrosine-phosphatase ptp-      | 8  | 65 | 89 | 0  | 127 | 100 |
| 719201 | low molecular weight protein-tyrosine-phosphatase ptp-      | 8  | 65 | 89 | 0  | 127 | 100 |
| 804011 | conserved hypothetical protein-                             | 28 | 45 | 62 | 19 | 108 | 85  |
| 254584 | transposase IS66 family protein-                            | 31 | 42 | 58 | 23 | 104 | 82  |
| 781623 | transposase IS66 family protein-                            | 31 | 42 | 58 | 23 | 104 | 82  |
| 41686  | putative lipoprotein-                                       | 41 | 32 | 44 | 37 | 90  | 71  |
| 395008 | conserved hypothetical protein-                             | 40 | 33 | 45 | 36 | 91  | 72  |
| 747913 | cupin family protein-                                       | 29 | 44 | 60 | 20 | 107 | 84  |
| 325392 | stress-responsive nuclear envelope family protein-          | 24 | 49 | 67 | 14 | 113 | 89  |
| 329642 | conserved hypothetical protein-                             | 24 | 49 | 67 | 14 | 113 | 89  |
| 475605 | stress-responsive nuclear envelope family protein-          | 24 | 49 | 67 | 14 | 113 | 89  |
| 572950 | conserved hypothetical protein-                             | 24 | 49 | 67 | 14 | 113 | 89  |
| 573648 | conserved hypothetical protein-                             | 24 | 49 | 67 | 14 | 113 | 89  |
| 696584 | stress-responsive nuclear envelope family protein-          | 24 | 49 | 67 | 14 | 113 | 89  |
| 767529 | conserved hypothetical protein-                             | 24 | 49 | 67 | 14 | 113 | 89  |
| 785970 | conserved hypothetical protein-                             | 24 | 49 | 67 | 14 | 113 | 89  |
| 791479 | stress-responsive nuclear envelope family protein-          | 24 | 49 | 67 | 14 | 113 | 89  |
| 549463 | conserved hypothetical protein-                             | 22 | 51 | 70 | 12 | 115 | 91  |
| 42265  | amino acid adenylation domain protein-                      | 15 | 58 | 79 | 5  | 122 | 96  |
| 21348  | conserved hypothetical protein-                             | 18 | 55 | 75 | 8  | 119 | 94  |
| 219397 | conserved hypothetical protein-                             | 18 | 55 | 75 | 8  | 119 | 94  |
| 304548 | conserved hypothetical protein-                             | 18 | 55 | 75 | 8  | 119 | 94  |
| 440859 | conserved hypothetical protein-                             | 18 | 55 | 75 | 8  | 119 | 94  |
| 474177 | tonB-dependent siderophore receptor family protein-         | 11 | 62 | 85 | 2  | 125 | 98  |
| 173547 | putative transmembrane protein-                             | 33 | 40 | 55 | 26 | 101 | 80  |
| 539965 | conserved hypothetical protein-                             | 51 | 22 | 30 | 55 | 72  | 57  |
| 570900 | conserved hypothetical protein-                             | 14 | 59 | 81 | 4  | 123 | 97  |
| 576909 | conserved hypothetical protein-                             | 15 | 21 | 21 | 69 | 58  | 46  |
| 641159 | putative membrane protein-                                  | 46 | 27 | 37 | 47 | 80  | 63  |
| 805080 | conserved hypothetical protein-                             | 50 | 23 | 32 | 54 | 73  | 57  |
| 432619 | conserved hypothetical protein-                             | 66 | 7  | 10 | 87 | 40  | 31  |
| 127082 | conserved hypothetical protein-                             | 34 | 39 | 53 | 28 | 99  | 78  |
| 388381 | putative major capsid protein-                              | 25 | 48 | 66 | 16 | 111 | 87  |
| 330211 | HAMP domain protein-                                        | 12 | 61 | 84 | 3  | 124 | 98  |
| 736471 | UTRA domain protein-                                        | 12 | 61 | 84 | 3  | 124 | 98  |
| 475638 | conserved hypothetical protein-                             | 35 | 38 | 52 | 29 | 98  | 77  |
| 336934 | conserved hypothetical protein-                             | 21 | 52 | 71 | 11 | 116 | 91  |
| 791488 | conserved hypothetical protein-                             | 19 | 54 | 74 | 9  | 118 | 93  |
| 3124   | conserved hypothetical protein-                             | 40 | 33 | 45 | 37 | 90  | 71  |
| 423279 | rhs element Vgr family protein-                             | 40 | 33 | 45 | 37 | 90  | 71  |
| 477633 | conserved hypothetical protein-                             | 40 | 33 | 45 | 37 | 90  | 71  |
| 646386 | conserved hypothetical protein-                             | 40 | 33 | 45 | 37 | 90  | 71  |
| 800888 | transposase IS66 family protein-                            | 31 | 42 | 58 | 24 | 103 | 81  |
| 501544 | heH/LEM domain protein-                                     | 41 | 32 | 44 | 39 | 88  | 69  |
| 162420 | putative restriction endonuclease PvuRts11-                 | 42 | 31 | 42 | 40 | 87  | 69  |
| 183322 | heH/LEM domain protein-                                     | 42 | 31 | 42 | 40 | 87  | 69  |
| 130003 | BRO family, N-terminal domain protein-                      | 63 | 10 | 14 | 81 | 46  | 36  |
| 326253 | conserved hypothetical protein-                             | 63 | 10 | 14 | 81 | 46  | 36  |
| 649546 | conserved hypothetical protein-                             | 63 | 10 | 14 | 81 | 46  | 36  |
| 27413  | phenylacetate-CoA oxygenase, PaaJ subunit-                  | 9  | 64 | 88 | 1  | 126 | 99  |
| 344317 | phenylacetic acid degradation protein paaN-                 | 9  | 64 | 88 | 1  | 126 | 99  |
| 448378 | 1,2-phenylacetyl-CoA epoxidase, subunit B-                  | 9  | 64 | 88 | 1  | 126 | 99  |
| 569644 | 3-oxoadipyl-CoA thiolase-                                   | 9  | 64 | 88 | 1  | 126 | 99  |
| 631752 | putative Peptidoglycan domain protein-                      | 9  | 64 | 88 | 1  | 126 | 99  |
| 634633 | 1,2-phenylacetyl-CoA epoxidase, subunit A-                  | 9  | 64 | 88 | 1  | 126 | 99  |
| 634640 | NADP oxidoreductase coenzyme F420-dependent family protein- | 9  | 64 | 88 | 1  | 126 | 99  |
| 652583 | bacterial transferase hexapeptide family protein-           | 9  | 64 | 88 | 1  | 126 | 99  |
| 678260 | 1,2-phenylacetyl-CoA epoxidase, subunit C-                  | 9  | 64 | 88 | 1  | 126 | 99  |
| 765322 | phenylacetate-CoA ligase-                                   | 9  | 64 | 88 | 1  | 126 | 99  |
| 803602 | putative Peptidoglycan domain protein-                      | 9  | 64 | 88 | 1  | 126 | 99  |
| 807211 | paaX-like C-terminal domain protein-                        | 9  | 64 | 88 | 1  | 126 | 99  |
| 777803 | conserved hypothetical protein-                             | 21 | 52 | 71 | 12 | 115 | 91  |
| 663880 | bacterial regulatory, tetR family protein-                  | 47 | 26 | 36 | 49 | 78  | 61  |
| 282240 | transposase DDE domain protein-                             | 24 | 49 | 67 | 15 | 112 | 88  |
| 336792 | conserved hypothetical protein-                             | 24 | 49 | 67 | 15 | 112 | 88  |

|        |                                                        |    |    |    |    |     |    |
|--------|--------------------------------------------------------|----|----|----|----|-----|----|
| 384314 | putative bacteriophage protein-                        | 24 | 49 | 67 | 15 | 112 | 88 |
| 275388 | xanthine dehydrogenase, molybdopterin binding subunit- | 14 | 59 | 81 | 5  | 122 | 96 |
| 314832 | conserved hypothetical protein-                        | 38 | 35 | 48 | 35 | 92  | 72 |
| 402563 | conserved hypothetical protein-                        | 38 | 35 | 48 | 35 | 92  | 72 |
| 552250 | conserved hypothetical protein-                        | 38 | 35 | 48 | 35 | 92  | 72 |
| 509467 | conserved hypothetical protein-                        | 24 | 49 | 67 | 16 | 111 | 87 |
| 423842 | integrase core domain protein-                         | 39 | 34 | 47 | 37 | 90  | 71 |
| 566630 | hypothetical protein-                                  | 39 | 34 | 47 | 37 | 90  | 71 |
| 362960 | tonB-dependent siderophore receptor family protein-    | 10 | 63 | 86 | 2  | 125 | 98 |
| 449730 | sugar (and other) transporter family protein-          | 10 | 63 | 86 | 2  | 125 | 98 |
| 337905 | ycfA-like family protein-                              | 31 | 42 | 58 | 25 | 102 | 80 |
| 530929 | ycfA-like family protein-                              | 31 | 42 | 58 | 25 | 102 | 80 |

Suppl Table 8. Centroids found in higher frequency in carbapenem sensitive isolates

| Centroid ID | Annotation                                                 | Sensitive_A | Sensitive_P | % Frequency | Resistant_A | Resistant_P | % Frequency |
|-------------|------------------------------------------------------------|-------------|-------------|-------------|-------------|-------------|-------------|
| 339381      | tonB dependent receptor family protein-                    | 8           | 65          | 89          | 93          | 34          | 27          |
| 399160      | tonB dependent receptor family protein-                    | 8           | 65          | 89          | 93          | 34          | 27          |
| 476321      | tonB dependent receptor family protein-                    | 8           | 65          | 89          | 93          | 34          | 27          |
| 607112      | tonB dependent receptor family protein-                    | 8           | 65          | 89          | 93          | 34          | 27          |
| 481603      | conserved hypothetical protein-                            | 39          | 34          | 47          | 125         | 2           | 2           |
| 14627       | helix-turn-helix domain protein-                           | 30          | 43          | 59          | 116         | 11          | 9           |
| 235734      | conserved hypothetical protein-                            | 39          | 34          | 47          | 123         | 4           | 3           |
| 346343      | POTRA domain, SHIB-type family protein-                    | 43          | 30          | 41          | 125         | 2           | 2           |
| 400060      | POTRA domain, SHIB-type family protein-                    | 43          | 30          | 41          | 125         | 2           | 2           |
| 86252       | POTRA domain, SHIB-type family protein-                    | 43          | 30          | 41          | 125         | 2           | 2           |
| 727946      | conserved hypothetical protein-                            | 40          | 33          | 45          | 123         | 4           | 3           |
| 496027      | conserved hypothetical protein-                            | 8           | 65          | 89          | 79          | 48          | 38          |
| 139033      | conserved hypothetical protein-                            | 48          | 25          | 34          | 127         | 0           | 0           |
| 351821      | glutamine amidotransferase class-I family protein-         | 8           | 65          | 89          | 78          | 49          | 39          |
| 186178      | putative carbapenem-associated resistance protein-         | 44          | 29          | 40          | 125         | 2           | 2           |
| 718372      | putative carbapenem-associated resistance protein-         | 44          | 29          | 40          | 125         | 2           | 2           |
| 528223      | conserved hypothetical protein-                            | 49          | 24          | 33          | 127         | 0           | 0           |
| 337738      | hypothetical protein-                                      | 9           | 64          | 88          | 79          | 48          | 38          |
| 714592      | peptidase S24-like family protein-                         | 47          | 26          | 36          | 126         | 1           | 1           |
| 473661      | rhs element Vgr family protein-                            | 50          | 23          | 32          | 127         | 0           | 0           |
| 198440      | polysaccharide deacetylase family protein-                 | 45          | 28          | 38          | 124         | 3           | 2           |
| 240857      | bacterial regulatory, tetR family protein-                 | 45          | 28          | 38          | 124         | 3           | 2           |
| 254588      | NADH:flavin oxidoreductase / NADH oxidase family protein-  | 45          | 28          | 38          | 124         | 3           | 2           |
| 46184       | DJ-1/Pfpl family protein-                                  | 45          | 28          | 38          | 124         | 3           | 2           |
| 582337      | putative antibiotic biosynthesis monooxygenase-            | 45          | 28          | 38          | 124         | 3           | 2           |
| 79557       | iron-containing alcohol dehydrogenase family protein-      | 45          | 28          | 38          | 124         | 3           | 2           |
| 625155      | putative membrane protein-                                 | 23          | 50          | 68          | 101         | 26          | 20          |
| 699851      | putative membrane protein-                                 | 23          | 50          | 68          | 101         | 26          | 20          |
| 627942      | methyltransferase domain protein-                          | 10          | 63          | 86          | 78          | 49          | 39          |
| 715203      | conserved hypothetical family protein-                     | 10          | 63          | 86          | 78          | 49          | 39          |
| 198595      | IMS HHH motif family protein-                              | 43          | 30          | 41          | 122         | 5           | 4           |
| 308577      | IMS HHH motif family protein-                              | 43          | 30          | 41          | 122         | 5           | 4           |
| 509462      | IMS HHH motif family protein-                              | 43          | 30          | 41          | 122         | 5           | 4           |
| 605971      | IMS HHH motif family protein-                              | 43          | 30          | 41          | 122         | 5           | 4           |
| 802542      | IMS HHH motif family protein-                              | 43          | 30          | 41          | 122         | 5           | 4           |
| 80529       | IMS HHH motif family protein-                              | 43          | 30          | 41          | 122         | 5           | 4           |
| 184987      | putative membrane protein-                                 | 46          | 27          | 37          | 124         | 3           | 2           |
| 452284      | polysaccharide deacetylase family protein-                 | 46          | 27          | 37          | 124         | 3           | 2           |
| 2134        | rhs element Vgr family protein-                            | 52          | 21          | 29          | 127         | 0           | 0           |
| 336354      | conserved hypothetical protein-                            | 41          | 32          | 44          | 120         | 7           | 6           |
| 660375      | conserved hypothetical protein-                            | 41          | 32          | 44          | 120         | 7           | 6           |
| 100804      | pseudaminic acid CMP-transferase-                          | 45          | 28          | 38          | 123         | 4           | 3           |
| 100807      | pseudaminic acid synthase-                                 | 45          | 28          | 38          | 123         | 4           | 3           |
| 255316      | pseudaminic acid synthase-                                 | 45          | 28          | 38          | 123         | 4           | 3           |
| 511553      | pseudaminic acid synthase-                                 | 45          | 28          | 38          | 123         | 4           | 3           |
| 662835      | UDP-N-acetylglucosamine 4,6-dehydratase-                   | 45          | 28          | 38          | 123         | 4           | 3           |
| 674582      | pseudaminic acid CMP-transferase-                          | 45          | 28          | 38          | 123         | 4           | 3           |
| 698803      | UDP-4-keto-6-deoxy-N-acetylglucosamine 4-aminotransferase- | 45          | 28          | 38          | 123         | 4           | 3           |
| 644560      | malonate transporter, MadM subunit-                        | 50          | 23          | 32          | 126         | 1           | 1           |
| 106578      | IMS HHH motif family protein-                              | 44          | 29          | 40          | 122         | 5           | 4           |
| 256370      | conserved hypothetical protein-                            | 44          | 29          | 40          | 122         | 5           | 4           |
| 263193      | IMS HHH motif family protein-                              | 44          | 29          | 40          | 122         | 5           | 4           |
| 357624      | IMS HHH motif family protein-                              | 44          | 29          | 40          | 122         | 5           | 4           |
| 375606      | conserved hypothetical protein-                            | 44          | 29          | 40          | 122         | 5           | 4           |
| 3766        | IMS HHH motif family protein-                              | 44          | 29          | 40          | 122         | 5           | 4           |
| 396254      | IMS HHH motif family protein-                              | 44          | 29          | 40          | 122         | 5           | 4           |
| 396738      | IMS HHH motif family protein-                              | 44          | 29          | 40          | 122         | 5           | 4           |
| 490711      | IMS HHH motif family protein-                              | 44          | 29          | 40          | 122         | 5           | 4           |
| 528031      | IMS HHH motif family protein-                              | 44          | 29          | 40          | 122         | 5           | 4           |
| 631900      | conserved hypothetical protein-                            | 44          | 29          | 40          | 122         | 5           | 4           |
| 720054      | IMS HHH motif family protein-                              | 44          | 29          | 40          | 122         | 5           | 4           |
| 725152      | IMS HHH motif family protein-                              | 44          | 29          | 40          | 122         | 5           | 4           |
| 730451      | IMS HHH motif family protein-                              | 44          | 29          | 40          | 122         | 5           | 4           |
| 471062      | S-formylglutathione hydrolase-                             | 47          | 26          | 36          | 124         | 3           | 2           |
| 589033      | rhs element Vgr family domain protein-                     | 49          | 24          | 33          | 125         | 2           | 2           |
| 646599      | AAA domain protein-                                        | 49          | 24          | 33          | 125         | 2           | 2           |
| 107479      | repressor protein-                                         | 26          | 47          | 64          | 102         | 25          | 20          |
| 480934      | metal-sensitive transcriptional repressor family protein-  | 41          | 32          | 44          | 119         | 8           | 6           |
| 107513      | amino acid permease family protein-                        | 22          | 51          | 70          | 96          | 31          | 24          |
| 688189      | FAD binding domain protein-                                | 22          | 51          | 70          | 96          | 31          | 24          |
| 768842      | cache domain protein-                                      | 22          | 51          | 70          | 96          | 31          | 24          |
| 801730      | hypothetical protein-                                      | 22          | 51          | 70          | 96          | 31          | 24          |
| 166585      | tetratricopeptide repeat family protein-                   | 54          | 19          | 26          | 127         | 0           | 0           |
| 543183      | sel1 repeat family protein-                                | 54          | 19          | 26          | 127         | 0           | 0           |
| 107480      | sugar (and other) transporter family protein-              | 26          | 47          | 64          | 101         | 26          | 20          |
| 107485      | outer membrane porin, OprD family protein-                 | 26          | 47          | 64          | 101         | 26          | 20          |
| 132707      | acyl-CoA dehydrogenase, N-terminal domain protein-         | 26          | 47          | 64          | 101         | 26          | 20          |
| 147226      | rieske [2Fe-2S] domain protein-                            | 26          | 47          | 64          | 101         | 26          | 20          |
| 154138      | conserved hypothetical protein-                            | 26          | 47          | 64          | 101         | 26          | 20          |
| 312686      | methyltransferase, TIGR00027 family protein-               | 26          | 47          | 64          | 101         | 26          | 20          |
| 324013      | FCD domain protein-                                        | 26          | 47          | 64          | 101         | 26          | 20          |
| 389623      | helix-turn-helix domain protein-                           | 26          | 47          | 64          | 101         | 26          | 20          |
| 407645      | flavin-binding monooxygenase-like family protein-          | 26          | 47          | 64          | 101         | 26          | 20          |
| 536636      | aldehyde dehydrogenase family protein-                     | 26          | 47          | 64          | 101         | 26          | 20          |
| 536664      | conserved hypothetical protein-                            | 26          | 47          | 64          | 101         | 26          | 20          |
| 557110      | multidrug resistance efflux transporter family protein-    | 26          | 47          | 64          | 101         | 26          | 20          |
| 591857      | AMP-binding enzyme family protein-                         | 26          | 47          | 64          | 101         | 26          | 20          |
| 626526      | hydroxycinnamoyl-CoA hydratase-lyase-                      | 26          | 47          | 64          | 101         | 26          | 20          |
| 626527      | acyl-CoA reductase family protein-                         | 26          | 47          | 64          | 101         | 26          | 20          |
| 667494      | NADH(P)-binding family protein-                            | 26          | 47          | 64          | 101         | 26          | 20          |
| 685478      | 2Fe-2S iron-sulfur cluster binding domain protein-         | 26          | 47          | 64          | 101         | 26          | 20          |
| 685489      | conserved hypothetical protein-                            | 26          | 47          | 64          | 101         | 26          | 20          |
| 685490      | alpha/beta hydrolase family protein-                       | 26          | 47          | 64          | 101         | 26          | 20          |

|        |                                                          |    |    |    |     |    |    |
|--------|----------------------------------------------------------|----|----|----|-----|----|----|
| 441600 | phage integrase family protein-                          | 50 | 23 | 32 | 125 | 2  | 2  |
| 455525 | phage integrase family protein-                          | 50 | 23 | 32 | 125 | 2  | 2  |
| 631748 | phage integrase family protein-                          | 50 | 23 | 32 | 125 | 2  | 2  |
| 86526  | phage integrase family protein-                          | 50 | 23 | 32 | 125 | 2  | 2  |
| 198594 | peptidase S24-like family protein-                       | 47 | 26 | 36 | 123 | 4  | 3  |
| 250478 | peptidase S24-like family protein-                       | 47 | 26 | 36 | 123 | 4  | 3  |
| 263194 | peptidase S24-like family protein-                       | 47 | 26 | 36 | 123 | 4  | 3  |
| 308576 | peptidase S24-like family protein-                       | 47 | 26 | 36 | 123 | 4  | 3  |
| 3767   | peptidase S24-like family protein-                       | 47 | 26 | 36 | 123 | 4  | 3  |
| 528030 | peptidase S24-like family protein-                       | 47 | 26 | 36 | 123 | 4  | 3  |
| 725153 | peptidase S24-like family protein-                       | 47 | 26 | 36 | 123 | 4  | 3  |
| 730452 | peptidase S24-like family protein-                       | 47 | 26 | 36 | 123 | 4  | 3  |
| 147261 | snoal-like domain protein-                               | 23 | 50 | 68 | 96  | 31 | 24 |
| 154115 | acyl-CoA reductase family protein-                       | 23 | 50 | 68 | 96  | 31 | 24 |
| 688195 | HTH domain protein-                                      | 23 | 50 | 68 | 96  | 31 | 24 |
| 142502 | conserved hypothetical protein-                          | 52 | 21 | 29 | 126 | 1  | 1  |
| 182920 | KR domain protein-                                       | 52 | 21 | 29 | 126 | 1  | 1  |
| 182926 | conserved hypothetical protein-                          | 52 | 21 | 29 | 126 | 1  | 1  |
| 483050 | alpha/beta hydrolase fold family protein-                | 52 | 21 | 29 | 126 | 1  | 1  |
| 565089 | lysR substrate binding domain protein-                   | 52 | 21 | 29 | 126 | 1  | 1  |
| 565094 | acyl-CoA dehydrogenase, N-terminal domain protein-       | 52 | 21 | 29 | 126 | 1  | 1  |
| 565095 | outer membrane transport family protein-                 | 52 | 21 | 29 | 126 | 1  | 1  |
| 565097 | sodium Bile acid symporter family protein-               | 52 | 21 | 29 | 126 | 1  | 1  |
| 141460 | putative membrane protein-                               | 49 | 24 | 33 | 124 | 3  | 2  |
| 185867 | parB-like nuclease domain protein-                       | 49 | 24 | 33 | 124 | 3  | 2  |
| 185869 | conserved hypothetical protein-                          | 49 | 24 | 33 | 124 | 3  | 2  |
| 235647 | conserved hypothetical protein-                          | 49 | 24 | 33 | 124 | 3  | 2  |
| 240888 | parB-like nuclease domain protein-                       | 49 | 24 | 33 | 124 | 3  | 2  |
| 240891 | conserved hypothetical protein-                          | 49 | 24 | 33 | 124 | 3  | 2  |
| 263995 | DEAD/DEAH box helicase family protein-                   | 49 | 24 | 33 | 124 | 3  | 2  |
| 344469 | putative glutamate 5-kinase-                             | 49 | 24 | 33 | 124 | 3  | 2  |
| 359713 | cobQ/CobB/MinD/ParA nucleotide binding domain protein-   | 49 | 24 | 33 | 124 | 3  | 2  |
| 359718 | conserved hypothetical protein-                          | 49 | 24 | 33 | 124 | 3  | 2  |
| 396857 | conserved hypothetical protein-                          | 49 | 24 | 33 | 124 | 3  | 2  |
| 44015  | initiator Replication family protein-                    | 49 | 24 | 33 | 124 | 3  | 2  |
| 455213 | phage lysozyme family protein-                           | 49 | 24 | 33 | 124 | 3  | 2  |
| 489352 | kaiC family protein-                                     | 49 | 24 | 33 | 124 | 3  | 2  |
| 542161 | conserved hypothetical protein-                          | 49 | 24 | 33 | 124 | 3  | 2  |
| 542168 | conserved hypothetical protein-                          | 49 | 24 | 33 | 124 | 3  | 2  |
| 542231 | ATP dependent DNA ligase domain protein-                 | 49 | 24 | 33 | 124 | 3  | 2  |
| 565461 | ABC transporter family protein-                          | 49 | 24 | 33 | 124 | 3  | 2  |
| 565494 | conserved hypothetical protein-                          | 49 | 24 | 33 | 124 | 3  | 2  |
| 696417 | DNA primase catalytic core, N-terminal domain protein-   | 49 | 24 | 33 | 124 | 3  | 2  |
| 696447 | conserved hypothetical protein-                          | 49 | 24 | 33 | 124 | 3  | 2  |
| 696458 | lysM domain protein-                                     | 49 | 24 | 33 | 124 | 3  | 2  |
| 712717 | conserved hypothetical protein-                          | 49 | 24 | 33 | 124 | 3  | 2  |
| 729012 | conserved hypothetical protein-                          | 49 | 24 | 33 | 124 | 3  | 2  |
| 779835 | conserved hypothetical protein-                          | 49 | 24 | 33 | 124 | 3  | 2  |
| 779840 | conserved hypothetical protein-                          | 49 | 24 | 33 | 124 | 3  | 2  |
| 779844 | conserved hypothetical protein-                          | 49 | 24 | 33 | 124 | 3  | 2  |
| 780783 | putative dNA-binding protein-                            | 49 | 24 | 33 | 124 | 3  | 2  |
| 79483  | conserved hypothetical protein-                          | 49 | 24 | 33 | 124 | 3  | 2  |
| 79528  | thioredoxin family protein-                              | 49 | 24 | 33 | 124 | 3  | 2  |
| 83749  | helix-turn-helix domain protein-                         | 49 | 24 | 33 | 124 | 3  | 2  |
| 99255  | phage lysozyme family protein-                           | 49 | 24 | 33 | 124 | 3  | 2  |
| 696839 | bacterial regulatory, tetR family protein-               | 15 | 58 | 79 | 81  | 46 | 36 |
| 132697 | sugar (and other) transporter family protein-            | 27 | 46 | 63 | 101 | 26 | 20 |
| 389597 | galactarate dehydratase-                                 | 27 | 46 | 63 | 101 | 26 | 20 |
| 389601 | aldehyde dehydrogenase family protein-                   | 27 | 46 | 63 | 101 | 26 | 20 |
| 389619 | FAD dependent oxidoreductase family protein-             | 27 | 46 | 63 | 101 | 26 | 20 |
| 557106 | 5-dehydro-4-deoxyglucuronate dehydratase-                | 27 | 46 | 63 | 101 | 26 | 20 |
| 589505 | glucuronate dehydratase-                                 | 27 | 46 | 63 | 101 | 26 | 20 |
| 685475 | outer membrane porin, OprD family protein-               | 27 | 46 | 63 | 101 | 26 | 20 |
| 685491 | FCD domain protein-                                      | 27 | 46 | 63 | 101 | 26 | 20 |
| 688197 | arginine N-succinyltransferase-                          | 27 | 46 | 63 | 101 | 26 | 20 |
| 597260 | type VI secretion system Rhs element Vgr family protein- | 55 | 18 | 25 | 127 | 0  | 0  |
| 788495 | conserved hypothetical protein-                          | 55 | 18 | 25 | 127 | 0  | 0  |
| 565569 | conserved hypothetical protein-                          | 51 | 22 | 30 | 125 | 2  | 2  |
| 780566 | conserved hypothetical protein-                          | 51 | 22 | 30 | 125 | 2  | 2  |
| 475202 | phage minor tail family protein-                         | 48 | 25 | 34 | 123 | 4  | 3  |
| 475586 | phage minor tail family protein-                         | 48 | 25 | 34 | 123 | 4  | 3  |
| 660374 | conserved hypothetical protein-                          | 48 | 25 | 34 | 123 | 4  | 3  |
| 791457 | phage minor tail family protein-                         | 48 | 25 | 34 | 123 | 4  | 3  |
| 182921 | KR domain protein-                                       | 53 | 20 | 27 | 126 | 1  | 1  |
| 182922 | KR domain protein-                                       | 53 | 20 | 27 | 126 | 1  | 1  |
| 481907 | conserved hypothetical protein-                          | 53 | 20 | 27 | 126 | 1  | 1  |
| 645253 | conserved hypothetical protein-                          | 53 | 20 | 27 | 126 | 1  | 1  |
| 646916 | zinc-binding dehydrogenase family protein-               | 53 | 20 | 27 | 126 | 1  | 1  |
| 791178 | conserved hypothetical protein-                          | 53 | 20 | 27 | 126 | 1  | 1  |
| 791179 | conserved hypothetical protein-                          | 53 | 20 | 27 | 126 | 1  | 1  |
| 801954 | conserved hypothetical protein-                          | 53 | 20 | 27 | 126 | 1  | 1  |
| 104187 | conserved hypothetical protein-                          | 31 | 42 | 58 | 106 | 21 | 17 |
| 336516 | spore Coat Protein U domain protein-                     | 42 | 41 | 42 | 118 | 9  | 7  |
| 557131 | conserved hypothetical protein-                          | 24 | 49 | 67 | 96  | 31 | 24 |
| 626556 | FCD domain protein-                                      | 24 | 49 | 67 | 96  | 31 | 24 |
| 100403 | phage minor tail family protein-                         | 50 | 23 | 32 | 124 | 3  | 2  |
| 141546 | conserved hypothetical protein-                          | 50 | 23 | 32 | 124 | 3  | 2  |
| 185846 | conserved hypothetical protein-                          | 50 | 23 | 32 | 124 | 3  | 2  |
| 235678 | conserved hypothetical protein-                          | 50 | 23 | 32 | 124 | 3  | 2  |
| 240816 | AAA domain family protein-                               | 50 | 23 | 32 | 124 | 3  | 2  |
| 263941 | cobalamin biosynthesis CobT VWa domain protein-          | 50 | 23 | 32 | 124 | 3  | 2  |
| 345219 | conserved hypothetical protein-                          | 50 | 23 | 32 | 124 | 3  | 2  |
| 345227 | conserved hypothetical protein-                          | 50 | 23 | 32 | 124 | 3  | 2  |
| 345259 | conserved hypothetical protein-                          | 50 | 23 | 32 | 124 | 3  | 2  |
| 359705 | conserved hypothetical protein-                          | 50 | 23 | 32 | 124 | 3  | 2  |

|        |                                                                         |    |    |    |     |    |    |
|--------|-------------------------------------------------------------------------|----|----|----|-----|----|----|
| 359744 | conserved hypothetical protein-                                         | 50 | 23 | 32 | 124 | 3  | 2  |
| 359750 | phage terminase large subunit-                                          | 50 | 23 | 32 | 124 | 3  | 2  |
| 359767 | conserved hypothetical protein-                                         | 50 | 23 | 32 | 124 | 3  | 2  |
| 392634 | conserved hypothetical protein-                                         | 50 | 23 | 32 | 124 | 3  | 2  |
| 392642 | conserved hypothetical protein-                                         | 50 | 23 | 32 | 124 | 3  | 2  |
| 43999  | conserved hypothetical protein-                                         | 50 | 23 | 32 | 124 | 3  | 2  |
| 455191 | conserved hypothetical protein-                                         | 50 | 23 | 32 | 124 | 3  | 2  |
| 455211 | conserved hypothetical protein-                                         | 50 | 23 | 32 | 124 | 3  | 2  |
| 455229 | conserved hypothetical protein-                                         | 50 | 23 | 32 | 124 | 3  | 2  |
| 542243 | conserved hypothetical protein-                                         | 50 | 23 | 32 | 124 | 3  | 2  |
| 565434 | conserved hypothetical protein-                                         | 50 | 23 | 32 | 124 | 3  | 2  |
| 565476 | conserved hypothetical protein-                                         | 50 | 23 | 32 | 124 | 3  | 2  |
| 646534 | conserved hypothetical protein-                                         | 50 | 23 | 32 | 124 | 3  | 2  |
| 646551 | conserved hypothetical protein-                                         | 50 | 23 | 32 | 124 | 3  | 2  |
| 696478 | conserved hypothetical protein-                                         | 50 | 23 | 32 | 124 | 3  | 2  |
| 696481 | exonuclease, DNA polymerase III, epsilon subunit family domain protein- | 50 | 23 | 32 | 124 | 3  | 2  |
| 712704 | conserved hypothetical protein-                                         | 50 | 23 | 32 | 124 | 3  | 2  |
| 728994 | phage minor tail protein L-                                             | 50 | 23 | 32 | 124 | 3  | 2  |
| 780766 | putative phage tail protein-                                            | 50 | 23 | 32 | 124 | 3  | 2  |
| 83037  | conserved hypothetical protein-                                         | 50 | 23 | 32 | 124 | 3  | 2  |
| 164836 | sugar (and other) transporter family protein-                           | 28 | 45 | 62 | 101 | 26 | 20 |
| 240783 | rhs element Vgr family protein-                                         | 56 | 17 | 23 | 127 | 0  | 0  |
| 3418   | conserved hypothetical protein-                                         | 56 | 17 | 23 | 127 | 0  | 0  |
| 595328 | sel1 repeat family protein-                                             | 56 | 17 | 23 | 127 | 0  | 0  |
| 481148 | metallo-peptidase M12B Reprolysin-like family protein-                  | 52 | 21 | 29 | 125 | 2  | 2  |
| 255320 | glycosyl transferase 2 family protein-                                  | 49 | 24 | 33 | 123 | 4  | 3  |
| 698793 | glycosyl transferase 2 family protein-                                  | 49 | 24 | 33 | 123 | 4  | 3  |
| 788091 | glycosyl transferase 2 family protein-                                  | 49 | 24 | 33 | 123 | 4  | 3  |
| 143965 | DJ-1/Pfpl family protein-                                               | 32 | 41 | 56 | 106 | 21 | 17 |
| 143969 | conserved hypothetical protein-                                         | 32 | 41 | 56 | 106 | 21 | 17 |
| 214173 | gram-negative pili assembly chaperone, N-terminal domain protein-       | 32 | 41 | 56 | 106 | 21 | 17 |
| 239046 | conserved hypothetical protein-                                         | 32 | 41 | 56 | 106 | 21 | 17 |
| 252203 | DJ-1/Pfpl family protein-                                               | 32 | 41 | 56 | 106 | 21 | 17 |
| 156105 | doxX family protein-                                                    | 42 | 31 | 42 | 117 | 10 | 8  |
| 35213  | bacterial regulatory, tetR family protein-                              | 42 | 31 | 42 | 117 | 10 | 8  |
| 748933 | O-antigen ligase like membrane family protein-                          | 38 | 35 | 48 | 113 | 14 | 11 |
| 470943 | acyltransferase family protein-                                         | 54 | 19 | 26 | 126 | 1  | 1  |
| 483049 | helix-turn-helix domain protein-                                        | 54 | 19 | 26 | 126 | 1  | 1  |
| 595844 | metal-binding domain of MaoC dehydratase family protein-                | 54 | 19 | 26 | 126 | 1  | 1  |
| 337131 | arginine N-succinyltransferase beta subunit-                            | 25 | 48 | 66 | 96  | 31 | 24 |
| 667471 | putative glucarate transporter-                                         | 29 | 44 | 60 | 101 | 26 | 20 |
| 788509 | conserved hypothetical protein-                                         | 29 | 44 | 60 | 101 | 26 | 20 |
| 218850 | conserved hypothetical protein-                                         | 51 | 22 | 30 | 124 | 3  | 2  |
| 263969 | nlpC/P60 family protein-                                                | 51 | 22 | 30 | 124 | 3  | 2  |
| 396578 | hypothetical protein-                                                   | 51 | 22 | 30 | 124 | 3  | 2  |
| 43994  | phage capsid family protein-                                            | 51 | 22 | 30 | 124 | 3  | 2  |
| 454998 | conserved hypothetical protein-                                         | 51 | 22 | 30 | 124 | 3  | 2  |
| 82923  | putative prophage LambdaSo, tail length tape measure protein-           | 51 | 22 | 30 | 124 | 3  | 2  |
| 83997  | glycosyltransferase Family 4 family protein-                            | 51 | 22 | 30 | 124 | 3  | 2  |
| 346219 | conserved hypothetical protein-                                         | 23 | 50 | 68 | 92  | 35 | 28 |
| 205293 | papC C-terminal domain protein-                                         | 33 | 40 | 55 | 106 | 21 | 17 |
| 214174 | spore Coat Protein U domain protein-                                    | 33 | 40 | 55 | 106 | 21 | 17 |
| 469039 | papC C-terminal domain protein-                                         | 33 | 40 | 55 | 106 | 21 | 17 |
| 483989 | spore Coat Protein U domain protein-                                    | 33 | 40 | 55 | 106 | 21 | 17 |
| 666612 | miro-like family protein-                                               | 37 | 36 | 49 | 111 | 16 | 13 |
| 102452 | curli production assembly/transport component CsgG family protein-      | 57 | 16 | 22 | 127 | 0  | 0  |
| 713232 | putative lipoprotein-                                                   | 57 | 16 | 22 | 127 | 0  | 0  |
| 713233 | putative lipoprotein NMB1124/NMB1162-                                   | 57 | 16 | 22 | 127 | 0  | 0  |
| 400222 | conserved hypothetical protein-                                         | 53 | 20 | 27 | 125 | 2  | 2  |
| 354276 | peptidase S24-like family protein-                                      | 50 | 23 | 32 | 123 | 4  | 3  |
| 674280 | transposase family protein-                                             | 50 | 23 | 32 | 123 | 4  | 3  |
| 47489  | malonate transporter, MadL subunit-                                     | 55 | 18 | 25 | 126 | 1  | 1  |
| 645315 | bacterial regulatory, tetR family protein-                              | 55 | 18 | 25 | 126 | 1  | 1  |
| 717788 | integrase core domain protein-                                          | 55 | 18 | 25 | 126 | 1  | 1  |
| 780755 | conserved hypothetical protein-                                         | 55 | 18 | 25 | 126 | 1  | 1  |
| 800832 | HPP family protein-                                                     | 55 | 18 | 25 | 126 | 1  | 1  |
| 661537 | conserved hypothetical protein-                                         | 12 | 61 | 84 | 70  | 57 | 45 |
| 218847 | conserved hypothetical protein-                                         | 52 | 21 | 29 | 124 | 3  | 2  |
| 235724 | conserved hypothetical protein-                                         | 52 | 21 | 29 | 124 | 3  | 2  |
| 240842 | ATPase associated with various cellular activities family protein-      | 52 | 21 | 29 | 124 | 3  | 2  |
| 240850 | conserved hypothetical protein-                                         | 52 | 21 | 29 | 124 | 3  | 2  |
| 255270 | ribonucleotide reductase, small chain family protein-                   | 52 | 21 | 29 | 124 | 3  | 2  |
| 359682 | mazG nucleotide pyrophosphohydrolase domain protein-                    | 52 | 21 | 29 | 124 | 3  | 2  |
| 542196 | mazG nucleotide pyrophosphohydrolase domain protein-                    | 52 | 21 | 29 | 124 | 3  | 2  |
| 646582 | conserved hypothetical protein-                                         | 52 | 21 | 29 | 124 | 3  | 2  |
| 787868 | hypothetical protein-                                                   | 43 | 30 | 41 | 117 | 10 | 8  |
| 462004 | amino acid permease family protein-                                     | 30 | 43 | 59 | 101 | 26 | 20 |
| 521865 | conserved hypothetical protein-                                         | 51 | 22 | 30 | 123 | 4  | 3  |
| 165191 | conserved hypothetical protein-                                         | 46 | 27 | 37 | 119 | 8  | 6  |
| 516412 | conserved hypothetical protein-                                         | 58 | 15 | 21 | 127 | 0  | 0  |
| 581735 | conserved hypothetical protein-                                         | 58 | 15 | 21 | 127 | 0  | 0  |
| 13779  | endoribonuclease L-PSP family protein-                                  | 43 | 30 | 41 | 116 | 11 | 9  |
| 143238 | peptidase M13 family protein-                                           | 43 | 30 | 41 | 116 | 11 | 9  |
| 337448 | bacterial regulatory, tetR family protein-                              | 43 | 30 | 41 | 116 | 11 | 9  |
| 240267 | conserved hypothetical protein-                                         | 56 | 17 | 23 | 126 | 1  | 1  |
| 474878 | conserved hypothetical protein-                                         | 56 | 17 | 23 | 126 | 1  | 1  |
| 646915 | glutathione S-transferase, N-terminal domain protein-                   | 56 | 17 | 23 | 126 | 1  | 1  |
| 141506 | conserved hypothetical protein-                                         | 53 | 20 | 27 | 124 | 3  | 2  |
| 235634 | uracil DNA glycosylase superfamily protein-                             | 53 | 20 | 27 | 124 | 3  | 2  |
| 240824 | 5'-3' exonuclease, C-terminal SAM fold family protein-                  | 53 | 20 | 27 | 124 | 3  | 2  |
| 255271 | ribonucleoside-diphosphate reductase, alpha subunit-                    | 53 | 20 | 27 | 124 | 3  | 2  |
| 396883 | conserved hypothetical protein-                                         | 53 | 20 | 27 | 124 | 3  | 2  |
| 399772 | putative thymidylate synthase ThyX-                                     | 53 | 20 | 27 | 124 | 3  | 2  |
| 399773 | conserved hypothetical protein-                                         | 53 | 20 | 27 | 124 | 3  | 2  |
| 44057  | ribonucleotide reductase, small chain family protein-                   | 53 | 20 | 27 | 124 | 3  | 2  |



|        |                                                                       |    |    |    |     |    |    |
|--------|-----------------------------------------------------------------------|----|----|----|-----|----|----|
| 455167 | conserved hypothetical protein-                                       | 53 | 20 | 27 | 124 | 3  | 2  |
| 455180 | conserved hypothetical protein-                                       | 53 | 20 | 27 | 124 | 3  | 2  |
| 489382 | recF/RecN/SMC N terminal domain protein-                              | 53 | 20 | 27 | 124 | 3  | 2  |
| 489418 | conserved hypothetical protein-                                       | 53 | 20 | 27 | 124 | 3  | 2  |
| 542203 | conserved hypothetical protein-                                       | 53 | 20 | 27 | 124 | 3  | 2  |
| 542204 | conserved hypothetical protein-                                       | 53 | 20 | 27 | 124 | 3  | 2  |
| 542208 | calcineurin-like phosphoesterase superfamily domain protein-          | 53 | 20 | 27 | 124 | 3  | 2  |
| 713016 | conserved hypothetical protein-                                       | 53 | 20 | 27 | 124 | 3  | 2  |
| 83108  | conserved hypothetical protein-                                       | 53 | 20 | 27 | 124 | 3  | 2  |
| 83767  | conserved hypothetical protein-                                       | 53 | 20 | 27 | 124 | 3  | 2  |
| 418755 | phage minor tail family protein-                                      | 52 | 21 | 29 | 123 | 4  | 3  |
| 644836 | phage minor tail family protein-                                      | 52 | 21 | 29 | 123 | 4  | 3  |
| 800170 | conserved hypothetical protein-                                       | 52 | 21 | 29 | 123 | 4  | 3  |
| 801171 | conserved hypothetical protein-                                       | 52 | 21 | 29 | 123 | 4  | 3  |
| 240875 | conserved hypothetical protein-                                       | 55 | 18 | 25 | 125 | 2  | 2  |
| 337431 | HTH-like domain protein-                                              | 55 | 18 | 25 | 125 | 2  | 2  |
| 205294 | spore Coat Protein U domain protein-                                  | 35 | 38 | 52 | 106 | 21 | 17 |
| 185117 | conserved hypothetical protein-                                       | 59 | 14 | 19 | 127 | 0  | 0  |
| 185137 | phage integrase family protein-                                       | 59 | 14 | 19 | 127 | 0  | 0  |
| 250282 | conserved hypothetical protein-                                       | 59 | 14 | 19 | 127 | 0  | 0  |
| 251003 | conserved hypothetical protein-                                       | 59 | 14 | 19 | 127 | 0  | 0  |
| 251327 | helix-turn-helix domain protein-                                      | 59 | 14 | 19 | 127 | 0  | 0  |
| 263231 | phage integrase family protein-                                       | 59 | 14 | 19 | 127 | 0  | 0  |
| 359582 | conserved hypothetical protein-                                       | 59 | 14 | 19 | 127 | 0  | 0  |
| 359595 | phage integrase family protein-                                       | 59 | 14 | 19 | 127 | 0  | 0  |
| 440778 | conserved hypothetical protein-                                       | 59 | 14 | 19 | 127 | 0  | 0  |
| 802051 | conserved hypothetical protein-                                       | 59 | 14 | 19 | 127 | 0  | 0  |
| 392482 | ATP-dependent RNA helicase domain protein-                            | 25 | 48 | 66 | 91  | 36 | 28 |
| 29505  | type I phosphodiesterase / nucleotide pyrophosphatase family protein- | 45 | 28 | 38 | 117 | 10 | 8  |
| 697611 | outer membrane porin, OprD family protein-                            | 45 | 28 | 38 | 117 | 10 | 8  |
| 790153 | formylglycine-generating sulfatase enzyme family protein-             | 45 | 28 | 38 | 117 | 10 | 8  |
| 106166 | dTDP-glucose 4,6-dehydratase-                                         | 57 | 16 | 22 | 126 | 1  | 1  |
| 164339 | dTDP-glucose 4,6-dehydratase-                                         | 57 | 16 | 22 | 126 | 1  | 1  |
| 240200 | dTDP-glucose 4,6-dehydratase-                                         | 57 | 16 | 22 | 126 | 1  | 1  |
| 254816 | conserved hypothetical protein-                                       | 57 | 16 | 22 | 126 | 1  | 1  |
| 46190  | alcohol dehydrogenase superfamily, zinc-containing-                   | 57 | 16 | 22 | 126 | 1  | 1  |
| 515387 | inhibitor of g-type lysozyme-                                         | 57 | 16 | 22 | 126 | 1  | 1  |
| 566189 | zinc-binding dehydrogenase family protein-                            | 57 | 16 | 22 | 126 | 1  | 1  |
| 629007 | NAD dependent epimerase/dehydratase family protein-                   | 57 | 16 | 22 | 126 | 1  | 1  |
| 335053 | nucleotide sugar dehydrogenase family protein-                        | 17 | 56 | 77 | 76  | 51 | 40 |
| 581489 | nucleotide sugar dehydrogenase family protein-                        | 17 | 56 | 77 | 76  | 51 | 40 |
| 598811 | nucleotide sugar dehydrogenase family protein-                        | 17 | 56 | 77 | 76  | 51 | 40 |
| 630567 | nucleotide sugar dehydrogenase family protein-                        | 17 | 56 | 77 | 76  | 51 | 40 |
| 278597 | conserved hypothetical protein-                                       | 54 | 19 | 26 | 124 | 3  | 2  |
| 392712 | intein C-terminal splicing region domain protein-                     | 54 | 19 | 26 | 124 | 3  | 2  |
| 31218  | acetyltransferase family protein-                                     | 45 | 28 | 38 | 116 | 11 | 9  |
| 338968 | acetyltransferase family protein-                                     | 45 | 28 | 38 | 116 | 11 | 9  |
| 199881 | conserved hypothetical protein-                                       | 53 | 20 | 27 | 123 | 4  | 3  |
| 711376 | conserved hypothetical protein-                                       | 53 | 20 | 27 | 123 | 4  | 3  |
| 791471 | conserved hypothetical protein-                                       | 53 | 20 | 27 | 123 | 4  | 3  |
| 163968 | filamentous hemagglutinin family N-terminal domain protein-           | 56 | 17 | 23 | 125 | 2  | 2  |
| 336278 | helix-turn-helix domain protein-                                      | 56 | 17 | 23 | 125 | 2  | 2  |
| 482345 | DDE domain protein-                                                   | 56 | 17 | 23 | 125 | 2  | 2  |
| 140775 | prophage CP4-57 regulatory family protein-                            | 60 | 13 | 18 | 127 | 0  | 0  |
| 254666 | conserved hypothetical protein-                                       | 60 | 13 | 18 | 127 | 0  | 0  |
| 306307 | conserved hypothetical protein-                                       | 60 | 13 | 18 | 127 | 0  | 0  |
| 629686 | putative outer membrane protein-                                      | 60 | 13 | 18 | 127 | 0  | 0  |
| 215352 | lysR substrate binding domain protein-                                | 33 | 40 | 55 | 101 | 26 | 20 |
| 164334 | glycosyl transferases group 1 family protein-                         | 58 | 15 | 21 | 126 | 1  | 1  |
| 241151 | glycosyl transferase 2 family protein-                                | 58 | 15 | 21 | 126 | 1  | 1  |
| 334101 | glycosyl transferase 2 family protein-                                | 58 | 15 | 21 | 126 | 1  | 1  |
| 334106 | mitochondrial fission ELM1 family protein-                            | 58 | 15 | 21 | 126 | 1  | 1  |
| 359361 | mitochondrial fission ELM1 family protein-                            | 58 | 15 | 21 | 126 | 1  | 1  |
| 629002 | glycosyl transferase 2 family protein-                                | 58 | 15 | 21 | 126 | 1  | 1  |
| 629616 | virulence protein STM3117-                                            | 58 | 15 | 21 | 126 | 1  | 1  |
| 211120 | putative upf86.8-                                                     | 55 | 18 | 25 | 124 | 3  | 2  |
| 211122 | conserved hypothetical protein-                                       | 55 | 18 | 25 | 124 | 3  | 2  |
| 455062 | putative upf86.8-                                                     | 55 | 18 | 25 | 124 | 3  | 2  |
| 646616 | conserved hypothetical protein-                                       | 55 | 18 | 25 | 124 | 3  | 2  |
| 712619 | conserved hypothetical protein-                                       | 55 | 18 | 25 | 124 | 3  | 2  |
| 657245 | MULE transposase domain protein-                                      | 44 | 29 | 40 | 114 | 13 | 10 |
| 551310 | vacuole effluxer Atg22 like family protein-                           | 47 | 26 | 36 | 117 | 10 | 8  |
| 782848 | HMGL-like family protein-                                             | 47 | 26 | 36 | 117 | 10 | 8  |
| 716954 | transposase, Mutator family protein-                                  | 43 | 30 | 41 | 113 | 14 | 11 |
| 151    | conserved hypothetical protein-                                       | 54 | 19 | 26 | 123 | 4  | 3  |
| 199882 | conserved hypothetical protein-                                       | 54 | 19 | 26 | 123 | 4  | 3  |
| 213392 | conserved hypothetical protein-                                       | 54 | 19 | 26 | 123 | 4  | 3  |
| 336520 | transposase DDE domain protein-                                       | 54 | 19 | 26 | 123 | 4  | 3  |
| 469019 | conserved hypothetical protein-                                       | 54 | 19 | 26 | 123 | 4  | 3  |
| 475595 | conserved hypothetical protein-                                       | 54 | 19 | 26 | 123 | 4  | 3  |
| 543513 | conserved hypothetical protein-                                       | 54 | 19 | 26 | 123 | 4  | 3  |
| 663769 | conserved hypothetical protein-                                       | 54 | 19 | 26 | 123 | 4  | 3  |
| 710227 | conserved hypothetical protein-                                       | 54 | 19 | 26 | 123 | 4  | 3  |
| 724742 | conserved hypothetical protein-                                       | 54 | 19 | 26 | 123 | 4  | 3  |
| 745855 | conserved hypothetical protein-                                       | 51 | 22 | 30 | 121 | 6  | 5  |
| 319997 | bacterial regulatory, tetR family protein-                            | 29 | 44 | 60 | 94  | 33 | 26 |
| 254207 | conserved hypothetical protein-                                       | 57 | 16 | 22 | 125 | 2  | 2  |
| 469083 | conserved hypothetical protein-                                       | 57 | 16 | 22 | 125 | 2  | 2  |
| 469289 | transposase family protein-                                           | 57 | 16 | 22 | 125 | 2  | 2  |
| 565502 | conserved hypothetical protein-                                       | 57 | 16 | 22 | 125 | 2  | 2  |
| 696411 | conserved hypothetical protein-                                       | 57 | 16 | 22 | 125 | 2  | 2  |
| 711136 | conserved hypothetical protein-                                       | 48 | 25 | 34 | 118 | 9  | 7  |
| 121178 | putative darcynin 2-                                                  | 38 | 35 | 48 | 107 | 20 | 16 |
| 356339 | copper-resistance , CopA family protein-                              | 41 | 32 | 44 | 110 | 17 | 13 |
| 318534 | heavy-metal-associated domain protein-                                | 46 | 27 | 37 | 116 | 11 | 9  |

|        |                                                                        |    |    |    |     |    |    |
|--------|------------------------------------------------------------------------|----|----|----|-----|----|----|
| 183351 | conserved hypothetical protein-                                        | 61 | 12 | 16 | 127 | 0  | 0  |
| 1941   | conserved hypothetical protein-                                        | 61 | 12 | 16 | 127 | 0  | 0  |
| 198593 | conserved hypothetical protein-                                        | 61 | 12 | 16 | 127 | 0  | 0  |
| 240075 | lysR substrate binding domain protein-                                 | 61 | 12 | 16 | 127 | 0  | 0  |
| 2535   | conserved hypothetical protein-                                        | 61 | 12 | 16 | 127 | 0  | 0  |
| 313469 | PAAR motif family protein-                                             | 61 | 12 | 16 | 127 | 0  | 0  |
| 347335 | pilus subunit FilA domain protein-                                     | 61 | 12 | 16 | 127 | 0  | 0  |
| 358223 | L(+)-tartrate dehydratase subunit beta-                                | 61 | 12 | 16 | 127 | 0  | 0  |
| 441712 | vacuole effluxer Atg22 like family protein-                            | 61 | 12 | 16 | 127 | 0  | 0  |
| 472599 | conserved hypothetical protein-                                        | 61 | 12 | 16 | 127 | 0  | 0  |
| 543324 | PAAR motif family protein-                                             | 61 | 12 | 16 | 127 | 0  | 0  |
| 629710 | conserved hypothetical protein-                                        | 61 | 12 | 16 | 127 | 0  | 0  |
| 718151 | hydrolyase, tartrate alpha subunit/fumarate, Fe-S type domain protein- | 61 | 12 | 16 | 127 | 0  | 0  |
| 720052 | conserved hypothetical protein-                                        | 61 | 12 | 16 | 127 | 0  | 0  |
| 725155 | conserved hypothetical protein-                                        | 61 | 12 | 16 | 127 | 0  | 0  |
| 729518 | conserved hypothetical protein-                                        | 61 | 12 | 16 | 127 | 0  | 0  |
| 730454 | conserved hypothetical protein-                                        | 61 | 12 | 16 | 127 | 0  | 0  |
| 788238 | conserved hypothetical protein-                                        | 61 | 12 | 16 | 127 | 0  | 0  |
| 200433 | conserved hypothetical protein-                                        | 59 | 14 | 19 | 126 | 1  | 1  |
| 338220 | phage minor tail protein L-                                            | 59 | 14 | 19 | 126 | 1  | 1  |
| 44081  | type-1 restriction enzyme R protein-                                   | 59 | 14 | 19 | 126 | 1  | 1  |
| 455478 | putative transcriptional regulator-                                    | 59 | 14 | 19 | 126 | 1  | 1  |
| 471052 | putative transcriptional regulator-                                    | 59 | 14 | 19 | 126 | 1  | 1  |
| 475198 | bacteriophage lambda tail assembly I family protein-                   | 59 | 14 | 19 | 126 | 1  | 1  |
| 475584 | phage minor tail protein L-                                            | 59 | 14 | 19 | 126 | 1  | 1  |
| 747554 | phage minor tail protein L-                                            | 59 | 14 | 19 | 126 | 1  | 1  |
| 779657 | type I restriction-modification system, M subunit-                     | 59 | 14 | 19 | 126 | 1  | 1  |
| 109702 | tonB-dependent siderophore receptor family protein-                    | 35 | 38 | 52 | 102 | 25 | 20 |
| 215351 | chrR Cupin-like domain protein-                                        | 34 | 39 | 53 | 101 | 26 | 20 |
| 336601 | phage integrase family protein-                                        | 56 | 17 | 23 | 124 | 3  | 2  |
| 344683 | putative membrane protein-                                             | 56 | 17 | 23 | 124 | 3  | 2  |
| 409869 | bacterial regulatory, tetR family protein-                             | 56 | 17 | 23 | 124 | 3  | 2  |
| 44040  | intein C-terminal splicing region domain protein-                      | 56 | 17 | 23 | 124 | 3  | 2  |
| 489344 | conserved hypothetical protein-                                        | 56 | 17 | 23 | 124 | 3  | 2  |
| 542210 | conserved hypothetical protein-                                        | 56 | 17 | 23 | 124 | 3  | 2  |
| 779934 | conserved hypothetical protein-                                        | 56 | 17 | 23 | 124 | 3  | 2  |
| 781633 | conserved hypothetical protein-                                        | 56 | 17 | 23 | 124 | 3  | 2  |
| 82930  | conserved hypothetical protein-                                        | 56 | 17 | 23 | 124 | 3  | 2  |
| 107602 | conserved hypothetical protein-                                        | 22 | 51 | 70 | 82  | 45 | 35 |
| 99145  | conserved hypothetical protein-                                        | 22 | 51 | 70 | 82  | 45 | 35 |
| 581766 | lysR substrate binding domain protein-                                 | 48 | 25 | 34 | 117 | 10 | 8  |
| 629435 | coA-transferase III family protein-                                    | 48 | 25 | 34 | 117 | 10 | 8  |
| 185563 | bacterial regulatory, tetR family protein-                             | 29 | 44 | 60 | 93  | 34 | 27 |
| 14188  | copper-resistance , CopA family protein-                               | 39 | 34 | 47 | 107 | 20 | 16 |
| 2629   | copper resistance D family protein-                                    | 37 | 36 | 49 | 104 | 23 | 18 |
| 302562 | copper resistance D family protein-                                    | 37 | 36 | 49 | 104 | 23 | 18 |
| 471764 | copper resistance D family protein-                                    | 37 | 36 | 49 | 104 | 23 | 18 |
| 630960 | copper resistance D family protein-                                    | 37 | 36 | 49 | 104 | 23 | 18 |
| 351105 | glycosyl transferase 1 family protein-                                 | 55 | 18 | 25 | 123 | 4  | 3  |
| 409899 | acetyltransferase domain protein-                                      | 55 | 18 | 25 | 123 | 4  | 3  |
| 42217  | bacterial sugar transferase family protein-                            | 27 | 46 | 63 | 89  | 38 | 30 |
| 788090 | bacterial sugar transferase family protein-                            | 27 | 46 | 63 | 89  | 38 | 30 |
| 341412 | conserved hypothetical protein-                                        | 23 | 50 | 68 | 82  | 45 | 35 |
| 80562  | conserved hypothetical protein-                                        | 23 | 50 | 68 | 82  | 45 | 35 |
| 102316 | conserved hypothetical protein-                                        | 62 | 11 | 15 | 127 | 0  | 0  |
| 102317 | pre-toxin domain with VENN motif family protein-                       | 62 | 11 | 15 | 127 | 0  | 0  |
| 105242 | HTH-like domain protein-                                               | 62 | 11 | 15 | 127 | 0  | 0  |
| 106444 | integrase domain protein-                                              | 62 | 11 | 15 | 127 | 0  | 0  |
| 139362 | conserved hypothetical protein-                                        | 62 | 11 | 15 | 127 | 0  | 0  |
| 166893 | major Facilitator Superfamily protein-                                 | 62 | 11 | 15 | 127 | 0  | 0  |
| 22726  | conserved hypothetical protein-                                        | 62 | 11 | 15 | 127 | 0  | 0  |
| 251438 | putative methionine aminopeptidase-                                    | 62 | 11 | 15 | 127 | 0  | 0  |
| 316762 | conserved hypothetical protein-                                        | 62 | 11 | 15 | 127 | 0  | 0  |
| 320277 | transposase family protein-                                            | 62 | 11 | 15 | 127 | 0  | 0  |
| 3383   | conserved hypothetical protein-                                        | 62 | 11 | 15 | 127 | 0  | 0  |
| 356250 | conserved hypothetical protein-                                        | 62 | 11 | 15 | 127 | 0  | 0  |
| 397737 | prokaryotic E2 B family protein-                                       | 62 | 11 | 15 | 127 | 0  | 0  |
| 455336 | transposase family protein-                                            | 62 | 11 | 15 | 127 | 0  | 0  |
| 472126 | phage integrase family protein-                                        | 62 | 11 | 15 | 127 | 0  | 0  |
| 473666 | conserved hypothetical protein-                                        | 62 | 11 | 15 | 127 | 0  | 0  |
| 474137 | putative methionine aminopeptidase-                                    | 62 | 11 | 15 | 127 | 0  | 0  |
| 500453 | conserved hypothetical protein-                                        | 62 | 11 | 15 | 127 | 0  | 0  |
| 515887 | conserved hypothetical protein-                                        | 62 | 11 | 15 | 127 | 0  | 0  |
| 566640 | pilus assembly FilF domain protein-                                    | 62 | 11 | 15 | 127 | 0  | 0  |
| 567955 | conserved hypothetical protein-                                        | 62 | 11 | 15 | 127 | 0  | 0  |
| 714714 | conserved hypothetical protein-                                        | 62 | 11 | 15 | 127 | 0  | 0  |
| 718443 | conserved hypothetical protein-                                        | 62 | 11 | 15 | 127 | 0  | 0  |
| 718475 | beta-lactamase family protein-                                         | 62 | 11 | 15 | 127 | 0  | 0  |
| 729524 | haemagglutinin repeat family protein-                                  | 62 | 11 | 15 | 127 | 0  | 0  |
| 787713 | conserved hypothetical protein-                                        | 62 | 11 | 15 | 127 | 0  | 0  |
| 98948  | phage integrase family protein-                                        | 62 | 11 | 15 | 127 | 0  | 0  |
| 98949  | conserved hypothetical protein-                                        | 62 | 11 | 15 | 127 | 0  | 0  |
| 103559 | putative phage-type endonuclease domain protein-                       | 60 | 13 | 18 | 126 | 1  | 1  |
| 106167 | dTDP-4-dehydrorhamnose reductase-                                      | 60 | 13 | 18 | 126 | 1  | 1  |
| 106168 | glucose-1-phosphate thymidyltransferase-                               | 60 | 13 | 18 | 126 | 1  | 1  |
| 106169 | dTDP-4-dehydrorhamnose 3,5-epimerase-                                  | 60 | 13 | 18 | 126 | 1  | 1  |
| 164336 | dTDP-4-dehydrorhamnose 3,5-epimerase-                                  | 60 | 13 | 18 | 126 | 1  | 1  |
| 164338 | dTDP-4-dehydrorhamnose reductase-                                      | 60 | 13 | 18 | 126 | 1  | 1  |
| 200489 | phage minor tail protein L-                                            | 60 | 13 | 18 | 126 | 1  | 1  |
| 256050 | putative phage-type endonuclease domain protein-                       | 60 | 13 | 18 | 126 | 1  | 1  |
| 320107 | putative phage-type endonuclease domain protein-                       | 60 | 13 | 18 | 126 | 1  | 1  |
| 359057 | putative phage-type endonuclease domain protein-                       | 60 | 13 | 18 | 126 | 1  | 1  |
| 474877 | putative phage-type endonuclease domain protein-                       | 60 | 13 | 18 | 126 | 1  | 1  |
| 483981 | phage minor tail protein L-                                            | 60 | 13 | 18 | 126 | 1  | 1  |
| 582996 | acetyltransferase family protein-                                      | 60 | 13 | 18 | 126 | 1  | 1  |

|        |                                                                                  |    |    |    |     |    |    |
|--------|----------------------------------------------------------------------------------|----|----|----|-----|----|----|
| 629003 | nucleotidyl transferase family protein-                                          | 60 | 13 | 18 | 126 | 1  | 1  |
| 630955 | conserved hypothetical protein-                                                  | 60 | 13 | 18 | 126 | 1  | 1  |
| 646936 | putative phage-type endonuclease domain protein-                                 | 60 | 13 | 18 | 126 | 1  | 1  |
| 698003 | glucose-1-phosphate thymidyltransferase-                                         | 60 | 13 | 18 | 126 | 1  | 1  |
| 732221 | conserved hypothetical protein-                                                  | 60 | 13 | 18 | 126 | 1  | 1  |
| 780037 | conserved hypothetical protein-                                                  | 60 | 13 | 18 | 126 | 1  | 1  |
| 781747 | conserved hypothetical protein-                                                  | 60 | 13 | 18 | 126 | 1  | 1  |
| 791455 | phage minor tail protein L-                                                      | 60 | 13 | 18 | 126 | 1  | 1  |
| 800402 | conserved hypothetical protein-                                                  | 60 | 13 | 18 | 126 | 1  | 1  |
| 85685  | conserved hypothetical protein-                                                  | 60 | 13 | 18 | 126 | 1  | 1  |
| 183295 | conserved hypothetical protein-                                                  | 57 | 16 | 22 | 124 | 3  | 2  |
| 675532 | conserved hypothetical protein-                                                  | 57 | 16 | 22 | 124 | 3  | 2  |
| 716953 | MULE transposase domain protein-                                                 | 44 | 29 | 40 | 112 | 15 | 12 |
| 30942  | lysR substrate binding domain protein-                                           | 50 | 23 | 32 | 118 | 9  | 7  |
| 714136 | NADPH-dependent FMN reductase family protein-                                    | 50 | 23 | 32 | 118 | 9  | 7  |
| 165248 | conserved hypothetical protein-                                                  | 48 | 25 | 34 | 116 | 11 | 9  |
| 500333 | hydroxyisourate hydrolase-                                                       | 48 | 25 | 34 | 116 | 11 | 9  |
| 595734 | hydroxyisourate hydrolase-                                                       | 48 | 25 | 34 | 116 | 11 | 9  |
| 644118 | response regulator-                                                              | 48 | 25 | 34 | 116 | 11 | 9  |
| 521869 | conserved hypothetical protein-                                                  | 56 | 17 | 23 | 123 | 4  | 3  |
| 644840 | conserved hypothetical protein-                                                  | 56 | 17 | 23 | 123 | 4  | 3  |
| 344827 | bacterial regulatory, tetR family protein-                                       | 41 | 32 | 44 | 108 | 19 | 15 |
| 356334 | metallo-beta-lactamase superfamily protein-                                      | 59 | 14 | 19 | 125 | 2  | 2  |
| 356337 | hypothetical protein-                                                            | 59 | 14 | 19 | 125 | 2  | 2  |
| 388070 | phage minor tail protein L-                                                      | 46 | 27 | 37 | 113 | 14 | 11 |
| 404115 | bacteriophage lambda tail assembly I family protein-                             | 46 | 27 | 37 | 113 | 14 | 11 |
| 483984 | bacteriophage lambda tail assembly I family protein-                             | 46 | 27 | 37 | 113 | 14 | 11 |
| 747552 | bacteriophage lambda tail assembly I family protein-                             | 46 | 27 | 37 | 113 | 14 | 11 |
| 801010 | nlpC/P60 family protein-                                                         | 46 | 27 | 37 | 113 | 14 | 11 |
| 204817 | bacterial regulatory, tetR family protein-                                       | 41 | 32 | 44 | 107 | 20 | 16 |
| 461997 | arabinose-binding domain of AraC transcription regulator, N-term family protein- | 38 | 35 | 48 | 103 | 24 | 19 |
| 1700   | conserved hypothetical protein-                                                  | 54 | 19 | 26 | 121 | 6  | 5  |
| 278937 | conserved hypothetical protein-                                                  | 54 | 19 | 26 | 121 | 6  | 5  |
| 100565 | conserved hypothetical protein-                                                  | 61 | 12 | 16 | 126 | 1  | 1  |
| 320109 | conserved hypothetical protein-                                                  | 61 | 12 | 16 | 126 | 1  | 1  |
| 46728  | conserved hypothetical protein-                                                  | 61 | 12 | 16 | 126 | 1  | 1  |
| 471046 | conserved hypothetical protein-                                                  | 61 | 12 | 16 | 126 | 1  | 1  |
| 513470 | putative predicted protein-                                                      | 61 | 12 | 16 | 126 | 1  | 1  |
| 566185 | antibiotic biosynthesis monooxygenase family protein-                            | 61 | 12 | 16 | 126 | 1  | 1  |
| 566187 | NADH(P)-binding family protein-                                                  | 61 | 12 | 16 | 126 | 1  | 1  |
| 566188 | lysR substrate binding domain protein-                                           | 61 | 12 | 16 | 126 | 1  | 1  |
| 566462 | conserved hypothetical protein-                                                  | 61 | 12 | 16 | 126 | 1  | 1  |
| 596117 | DEAD/DEAH box helicase family protein-                                           | 61 | 12 | 16 | 126 | 1  | 1  |
| 645588 | putative predicted protein-                                                      | 61 | 12 | 16 | 126 | 1  | 1  |
| 646930 | zinc-binding alcohol dehydrogenase family protein-                               | 61 | 12 | 16 | 126 | 1  | 1  |
| 801008 | conserved hypothetical protein-                                                  | 61 | 12 | 16 | 126 | 1  | 1  |
| 102882 | DDE domain protein-                                                              | 63 | 10 | 14 | 127 | 0  | 0  |
| 164772 | conserved hypothetical protein-                                                  | 63 | 10 | 14 | 127 | 0  | 0  |
| 184523 | conserved hypothetical protein-                                                  | 63 | 10 | 14 | 127 | 0  | 0  |
| 250296 | conserved hypothetical protein-                                                  | 63 | 10 | 14 | 127 | 0  | 0  |
| 250297 | conserved hypothetical protein-                                                  | 63 | 10 | 14 | 127 | 0  | 0  |
| 334967 | conserved hypothetical protein-                                                  | 63 | 10 | 14 | 127 | 0  | 0  |
| 356957 | conserved hypothetical protein-                                                  | 63 | 10 | 14 | 127 | 0  | 0  |
| 397552 | conserved hypothetical protein-                                                  | 63 | 10 | 14 | 127 | 0  | 0  |
| 452339 | conserved hypothetical protein-                                                  | 63 | 10 | 14 | 127 | 0  | 0  |
| 472939 | putative integrase-                                                              | 63 | 10 | 14 | 127 | 0  | 0  |
| 583486 | putative integrase-                                                              | 63 | 10 | 14 | 127 | 0  | 0  |
| 599256 | conserved hypothetical protein-                                                  | 63 | 10 | 14 | 127 | 0  | 0  |
| 629584 | conserved hypothetical protein-                                                  | 63 | 10 | 14 | 127 | 0  | 0  |
| 713469 | acetyltransferase family protein-                                                | 63 | 10 | 14 | 127 | 0  | 0  |
| 713470 | glycosyl transferase 1 family protein-                                           | 63 | 10 | 14 | 127 | 0  | 0  |
| 725126 | conserved hypothetical protein-                                                  | 63 | 10 | 14 | 127 | 0  | 0  |
| 725127 | conserved hypothetical protein-                                                  | 63 | 10 | 14 | 127 | 0  | 0  |
| 725128 | conserved hypothetical protein-                                                  | 63 | 10 | 14 | 127 | 0  | 0  |
| 729519 | conserved hypothetical protein-                                                  | 63 | 10 | 14 | 127 | 0  | 0  |
| 731317 | conserved hypothetical protein-                                                  | 63 | 10 | 14 | 127 | 0  | 0  |
| 799900 | integrase domain protein-                                                        | 63 | 10 | 14 | 127 | 0  | 0  |
| 256334 | conserved hypothetical protein-                                                  | 58 | 15 | 21 | 124 | 3  | 2  |
| 336600 | conserved hypothetical protein-                                                  | 58 | 15 | 21 | 124 | 3  | 2  |
| 380884 | conserved hypothetical protein-                                                  | 58 | 15 | 21 | 124 | 3  | 2  |
| 791474 | conserved hypothetical protein-                                                  | 58 | 15 | 21 | 124 | 3  | 2  |
| 157971 | NAD(P)-binding Rossmann-like domain protein-                                     | 49 | 24 | 33 | 116 | 11 | 9  |
| 165261 | conserved hypothetical protein-                                                  | 49 | 24 | 33 | 116 | 11 | 9  |
| 185410 | lipocalin / cytosolic fatty-acid binding family protein-                         | 49 | 24 | 33 | 116 | 11 | 9  |
| 199054 | conserved hypothetical protein-                                                  | 49 | 24 | 33 | 116 | 11 | 9  |
| 241532 | his Kinase A domain protein-                                                     | 49 | 24 | 33 | 116 | 11 | 9  |
| 32862  | methyltransferase domain protein-                                                | 49 | 24 | 33 | 116 | 11 | 9  |
| 468837 | fatty acid desaturase family protein-                                            | 49 | 24 | 33 | 116 | 11 | 9  |
| 482207 | conserved hypothetical protein-                                                  | 49 | 24 | 33 | 116 | 11 | 9  |
| 482212 | transcriptional regulatory , C terminal family protein-                          | 49 | 24 | 33 | 116 | 11 | 9  |
| 507065 | transcriptional regulatory , C terminal family protein-                          | 49 | 24 | 33 | 116 | 11 | 9  |
| 699156 | conserved hypothetical protein-                                                  | 49 | 24 | 33 | 116 | 11 | 9  |
| 760918 | methyltransferase domain protein-                                                | 49 | 24 | 33 | 116 | 11 | 9  |
| 760925 | heavy metal sensor kinase family protein-                                        | 49 | 24 | 33 | 116 | 11 | 9  |
| 805746 | sel1 repeat family protein-                                                      | 8  | 65 | 89 | 48  | 79 | 62 |
| 114127 | core-2/l-Branching enzyme family protein-                                        | 57 | 16 | 22 | 123 | 4  | 3  |
| 114130 | polysaccharide biosynthesis family protein-                                      | 57 | 16 | 22 | 123 | 4  | 3  |
| 237393 | capsule polysaccharide biosynthesis family protein-                              | 57 | 16 | 22 | 123 | 4  | 3  |
| 345770 | putative membrane protein-                                                       | 57 | 16 | 22 | 123 | 4  | 3  |
| 64107  | putative membrane protein-                                                       | 57 | 16 | 22 | 123 | 4  | 3  |
| 266446 | conserved hypothetical protein-                                                  | 25 | 48 | 66 | 82  | 45 | 35 |
| 643724 | conserved hypothetical protein-                                                  | 25 | 48 | 66 | 82  | 45 | 35 |
| 335504 | secretory lipase family protein-                                                 | 50 | 23 | 32 | 117 | 10 | 8  |
| 483361 | secretory lipase family protein-                                                 | 50 | 23 | 32 | 117 | 10 | 8  |
| 182746 | hypothetical protein-                                                            | 60 | 13 | 18 | 125 | 2  | 2  |

|        |                                                                   |    |    |    |     |     |    |
|--------|-------------------------------------------------------------------|----|----|----|-----|-----|----|
| 455186 | HNH endonuclease family protein-                                  | 60 | 13 | 18 | 125 | 2   | 2  |
| 104439 | stress-induced bacterial acidophilic repeat motif family protein- | 46 | 27 | 37 | 112 | 15  | 12 |
| 154506 | tonB dependent receptor family protein-                           | 46 | 27 | 37 | 112 | 15  | 12 |
| 158162 | stress-induced bacterial acidophilic repeat motif family protein- | 46 | 27 | 37 | 112 | 15  | 12 |
| 468680 | conserved hypothetical protein-                                   | 54 | 19 | 26 | 120 | 7   | 6  |
| 585498 | tonB dependent receptor family protein-                           | 50 | 23 | 32 | 116 | 11  | 9  |
| 542702 | conserved hypothetical protein-                                   | 32 | 41 | 56 | 93  | 34  | 27 |
| 114146 | conserved hypothetical protein-                                   | 59 | 14 | 19 | 124 | 3   | 2  |
| 114162 | conserved hypothetical protein-                                   | 59 | 14 | 19 | 124 | 3   | 2  |
| 114171 | 3'-5' exonuclease family protein-                                 | 59 | 14 | 19 | 124 | 3   | 2  |
| 114175 | DEAD/DEAH box helicase family protein-                            | 59 | 14 | 19 | 124 | 3   | 2  |
| 124448 | bacteriophage head to tail connecting family protein-             | 59 | 14 | 19 | 124 | 3   | 2  |
| 166959 | conserved hypothetical protein-                                   | 59 | 14 | 19 | 124 | 3   | 2  |
| 166966 | conserved hypothetical protein-                                   | 59 | 14 | 19 | 124 | 3   | 2  |
| 166981 | bacteriophage head to tail connecting family protein-             | 59 | 14 | 19 | 124 | 3   | 2  |
| 166983 | conserved hypothetical protein-                                   | 59 | 14 | 19 | 124 | 3   | 2  |
| 166988 | putative bbp13-                                                   | 59 | 14 | 19 | 124 | 3   | 2  |
| 166996 | putative membrane protein-                                        | 59 | 14 | 19 | 124 | 3   | 2  |
| 217820 | terminase small subunit-                                          | 59 | 14 | 19 | 124 | 3   | 2  |
| 217837 | acetyltransferase family protein-                                 | 59 | 14 | 19 | 124 | 3   | 2  |
| 254096 | conserved hypothetical protein-                                   | 59 | 14 | 19 | 124 | 3   | 2  |
| 348994 | PD-(D/E)XK nuclease superfamily protein-                          | 59 | 14 | 19 | 124 | 3   | 2  |
| 349567 | conserved hypothetical protein-                                   | 59 | 14 | 19 | 124 | 3   | 2  |
| 411759 | VRR-NUC domain protein-                                           | 59 | 14 | 19 | 124 | 3   | 2  |
| 426044 | conserved hypothetical protein-                                   | 59 | 14 | 19 | 124 | 3   | 2  |
| 426061 | conserved hypothetical protein-                                   | 59 | 14 | 19 | 124 | 3   | 2  |
| 426063 | conserved hypothetical protein-                                   | 59 | 14 | 19 | 124 | 3   | 2  |
| 426069 | conserved hypothetical protein-                                   | 59 | 14 | 19 | 124 | 3   | 2  |
| 513486 | terminase-like family protein-                                    | 59 | 14 | 19 | 124 | 3   | 2  |
| 514040 | hypothetical protein-                                             | 59 | 14 | 19 | 124 | 3   | 2  |
| 584714 | hypothetical protein-                                             | 59 | 14 | 19 | 124 | 3   | 2  |
| 674593 | putative bbp13-                                                   | 59 | 14 | 19 | 124 | 3   | 2  |
| 674606 | putative predicted protein-                                       | 59 | 14 | 19 | 124 | 3   | 2  |
| 674607 | phage/plasmid primase, P4 family, C-terminal domain protein-      | 59 | 14 | 19 | 124 | 3   | 2  |
| 709398 | putative membrane protein-                                        | 59 | 14 | 19 | 124 | 3   | 2  |
| 711861 | conserved hypothetical protein-                                   | 59 | 14 | 19 | 124 | 3   | 2  |
| 789355 | RNase_H superfamily protein-                                      | 59 | 14 | 19 | 124 | 3   | 2  |
| 789370 | terminase-like family protein-                                    | 59 | 14 | 19 | 124 | 3   | 2  |
| 789373 | conserved hypothetical protein-                                   | 59 | 14 | 19 | 124 | 3   | 2  |
| 789374 | conserved hypothetical protein-                                   | 59 | 14 | 19 | 124 | 3   | 2  |
| 45396  | conserved hypothetical protein-                                   | 62 | 11 | 15 | 126 | 1   | 1  |
| 696633 | conserved hypothetical protein-                                   | 62 | 11 | 15 | 126 | 1   | 1  |
| 185133 | prophage CP4-57 regulatory family protein-                        | 64 | 9  | 12 | 127 | 0   | 0  |
| 239443 | conserved hypothetical protein-                                   | 64 | 9  | 12 | 127 | 0   | 0  |
| 250287 | conserved hypothetical protein-                                   | 64 | 9  | 12 | 127 | 0   | 0  |
| 251703 | conserved hypothetical protein-                                   | 64 | 9  | 12 | 127 | 0   | 0  |
| 254612 | cobQ/CobB/MinD/ParA nucleotide binding domain protein-            | 64 | 9  | 12 | 127 | 0   | 0  |
| 278194 | conserved hypothetical protein-                                   | 64 | 9  | 12 | 127 | 0   | 0  |
| 317823 | integrase core domain protein-                                    | 64 | 9  | 12 | 127 | 0   | 0  |
| 318068 | CRISPR-associated family protein-                                 | 64 | 9  | 12 | 127 | 0   | 0  |
| 318070 | CRISPR-associated family protein-                                 | 64 | 9  | 12 | 127 | 0   | 0  |
| 333100 | phage integrase family protein-                                   | 64 | 9  | 12 | 127 | 0   | 0  |
| 335618 | CRISPR-associated family protein-                                 | 64 | 9  | 12 | 127 | 0   | 0  |
| 336253 | P-loop domain protein-                                            | 64 | 9  | 12 | 127 | 0   | 0  |
| 359303 | conserved hypothetical protein-                                   | 64 | 9  | 12 | 127 | 0   | 0  |
| 359307 | conserved hypothetical protein-                                   | 64 | 9  | 12 | 127 | 0   | 0  |
| 359563 | hxr-like helix-turn-helix family protein-                         | 64 | 9  | 12 | 127 | 0   | 0  |
| 3712   | conserved hypothetical protein-                                   | 64 | 9  | 12 | 127 | 0   | 0  |
| 3763   | hypothetical protein-                                             | 64 | 9  | 12 | 127 | 0   | 0  |
| 399469 | hypothetical protein-                                             | 64 | 9  | 12 | 127 | 0   | 0  |
| 412733 | alkylhydroperoxidase AhpD family core domain protein-             | 64 | 9  | 12 | 127 | 0   | 0  |
| 440370 | hypothetical protein-                                             | 64 | 9  | 12 | 127 | 0   | 0  |
| 453874 | transposase DDE domain protein-                                   | 64 | 9  | 12 | 127 | 0   | 0  |
| 474851 | conserved hypothetical protein-                                   | 64 | 9  | 12 | 127 | 0   | 0  |
| 488261 | rhs element Vgr family protein-                                   | 64 | 9  | 12 | 127 | 0   | 0  |
| 502194 | conserved hypothetical protein-                                   | 64 | 9  | 12 | 127 | 0   | 0  |
| 502958 | CRISPR-associated protein Csy3-                                   | 64 | 9  | 12 | 127 | 0   | 0  |
| 543186 | conserved hypothetical protein-                                   | 64 | 9  | 12 | 127 | 0   | 0  |
| 543323 | conserved hypothetical protein-                                   | 64 | 9  | 12 | 127 | 0   | 0  |
| 544801 | conserved hypothetical protein-                                   | 64 | 9  | 12 | 127 | 0   | 0  |
| 583453 | cobQ/CobB/MinD/ParA nucleotide binding domain protein-            | 64 | 9  | 12 | 127 | 0   | 0  |
| 628837 | cobQ/CobB/MinD/ParA nucleotide binding domain protein-            | 64 | 9  | 12 | 127 | 0   | 0  |
| 629269 | homeo-like domain protein-                                        | 64 | 9  | 12 | 127 | 0   | 0  |
| 630520 | DJ-1/Pfpl family protein-                                         | 64 | 9  | 12 | 127 | 0   | 0  |
| 699216 | hypothetical protein-                                             | 64 | 9  | 12 | 127 | 0   | 0  |
| 716453 | phage integrase family protein-                                   | 64 | 9  | 12 | 127 | 0   | 0  |
| 719454 | CRISPR-associated endonuclease Cas1-                              | 64 | 9  | 12 | 127 | 0   | 0  |
| 724820 | conserved hypothetical protein-                                   | 64 | 9  | 12 | 127 | 0   | 0  |
| 724832 | conserved hypothetical protein-                                   | 64 | 9  | 12 | 127 | 0   | 0  |
| 728417 | conserved hypothetical protein-                                   | 64 | 9  | 12 | 127 | 0   | 0  |
| 790957 | putative cRISPR-associated helicase Cas3-                         | 64 | 9  | 12 | 127 | 0   | 0  |
| 790958 | putative helicase-                                                | 64 | 9  | 12 | 127 | 0   | 0  |
| 799897 | conserved hypothetical protein-                                   | 64 | 9  | 12 | 127 | 0   | 0  |
| 803867 | HTH-like domain protein-                                          | 64 | 9  | 12 | 127 | 0   | 0  |
| 103777 | comE1 domain protein-                                             | 51 | 22 | 30 | 117 | 10  | 8  |
| 211335 | core-2/I-Branching enzyme family protein-                         | 58 | 15 | 21 | 123 | 4   | 3  |
| 320393 | putative predicted protein-                                       | 58 | 15 | 21 | 123 | 4   | 3  |
| 336997 | transposase DDE domain protein-                                   | 58 | 15 | 21 | 123 | 4   | 3  |
| 384130 | putative predicted protein-                                       | 58 | 15 | 21 | 123 | 4   | 3  |
| 527408 | IMS HHH motif family protein-                                     | 58 | 15 | 21 | 123 | 4   | 3  |
| 645920 | helix-turn-helix family protein-                                  | 58 | 15 | 21 | 123 | 4   | 3  |
| 145870 | copper-resistance , CopA family protein-                          | 39 | 34 | 47 | 102 | 25  | 20 |
| 630954 | copper-resistance , CopA family protein-                          | 39 | 34 | 47 | 102 | 25  | 20 |
| 62202  | thioesterase-like superfamily protein-                            | 1  | 72 | 99 | 24  | 103 | 81 |
| 555121 | acetyltransferase domain protein-                                 | 38 | 35 | 48 | 100 | 27  | 21 |

|        |                                                                   |    |    |    |     |    |    |
|--------|-------------------------------------------------------------------|----|----|----|-----|----|----|
| 630956 | response regulator-                                               | 38 | 35 | 48 | 100 | 27 | 21 |
| 752272 | response regulator-                                               | 38 | 35 | 48 | 100 | 27 | 21 |
| 767389 | conserved hypothetical protein-                                   | 38 | 35 | 48 | 100 | 27 | 21 |
| 84205  | response regulator-                                               | 38 | 35 | 48 | 100 | 27 | 21 |
| 730683 | stress-induced bacterial acidophilic repeat motif family protein- | 46 | 27 | 37 | 111 | 16 | 13 |
| 145874 | copper-translocating P-type ATPase-                               | 37 | 36 | 49 | 99  | 28 | 22 |
| 163706 | copC domain protein-                                              | 37 | 36 | 49 | 99  | 28 | 22 |
| 260969 | copper-translocating P-type ATPase-                               | 37 | 36 | 49 | 99  | 28 | 22 |
| 359672 | copper-translocating P-type ATPase-                               | 37 | 36 | 49 | 99  | 28 | 22 |
| 44315  | copper-translocating P-type ATPase-                               | 37 | 36 | 49 | 99  | 28 | 22 |
| 614970 | copC domain protein-                                              | 37 | 36 | 49 | 99  | 28 | 22 |
| 630958 | copper-translocating P-type ATPase-                               | 37 | 36 | 49 | 99  | 28 | 22 |
| 752269 | copC domain protein-                                              | 37 | 36 | 49 | 99  | 28 | 22 |
| 800985 | copC domain protein-                                              | 37 | 36 | 49 | 99  | 28 | 22 |
| 257528 | conserved hypothetical protein-                                   | 61 | 12 | 16 | 125 | 2  | 2  |
| 337438 | transglycosylase SLT domain protein-                              | 61 | 12 | 16 | 125 | 2  | 2  |
| 480535 | HNH endonuclease family protein-                                  | 61 | 12 | 16 | 125 | 2  | 2  |
| 521870 | tape measure domain protein-                                      | 61 | 12 | 16 | 125 | 2  | 2  |
| 514003 | bacteriophage lambda tail assembly I family protein-              | 48 | 25 | 34 | 113 | 14 | 11 |
| 30728  | conserved hypothetical protein-                                   | 43 | 30 | 41 | 107 | 20 | 16 |
| 344565 | conserved hypothetical protein-                                   | 43 | 30 | 41 | 107 | 20 | 16 |
| 390441 | tonB-dependent siderophore receptor family protein-               | 50 | 23 | 32 | 115 | 12 | 9  |
| 759016 | hipA-like C-terminal domain protein-                              | 52 | 21 | 29 | 117 | 10 | 8  |
| 139016 | conserved hypothetical protein-                                   | 40 | 33 | 45 | 102 | 25 | 20 |
| 139711 | phage/plasmid-like TIGR03299 family protein-                      | 40 | 33 | 45 | 102 | 25 | 20 |
| 142772 | phage/plasmid-like TIGR03299 family protein-                      | 40 | 33 | 45 | 102 | 25 | 20 |
| 200431 | phage/plasmid-like TIGR03299 family protein-                      | 40 | 33 | 45 | 102 | 25 | 20 |
| 21645  | phage/plasmid-like TIGR03299 family protein-                      | 40 | 33 | 45 | 102 | 25 | 20 |
| 254669 | phage/plasmid-like TIGR03299 family protein-                      | 40 | 33 | 45 | 102 | 25 | 20 |
| 317769 | phage/plasmid-like TIGR03299 family protein-                      | 40 | 33 | 45 | 102 | 25 | 20 |
| 320036 | phage/plasmid-like TIGR03299 family protein-                      | 40 | 33 | 45 | 102 | 25 | 20 |
| 320108 | phage/plasmid-like TIGR03299 family protein-                      | 40 | 33 | 45 | 102 | 25 | 20 |
| 413677 | phage/plasmid-like TIGR03299 family protein-                      | 40 | 33 | 45 | 102 | 25 | 20 |
| 474876 | phage/plasmid-like TIGR03299 family protein-                      | 40 | 33 | 45 | 102 | 25 | 20 |
| 510057 | phage/plasmid-like TIGR03299 family protein-                      | 40 | 33 | 45 | 102 | 25 | 20 |
| 518459 | phage/plasmid-like TIGR03299 family protein-                      | 40 | 33 | 45 | 102 | 25 | 20 |
| 577791 | phage/plasmid-like TIGR03299 family protein-                      | 40 | 33 | 45 | 102 | 25 | 20 |
| 598705 | phage/plasmid-like TIGR03299 family protein-                      | 40 | 33 | 45 | 102 | 25 | 20 |
| 600142 | phage/plasmid-like TIGR03299 family protein-                      | 40 | 33 | 45 | 102 | 25 | 20 |
| 626562 | conserved hypothetical protein-                                   | 40 | 33 | 45 | 102 | 25 | 20 |
| 629707 | phage/plasmid-like TIGR03299 family protein-                      | 40 | 33 | 45 | 102 | 25 | 20 |
| 629795 | conserved hypothetical protein-                                   | 40 | 33 | 45 | 102 | 25 | 20 |
| 630529 | phage/plasmid-like TIGR03299 family protein-                      | 40 | 33 | 45 | 102 | 25 | 20 |
| 645597 | phage/plasmid-like TIGR03299 family protein-                      | 40 | 33 | 45 | 102 | 25 | 20 |
| 688215 | phage/plasmid-like TIGR03299 family protein-                      | 40 | 33 | 45 | 102 | 25 | 20 |
| 717436 | phage/plasmid-like TIGR03299 family protein-                      | 40 | 33 | 45 | 102 | 25 | 20 |
| 788737 | phage/plasmid-like TIGR03299 family protein-                      | 40 | 33 | 45 | 102 | 25 | 20 |
| 802053 | phage/plasmid-like TIGR03299 family protein-                      | 40 | 33 | 45 | 102 | 25 | 20 |
| 85102  | phage/plasmid-like TIGR03299 family protein-                      | 40 | 33 | 45 | 102 | 25 | 20 |
| 105711 | glutamate racemase domain protein-                                | 60 | 13 | 18 | 124 | 3  | 2  |
| 166971 | conserved hypothetical protein-                                   | 60 | 13 | 18 | 124 | 3  | 2  |
| 329892 | conserved hypothetical protein-                                   | 60 | 13 | 18 | 124 | 3  | 2  |
| 330951 | conserved hypothetical protein-                                   | 60 | 13 | 18 | 124 | 3  | 2  |
| 332109 | conserved hypothetical protein-                                   | 60 | 13 | 18 | 124 | 3  | 2  |
| 340732 | phage family protein-                                             | 60 | 13 | 18 | 124 | 3  | 2  |
| 418489 | NUDIX domain protein-                                             | 60 | 13 | 18 | 124 | 3  | 2  |
| 426057 | helix-turn-helix family protein-                                  | 60 | 13 | 18 | 124 | 3  | 2  |
| 522219 | helix-turn-helix domain protein-                                  | 60 | 13 | 18 | 124 | 3  | 2  |
| 64080  | major Facilitator Superfamily protein-                            | 60 | 13 | 18 | 124 | 3  | 2  |
| 661443 | conserved hypothetical protein-                                   | 60 | 13 | 18 | 124 | 3  | 2  |
| 711865 | conserved hypothetical protein-                                   | 60 | 13 | 18 | 124 | 3  | 2  |
| 711880 | conserved hypothetical protein-                                   | 60 | 13 | 18 | 124 | 3  | 2  |
| 789361 | conserved hypothetical protein-                                   | 60 | 13 | 18 | 124 | 3  | 2  |
| 382354 | DDE domain protein-                                               | 48 | 25 | 34 | 112 | 15 | 12 |
| 1991   | conserved hypothetical protein-                                   | 63 | 10 | 14 | 126 | 1  | 1  |
| 211175 | hypothetical protein-                                             | 63 | 10 | 14 | 126 | 1  | 1  |
| 2939   | amino acid carrier family protein-                                | 63 | 10 | 14 | 126 | 1  | 1  |
| 313669 | conserved hypothetical protein-                                   | 63 | 10 | 14 | 126 | 1  | 1  |
| 470823 | conserved hypothetical protein-                                   | 63 | 10 | 14 | 126 | 1  | 1  |
| 471176 | polysaccharide biosynthesis/export family protein-                | 63 | 10 | 14 | 126 | 1  | 1  |
| 472065 | tonB dependent receptor family protein-                           | 63 | 10 | 14 | 126 | 1  | 1  |
| 481372 | tonB-dependent Receptor Plug domain protein-                      | 63 | 10 | 14 | 126 | 1  | 1  |
| 489394 | AAA domain protein-                                               | 63 | 10 | 14 | 126 | 1  | 1  |
| 514002 | conserved hypothetical protein-                                   | 63 | 10 | 14 | 126 | 1  | 1  |
| 645341 | putative file-                                                    | 63 | 10 | 14 | 126 | 1  | 1  |
| 646405 | AAA domain family protein-                                        | 63 | 10 | 14 | 126 | 1  | 1  |
| 780118 | hypothetical protein-                                             | 63 | 10 | 14 | 126 | 1  | 1  |
| 783179 | conserved hypothetical protein-                                   | 63 | 10 | 14 | 126 | 1  | 1  |
| 351879 | C-5 cytosine-specific DNA methylase family protein-               | 55 | 18 | 25 | 120 | 7  | 6  |
| 118361 | heavy metal sensor kinase family protein-                         | 38 | 35 | 48 | 99  | 28 | 22 |
| 248814 | heavy metal sensor kinase family protein-                         | 38 | 35 | 48 | 99  | 28 | 22 |
| 347462 | heavy metal sensor kinase family protein-                         | 38 | 35 | 48 | 99  | 28 | 22 |
| 454625 | heavy metal sensor kinase family protein-                         | 38 | 35 | 48 | 99  | 28 | 22 |
| 550336 | response regulator-                                               | 38 | 35 | 48 | 99  | 28 | 22 |
| 553432 | acetyltransferase domain protein-                                 | 38 | 35 | 48 | 99  | 28 | 22 |
| 630957 | heavy metal sensor kinase family protein-                         | 38 | 35 | 48 | 99  | 28 | 22 |
| 799993 | multicopper oxidase family protein-                               | 38 | 35 | 48 | 99  | 28 | 22 |
| 100811 | putative membrane protein-                                        | 65 | 8  | 11 | 127 | 0  | 0  |
| 101959 | putative predicted protein-                                       | 65 | 8  | 11 | 127 | 0  | 0  |
| 103376 | phage integrase family protein-                                   | 65 | 8  | 11 | 127 | 0  | 0  |
| 140781 | conserved hypothetical protein-                                   | 65 | 8  | 11 | 127 | 0  | 0  |
| 141573 | conserved hypothetical protein-                                   | 65 | 8  | 11 | 127 | 0  | 0  |
| 164751 | MJ0042 family finger-like domain protein-                         | 65 | 8  | 11 | 127 | 0  | 0  |
| 166152 | conserved hypothetical protein-                                   | 65 | 8  | 11 | 127 | 0  | 0  |
| 167071 | prophage CP4-57 regulatory family protein-                        | 65 | 8  | 11 | 127 | 0  | 0  |

|        |                                                              |    |    |    |     |    |    |
|--------|--------------------------------------------------------------|----|----|----|-----|----|----|
| 185113 | conserved hypothetical protein-                              | 65 | 8  | 11 | 127 | 0  | 0  |
| 185123 | conserved hypothetical protein-                              | 65 | 8  | 11 | 127 | 0  | 0  |
| 186057 | conserved hypothetical protein-                              | 65 | 8  | 11 | 127 | 0  | 0  |
| 200270 | phage integrase-                                             | 65 | 8  | 11 | 127 | 0  | 0  |
| 238902 | PAAR motif family protein-                                   | 65 | 8  | 11 | 127 | 0  | 0  |
| 239644 | lysR substrate binding domain protein-                       | 65 | 8  | 11 | 127 | 0  | 0  |
| 239648 | major Facilitator Superfamily protein-                       | 65 | 8  | 11 | 127 | 0  | 0  |
| 241959 | conserved hypothetical protein-                              | 65 | 8  | 11 | 127 | 0  | 0  |
| 241962 | bacterial regulatory , Fis family protein-                   | 65 | 8  | 11 | 127 | 0  | 0  |
| 256182 | phage integrase family protein-                              | 65 | 8  | 11 | 127 | 0  | 0  |
| 257360 | hypothetical protein-                                        | 65 | 8  | 11 | 127 | 0  | 0  |
| 2751   | hypothetical protein-                                        | 65 | 8  | 11 | 127 | 0  | 0  |
| 317782 | phage integrase family protein-                              | 65 | 8  | 11 | 127 | 0  | 0  |
| 320060 | conserved hypothetical protein-                              | 65 | 8  | 11 | 127 | 0  | 0  |
| 333064 | terminase-like family protein-                               | 65 | 8  | 11 | 127 | 0  | 0  |
| 333448 | conserved hypothetical protein-                              | 65 | 8  | 11 | 127 | 0  | 0  |
| 335054 | polysaccharide biosynthesis/export family protein-           | 65 | 8  | 11 | 127 | 0  | 0  |
| 335055 | low molecular weight protein-tyrosine-phosphatase ptp-       | 65 | 8  | 11 | 127 | 0  | 0  |
| 3381   | conserved hypothetical protein-                              | 65 | 8  | 11 | 127 | 0  | 0  |
| 357069 | conserved hypothetical protein-                              | 65 | 8  | 11 | 127 | 0  | 0  |
| 357091 | conserved hypothetical protein-                              | 65 | 8  | 11 | 127 | 0  | 0  |
| 3747   | conserved hypothetical protein-                              | 65 | 8  | 11 | 127 | 0  | 0  |
| 397861 | conserved hypothetical protein-                              | 65 | 8  | 11 | 127 | 0  | 0  |
| 413706 | phage integrase family protein-                              | 65 | 8  | 11 | 127 | 0  | 0  |
| 453548 | putative cation efflux system protein-                       | 65 | 8  | 11 | 127 | 0  | 0  |
| 455257 | conserved hypothetical protein-                              | 65 | 8  | 11 | 127 | 0  | 0  |
| 472597 | putative phage-type endonuclease domain protein-             | 65 | 8  | 11 | 127 | 0  | 0  |
| 472598 | yqaJ-like viral recombinase domain protein-                  | 65 | 8  | 11 | 127 | 0  | 0  |
| 473652 | WYL domain protein-                                          | 65 | 8  | 11 | 127 | 0  | 0  |
| 474942 | conserved hypothetical protein-                              | 65 | 8  | 11 | 127 | 0  | 0  |
| 488401 | xylose isomerase-like TIM barrel family protein-             | 65 | 8  | 11 | 127 | 0  | 0  |
| 488402 | YCI1-related domain protein-                                 | 65 | 8  | 11 | 127 | 0  | 0  |
| 489405 | PAAR motif family protein-                                   | 65 | 8  | 11 | 127 | 0  | 0  |
| 489718 | conserved hypothetical protein-                              | 65 | 8  | 11 | 127 | 0  | 0  |
| 489747 | glycosyl transferase 2 family protein-                       | 65 | 8  | 11 | 127 | 0  | 0  |
| 502088 | conserved hypothetical protein-                              | 65 | 8  | 11 | 127 | 0  | 0  |
| 507208 | conserved hypothetical protein-                              | 65 | 8  | 11 | 127 | 0  | 0  |
| 514787 | conserved hypothetical protein-                              | 65 | 8  | 11 | 127 | 0  | 0  |
| 528051 | conserved hypothetical protein-                              | 65 | 8  | 11 | 127 | 0  | 0  |
| 542183 | conserved hypothetical protein-                              | 65 | 8  | 11 | 127 | 0  | 0  |
| 542669 | sugar (and other) transporter family protein-                | 65 | 8  | 11 | 127 | 0  | 0  |
| 542670 | 3-hydroxyacyl-CoA dehydrogenase, NAD binding domain protein- | 65 | 8  | 11 | 127 | 0  | 0  |
| 545040 | putative membrane protein-                                   | 65 | 8  | 11 | 127 | 0  | 0  |
| 545067 | endodeoxyribonuclease RusA family protein-                   | 65 | 8  | 11 | 127 | 0  | 0  |
| 568442 | conserved hypothetical protein-                              | 65 | 8  | 11 | 127 | 0  | 0  |
| 583673 | conserved hypothetical protein-                              | 65 | 8  | 11 | 127 | 0  | 0  |
| 595205 | WYL domain protein-                                          | 65 | 8  | 11 | 127 | 0  | 0  |
| 598672 | conserved hypothetical protein-                              | 65 | 8  | 11 | 127 | 0  | 0  |
| 629797 | conserved hypothetical protein-                              | 65 | 8  | 11 | 127 | 0  | 0  |
| 630523 | conserved hypothetical protein-                              | 65 | 8  | 11 | 127 | 0  | 0  |
| 696465 | conserved hypothetical protein-                              | 65 | 8  | 11 | 127 | 0  | 0  |
| 712596 | conserved hypothetical protein-                              | 65 | 8  | 11 | 127 | 0  | 0  |
| 712670 | lysR substrate binding domain protein-                       | 65 | 8  | 11 | 127 | 0  | 0  |
| 715276 | hypothetical protein-                                        | 65 | 8  | 11 | 127 | 0  | 0  |
| 716458 | DDE domain protein-                                          | 65 | 8  | 11 | 127 | 0  | 0  |
| 716601 | phage integrase domain protein-                              | 65 | 8  | 11 | 127 | 0  | 0  |
| 716754 | conserved hypothetical protein-                              | 65 | 8  | 11 | 127 | 0  | 0  |
| 716771 | phage integrase family protein-                              | 65 | 8  | 11 | 127 | 0  | 0  |
| 720074 | conserved hypothetical protein-                              | 65 | 8  | 11 | 127 | 0  | 0  |
| 728419 | conserved hypothetical protein-                              | 65 | 8  | 11 | 127 | 0  | 0  |
| 732235 | putative lipoprotein-                                        | 65 | 8  | 11 | 127 | 0  | 0  |
| 791500 | conserved hypothetical protein-                              | 65 | 8  | 11 | 127 | 0  | 0  |
| 800887 | conserved hypothetical protein-                              | 65 | 8  | 11 | 127 | 0  | 0  |
| 98820  | phage minor tail family protein-                             | 65 | 8  | 11 | 127 | 0  | 0  |
| 122348 | putative membrane protein-                                   | 50 | 23 | 32 | 114 | 13 | 10 |
| 453135 | putative membrane protein-                                   | 50 | 23 | 32 | 114 | 13 | 10 |
| 490718 | putative membrane protein-                                   | 50 | 23 | 32 | 114 | 13 | 10 |
| 727930 | putative membrane protein-                                   | 50 | 23 | 32 | 114 | 13 | 10 |
| 410758 | phage minor tail protein L-                                  | 49 | 24 | 33 | 113 | 14 | 11 |
| 518435 | description family protein-                                  | 57 | 16 | 22 | 121 | 6  | 5  |
| 542173 | conserved hypothetical protein-                              | 62 | 11 | 15 | 125 | 2  | 2  |
| 357430 | conserved hypothetical protein-                              | 29 | 44 | 60 | 84  | 43 | 34 |
| 110701 | putative bacteriophage protein-                              | 59 | 14 | 19 | 123 | 4  | 3  |
| 110711 | putative phage terminase, large subunit-                     | 59 | 14 | 19 | 123 | 4  | 3  |
| 111449 | putative predicted protein-                                  | 59 | 14 | 19 | 123 | 4  | 3  |
| 163646 | conserved hypothetical protein-                              | 59 | 14 | 19 | 123 | 4  | 3  |
| 210082 | phage head morphogenesis , SP1 gp7 family domain protein-    | 59 | 14 | 19 | 123 | 4  | 3  |
| 210084 | putative bacteriophage protein-                              | 59 | 14 | 19 | 123 | 4  | 3  |
| 210088 | putative bacteriophage protein-                              | 59 | 14 | 19 | 123 | 4  | 3  |
| 334727 | conserved hypothetical protein-                              | 59 | 14 | 19 | 123 | 4  | 3  |
| 334728 | putative bacteriophage protein-                              | 59 | 14 | 19 | 123 | 4  | 3  |
| 334736 | phage head morphogenesis , SP1 gp7 family domain protein-    | 59 | 14 | 19 | 123 | 4  | 3  |
| 348147 | conserved hypothetical protein-                              | 59 | 14 | 19 | 123 | 4  | 3  |
| 408866 | putative bacteriophage protein-                              | 59 | 14 | 19 | 123 | 4  | 3  |
| 486253 | conserved hypothetical protein-                              | 59 | 14 | 19 | 123 | 4  | 3  |
| 63956  | conserved hypothetical protein-                              | 59 | 14 | 19 | 123 | 4  | 3  |
| 63975  | conserved hypothetical protein-                              | 59 | 14 | 19 | 123 | 4  | 3  |
| 664003 | conserved hypothetical protein-                              | 59 | 14 | 19 | 123 | 4  | 3  |
| 711406 | putative bacteriophage protein-                              | 59 | 14 | 19 | 123 | 4  | 3  |
| 711414 | putative bacteriophage protein-                              | 59 | 14 | 19 | 123 | 4  | 3  |
| 469082 | conserved hypothetical protein-                              | 56 | 17 | 23 | 120 | 7  | 6  |
| 124469 | conserved hypothetical protein-                              | 61 | 12 | 16 | 124 | 3  | 2  |
| 213370 | conserved hypothetical protein-                              | 61 | 12 | 16 | 124 | 3  | 2  |
| 217805 | conserved hypothetical protein-                              | 61 | 12 | 16 | 124 | 3  | 2  |
| 237518 | conserved hypothetical protein-                              | 61 | 12 | 16 | 124 | 3  | 2  |

|        |                                                                                     |    |    |    |     |     |    |
|--------|-------------------------------------------------------------------------------------|----|----|----|-----|-----|----|
| 256338 | D12 class N6 adenine-specific DNA methyltransferase family protein-                 | 61 | 12 | 16 | 124 | 3   | 2  |
| 330952 | conserved hypothetical protein-                                                     | 61 | 12 | 16 | 124 | 3   | 2  |
| 330956 | conserved hypothetical protein-                                                     | 61 | 12 | 16 | 124 | 3   | 2  |
| 341408 | conserved hypothetical protein-                                                     | 61 | 12 | 16 | 124 | 3   | 2  |
| 383321 | hypothetical protein-                                                               | 61 | 12 | 16 | 124 | 3   | 2  |
| 470088 | acetyltransferase domain protein-                                                   | 61 | 12 | 16 | 124 | 3   | 2  |
| 513508 | conserved hypothetical protein-                                                     | 61 | 12 | 16 | 124 | 3   | 2  |
| 514039 | hypothetical protein-                                                               | 61 | 12 | 16 | 124 | 3   | 2  |
| 646542 | conserved hypothetical protein-                                                     | 61 | 12 | 16 | 124 | 3   | 2  |
| 661427 | phage lysozyme family protein-                                                      | 61 | 12 | 16 | 124 | 3   | 2  |
| 661434 | conserved hypothetical protein-                                                     | 61 | 12 | 16 | 124 | 3   | 2  |
| 674590 | transglycosylase SLT domain protein-                                                | 61 | 12 | 16 | 124 | 3   | 2  |
| 675576 | conserved hypothetical protein-                                                     | 61 | 12 | 16 | 124 | 3   | 2  |
| 711869 | conserved hypothetical protein-                                                     | 61 | 12 | 16 | 124 | 3   | 2  |
| 711870 | conserved hypothetical protein-                                                     | 61 | 12 | 16 | 124 | 3   | 2  |
| 711889 | conserved hypothetical protein-                                                     | 61 | 12 | 16 | 124 | 3   | 2  |
| 481578 | copper binding periplasmic CusF family protein-                                     | 52 | 21 | 29 | 116 | 11  | 9  |
| 789327 | conserved hypothetical protein-                                                     | 41 | 32 | 44 | 102 | 25  | 20 |
| 104366 | conserved hypothetical protein-                                                     | 64 | 9  | 12 | 126 | 1   | 1  |
| 200486 | phage tail family protein-                                                          | 64 | 9  | 12 | 126 | 1   | 1  |
| 201319 | recT family protein-                                                                | 64 | 9  | 12 | 126 | 1   | 1  |
| 347357 | conserved hypothetical protein-                                                     | 64 | 9  | 12 | 126 | 1   | 1  |
| 359938 | capsular exopolysaccharide family domain protein-                                   | 64 | 9  | 12 | 126 | 1   | 1  |
| 398786 | conserved hypothetical protein-                                                     | 64 | 9  | 12 | 126 | 1   | 1  |
| 398787 | conserved hypothetical protein-                                                     | 64 | 9  | 12 | 126 | 1   | 1  |
| 46628  | type I secretion C-terminal target domain protein-                                  | 64 | 9  | 12 | 126 | 1   | 1  |
| 46725  | conserved hypothetical protein-                                                     | 64 | 9  | 12 | 126 | 1   | 1  |
| 471040 | conserved hypothetical protein-                                                     | 64 | 9  | 12 | 126 | 1   | 1  |
| 471174 | capsular exopolysaccharide family domain protein-                                   | 64 | 9  | 12 | 126 | 1   | 1  |
| 475197 | fibronectin type III domain protein-                                                | 64 | 9  | 12 | 126 | 1   | 1  |
| 475581 | phage tail family protein-                                                          | 64 | 9  | 12 | 126 | 1   | 1  |
| 514995 | tonB dependent receptor family protein-                                             | 64 | 9  | 12 | 126 | 1   | 1  |
| 543883 | surface antigen variable number repeat family protein-                              | 64 | 9  | 12 | 126 | 1   | 1  |
| 596876 | conserved hypothetical protein-                                                     | 64 | 9  | 12 | 126 | 1   | 1  |
| 644830 | fibronectin type III domain protein-                                                | 64 | 9  | 12 | 126 | 1   | 1  |
| 675913 | hypothetical protein-                                                               | 64 | 9  | 12 | 126 | 1   | 1  |
| 718404 | helix-turn-helix domain protein-                                                    | 64 | 9  | 12 | 126 | 1   | 1  |
| 718406 | conserved hypothetical protein-                                                     | 64 | 9  | 12 | 126 | 1   | 1  |
| 731832 | outer membrane beta-barrel domain protein-                                          | 64 | 9  | 12 | 126 | 1   | 1  |
| 791452 | fibronectin type III domain protein-                                                | 64 | 9  | 12 | 126 | 1   | 1  |
| 801036 | fibronectin type III domain protein-                                                | 64 | 9  | 12 | 126 | 1   | 1  |
| 811    | acyl-coenzyme A:6-aminopenicillanic acid acyl-transferase family protein-           | 64 | 9  | 12 | 126 | 1   | 1  |
| 98406  | helix-turn-helix domain protein-                                                    | 64 | 9  | 12 | 126 | 1   | 1  |
| 455060 | conserved hypothetical protein-                                                     | 47 | 26 | 36 | 109 | 18  | 14 |
| 553942 | conserved hypothetical protein-                                                     | 47 | 26 | 36 | 109 | 18  | 14 |
| 665212 | conserved hypothetical protein-                                                     | 47 | 26 | 36 | 109 | 18  | 14 |
| 730984 | conserved hypothetical protein-                                                     | 47 | 26 | 36 | 109 | 18  | 14 |
| 666933 | ABC transporter family protein-                                                     | 49 | 24 | 33 | 112 | 15  | 12 |
| 187508 | conserved hypothetical protein-                                                     | 1  | 72 | 99 | 20  | 107 | 84 |
| 100552 | coA-transferase III family protein-                                                 | 66 | 7  | 10 | 127 | 0   | 0  |
| 100555 | bacterial transcriptional regulator family protein-                                 | 66 | 7  | 10 | 127 | 0   | 0  |
| 103060 | DDE superendonuclease family protein-                                               | 66 | 7  | 10 | 127 | 0   | 0  |
| 104037 | binding-protein-dependent transport system inner membrane component family protein- | 66 | 7  | 10 | 127 | 0   | 0  |
| 104171 | conserved hypothetical protein-                                                     | 66 | 7  | 10 | 127 | 0   | 0  |
| 104507 | conserved hypothetical protein-                                                     | 66 | 7  | 10 | 127 | 0   | 0  |
| 104696 | conserved hypothetical protein-                                                     | 66 | 7  | 10 | 127 | 0   | 0  |
| 104698 | putative membrane protein-                                                          | 66 | 7  | 10 | 127 | 0   | 0  |
| 1284   | outer membrane beta-barrel domain protein-                                          | 66 | 7  | 10 | 127 | 0   | 0  |
| 142532 | conserved hypothetical protein-                                                     | 66 | 7  | 10 | 127 | 0   | 0  |
| 1666   | conserved hypothetical protein-                                                     | 66 | 7  | 10 | 127 | 0   | 0  |
| 1668   | conserved hypothetical protein-                                                     | 66 | 7  | 10 | 127 | 0   | 0  |
| 1669   | helix-turn-helix domain protein-                                                    | 66 | 7  | 10 | 127 | 0   | 0  |
| 1670   | HTH domain protein-                                                                 | 66 | 7  | 10 | 127 | 0   | 0  |
| 1673   | flagellin N-methylase family protein-                                               | 66 | 7  | 10 | 127 | 0   | 0  |
| 183298 | helix-turn-helix family protein-                                                    | 66 | 7  | 10 | 127 | 0   | 0  |
| 184601 | conserved hypothetical protein-                                                     | 66 | 7  | 10 | 127 | 0   | 0  |
| 185111 | conserved hypothetical protein-                                                     | 66 | 7  | 10 | 127 | 0   | 0  |
| 185121 | conserved hypothetical protein-                                                     | 66 | 7  | 10 | 127 | 0   | 0  |
| 185122 | putative lipoprotein-                                                               | 66 | 7  | 10 | 127 | 0   | 0  |
| 185135 | addiction module toxin, Txe/YoeB family-                                            | 66 | 7  | 10 | 127 | 0   | 0  |
| 186609 | conserved hypothetical protein-                                                     | 66 | 7  | 10 | 127 | 0   | 0  |
| 240781 | putative predicted protein-                                                         | 66 | 7  | 10 | 127 | 0   | 0  |
| 250726 | RDD family protein-                                                                 | 66 | 7  | 10 | 127 | 0   | 0  |
| 251440 | rhs element Vgr family protein-                                                     | 66 | 7  | 10 | 127 | 0   | 0  |
| 252121 | citrate transporter family protein-                                                 | 66 | 7  | 10 | 127 | 0   | 0  |
| 254838 | putative predicted protein-                                                         | 66 | 7  | 10 | 127 | 0   | 0  |
| 257464 | insB domain protein-                                                                | 66 | 7  | 10 | 127 | 0   | 0  |
| 263135 | flagellin N-methylase family protein-                                               | 66 | 7  | 10 | 127 | 0   | 0  |
| 2902   | CSLREA domain protein-                                                              | 66 | 7  | 10 | 127 | 0   | 0  |
| 306889 | conserved hypothetical protein-                                                     | 66 | 7  | 10 | 127 | 0   | 0  |
| 314867 | conserved hypothetical protein-                                                     | 66 | 7  | 10 | 127 | 0   | 0  |
| 317070 | acyl-CoA dehydrogenase, C-terminal domain protein-                                  | 66 | 7  | 10 | 127 | 0   | 0  |
| 317075 | secretory lipase family protein-                                                    | 66 | 7  | 10 | 127 | 0   | 0  |
| 317076 | luciferase-like monooxygenase family protein-                                       | 66 | 7  | 10 | 127 | 0   | 0  |
| 319433 | conserved hypothetical protein-                                                     | 66 | 7  | 10 | 127 | 0   | 0  |
| 319485 | glycosyltransferase 52 family protein-                                              | 66 | 7  | 10 | 127 | 0   | 0  |
| 320111 | conserved hypothetical protein-                                                     | 66 | 7  | 10 | 127 | 0   | 0  |
| 320113 | putative membrane protein-                                                          | 66 | 7  | 10 | 127 | 0   | 0  |
| 320421 | conserved hypothetical protein-                                                     | 66 | 7  | 10 | 127 | 0   | 0  |
| 333354 | luciferase-like monooxygenase family protein-                                       | 66 | 7  | 10 | 127 | 0   | 0  |
| 335056 | capsular exopolysaccharide family domain protein-                                   | 66 | 7  | 10 | 127 | 0   | 0  |
| 336029 | DDE superendonuclease family protein-                                               | 66 | 7  | 10 | 127 | 0   | 0  |
| 336156 | transposase family protein-                                                         | 66 | 7  | 10 | 127 | 0   | 0  |
| 356639 | putative predicted protein-                                                         | 66 | 7  | 10 | 127 | 0   | 0  |
| 357107 | conserved hypothetical protein-                                                     | 66 | 7  | 10 | 127 | 0   | 0  |

|        |                                                                          |    |    |    |     |     |    |
|--------|--------------------------------------------------------------------------|----|----|----|-----|-----|----|
| 359586 | conserved hypothetical protein-                                          | 66 | 7  | 10 | 127 | 0   | 0  |
| 398653 | phage integrase family protein-                                          | 66 | 7  | 10 | 127 | 0   | 0  |
| 398655 | conserved hypothetical protein-                                          | 66 | 7  | 10 | 127 | 0   | 0  |
| 413745 | conserved hypothetical protein-                                          | 66 | 7  | 10 | 127 | 0   | 0  |
| 440411 | putative predicted protein-                                              | 66 | 7  | 10 | 127 | 0   | 0  |
| 443083 | conserved hypothetical protein-                                          | 66 | 7  | 10 | 127 | 0   | 0  |
| 453742 | hypothetical protein-                                                    | 66 | 7  | 10 | 127 | 0   | 0  |
| 456335 | conserved hypothetical protein-                                          | 66 | 7  | 10 | 127 | 0   | 0  |
| 473624 | putative membrane protein-                                               | 66 | 7  | 10 | 127 | 0   | 0  |
| 475251 | conserved hypothetical protein-                                          | 66 | 7  | 10 | 127 | 0   | 0  |
| 475293 | class II Aldolase and Adducin N-terminal domain protein-                 | 66 | 7  | 10 | 127 | 0   | 0  |
| 475294 | NMT1/THIS like family protein-                                           | 66 | 7  | 10 | 127 | 0   | 0  |
| 488398 | outer membrane porin, OprD family-                                       | 66 | 7  | 10 | 127 | 0   | 0  |
| 489018 | peptidase inhibitor I78 family protein-                                  | 66 | 7  | 10 | 127 | 0   | 0  |
| 489746 | polysaccharide biosynthesis family protein-                              | 66 | 7  | 10 | 127 | 0   | 0  |
| 490202 | conserved hypothetical protein-                                          | 66 | 7  | 10 | 127 | 0   | 0  |
| 490203 | conserved hypothetical protein-                                          | 66 | 7  | 10 | 127 | 0   | 0  |
| 490730 | conserved hypothetical protein-                                          | 66 | 7  | 10 | 127 | 0   | 0  |
| 500445 | hypothetical protein-                                                    | 66 | 7  | 10 | 127 | 0   | 0  |
| 500455 | putative phage-type endonuclease domain protein-                         | 66 | 7  | 10 | 127 | 0   | 0  |
| 505    | conserved hypothetical protein-                                          | 66 | 7  | 10 | 127 | 0   | 0  |
| 507216 | antitoxin of toxin-antitoxin stability system N-terminal family protein- | 66 | 7  | 10 | 127 | 0   | 0  |
| 518447 | macro domain protein-                                                    | 66 | 7  | 10 | 127 | 0   | 0  |
| 518449 | conserved hypothetical protein-                                          | 66 | 7  | 10 | 127 | 0   | 0  |
| 518469 | conserved hypothetical protein-                                          | 66 | 7  | 10 | 127 | 0   | 0  |
| 542664 | HMGL-like family protein-                                                | 66 | 7  | 10 | 127 | 0   | 0  |
| 543160 | glycosyl transferases group 1 family protein-                            | 66 | 7  | 10 | 127 | 0   | 0  |
| 543458 | conserved hypothetical protein-                                          | 66 | 7  | 10 | 127 | 0   | 0  |
| 544797 | putative predicted protein-                                              | 66 | 7  | 10 | 127 | 0   | 0  |
| 567900 | ankyrin repeats family protein-                                          | 66 | 7  | 10 | 127 | 0   | 0  |
| 568439 | conserved hypothetical protein-                                          | 66 | 7  | 10 | 127 | 0   | 0  |
| 568448 | putative phage-type endonuclease domain protein-                         | 66 | 7  | 10 | 127 | 0   | 0  |
| 580784 | creatinase-                                                              | 66 | 7  | 10 | 127 | 0   | 0  |
| 583352 | transposase family protein-                                              | 66 | 7  | 10 | 127 | 0   | 0  |
| 583677 | putative domain protein-                                                 | 66 | 7  | 10 | 127 | 0   | 0  |
| 584724 | helix-turn-helix family protein-                                         | 66 | 7  | 10 | 127 | 0   | 0  |
| 594362 | hypothetical protein-                                                    | 66 | 7  | 10 | 127 | 0   | 0  |
| 599171 | nickel import ATP-binding protein NikE-                                  | 66 | 7  | 10 | 127 | 0   | 0  |
| 606027 | helix-turn-helix family protein-                                         | 66 | 7  | 10 | 127 | 0   | 0  |
| 607726 | putative predicted protein-                                              | 66 | 7  | 10 | 127 | 0   | 0  |
| 630564 | capsular exopolysaccharide family domain protein-                        | 66 | 7  | 10 | 127 | 0   | 0  |
| 630646 | conserved hypothetical protein-                                          | 66 | 7  | 10 | 127 | 0   | 0  |
| 698747 | transposase family protein-                                              | 66 | 7  | 10 | 127 | 0   | 0  |
| 715066 | conserved hypothetical protein-                                          | 66 | 7  | 10 | 127 | 0   | 0  |
| 715650 | conserved hypothetical protein-                                          | 66 | 7  | 10 | 127 | 0   | 0  |
| 716596 | creatinase-                                                              | 66 | 7  | 10 | 127 | 0   | 0  |
| 718301 | ABC transporter family protein-                                          | 66 | 7  | 10 | 127 | 0   | 0  |
| 718302 | NMT1/THIS like family protein-                                           | 66 | 7  | 10 | 127 | 0   | 0  |
| 720264 | DDE superendonuclease family protein-                                    | 66 | 7  | 10 | 127 | 0   | 0  |
| 724834 | conserved hypothetical protein-                                          | 66 | 7  | 10 | 127 | 0   | 0  |
| 787821 | conserved hypothetical protein-                                          | 66 | 7  | 10 | 127 | 0   | 0  |
| 787861 | type I secretion C-terminal, TIGR03661 family domain protein-            | 66 | 7  | 10 | 127 | 0   | 0  |
| 788056 | putative aBC-type dipeptide transport system, periplasmic component-     | 66 | 7  | 10 | 127 | 0   | 0  |
| 788057 | bacterial extracellular solute-binding, 5 Middle family protein-         | 66 | 7  | 10 | 127 | 0   | 0  |
| 788064 | ABC transporter family protein-                                          | 66 | 7  | 10 | 127 | 0   | 0  |
| 788065 | tonB-dependent Receptor Plug domain protein-                             | 66 | 7  | 10 | 127 | 0   | 0  |
| 788066 | tonB dependent receptor family protein-                                  | 66 | 7  | 10 | 127 | 0   | 0  |
| 788739 | conserved hypothetical protein-                                          | 66 | 7  | 10 | 127 | 0   | 0  |
| 789727 | addiction module toxin, Txe/YoeB family-                                 | 66 | 7  | 10 | 127 | 0   | 0  |
| 789906 | BAAT / Acyl-CoA thioester hydrolase C terminal family protein-           | 66 | 7  | 10 | 127 | 0   | 0  |
| 790527 | conserved hypothetical protein-                                          | 66 | 7  | 10 | 127 | 0   | 0  |
| 790797 | HNH endonuclease family protein-                                         | 66 | 7  | 10 | 127 | 0   | 0  |
| 356841 | outer membrane transport family protein-                                 | 26 | 47 | 64 | 77  | 50  | 39 |
| 481734 | outer membrane transport family protein-                                 | 26 | 47 | 64 | 77  | 50  | 39 |
| 388195 | beta-lactamase enzyme family protein-                                    | 2  | 71 | 97 | 24  | 103 | 81 |
| 200488 | nlpC/P60 family protein-                                                 | 51 | 22 | 30 | 114 | 13  | 10 |
| 410757 | nlpC/P60 family protein-                                                 | 51 | 22 | 30 | 114 | 13  | 10 |
| 704184 | nlpC/P60 family protein-                                                 | 51 | 22 | 30 | 114 | 13  | 10 |
| 791454 | nlpC/P60 family protein-                                                 | 51 | 22 | 30 | 114 | 13  | 10 |
| 98817  | nlpC/P60 family protein-                                                 | 51 | 22 | 30 | 114 | 13  | 10 |
| 155416 | ferrous iron transport protein B-                                        | 40 | 33 | 45 | 99  | 28  | 22 |
| 258407 | feoA domain protein-                                                     | 40 | 33 | 45 | 99  | 28  | 22 |
| 44304  | ferrous iron transport protein B-                                        | 40 | 33 | 45 | 99  | 28  | 22 |
| 631543 | feoA domain protein-                                                     | 40 | 33 | 45 | 99  | 28  | 22 |
| 110695 | conserved hypothetical protein-                                          | 60 | 13 | 18 | 123 | 4   | 3  |
| 110698 | putative bacteriophage protein-                                          | 60 | 13 | 18 | 123 | 4   | 3  |
| 210094 | putative bacteriophage protein-                                          | 60 | 13 | 18 | 123 | 4   | 3  |
| 210095 | conserved hypothetical protein-                                          | 60 | 13 | 18 | 123 | 4   | 3  |
| 221594 | conserved hypothetical protein-                                          | 60 | 13 | 18 | 123 | 4   | 3  |
| 221602 | putative translation initiation factor IF-2-                             | 60 | 13 | 18 | 123 | 4   | 3  |
| 424203 | conserved hypothetical protein-                                          | 60 | 13 | 18 | 123 | 4   | 3  |
| 486236 | conserved hypothetical protein-                                          | 60 | 13 | 18 | 123 | 4   | 3  |
| 513563 | peptidase S24-like family protein-                                       | 60 | 13 | 18 | 123 | 4   | 3  |
| 518939 | putative bacteriophage protein-                                          | 60 | 13 | 18 | 123 | 4   | 3  |
| 518944 | conserved hypothetical protein-                                          | 60 | 13 | 18 | 123 | 4   | 3  |
| 63961  | putative bacteriophage protein-                                          | 60 | 13 | 18 | 123 | 4   | 3  |
| 63964  | putative bacteriophage protein-                                          | 60 | 13 | 18 | 123 | 4   | 3  |
| 63971  | conserved hypothetical protein-                                          | 60 | 13 | 18 | 123 | 4   | 3  |
| 709050 | baseplate J-like family protein-                                         | 60 | 13 | 18 | 123 | 4   | 3  |
| 30729  | putative membrane protein-                                               | 46 | 27 | 37 | 107 | 20  | 16 |



Suppl Table 9. Centroids found in greater frequency in Perireactor-carbapenem resistant isolates

| Centroid ID | Annotation                                                                          | Peri_Resis_A | Peri_Resis_P | % freq | Peri_sens_A | Peri_sens_P | % freq |
|-------------|-------------------------------------------------------------------------------------|--------------|--------------|--------|-------------|-------------|--------|
| 621762      | 2Fe-2S iron-sulfur cluster binding domain protein-                                  | 0            | 72           | 100    | 8           | 43          | 84     |
| 462651      | 3-beta hydroxysteroid dehydrogenase/isomerase family protein-                       | 24           | 48           | 67     | 45          | 6           | 12     |
| 774469      | 3-beta hydroxysteroid dehydrogenase/isomerase family protein-                       | 24           | 48           | 67     | 45          | 6           | 12     |
| 806666      | 3-beta hydroxysteroid dehydrogenase/isomerase family protein-                       | 43           | 29           | 40     | 50          | 1           | 2      |
| 184498      | 3-beta hydroxysteroid dehydrogenase/isomerase family protein-                       | 36           | 36           | 50     | 46          | 5           | 10     |
| 604474      | 3-beta hydroxysteroid dehydrogenase/isomerase family protein-                       | 36           | 36           | 50     | 46          | 5           | 10     |
| 707637      | 3-beta hydroxysteroid dehydrogenase/isomerase family protein-                       | 36           | 36           | 50     | 46          | 5           | 10     |
| 719215      | 3-beta hydroxysteroid dehydrogenase/isomerase family protein-                       | 36           | 36           | 50     | 46          | 5           | 10     |
| 791714      | 4'-phosphopantetheinyl transferase superfamily protein-                             | 0            | 72           | 100    | 9           | 42          | 82     |
| 804733      | AAA domain protein-                                                                 | 13           | 59           | 82     | 37          | 14          | 27     |
| 190197      | ABC transporter, substrate-binding, aliphatic sulfonates family protein-            | 10           | 62           | 86     | 24          | 27          | 53     |
| 272288      | acetamidase/Formamidase family protein-                                             | 20           | 52           | 72     | 32          | 19          | 37     |
| 653217      | acetoacetate decarboxylase family protein-                                          | 14           | 58           | 81     | 35          | 16          | 31     |
| 66358       | acetyl xylan esterase family protein-                                               | 11           | 61           | 85     | 31          | 20          | 39     |
| 168890      | acetyltransferase domain protein-                                                   | 1            | 71           | 99     | 12          | 39          | 76     |
| 294414      | acetyltransferase domain protein-                                                   | 19           | 53           | 74     | 31          | 20          | 39     |
| 62506       | acyl-CoA dehydrogenase, N-terminal domain protein-                                  | 14           | 58           | 81     | 35          | 16          | 31     |
| 167532      | acyltransferase family protein-                                                     | 19           | 53           | 74     | 37          | 14          | 27     |
| 428118      | aldehyde dehydrogenase family protein-                                              | 15           | 57           | 79     | 35          | 16          | 31     |
| 349797      | aldehyde dehydrogenase family protein-                                              | 1            | 71           | 99     | 16          | 35          | 69     |
| 589046      | aldehyde dehydrogenase family protein-                                              | 2            | 70           | 97     | 17          | 34          | 67     |
| 804842      | aldehyde dehydrogenase family protein-                                              | 2            | 52           | 72     | 34          | 17          | 33     |
| 223653      | alpha/beta hydrolase fold family protein-                                           | 14           | 58           | 81     | 37          | 14          | 27     |
| 522766      | amidohydrolase family protein-                                                      | 6            | 66           | 92     | 25          | 26          | 51     |
| 129091      | amidohydrolase family protein-                                                      | 10           | 62           | 86     | 22          | 29          | 57     |
| 540447      | amino acid permease family protein-                                                 | 20           | 52           | 72     | 39          | 12          | 24     |
| 382021      | amino acid permease family protein-                                                 | 0            | 72           | 100    | 8           | 43          | 84     |
| 495482      | amino acid synthesis family protein-                                                | 1            | 71           | 99     | 16          | 35          | 69     |
| 116951      | AMP-binding enzyme family protein-                                                  | 19           | 53           | 74     | 37          | 14          | 27     |
| 634610      | ankyrin repeats family protein-                                                     | 1            | 71           | 99     | 20          | 31          | 61     |
| 807862      | ankyrin repeats family protein-                                                     | 28           | 44           | 61     | 36          | 15          | 29     |
| 572242      | antibiotic biosynthesis monooxygenase family protein-                               | 5            | 67           | 93     | 25          | 26          | 51     |
| 170113      | antibiotic biosynthesis monooxygenase family protein-                               | 5            | 67           | 93     | 22          | 29          | 57     |
| 494561      | antitoxin of toxin-antitoxin stability system N-terminal family protein-            | 21           | 51           | 71     | 40          | 11          | 22     |
| 779402      | apolipoprotein-III family protein-                                                  | 18           | 54           | 75     | 32          | 19          | 37     |
| 96668       | arc-like DNA binding domain protein-                                                | 43           | 29           | 40     | 46          | 5           | 10     |
| 303210      | archaeal ATPase family protein-                                                     | 36           | 36           | 50     | 42          | 9           | 18     |
| 512809      | aromatic amino acid lyase family protein-                                           | 19           | 53           | 74     | 38          | 13          | 25     |
| 650274      | aspartate 4-decarboxylase-                                                          | 23           | 49           | 68     | 33          | 18          | 35     |
| 701535      | aspartate-alanine antiporter-                                                       | 24           | 48           | 67     | 33          | 18          | 35     |
| 722277      | autotransporter beta-domain protein-                                                | 11           | 61           | 85     | 27          | 24          | 47     |
| 500829      | BAAT / Acyl-CoA thioester hydrolase C terminal family protein-                      | 11           | 61           | 85     | 31          | 20          | 39     |
| 116049      | bacterial extracellular solute-binding family protein-                              | 20           | 52           | 72     | 32          | 19          | 37     |
| 256202      | bacterial group 3 Ig-like domain protein-                                           | 2            | 70           | 97     | 22          | 29          | 57     |
| 389568      | bacterial Ig-like domain family protein-                                            | 1            | 71           | 99     | 27          | 24          | 47     |
| 727321      | bacterial Ig-like domain family protein-                                            | 11           | 61           | 85     | 31          | 20          | 39     |
| 225370      | bacterial Ig-like domain family protein-                                            | 10           | 62           | 86     | 29          | 22          | 43     |
| 390271      | bacterial Ig-like domain family protein-                                            | 13           | 59           | 82     | 28          | 23          | 45     |
| 807740      | bacterial lipid A biosynthesis acyltransferase family protein-                      | 19           | 53           | 74     | 37          | 14          | 27     |
| 187219      | bacterial regulatory, Fis family protein-                                           | 20           | 52           | 72     | 35          | 16          | 31     |
| 805198      | bacterial regulatory, luxR family protein-                                          | 18           | 54           | 75     | 36          | 15          | 29     |
| 121019      | bacterial regulatory, luxR family protein-                                          | 20           | 52           | 72     | 36          | 15          | 29     |
| 570885      | bacterial regulatory, tetR family protein-                                          | 9            | 63           | 88     | 36          | 15          | 29     |
| 258623      | bacterial regulatory, tetR family protein-                                          | 20           | 52           | 72     | 39          | 12          | 24     |
| 135319      | bacterial regulatory, tetR family protein-                                          | 20           | 52           | 72     | 34          | 17          | 33     |
| 511956      | bacterial regulatory, tetR family protein-                                          | 0            | 72           | 100    | 11          | 40          | 78     |
| 352883      | bacterial SH3 domain protein-                                                       | 15           | 57           | 79     | 32          | 19          | 37     |
| 386745      | bacterial transcriptional regulator family protein-                                 | 17           | 55           | 76     | 37          | 14          | 27     |
| 301290      | bacterial transferase hexapeptide family protein-                                   | 43           | 29           | 40     | 50          | 1           | 2      |
| 368640      | bacterial transferase hexapeptide family protein-                                   | 43           | 29           | 40     | 47          | 4           | 8      |
| 440298      | bacterial transferase hexapeptide family protein-                                   | 43           | 29           | 40     | 47          | 4           | 8      |
| 454938      | BCCT transporter family protein-                                                    | 21           | 51           | 71     | 39          | 12          | 24     |
| 1899        | beta-eliminating lyase family protein-                                              | 44           | 28           | 39     | 47          | 4           | 8      |
| 806683      | beta-eliminating lyase family protein-                                              | 44           | 28           | 39     | 47          | 4           | 8      |
| 427106      | beta-ketoacyl synthase, N-terminal domain protein-                                  | 19           | 53           | 74     | 37          | 14          | 27     |
| 807750      | beta-ketoacyl synthase, N-terminal domain protein-                                  | 19           | 53           | 74     | 37          | 14          | 27     |
| 512815      | beta-ketoacyl synthase, N-terminal domain protein-                                  | 20           | 52           | 72     | 37          | 14          | 27     |
| 805287      | beta-lactamase-                                                                     | 34           | 38           | 53     | 49          | 2           | 4      |
| 658764      | binding-protein-dependent transport system inner membrane component family protein- | 10           | 62           | 86     | 22          | 29          | 57     |
| 276166      | BRO family, N-terminal domain protein-                                              | 32           | 40           | 56     | 43          | 8           | 16     |
| 715744      | bypass of Forespore C, N terminal family protein-                                   | 20           | 52           | 72     | 35          | 16          | 31     |
| 655568      | C-5 cytosine-specific DNA methylase family protein-                                 | 27           | 45           | 63     | 43          | 8           | 16     |
| 733163      | capsule polysaccharide biosynthesis family protein-                                 | 47           | 25           | 35     | 51          | 0           | 0      |
| 156422      | carbapenem-associated resistance domain protein-                                    | 14           | 58           | 81     | 34          | 17          | 33     |
| 429309      | carboxymuconolactone decarboxylase family protein-                                  | 1            | 71           | 99     | 16          | 35          | 69     |
| 541836      | carboxymuconolactone decarboxylase family protein-                                  | 3            | 69           | 96     | 16          | 35          | 69     |
| 374679      | catalase-related immune-responsive family protein-                                  | 15           | 57           | 79     | 35          | 16          | 31     |
| 629589      | catalase-related immune-responsive family protein-                                  | 15           | 57           | 79     | 35          | 16          | 31     |
| 447955      | catalase-related immune-responsive family protein-                                  | 44           | 28           | 39     | 47          | 4           | 8      |
| 217537      | cell wall-associated protease domain protein-                                       | 1            | 71           | 99     | 23          | 28          | 55     |
| 110372      | choline/ethanolamine kinase family protein-                                         | 47           | 25           | 35     | 50          | 1           | 2      |
| 49256       | cobQ/CobB/MinD/ParA nucleotide binding domain protein-                              | 29           | 43           | 60     | 44          | 7           | 14     |
| 434782      | conjugal relaxase domain protein-                                                   | 34           | 38           | 53     | 45          | 6           | 12     |
| 381726      | conjugal relaxosome accessory transposon family protein-                            | 28           | 44           | 61     | 44          | 7           | 14     |
| 175329      | conserved hypothetical protein-                                                     | 8            | 64           | 89     | 37          | 14          | 27     |
| 75784       | conserved hypothetical protein-                                                     | 6            | 66           | 92     | 34          | 17          | 33     |
| 806147      | conserved hypothetical protein-                                                     | 6            | 66           | 92     | 34          | 17          | 33     |
| 729735      | conserved hypothetical protein-                                                     | 9            | 63           | 88     | 37          | 14          | 27     |
| 393342      | conserved hypothetical protein-                                                     | 10           | 62           | 86     | 37          | 14          | 27     |
| 33850       | conserved hypothetical protein-                                                     | 12           | 60           | 83     | 38          | 13          | 25     |
| 637764      | conserved hypothetical protein-                                                     | 12           | 60           | 83     | 38          | 13          | 25     |
| 414126      | conserved hypothetical protein-                                                     | 1            | 71           | 99     | 24          | 27          | 53     |
| 783992      | conserved hypothetical protein-                                                     | 1            | 71           | 99     | 24          | 27          | 53     |
| 961         | conserved hypothetical protein-                                                     | 1            | 71           | 99     | 24          | 27          | 53     |
| 230978      | conserved hypothetical protein-                                                     | 13           | 59           | 82     | 38          | 13          | 25     |
| 736339      | conserved hypothetical protein-                                                     | 8            | 64           | 89     | 33          | 18          | 35     |
| 3745        | conserved hypothetical protein-                                                     | 4            | 68           | 94     | 28          | 23          | 45     |
| 90541       | conserved hypothetical protein-                                                     | 13           | 59           | 82     | 37          | 14          | 27     |
| 667923      | conserved hypothetical protein-                                                     | 0            | 72           | 100    | 20          | 31          | 61     |
| 676783      | conserved hypothetical protein-                                                     | 22           | 50           | 69     | 43          | 8           | 16     |
| 514726      | conserved hypothetical protein-                                                     | 15           | 57           | 79     | 38          | 13          | 25     |
| 408000      | conserved hypothetical protein-                                                     | 14           | 58           | 81     | 37          | 14          | 27     |
| 807509      | conserved hypothetical protein-                                                     | 26           | 46           | 64     | 45          | 6           | 12     |
| 448535      | conserved hypothetical protein-                                                     | 11           | 61           | 85     | 34          | 17          | 33     |
| 545732      | conserved hypothetical protein-                                                     | 12           | 60           | 83     | 35          | 16          | 31     |
| 226020      | conserved hypothetical protein-                                                     | 17           | 55           | 76     | 39          | 12          | 24     |
| 202133      | conserved hypothetical protein-                                                     | 3            | 69           | 96     | 24          | 27          | 53     |

|        |                                |    |    |     |    |    |    |
|--------|--------------------------------|----|----|-----|----|----|----|
| 156827 | conserved hypothetical protein | 16 | 56 | 78  | 38 | 13 | 25 |
| 36804  | conserved hypothetical protein | 16 | 56 | 78  | 38 | 13 | 25 |
| 49565  | conserved hypothetical protein | 0  | 72 | 100 | 18 | 33 | 65 |
| 546737 | conserved hypothetical protein | 0  | 72 | 100 | 18 | 33 | 65 |
| 629143 | conserved hypothetical protein | 0  | 72 | 100 | 18 | 33 | 65 |
| 123635 | conserved hypothetical protein | 26 | 46 | 64  | 44 | 7  | 14 |
| 187025 | conserved hypothetical protein | 26 | 46 | 64  | 44 | 7  | 14 |
| 372974 | conserved hypothetical protein | 17 | 55 | 76  | 38 | 13 | 25 |
| 464586 | conserved hypothetical protein | 30 | 42 | 58  | 46 | 5  | 10 |
| 633416 | conserved hypothetical protein | 30 | 42 | 58  | 46 | 5  | 10 |
| 189763 | conserved hypothetical protein | 8  | 64 | 89  | 30 | 21 | 41 |
| 393116 | conserved hypothetical protein | 28 | 44 | 61  | 45 | 6  | 12 |
| 411349 | conserved hypothetical protein | 28 | 44 | 61  | 45 | 6  | 12 |
| 375450 | conserved hypothetical protein | 4  | 68 | 94  | 25 | 26 | 51 |
| 473530 | conserved hypothetical protein | 4  | 68 | 94  | 25 | 26 | 51 |
| 726703 | conserved hypothetical protein | 4  | 68 | 94  | 25 | 26 | 51 |
| 727942 | conserved hypothetical protein | 4  | 68 | 94  | 25 | 26 | 51 |
| 792184 | conserved hypothetical protein | 5  | 67 | 93  | 26 | 25 | 49 |
| 136990 | conserved hypothetical protein | 3  | 69 | 96  | 23 | 28 | 55 |
| 120154 | conserved hypothetical protein | 16 | 56 | 78  | 37 | 14 | 27 |
| 57445  | conserved hypothetical protein | 16 | 56 | 78  | 37 | 14 | 27 |
| 760307 | conserved hypothetical protein | 16 | 56 | 78  | 37 | 14 | 27 |
| 293762 | conserved hypothetical protein | 29 | 43 | 60  | 45 | 6  | 12 |
| 365761 | conserved hypothetical protein | 29 | 43 | 60  | 45 | 6  | 12 |
| 530437 | conserved hypothetical protein | 29 | 43 | 60  | 45 | 6  | 12 |
| 804896 | conserved hypothetical protein | 29 | 43 | 60  | 45 | 6  | 12 |
| 393533 | conserved hypothetical protein | 27 | 45 | 63  | 44 | 7  | 14 |
| 466278 | conserved hypothetical protein | 27 | 45 | 63  | 44 | 7  | 14 |
| 498524 | conserved hypothetical protein | 27 | 45 | 63  | 44 | 7  | 14 |
| 653641 | conserved hypothetical protein | 27 | 45 | 63  | 44 | 7  | 14 |
| 75644  | conserved hypothetical protein | 27 | 45 | 63  | 44 | 7  | 14 |
| 804889 | conserved hypothetical protein | 27 | 45 | 63  | 44 | 7  | 14 |
| 301974 | conserved hypothetical protein | 31 | 41 | 57  | 46 | 5  | 10 |
| 533180 | conserved hypothetical protein | 13 | 59 | 82  | 34 | 17 | 33 |
| 478831 | conserved hypothetical protein | 21 | 51 | 71  | 40 | 11 | 22 |
| 447234 | conserved hypothetical protein | 17 | 55 | 76  | 37 | 14 | 27 |
| 738276 | conserved hypothetical protein | 1  | 71 | 99  | 19 | 32 | 63 |
| 669695 | conserved hypothetical protein | 10 | 62 | 86  | 31 | 20 | 39 |
| 364603 | conserved hypothetical protein | 14 | 58 | 81  | 35 | 16 | 31 |
| 636982 | conserved hypothetical protein | 14 | 58 | 81  | 35 | 16 | 31 |
| 52186  | conserved hypothetical protein | 20 | 52 | 72  | 39 | 12 | 24 |
| 792473 | conserved hypothetical protein | 20 | 52 | 72  | 39 | 12 | 24 |
| 807540 | conserved hypothetical protein | 20 | 52 | 72  | 39 | 12 | 24 |
| 134957 | conserved hypothetical protein | 30 | 42 | 58  | 45 | 6  | 12 |
| 381767 | conserved hypothetical protein | 28 | 44 | 61  | 44 | 7  | 14 |
| 393149 | conserved hypothetical protein | 28 | 44 | 61  | 44 | 7  | 14 |
| 393781 | conserved hypothetical protein | 28 | 44 | 61  | 44 | 7  | 14 |
| 466277 | conserved hypothetical protein | 28 | 44 | 61  | 44 | 7  | 14 |
| 525423 | conserved hypothetical protein | 28 | 44 | 61  | 44 | 7  | 14 |
| 568807 | conserved hypothetical protein | 28 | 44 | 61  | 44 | 7  | 14 |
| 593685 | conserved hypothetical protein | 28 | 44 | 61  | 44 | 7  | 14 |
| 654152 | conserved hypothetical protein | 28 | 44 | 61  | 44 | 7  | 14 |
| 692713 | conserved hypothetical protein | 28 | 44 | 61  | 44 | 7  | 14 |
| 721884 | conserved hypothetical protein | 28 | 44 | 61  | 44 | 7  | 14 |
| 754952 | conserved hypothetical protein | 28 | 44 | 61  | 44 | 7  | 14 |
| 806724 | conserved hypothetical protein | 28 | 44 | 61  | 44 | 7  | 14 |
| 452043 | conserved hypothetical protein | 9  | 63 | 88  | 30 | 21 | 41 |
| 563378 | conserved hypothetical protein | 46 | 26 | 36  | 51 | 0  | 0  |
| 49436  | conserved hypothetical protein | 18 | 54 | 75  | 37 | 14 | 27 |
| 724670 | conserved hypothetical protein | 18 | 54 | 75  | 37 | 14 | 27 |
| 370880 | conserved hypothetical protein | 10 | 62 | 86  | 30 | 21 | 41 |
| 431013 | conserved hypothetical protein | 10 | 62 | 86  | 30 | 21 | 41 |
| 304557 | conserved hypothetical protein | 14 | 58 | 81  | 34 | 17 | 33 |
| 619121 | conserved hypothetical protein | 1  | 71 | 99  | 18 | 33 | 65 |
| 341276 | conserved hypothetical protein | 21 | 51 | 71  | 39 | 12 | 24 |
| 522759 | conserved hypothetical protein | 21 | 51 | 71  | 39 | 12 | 24 |
| 67646  | conserved hypothetical protein | 21 | 51 | 71  | 39 | 12 | 24 |
| 563114 | conserved hypothetical protein | 43 | 29 | 40  | 50 | 1  | 2  |
| 301332 | conserved hypothetical protein | 29 | 43 | 60  | 44 | 7  | 14 |
| 366041 | conserved hypothetical protein | 29 | 43 | 60  | 44 | 7  | 14 |
| 385160 | conserved hypothetical protein | 29 | 43 | 60  | 44 | 7  | 14 |
| 412170 | conserved hypothetical protein | 29 | 43 | 60  | 44 | 7  | 14 |
| 434779 | conserved hypothetical protein | 29 | 43 | 60  | 44 | 7  | 14 |
| 495948 | conserved hypothetical protein | 29 | 43 | 60  | 44 | 7  | 14 |
| 636400 | conserved hypothetical protein | 29 | 43 | 60  | 44 | 7  | 14 |
| 81705  | conserved hypothetical protein | 29 | 43 | 60  | 44 | 7  | 14 |
| 364626 | conserved hypothetical protein | 5  | 67 | 93  | 24 | 27 | 53 |
| 771818 | conserved hypothetical protein | 5  | 67 | 93  | 24 | 27 | 53 |
| 789688 | conserved hypothetical protein | 5  | 67 | 93  | 24 | 27 | 53 |
| 636420 | conserved hypothetical protein | 33 | 39 | 54  | 46 | 5  | 10 |
| 194843 | conserved hypothetical protein | 28 | 44 | 61  | 43 | 8  | 16 |
| 433377 | conserved hypothetical protein | 28 | 44 | 61  | 43 | 8  | 16 |
| 705498 | conserved hypothetical protein | 28 | 44 | 61  | 43 | 8  | 16 |
| 629765 | conserved hypothetical protein | 6  | 66 | 92  | 25 | 26 | 51 |
| 28328  | conserved hypothetical protein | 20 | 52 | 72  | 38 | 13 | 25 |
| 308608 | conserved hypothetical protein | 20 | 52 | 72  | 38 | 13 | 25 |
| 579355 | conserved hypothetical protein | 20 | 52 | 72  | 38 | 13 | 25 |
| 640594 | conserved hypothetical protein | 20 | 52 | 72  | 38 | 13 | 25 |
| 670819 | conserved hypothetical protein | 20 | 52 | 72  | 38 | 13 | 25 |
| 751178 | conserved hypothetical protein | 20 | 52 | 72  | 38 | 13 | 25 |
| 193213 | conserved hypothetical protein | 23 | 49 | 68  | 40 | 11 | 22 |
| 692158 | conserved hypothetical protein | 23 | 49 | 68  | 40 | 11 | 22 |
| 229134 | conserved hypothetical protein | 19 | 53 | 74  | 37 | 14 | 27 |
| 533099 | conserved hypothetical protein | 19 | 53 | 74  | 37 | 14 | 27 |
| 805420 | conserved hypothetical protein | 19 | 53 | 74  | 37 | 14 | 27 |
| 467109 | conserved hypothetical protein | 32 | 40 | 56  | 45 | 6  | 12 |
| 538871 | conserved hypothetical protein | 32 | 40 | 56  | 45 | 6  | 12 |
| 636359 | conserved hypothetical protein | 32 | 40 | 56  | 45 | 6  | 12 |
| 519171 | conserved hypothetical protein | 22 | 50 | 69  | 39 | 12 | 24 |
| 671701 | conserved hypothetical protein | 22 | 50 | 69  | 39 | 12 | 24 |
| 187359 | conserved hypothetical protein | 10 | 62 | 86  | 29 | 22 | 43 |
| 341066 | conserved hypothetical protein | 1  | 71 | 99  | 17 | 34 | 67 |
| 409536 | conserved hypothetical protein | 1  | 71 | 99  | 17 | 34 | 67 |
| 139242 | conserved hypothetical protein | 4  | 68 | 94  | 22 | 29 | 57 |
| 389976 | conserved hypothetical protein | 4  | 68 | 94  | 22 | 29 | 57 |
| 808261 | conserved hypothetical protein | 4  | 68 | 94  | 22 | 29 | 57 |
| 301242 | conserved hypothetical protein | 30 | 42 | 58  | 44 | 7  | 14 |
| 301321 | conserved hypothetical protein | 30 | 42 | 58  | 44 | 7  | 14 |
| 381765 | conserved hypothetical protein | 30 | 42 | 58  | 44 | 7  | 14 |

|        |                                |    |    |     |    |    |    |
|--------|--------------------------------|----|----|-----|----|----|----|
| 743074 | conserved hypothetical protein | 30 | 42 | 58  | 44 | 7  | 14 |
| 763013 | conserved hypothetical protein | 30 | 42 | 58  | 44 | 7  | 14 |
| 393653 | conserved hypothetical protein | 21 | 51 | 71  | 38 | 13 | 25 |
| 436790 | conserved hypothetical protein | 21 | 51 | 71  | 38 | 13 | 25 |
| 724671 | conserved hypothetical protein | 21 | 51 | 71  | 38 | 13 | 25 |
| 714572 | conserved hypothetical protein | 7  | 65 | 90  | 26 | 25 | 49 |
| 612306 | conserved hypothetical protein | 9  | 63 | 88  | 28 | 23 | 45 |
| 301285 | conserved hypothetical protein | 31 | 41 | 57  | 44 | 7  | 14 |
| 523681 | conserved hypothetical protein | 31 | 41 | 57  | 44 | 7  | 14 |
| 807493 | conserved hypothetical protein | 31 | 41 | 57  | 44 | 7  | 14 |
| 807500 | conserved hypothetical protein | 31 | 41 | 57  | 44 | 7  | 14 |
| 443917 | conserved hypothetical protein | 29 | 43 | 60  | 43 | 8  | 16 |
| 16931  | conserved hypothetical protein | 35 | 37 | 51  | 46 | 5  | 10 |
| 393530 | conserved hypothetical protein | 27 | 45 | 63  | 42 | 9  | 18 |
| 724793 | conserved hypothetical protein | 6  | 66 | 92  | 24 | 27 | 53 |
| 360339 | conserved hypothetical protein | 33 | 39 | 54  | 45 | 6  | 12 |
| 381731 | conserved hypothetical protein | 33 | 39 | 54  | 45 | 6  | 12 |
| 381774 | conserved hypothetical protein | 33 | 39 | 54  | 45 | 6  | 12 |
| 681555 | conserved hypothetical protein | 33 | 39 | 54  | 45 | 6  | 12 |
| 685804 | conserved hypothetical protein | 33 | 39 | 54  | 45 | 6  | 12 |
| 701454 | conserved hypothetical protein | 33 | 39 | 54  | 45 | 6  | 12 |
| 763217 | conserved hypothetical protein | 26 | 46 | 64  | 41 | 10 | 20 |
| 311042 | conserved hypothetical protein | 28 | 44 | 61  | 42 | 9  | 18 |
| 385580 | conserved hypothetical protein | 28 | 44 | 61  | 42 | 9  | 18 |
| 131277 | conserved hypothetical protein | 0  | 72 | 100 | 14 | 37 | 73 |
| 572946 | conserved hypothetical protein | 5  | 67 | 93  | 23 | 28 | 55 |
| 161833 | conserved hypothetical protein | 8  | 64 | 89  | 26 | 25 | 49 |
| 122373 | conserved hypothetical protein | 1  | 71 | 99  | 16 | 35 | 69 |
| 147332 | conserved hypothetical protein | 1  | 71 | 99  | 16 | 35 | 69 |
| 160217 | conserved hypothetical protein | 1  | 71 | 99  | 16 | 35 | 69 |
| 183097 | conserved hypothetical protein | 1  | 71 | 99  | 16 | 35 | 69 |
| 344128 | conserved hypothetical protein | 1  | 71 | 99  | 16 | 35 | 69 |
| 422852 | conserved hypothetical protein | 1  | 71 | 99  | 16 | 35 | 69 |
| 440185 | conserved hypothetical protein | 1  | 71 | 99  | 16 | 35 | 69 |
| 444134 | conserved hypothetical protein | 1  | 71 | 99  | 16 | 35 | 69 |
| 495476 | conserved hypothetical protein | 1  | 71 | 99  | 16 | 35 | 69 |
| 574684 | conserved hypothetical protein | 1  | 71 | 99  | 16 | 35 | 69 |
| 696575 | conserved hypothetical protein | 1  | 71 | 99  | 16 | 35 | 69 |
| 696669 | conserved hypothetical protein | 1  | 71 | 99  | 16 | 35 | 69 |
| 720075 | conserved hypothetical protein | 1  | 71 | 99  | 16 | 35 | 69 |
| 724693 | conserved hypothetical protein | 1  | 71 | 99  | 16 | 35 | 69 |
| 728639 | conserved hypothetical protein | 1  | 71 | 99  | 16 | 35 | 69 |
| 738879 | conserved hypothetical protein | 1  | 71 | 99  | 16 | 35 | 69 |
| 746620 | conserved hypothetical protein | 1  | 71 | 99  | 16 | 35 | 69 |
| 751239 | conserved hypothetical protein | 1  | 71 | 99  | 16 | 35 | 69 |
| 754223 | conserved hypothetical protein | 1  | 71 | 99  | 16 | 35 | 69 |
| 762552 | conserved hypothetical protein | 1  | 71 | 99  | 16 | 35 | 69 |
| 15761  | conserved hypothetical protein | 32 | 40 | 56  | 44 | 7  | 14 |
| 197054 | conserved hypothetical protein | 32 | 40 | 56  | 44 | 7  | 14 |
| 327491 | conserved hypothetical protein | 32 | 40 | 56  | 44 | 7  | 14 |
| 41443  | conserved hypothetical protein | 32 | 40 | 56  | 44 | 7  | 14 |
| 420385 | conserved hypothetical protein | 32 | 40 | 56  | 44 | 7  | 14 |
| 575247 | conserved hypothetical protein | 32 | 40 | 56  | 44 | 7  | 14 |
| 565022 | conserved hypothetical protein | 17 | 55 | 76  | 34 | 17 | 33 |
| 381753 | conserved hypothetical protein | 34 | 38 | 53  | 45 | 6  | 12 |
| 384713 | conserved hypothetical protein | 34 | 38 | 53  | 45 | 6  | 12 |
| 530810 | conserved hypothetical protein | 27 | 45 | 63  | 41 | 10 | 20 |
| 522763 | conserved hypothetical protein | 23 | 49 | 68  | 38 | 13 | 25 |
| 724691 | conserved hypothetical protein | 0  | 72 | 100 | 13 | 38 | 75 |
| 384722 | conserved hypothetical protein | 33 | 39 | 54  | 44 | 7  | 14 |
| 151315 | conserved hypothetical protein | 2  | 70 | 97  | 17 | 34 | 67 |
| 257425 | conserved hypothetical protein | 2  | 70 | 97  | 17 | 34 | 67 |
| 263176 | conserved hypothetical protein | 2  | 70 | 97  | 17 | 34 | 67 |
| 392566 | conserved hypothetical protein | 2  | 70 | 97  | 17 | 34 | 67 |
| 700712 | conserved hypothetical protein | 2  | 70 | 97  | 17 | 34 | 67 |
| 727346 | conserved hypothetical protein | 11 | 61 | 85  | 28 | 23 | 45 |
| 80580  | conserved hypothetical protein | 11 | 61 | 85  | 28 | 23 | 45 |
| 573648 | conserved hypothetical protein | 4  | 68 | 94  | 20 | 31 | 61 |
| 767529 | conserved hypothetical protein | 4  | 68 | 94  | 20 | 31 | 61 |
| 392572 | conserved hypothetical protein | 1  | 71 | 99  | 15 | 36 | 71 |
| 514016 | conserved hypothetical protein | 1  | 71 | 99  | 15 | 36 | 71 |
| 791781 | conserved hypothetical protein | 1  | 71 | 99  | 15 | 36 | 71 |
| 103181 | conserved hypothetical protein | 32 | 40 | 56  | 43 | 8  | 16 |
| 233840 | conserved hypothetical protein | 32 | 40 | 56  | 43 | 8  | 16 |
| 301812 | conserved hypothetical protein | 32 | 40 | 56  | 43 | 8  | 16 |
| 318814 | conserved hypothetical protein | 32 | 40 | 56  | 43 | 8  | 16 |
| 669584 | conserved hypothetical protein | 32 | 40 | 56  | 43 | 8  | 16 |
| 707346 | conserved hypothetical protein | 32 | 40 | 56  | 43 | 8  | 16 |
| 755759 | conserved hypothetical protein | 32 | 40 | 56  | 43 | 8  | 16 |
| 714866 | conserved hypothetical protein | 28 | 44 | 61  | 41 | 10 | 20 |
| 739206 | conserved hypothetical protein | 28 | 44 | 61  | 41 | 10 | 20 |
| 737906 | conserved hypothetical protein | 36 | 36 | 50  | 45 | 6  | 12 |
| 364293 | conserved hypothetical protein | 25 | 47 | 65  | 39 | 12 | 24 |
| 382490 | conserved hypothetical protein | 25 | 47 | 65  | 39 | 12 | 24 |
| 601625 | conserved hypothetical protein | 25 | 47 | 65  | 39 | 12 | 24 |
| 278202 | conserved hypothetical protein | 27 | 45 | 63  | 40 | 11 | 22 |
| 799674 | conserved hypothetical protein | 27 | 45 | 63  | 40 | 11 | 22 |
| 195582 | conserved hypothetical protein | 5  | 67 | 93  | 21 | 30 | 59 |
| 196328 | conserved hypothetical protein | 24 | 48 | 67  | 38 | 13 | 25 |
| 486251 | conserved hypothetical protein | 24 | 48 | 67  | 38 | 13 | 25 |
| 222396 | conserved hypothetical protein | 43 | 29 | 40  | 48 | 3  | 6  |
| 365985 | conserved hypothetical protein | 34 | 38 | 53  | 44 | 7  | 14 |
| 317042 | conserved hypothetical protein | 14 | 58 | 81  | 30 | 21 | 41 |
| 322183 | conserved hypothetical protein | 14 | 58 | 81  | 30 | 21 | 41 |
| 383179 | conserved hypothetical protein | 14 | 58 | 81  | 30 | 21 | 41 |
| 643027 | conserved hypothetical protein | 26 | 46 | 64  | 39 | 12 | 24 |
| 783444 | conserved hypothetical protein | 23 | 49 | 68  | 37 | 14 | 27 |
| 80579  | conserved hypothetical protein | 23 | 49 | 68  | 37 | 14 | 27 |
| 243848 | conserved hypothetical protein | 11 | 61 | 85  | 27 | 24 | 47 |
| 695155 | conserved hypothetical protein | 33 | 39 | 54  | 43 | 8  | 16 |
| 574620 | conserved hypothetical protein | 31 | 41 | 57  | 42 | 9  | 18 |
| 364436 | conserved hypothetical protein | 10 | 62 | 86  | 26 | 25 | 49 |
| 672855 | conserved hypothetical protein | 10 | 62 | 86  | 26 | 25 | 49 |
| 197791 | conserved hypothetical protein | 30 | 42 | 58  | 41 | 10 | 20 |
| 532080 | conserved hypothetical protein | 30 | 42 | 58  | 41 | 10 | 20 |
| 805196 | conserved hypothetical protein | 30 | 42 | 58  | 41 | 10 | 20 |
| 70386  | conserved hypothetical protein | 35 | 37 | 51  | 44 | 7  | 14 |
| 785970 | conserved hypothetical protein | 5  | 67 | 93  | 20 | 31 | 61 |
| 807165 | conserved hypothetical protein | 5  | 67 | 93  | 20 | 31 | 61 |

|        |                                |    |    |     |    |    |    |
|--------|--------------------------------|----|----|-----|----|----|----|
| 447842 | conserved hypothetical protein | 20 | 52 | 72  | 34 | 17 | 33 |
| 715886 | conserved hypothetical protein | 15 | 57 | 79  | 30 | 21 | 41 |
| 732223 | conserved hypothetical protein | 15 | 57 | 79  | 30 | 21 | 41 |
| 336934 | conserved hypothetical protein | 3  | 69 | 96  | 17 | 34 | 67 |
| 160113 | conserved hypothetical protein | 2  | 70 | 97  | 15 | 36 | 71 |
| 278206 | conserved hypothetical protein | 2  | 70 | 97  | 15 | 36 | 71 |
| 501562 | conserved hypothetical protein | 2  | 70 | 97  | 15 | 36 | 71 |
| 561452 | conserved hypothetical protein | 2  | 70 | 97  | 15 | 36 | 71 |
| 724660 | conserved hypothetical protein | 2  | 70 | 97  | 15 | 36 | 71 |
| 151832 | conserved hypothetical protein | 4  | 68 | 94  | 18 | 33 | 65 |
| 199877 | conserved hypothetical protein | 4  | 68 | 94  | 18 | 33 | 65 |
| 477594 | conserved hypothetical protein | 4  | 68 | 94  | 18 | 33 | 65 |
| 562995 | conserved hypothetical protein | 4  | 68 | 94  | 18 | 33 | 65 |
| 644849 | conserved hypothetical protein | 4  | 68 | 94  | 18 | 33 | 65 |
| 127370 | conserved hypothetical protein | 32 | 40 | 56  | 42 | 9  | 18 |
| 20940  | conserved hypothetical protein | 32 | 40 | 56  | 42 | 9  | 18 |
| 318800 | conserved hypothetical protein | 32 | 40 | 56  | 42 | 9  | 18 |
| 318806 | conserved hypothetical protein | 32 | 40 | 56  | 42 | 9  | 18 |
| 318821 | conserved hypothetical protein | 32 | 40 | 56  | 42 | 9  | 18 |
| 41462  | conserved hypothetical protein | 32 | 40 | 56  | 42 | 9  | 18 |
| 428971 | conserved hypothetical protein | 32 | 40 | 56  | 42 | 9  | 18 |
| 439610 | conserved hypothetical protein | 32 | 40 | 56  | 42 | 9  | 18 |
| 688438 | conserved hypothetical protein | 32 | 40 | 56  | 42 | 9  | 18 |
| 721310 | conserved hypothetical protein | 32 | 40 | 56  | 42 | 9  | 18 |
| 806955 | conserved hypothetical protein | 32 | 40 | 56  | 42 | 9  | 18 |
| 98839  | conserved hypothetical protein | 32 | 40 | 56  | 42 | 9  | 18 |
| 229890 | conserved hypothetical protein | 0  | 72 | 100 | 11 | 40 | 78 |
| 278228 | conserved hypothetical protein | 0  | 72 | 100 | 11 | 40 | 78 |
| 531549 | conserved hypothetical protein | 38 | 34 | 47  | 45 | 6  | 12 |
| 589537 | conserved hypothetical protein | 13 | 59 | 82  | 28 | 23 | 45 |
| 804586 | conserved hypothetical protein | 45 | 27 | 38  | 48 | 3  | 6  |
| 415852 | conserved hypothetical protein | 18 | 54 | 75  | 32 | 19 | 37 |
| 538549 | conserved hypothetical protein | 47 | 25 | 35  | 49 | 2  | 4  |
| 194838 | conserved hypothetical protein | 31 | 41 | 57  | 41 | 10 | 20 |
| 724672 | conserved hypothetical protein | 31 | 41 | 57  | 41 | 10 | 20 |
| 302701 | conserved hypothetical protein | 29 | 43 | 60  | 40 | 11 | 22 |
| 354315 | conserved hypothetical protein | 29 | 43 | 60  | 40 | 11 | 22 |
| 581876 | conserved hypothetical protein | 21 | 51 | 71  | 34 | 17 | 33 |
| 671565 | conserved hypothetical protein | 21 | 51 | 71  | 34 | 17 | 33 |
| 503236 | conserved hypothetical protein | 30 | 42 | 58  | 40 | 11 | 22 |
| 806136 | conserved hypothetical protein | 30 | 42 | 58  | 40 | 11 | 22 |
| 143371 | conserved hypothetical protein | 27 | 45 | 63  | 38 | 13 | 25 |
| 256330 | conserved hypothetical protein | 27 | 45 | 63  | 38 | 13 | 25 |
| 131052 | conserved hypothetical protein | 3  | 69 | 96  | 16 | 35 | 69 |
| 273780 | conserved hypothetical protein | 3  | 69 | 96  | 16 | 35 | 69 |
| 412167 | conserved hypothetical protein | 3  | 69 | 96  | 16 | 35 | 69 |
| 416304 | conserved hypothetical protein | 3  | 69 | 96  | 16 | 35 | 69 |
| 460631 | conserved hypothetical protein | 3  | 69 | 96  | 16 | 35 | 69 |
| 509468 | conserved hypothetical protein | 3  | 69 | 96  | 16 | 35 | 69 |
| 509469 | conserved hypothetical protein | 3  | 69 | 96  | 16 | 35 | 69 |
| 696657 | conserved hypothetical protein | 3  | 69 | 96  | 16 | 35 | 69 |
| 55652  | conserved hypothetical protein | 12 | 60 | 83  | 26 | 25 | 49 |
| 371042 | conserved hypothetical protein | 32 | 40 | 56  | 41 | 10 | 20 |
| 37700  | conserved hypothetical protein | 32 | 40 | 56  | 41 | 10 | 20 |
| 445146 | conserved hypothetical protein | 32 | 40 | 56  | 41 | 10 | 20 |
| 474389 | conserved hypothetical protein | 32 | 40 | 56  | 41 | 10 | 20 |
| 486249 | conserved hypothetical protein | 32 | 40 | 56  | 41 | 10 | 20 |
| 680510 | conserved hypothetical protein | 32 | 40 | 56  | 41 | 10 | 20 |
| 99544  | conserved hypothetical protein | 32 | 40 | 56  | 41 | 10 | 20 |
| 572950 | conserved hypothetical protein | 6  | 66 | 92  | 20 | 31 | 61 |
| 807168 | conserved hypothetical protein | 6  | 66 | 92  | 20 | 31 | 61 |
| 202366 | conserved hypothetical protein | 0  | 72 | 100 | 10 | 41 | 80 |
| 528055 | conserved hypothetical protein | 0  | 72 | 100 | 10 | 41 | 80 |
| 418765 | conserved hypothetical protein | 5  | 67 | 93  | 18 | 33 | 65 |
| 714569 | conserved hypothetical protein | 5  | 67 | 93  | 18 | 33 | 65 |
| 806950 | conserved hypothetical protein | 36 | 36 | 50  | 43 | 8  | 16 |
| 49963  | conserved hypothetical protein | 44 | 28 | 39  | 47 | 4  | 8  |
| 712522 | conserved hypothetical protein | 16 | 56 | 78  | 29 | 22 | 43 |
| 318785 | conserved hypothetical protein | 32 | 40 | 56  | 40 | 11 | 22 |
| 764514 | conserved hypothetical protein | 32 | 40 | 56  | 40 | 11 | 22 |
| 806969 | conserved hypothetical protein | 32 | 40 | 56  | 40 | 11 | 22 |
| 98825  | conserved hypothetical protein | 32 | 40 | 56  | 40 | 11 | 22 |
| 256318 | conserved hypothetical protein | 29 | 43 | 60  | 38 | 13 | 25 |
| 296092 | conserved hypothetical protein | 29 | 43 | 60  | 38 | 13 | 25 |
| 323736 | conserved hypothetical protein | 29 | 43 | 60  | 38 | 13 | 25 |
| 513992 | conserved hypothetical protein | 29 | 43 | 60  | 38 | 13 | 25 |
| 724666 | conserved hypothetical protein | 22 | 50 | 69  | 33 | 18 | 35 |
| 397744 | conserved hypothetical protein | 0  | 72 | 100 | 9  | 42 | 82 |
| 696673 | conserved hypothetical protein | 0  | 72 | 100 | 9  | 42 | 82 |
| 266613 | conserved hypothetical protein | 31 | 41 | 57  | 39 | 12 | 24 |
| 266614 | conserved hypothetical protein | 31 | 41 | 57  | 39 | 12 | 24 |
| 714878 | conserved hypothetical protein | 31 | 41 | 57  | 39 | 12 | 24 |
| 714879 | conserved hypothetical protein | 31 | 41 | 57  | 39 | 12 | 24 |
| 747562 | conserved hypothetical protein | 31 | 41 | 57  | 39 | 12 | 24 |
| 806965 | conserved hypothetical protein | 31 | 41 | 57  | 39 | 12 | 24 |
| 95312  | conserved hypothetical protein | 31 | 41 | 57  | 39 | 12 | 24 |
| 724663 | conserved hypothetical protein | 9  | 63 | 88  | 22 | 29 | 57 |
| 727332 | conserved hypothetical protein | 9  | 63 | 88  | 22 | 29 | 57 |
| 732219 | conserved hypothetical protein | 9  | 63 | 88  | 22 | 29 | 57 |
| 792006 | conserved hypothetical protein | 9  | 63 | 88  | 22 | 29 | 57 |
| 257915 | conserved hypothetical protein | 16 | 56 | 78  | 28 | 23 | 45 |
| 627352 | conserved hypothetical protein | 2  | 70 | 97  | 13 | 38 | 75 |
| 777711 | conserved hypothetical protein | 33 | 39 | 54  | 40 | 11 | 22 |
| 804011 | conserved hypothetical protein | 10 | 62 | 86  | 22 | 29 | 57 |
| 395008 | conserved hypothetical protein | 19 | 53 | 74  | 30 | 21 | 41 |
| 419668 | conserved hypothetical protein | 21 | 51 | 71  | 32 | 19 | 37 |
| 400639 | conserved hypothetical protein | 32 | 40 | 56  | 39 | 12 | 24 |
| 40081  | conserved hypothetical protein | 23 | 49 | 68  | 33 | 18 | 35 |
| 727345 | conserved hypothetical protein | 23 | 49 | 68  | 33 | 18 | 35 |
| 55715  | conserved hypothetical protein | 27 | 45 | 63  | 36 | 15 | 29 |
| 429785 | conserved hypothetical protein | 43 | 29 | 40  | 45 | 6  | 12 |
| 666158 | conserved hypothetical protein | 55 | 17 | 24  | 50 | 1  | 2  |
| 785001 | conserved hypothetical protein | 5  | 67 | 93  | 16 | 35 | 69 |
| 126777 | conserved hypothetical protein | 0  | 72 | 100 | 8  | 43 | 84 |
| 144362 | conserved hypothetical protein | 0  | 72 | 100 | 8  | 43 | 84 |
| 257909 | conserved hypothetical protein | 0  | 72 | 100 | 8  | 43 | 84 |
| 730136 | conserved hypothetical protein | 0  | 72 | 100 | 8  | 43 | 84 |
| 778961 | conserved hypothetical protein | 0  | 72 | 100 | 8  | 43 | 84 |
| 589808 | conserved hypothetical protein | 1  | 71 | 99  | 10 | 41 | 80 |

|        |                                                                            |    |    |     |    |    |    |
|--------|----------------------------------------------------------------------------|----|----|-----|----|----|----|
| 730135 | conserved hypothetical protein-                                            | 1  | 71 | 99  | 10 | 41 | 80 |
| 138000 | conserved hypothetical protein-                                            | 3  | 69 | 96  | 13 | 38 | 75 |
| 396612 | conserved hypothetical protein-                                            | 3  | 69 | 96  | 13 | 38 | 75 |
| 629764 | conserved hypothetical protein-                                            | 3  | 69 | 96  | 13 | 38 | 75 |
| 682159 | conserved hypothetical protein-                                            | 2  | 70 | 97  | 12 | 39 | 76 |
| 289865 | conserved hypothetical protein-                                            | 21 | 51 | 71  | 31 | 20 | 39 |
| 477633 | conserved hypothetical protein-                                            | 21 | 51 | 71  | 31 | 20 | 39 |
| 646386 | conserved hypothetical protein-                                            | 21 | 51 | 71  | 31 | 20 | 39 |
| 104754 | conserved hypothetical protein-                                            | 31 | 41 | 57  | 38 | 13 | 25 |
| 365718 | conserved hypothetical protein-                                            | 31 | 41 | 57  | 38 | 13 | 25 |
| 242373 | conserved hypothetical protein-                                            | 40 | 32 | 44  | 43 | 8  | 16 |
| 653730 | conserved hypothetical protein-                                            | 40 | 32 | 44  | 43 | 8  | 16 |
| 764640 | conserved hypothetical protein-                                            | 40 | 32 | 44  | 43 | 8  | 16 |
| 804531 | conserved hypothetical protein-                                            | 40 | 32 | 44  | 43 | 8  | 16 |
| 397481 | conserved hypothetical protein-                                            | 23 | 49 | 68  | 32 | 19 | 37 |
| 509482 | conserved hypothetical protein-                                            | 23 | 49 | 68  | 32 | 19 | 37 |
| 191314 | cro/C1-type HTH DNA-binding domain protein-                                | 16 | 56 | 78  | 33 | 18 | 35 |
| 380213 | CSLREA domain protein-                                                     | 21 | 51 | 71  | 35 | 16 | 31 |
| 496289 | CSLREA domain protein-                                                     | 1  | 71 | 99  | 12 | 39 | 76 |
| 671084 | CSLREA domain protein-                                                     | 1  | 71 | 99  | 12 | 39 | 76 |
| 684755 | CSLREA domain protein-                                                     | 1  | 71 | 99  | 12 | 39 | 76 |
| 458411 | CSLREA domain protein-                                                     | 29 | 43 | 60  | 37 | 14 | 27 |
| 504091 | cytidine and deoxycytidylate deaminase zinc-binding region family protein- | 1  | 71 | 99  | 19 | 32 | 63 |
| 197235 | cytidyllyltransferase family protein-                                      | 45 | 27 | 38  | 51 | 0  | 0  |
| 135785 | D-alanyl-D-alanine carboxypeptidase family protein-                        | 1  | 71 | 99  | 18 | 33 | 65 |
| 805156 | D-isomer specific 2-hydroxyacid dehydrogenase, NAD binding domain protein- | 17 | 55 | 76  | 37 | 14 | 27 |
| 49957  | D12 class N6 adenine-specific DNA methyltransferase family protein-        | 24 | 48 | 67  | 39 | 12 | 24 |
| 647825 | demethylmenaquinone methyltransferase family protein-                      | 17 | 55 | 76  | 37 | 14 | 27 |
| 393091 | dihydropterolate synthase-                                                 | 31 | 41 | 57  | 41 | 10 | 20 |
| 620485 | DJ-1/Pfpi family protein-                                                  | 14 | 58 | 81  | 37 | 14 | 27 |
| 170208 | DNA binding , excisionase family domain protein-                           | 21 | 51 | 71  | 38 | 13 | 25 |
| 103180 | dnaB-like helicase C terminal domain protein-                              | 32 | 40 | 56  | 42 | 9  | 18 |
| 695176 | dnaB-like helicase C terminal domain protein-                              | 32 | 40 | 56  | 42 | 9  | 18 |
| 624228 | dnaI domain protein-                                                       | 30 | 42 | 58  | 44 | 7  | 14 |
| 182554 | eamA-like transporter family protein-                                      | 21 | 51 | 71  | 35 | 16 | 31 |
| 174334 | efflux transporter, outer membrane factor (OMF) lipo, NodD family protein- | 10 | 62 | 86  | 31 | 20 | 39 |
| 356765 | efflux transporter, outer membrane factor (OMF) lipo, NodD family protein- | 14 | 58 | 81  | 35 | 16 | 31 |
| 229167 | endoribonuclease L-PSP family protein-                                     | 11 | 61 | 85  | 31 | 20 | 39 |
| 19439  | enoyl-(Acyl carrier ) reductase family protein-                            | 44 | 28 | 39  | 48 | 3  | 6  |
| 184494 | enoyl-(Acyl carrier ) reductase family protein-                            | 45 | 27 | 38  | 48 | 3  | 6  |
| 539482 | esterase-                                                                  | 14 | 58 | 81  | 27 | 24 | 47 |
| 710653 | ethanolamine utilization EutQ family protein-                              | 20 | 52 | 72  | 34 | 17 | 33 |
| 804738 | exonuclease RNase T and DNA polymerase III domain protein-                 | 25 | 47 | 65  | 39 | 12 | 24 |
| 807481 | F plasmid transfer operon family protein-                                  | 28 | 44 | 61  | 43 | 8  | 16 |
| 807748 | fabA-like domain protein-                                                  | 19 | 53 | 74  | 37 | 14 | 27 |
| 708223 | FAD binding domain protein-                                                | 19 | 53 | 74  | 37 | 14 | 27 |
| 374387 | FAD dependent oxidoreductase family protein-                               | 9  | 63 | 88  | 35 | 16 | 31 |
| 491524 | FAD dependent oxidoreductase family protein-                               | 21 | 51 | 71  | 39 | 12 | 24 |
| 741974 | FAD dependent oxidoreductase family protein-                               | 20 | 52 | 72  | 34 | 17 | 33 |
| 570697 | fecR family protein-                                                       | 11 | 61 | 85  | 30 | 21 | 41 |
| 439424 | filamentous hemagglutinin family N-terminal domain protein-                | 30 | 42 | 58  | 43 | 8  | 16 |
| 705974 | fimbrial protein-                                                          | 36 | 36 | 50  | 42 | 9  | 18 |
| 102438 | flagellar system-associated repeat family protein-                         | 1  | 71 | 99  | 24 | 27 | 53 |
| 791818 | flagellar system-associated repeat family protein-                         | 6  | 66 | 92  | 23 | 28 | 55 |
| 676447 | flagellar system-associated repeat family protein-                         | 12 | 60 | 83  | 27 | 24 | 47 |
| 551083 | flagellar system-associated repeat family protein-                         | 10 | 62 | 86  | 25 | 26 | 51 |
| 224897 | flagellar system-associated repeat family protein-                         | 10 | 62 | 86  | 24 | 27 | 53 |
| 449706 | flagellar system-associated repeat family protein-                         | 32 | 40 | 56  | 40 | 11 | 22 |
| 266529 | flagellar system-associated repeat family protein-                         | 16 | 56 | 78  | 27 | 24 | 47 |
| 343959 | flagellar system-associated repeat family protein-                         | 31 | 41 | 57  | 38 | 13 | 25 |
| 188298 | gene 25-like lysozyme family protein-                                      | 6  | 66 | 92  | 23 | 28 | 55 |
| 282787 | glycosyl transferase 2 family protein-                                     | 1  | 71 | 99  | 24 | 27 | 53 |
| 231251 | glycosyl transferase 2 family protein-                                     | 20 | 52 | 72  | 37 | 14 | 27 |
| 428297 | glycosyl transferase 4 family protein-                                     | 43 | 29 | 40  | 50 | 1  | 2  |
| 192732 | glycosyl transferases group 1 family protein-                              | 1  | 71 | 99  | 24 | 27 | 53 |
| 188030 | glycosyl transferases group 1 family protein-                              | 25 | 47 | 65  | 43 | 8  | 16 |
| 74448  | glycosyl transferases group 1 family protein-                              | 47 | 25 | 35  | 51 | 0  | 0  |
| 806667 | glycosyl transferases group 1 family protein-                              | 44 | 28 | 39  | 50 | 1  | 2  |
| 492219 | glycosyltransferase 25 family protein-                                     | 24 | 48 | 67  | 40 | 11 | 22 |
| 467384 | glycosyltransferase Family 4 family protein-                               | 2  | 70 | 97  | 27 | 24 | 47 |
| 436519 | H-NS histone family protein-                                               | 29 | 43 | 60  | 43 | 8  | 16 |
| 502758 | HAD hydrolase, IA, variant 1 family protein-                               | 15 | 57 | 79  | 28 | 23 | 45 |
| 739283 | HAD hydrolase, IA, variant 1 family protein-                               | 15 | 57 | 79  | 28 | 23 | 45 |
| 628103 | helix-turn-helix domain protein-                                           | 6  | 66 | 92  | 35 | 16 | 31 |
| 62459  | helix-turn-helix domain protein-                                           | 6  | 66 | 92  | 34 | 17 | 33 |
| 804886 | helix-turn-helix family protein-                                           | 27 | 45 | 63  | 44 | 7  | 14 |
| 393531 | helix-turn-helix family protein-                                           | 27 | 45 | 63  | 42 | 9  | 18 |
| 617676 | helix-turn-helix family protein-                                           | 33 | 39 | 54  | 45 | 6  | 12 |
| 234980 | helix-turn-helix family protein-                                           | 10 | 62 | 86  | 23 | 28 | 55 |
| 292400 | heme oxygenase family protein-                                             | 10 | 62 | 86  | 30 | 21 | 41 |
| 120545 | HIO933-like family protein-                                                | 9  | 63 | 88  | 36 | 15 | 29 |
| 700856 | HIO933-like family protein-                                                | 9  | 63 | 88  | 36 | 15 | 29 |
| 320879 | hicB family protein-                                                       | 43 | 29 | 40  | 47 | 4  | 8  |
| 367280 | histidine kinase-, DNA gyrase B-, and HSP90-like ATPase family protein-    | 28 | 44 | 61  | 43 | 8  | 16 |
| 653207 | histidine phosphatase super family protein-                                | 14 | 58 | 81  | 35 | 16 | 31 |
| 745622 | HNH endonuclease family protein-                                           | 32 | 40 | 56  | 44 | 7  | 14 |
| 783760 | HNH endonuclease family protein-                                           | 32 | 40 | 56  | 44 | 7  | 14 |
| 125044 | HNH endonuclease family protein-                                           | 25 | 47 | 65  | 35 | 16 | 31 |
| 130922 | HNH endonuclease family protein-                                           | 25 | 47 | 65  | 35 | 16 | 31 |
| 475623 | HNH endonuclease family protein-                                           | 25 | 47 | 65  | 35 | 16 | 31 |
| 746397 | HTH domain protein-                                                        | 1  | 71 | 99  | 16 | 35 | 69 |
| 87182  | hxlR-like helix-turn-helix family protein-                                 | 0  | 72 | 100 | 10 | 41 | 80 |
| 808251 | hypothetical protein-                                                      | 16 | 56 | 78  | 38 | 13 | 25 |
| 797025 | hypothetical protein-                                                      | 20 | 52 | 72  | 39 | 12 | 24 |
| 569990 | hypothetical protein-                                                      | 28 | 44 | 61  | 44 | 7  | 14 |
| 522652 | hypothetical protein-                                                      | 21 | 51 | 71  | 39 | 12 | 24 |
| 651964 | hypothetical protein-                                                      | 30 | 42 | 58  | 44 | 7  | 14 |
| 63339  | hypothetical protein-                                                      | 31 | 41 | 57  | 44 | 7  | 14 |
| 170749 | hypothetical protein-                                                      | 33 | 39 | 54  | 45 | 6  | 12 |
| 793883 | hypothetical protein-                                                      | 33 | 39 | 54  | 45 | 6  | 12 |
| 700522 | hypothetical protein-                                                      | 24 | 48 | 67  | 39 | 12 | 24 |
| 790901 | hypothetical protein-                                                      | 0  | 72 | 100 | 8  | 43 | 84 |
| 129392 | hypothetical protein-                                                      | 11 | 61 | 85  | 22 | 29 | 57 |
| 636288 | imcF-related N-terminal domain protein-                                    | 4  | 68 | 94  | 19 | 32 | 63 |
| 220924 | impA-related N-terminal family protein-                                    | 1  | 71 | 99  | 20 | 31 | 61 |
| 805134 | inner membrane protein YjCH-                                               | 14 | 58 | 81  | 35 | 16 | 31 |
| 721524 | insA N-terminal domain protein-                                            | 25 | 47 | 65  | 48 | 3  | 6  |
| 576036 | intracellular septation A family protein-                                  | 20 | 52 | 72  | 37 | 14 | 27 |
| 224227 | isochorismatase family protein-                                            | 5  | 67 | 93  | 25 | 26 | 51 |



|        |                                                                                                           |    |    |     |    |    |    |
|--------|-----------------------------------------------------------------------------------------------------------|----|----|-----|----|----|----|
| 397981 | putative cation efflux system protein-                                                                    | 0  | 72 | 100 | 9  | 42 | 82 |
| 714863 | putative cell division protein-                                                                           | 28 | 44 | 61  | 40 | 11 | 22 |
| 217484 | putative chromate transporter-                                                                            | 21 | 51 | 71  | 39 | 12 | 24 |
| 684285 | putative conjugal transfer domain protein-                                                                | 29 | 43 | 60  | 44 | 7  | 14 |
| 580816 | putative DcaP-like domain protein-                                                                        | 17 | 55 | 76  | 37 | 14 | 27 |
| 607395 | putative filC-                                                                                            | 2  | 70 | 97  | 16 | 35 | 69 |
| 607397 | putative filE-                                                                                            | 11 | 61 | 85  | 29 | 22 | 43 |
| 452088 | putative filE-                                                                                            | 8  | 54 | 89  | 25 | 26 | 51 |
| 397149 | putative glutamate 5-kinase-                                                                              | 1  | 71 | 99  | 16 | 35 | 69 |
| 724549 | putative glutamate 5-kinase-                                                                              | 1  | 71 | 99  | 16 | 35 | 69 |
| 452913 | putative glutamate 5-kinase-                                                                              | 0  | 72 | 100 | 12 | 39 | 76 |
| 655293 | putative glutamate 5-kinase-                                                                              | 0  | 72 | 100 | 12 | 39 | 76 |
| 803176 | putative glutamate 5-kinase-                                                                              | 0  | 72 | 100 | 11 | 40 | 78 |
| 720081 | putative glutamate 5-kinase-                                                                              | 0  | 72 | 100 | 10 | 41 | 80 |
| 256348 | putative glutamate 5-kinase-                                                                              | 0  | 72 | 100 | 9  | 42 | 82 |
| 263166 | putative glutamate 5-kinase-                                                                              | 0  | 72 | 100 | 9  | 42 | 82 |
| 724687 | putative glutamate 5-kinase-                                                                              | 0  | 72 | 100 | 9  | 42 | 82 |
| 791477 | putative glutamate 5-kinase-                                                                              | 0  | 72 | 100 | 9  | 42 | 82 |
| 199875 | putative glutamate 5-kinase-                                                                              | 10 | 62 | 86  | 22 | 29 | 57 |
| 392576 | putative glutamate 5-kinase-                                                                              | 0  | 72 | 100 | 8  | 43 | 84 |
| 469012 | putative glutamate 5-kinase-                                                                              | 0  | 72 | 100 | 8  | 43 | 84 |
| 536544 | putative glutamate 5-kinase-                                                                              | 0  | 72 | 100 | 8  | 43 | 84 |
| 104336 | putative gp1.2-                                                                                           | 32 | 40 | 56  | 44 | 7  | 14 |
| 806952 | putative gp1.2-                                                                                           | 32 | 40 | 56  | 44 | 7  | 14 |
| 435934 | putative gp77-                                                                                            | 8  | 64 | 89  | 28 | 23 | 45 |
| 72415  | putative iron uptake ABC transporter permease domain protein-                                             | 17 | 55 | 76  | 35 | 16 | 31 |
| 285371 | putative lipoprotein-                                                                                     | 28 | 44 | 61  | 44 | 7  | 14 |
| 384583 | putative lipoprotein-                                                                                     | 30 | 42 | 58  | 44 | 7  | 14 |
| 705200 | putative lipoprotein-                                                                                     | 39 | 33 | 46  | 45 | 6  | 12 |
| 159272 | putative lipoprotein-                                                                                     | 20 | 52 | 72  | 33 | 18 | 35 |
| 41686  | putative lipoprotein-                                                                                     | 20 | 52 | 72  | 31 | 20 | 39 |
| 226685 | putative major capsid protein-                                                                            | 4  | 68 | 94  | 22 | 29 | 57 |
| 171055 | putative major capsid protein-                                                                            | 5  | 67 | 93  | 20 | 31 | 61 |
| 388381 | putative major capsid protein-                                                                            | 5  | 67 | 93  | 20 | 31 | 61 |
| 336369 | putative membrane protein-                                                                                | 1  | 71 | 99  | 31 | 20 | 39 |
| 136137 | putative membrane protein-                                                                                | 4  | 68 | 94  | 34 | 17 | 33 |
| 363161 | putative membrane protein-                                                                                | 9  | 63 | 88  | 37 | 14 | 27 |
| 409437 | putative membrane protein-                                                                                | 9  | 63 | 88  | 37 | 14 | 27 |
| 613122 | putative membrane protein-                                                                                | 9  | 63 | 88  | 37 | 14 | 27 |
| 260711 | putative membrane protein-                                                                                | 5  | 67 | 93  | 29 | 22 | 43 |
| 155892 | putative membrane protein-                                                                                | 15 | 57 | 79  | 38 | 13 | 25 |
| 680271 | putative membrane protein-                                                                                | 27 | 45 | 63  | 45 | 6  | 12 |
| 195547 | putative membrane protein-                                                                                | 9  | 63 | 88  | 31 | 20 | 39 |
| 807466 | putative membrane protein-                                                                                | 27 | 45 | 63  | 44 | 7  | 14 |
| 515175 | putative membrane protein-                                                                                | 28 | 44 | 61  | 44 | 7  | 14 |
| 677513 | putative membrane protein-                                                                                | 21 | 51 | 71  | 39 | 12 | 24 |
| 435524 | putative membrane protein-                                                                                | 33 | 39 | 54  | 46 | 5  | 10 |
| 289638 | putative membrane protein-                                                                                | 34 | 38 | 53  | 46 | 5  | 10 |
| 785603 | putative membrane protein-                                                                                | 32 | 40 | 56  | 45 | 6  | 12 |
| 807517 | putative membrane protein-                                                                                | 32 | 40 | 56  | 45 | 6  | 12 |
| 362770 | putative membrane protein-                                                                                | 29 | 43 | 60  | 43 | 8  | 16 |
| 458978 | putative membrane protein-                                                                                | 20 | 52 | 72  | 37 | 14 | 27 |
| 276326 | putative membrane protein-                                                                                | 34 | 38 | 53  | 45 | 6  | 12 |
| 287845 | putative membrane protein-                                                                                | 32 | 40 | 56  | 43 | 8  | 16 |
| 351587 | putative membrane protein-                                                                                | 14 | 58 | 81  | 30 | 21 | 41 |
| 533394 | putative membrane protein-                                                                                | 11 | 61 | 85  | 27 | 24 | 47 |
| 705861 | putative membrane protein-                                                                                | 13 | 59 | 82  | 29 | 22 | 43 |
| 333860 | putative membrane protein-                                                                                | 16 | 56 | 78  | 30 | 21 | 41 |
| 747584 | putative membrane protein-                                                                                | 33 | 39 | 54  | 42 | 9  | 18 |
| 806150 | putative membrane protein-                                                                                | 17 | 55 | 76  | 30 | 21 | 41 |
| 623507 | putative membrane protein-                                                                                | 40 | 32 | 44  | 43 | 8  | 16 |
| 641159 | putative membrane protein-                                                                                | 24 | 48 | 67  | 33 | 18 | 35 |
| 128341 | putative metal-dependent hydrolase domain protein-                                                        | 48 | 24 | 33  | 47 | 4  | 8  |
| 98029  | putative outer membrane protein A-                                                                        | 52 | 20 | 28  | 49 | 2  | 4  |
| 364501 | putative outer membrane protein A-                                                                        | 33 | 39 | 54  | 39 | 12 | 24 |
| 166997 | putative Peptidoglycan domain protein-                                                                    | 0  | 72 | 100 | 9  | 42 | 82 |
| 101116 | putative Peptidoglycan domain protein-                                                                    | 0  | 72 | 100 | 8  | 43 | 84 |
| 102457 | putative Peptidoglycan domain protein-                                                                    | 0  | 72 | 100 | 8  | 43 | 84 |
| 103649 | putative Peptidoglycan domain protein-                                                                    | 0  | 72 | 100 | 8  | 43 | 84 |
| 120872 | putative Peptidoglycan domain protein-                                                                    | 0  | 72 | 100 | 8  | 43 | 84 |
| 278244 | putative Peptidoglycan domain protein-                                                                    | 0  | 72 | 100 | 8  | 43 | 84 |
| 279496 | putative Peptidoglycan domain protein-                                                                    | 0  | 72 | 100 | 8  | 43 | 84 |
| 336794 | putative Peptidoglycan domain protein-                                                                    | 0  | 72 | 100 | 8  | 43 | 84 |
| 337039 | putative Peptidoglycan domain protein-                                                                    | 0  | 72 | 100 | 8  | 43 | 84 |
| 346653 | putative Peptidoglycan domain protein-                                                                    | 0  | 72 | 100 | 8  | 43 | 84 |
| 354279 | putative Peptidoglycan domain protein-                                                                    | 0  | 72 | 100 | 8  | 43 | 84 |
| 363173 | putative Peptidoglycan domain protein-                                                                    | 0  | 72 | 100 | 8  | 43 | 84 |
| 440371 | putative Peptidoglycan domain protein-                                                                    | 0  | 72 | 100 | 8  | 43 | 84 |
| 454768 | putative Peptidoglycan domain protein-                                                                    | 0  | 72 | 100 | 8  | 43 | 84 |
| 473580 | putative Peptidoglycan domain protein-                                                                    | 0  | 72 | 100 | 8  | 43 | 84 |
| 509465 | putative Peptidoglycan domain protein-                                                                    | 0  | 72 | 100 | 8  | 43 | 84 |
| 543512 | putative Peptidoglycan domain protein-                                                                    | 0  | 72 | 100 | 8  | 43 | 84 |
| 601310 | putative Peptidoglycan domain protein-                                                                    | 0  | 72 | 100 | 8  | 43 | 84 |
| 602088 | putative Peptidoglycan domain protein-                                                                    | 0  | 72 | 100 | 8  | 43 | 84 |
| 630242 | putative Peptidoglycan domain protein-                                                                    | 0  | 72 | 100 | 8  | 43 | 84 |
| 667397 | putative Peptidoglycan domain protein-                                                                    | 0  | 72 | 100 | 8  | 43 | 84 |
| 700122 | putative Peptidoglycan domain protein-                                                                    | 0  | 72 | 100 | 8  | 43 | 84 |
| 724743 | putative Peptidoglycan domain protein-                                                                    | 0  | 72 | 100 | 8  | 43 | 84 |
| 725147 | putative Peptidoglycan domain protein-                                                                    | 0  | 72 | 100 | 8  | 43 | 84 |
| 731860 | putative Peptidoglycan domain protein-                                                                    | 0  | 72 | 100 | 8  | 43 | 84 |
| 732233 | putative Peptidoglycan domain protein-                                                                    | 0  | 72 | 100 | 8  | 43 | 84 |
| 750341 | putative Peptidoglycan domain protein-                                                                    | 0  | 72 | 100 | 8  | 43 | 84 |
| 760323 | putative Peptidoglycan domain protein-                                                                    | 0  | 72 | 100 | 8  | 43 | 84 |
| 802544 | putative Peptidoglycan domain protein-                                                                    | 0  | 72 | 100 | 8  | 43 | 84 |
| 80536  | putative Peptidoglycan domain protein-                                                                    | 0  | 72 | 100 | 8  | 43 | 84 |
| 806158 | putative Peptidoglycan domain protein-                                                                    | 0  | 72 | 100 | 8  | 43 | 84 |
| 575271 | putative phage-like protein-                                                                              | 27 | 45 | 63  | 38 | 13 | 25 |
| 668726 | putative phosphoribosylglycinamide formyltransferase-                                                     | 19 | 53 | 74  | 37 | 14 | 27 |
| 227376 | putative pilus assembly protein FilF-                                                                     | 22 | 50 | 69  | 36 | 15 | 29 |
| 552193 | putative pilus subunit FilA-                                                                              | 0  | 72 | 100 | 24 | 27 | 53 |
| 607393 | putative pilus subunit FilA-                                                                              | 0  | 72 | 100 | 20 | 31 | 61 |
| 742749 | putative pilus subunit FilA-                                                                              | 0  | 72 | 100 | 12 | 39 | 76 |
| 244760 | putative predicted protein-                                                                               | 43 | 29 | 40  | 48 | 3  | 6  |
| 162420 | putative restriction endonuclease PvuRts11-                                                               | 23 | 49 | 68  | 32 | 19 | 37 |
| 189995 | putative signal peptide-containing protein-                                                               | 22 | 50 | 69  | 34 | 17 | 33 |
| 342195 | putative tail fiber-                                                                                      | 25 | 47 | 65  | 37 | 14 | 27 |
| 269608 | putative tolerance to group A colicins, single-stranded filamentous DNA phage, required for OM integrity- | 21 | 51 | 71  | 39 | 12 | 24 |
| 173547 | putative transmembrane protein-                                                                           | 11 | 61 | 85  | 27 | 24 | 47 |
| 736845 | putative transposase for insertion sequence element IS1086 domain protein-                                | 16 | 56 | 78  | 38 | 13 | 25 |

|        |                                                                               |    |    |     |    |    |    |
|--------|-------------------------------------------------------------------------------|----|----|-----|----|----|----|
| 456575 | putative transposase-                                                         | 46 | 26 | 36  | 47 | 4  | 8  |
| 90095  | putative transposase-                                                         | 41 | 31 | 43  | 44 | 7  | 14 |
| 238887 | pyridine nucleotide-disulfide oxidoreductase family protein-                  | 9  | 63 | 88  | 32 | 19 | 37 |
| 705873 | pyridine nucleotide-disulfide oxidoreductase family protein-                  | 9  | 63 | 88  | 32 | 19 | 37 |
| 375222 | pyridine nucleotide-disulfide oxidoreductase family protein-                  | 20 | 52 | 72  | 34 | 17 | 33 |
| 601654 | redox-sensitive transcriptional activator SoxR-                               | 1  | 71 | 99  | 11 | 40 | 78 |
| 384718 | replicase family protein-                                                     | 28 | 44 | 61  | 44 | 7  | 14 |
| 183061 | resolvase, N terminal domain protein-                                         | 29 | 43 | 60  | 44 | 7  | 14 |
| 682126 | reverse transcriptase family protein-                                         | 31 | 41 | 57  | 39 | 12 | 24 |
| 415840 | rhs element Vgr family protein-                                               | 14 | 58 | 81  | 30 | 21 | 41 |
| 667656 | rhs element Vgr family protein-                                               | 16 | 56 | 78  | 30 | 21 | 41 |
| 696546 | rhs element Vgr family protein-                                               | 16 | 56 | 78  | 30 | 21 | 41 |
| 225297 | rhs element Vgr family protein-                                               | 9  | 63 | 88  | 22 | 29 | 57 |
| 600576 | RHS Repeat family protein-                                                    | 5  | 67 | 93  | 28 | 23 | 45 |
| 689076 | RHS Repeat family protein-                                                    | 17 | 55 | 76  | 28 | 23 | 45 |
| 758969 | RHS repeat-associated core domain protein-                                    | 14 | 58 | 81  | 33 | 18 | 35 |
| 805407 | RHS repeat-associated core domain protein-                                    | 14 | 58 | 81  | 33 | 18 | 35 |
| 604279 | ribD C-terminal domain protein-                                               | 20 | 52 | 72  | 34 | 17 | 33 |
| 569088 | ring hydroxylating alpha subunit family protein-                              | 20 | 52 | 72  | 34 | 17 | 33 |
| 529248 | rmlD substrate binding domain protein-                                        | 36 | 36 | 50  | 46 | 5  | 10 |
| 651024 | rmlD substrate binding domain protein-                                        | 36 | 36 | 50  | 46 | 5  | 10 |
| 506784 | RNA polymerase sigma factor, sigma-70 family protein-                         | 10 | 62 | 86  | 30 | 21 | 41 |
| 219455 | saccharopine dehydrogenase family protein-                                    | 9  | 63 | 88  | 36 | 15 | 29 |
| 326829 | SAF domain protein-                                                           | 44 | 28 | 39  | 47 | 4  | 8  |
| 807215 | SEC-C motif domain protein-                                                   | 25 | 47 | 65  | 39 | 12 | 24 |
| 592033 | secretin and TonB N terminus short domain protein-                            | 10 | 62 | 86  | 30 | 21 | 41 |
| 117124 | secretory lipase family protein-                                              | 10 | 62 | 86  | 21 | 30 | 59 |
| 149967 | secretory lipase family protein-                                              | 10 | 62 | 86  | 21 | 30 | 59 |
| 273671 | sel1 repeat family protein-                                                   | 6  | 66 | 92  | 35 | 16 | 31 |
| 736340 | sel1 repeat family protein-                                                   | 6  | 66 | 92  | 35 | 16 | 31 |
| 611338 | sensory box protein-                                                          | 0  | 72 | 100 | 8  | 43 | 84 |
| 453982 | SH3 domain protein-                                                           | 15 | 57 | 79  | 31 | 20 | 39 |
| 222387 | single-strand binding family protein-                                         | 44 | 28 | 39  | 47 | 4  | 8  |
| 692344 | small Multidrug Resistance family protein-                                    | 36 | 36 | 50  | 44 | 7  | 14 |
| 648674 | sodium symporter family protein-                                              | 17 | 55 | 76  | 35 | 16 | 31 |
| 336688 | sodium/hydrogen exchanger family protein-                                     | 6  | 66 | 92  | 21 | 30 | 59 |
| 294143 | stress-responsive nuclear envelope family protein-                            | 4  | 68 | 94  | 21 | 30 | 59 |
| 325392 | stress-responsive nuclear envelope family protein-                            | 4  | 68 | 94  | 20 | 31 | 61 |
| 415932 | stress-responsive nuclear envelope family protein-                            | 4  | 68 | 94  | 20 | 31 | 61 |
| 475605 | stress-responsive nuclear envelope family protein-                            | 4  | 68 | 94  | 20 | 31 | 61 |
| 696584 | stress-responsive nuclear envelope family protein-                            | 4  | 68 | 94  | 20 | 31 | 61 |
| 791479 | stress-responsive nuclear envelope family protein-                            | 4  | 68 | 94  | 20 | 31 | 61 |
| 51908  | sugar (and other) transporter family protein-                                 | 20 | 52 | 72  | 35 | 16 | 31 |
| 636532 | sugar (and other) transporter family protein-                                 | 0  | 72 | 100 | 10 | 41 | 80 |
| 104331 | terminase small subunit-                                                      | 32 | 40 | 56  | 40 | 11 | 22 |
| 371029 | terminase small subunit-                                                      | 32 | 40 | 56  | 40 | 11 | 22 |
| 747571 | terminase small subunit-                                                      | 32 | 40 | 56  | 40 | 11 | 22 |
| 98837  | terminase small subunit-                                                      | 32 | 40 | 56  | 40 | 11 | 22 |
| 360238 | terminase-like family protein-                                                | 7  | 65 | 90  | 20 | 31 | 61 |
| 144114 | tetratricopeptide repeat family protein-                                      | 9  | 63 | 88  | 24 | 27 | 53 |
| 606234 | tetratricopeptide repeat family protein-                                      | 9  | 63 | 88  | 24 | 27 | 53 |
| 756759 | tetratricopeptide repeat family protein-                                      | 12 | 60 | 83  | 26 | 25 | 49 |
| 807742 | thioesterase-like superfamily protein-                                        | 19 | 53 | 74  | 37 | 14 | 27 |
| 75638  | thioredoxin-like domain protein-                                              | 29 | 43 | 60  | 44 | 7  | 14 |
| 692442 | tnsA endonuclease N terminal family protein-                                  | 14 | 58 | 81  | 37 | 14 | 27 |
| 806568 | tonB dependent receptor family protein-                                       | 16 | 56 | 78  | 35 | 16 | 31 |
| 222278 | tonB dependent receptor family protein-                                       | 8  | 64 | 89  | 19 | 32 | 63 |
| 451113 | tonB family C-terminal domain protein-                                        | 10 | 62 | 86  | 30 | 21 | 41 |
| 427917 | tonB-dependent siderophore receptor family protein-                           | 20 | 52 | 72  | 36 | 15 | 29 |
| 793832 | traE family protein-                                                          | 28 | 44 | 61  | 44 | 7  | 14 |
| 119397 | traG-like, N-terminal region family protein-                                  | 28 | 44 | 61  | 44 | 7  | 14 |
| 807469 | traK family protein-                                                          | 27 | 45 | 63  | 44 | 7  | 14 |
| 596812 | traM recognition site of TraD and TraG family protein-                        | 29 | 43 | 60  | 45 | 6  | 12 |
| 122216 | transcriptional regulator, TetR family domain protein-                        | 8  | 64 | 89  | 28 | 23 | 45 |
| 259699 | transglycosylase SLT domain protein-                                          | 27 | 45 | 63  | 44 | 7  | 14 |
| 569985 | transglycosylase SLT domain protein-                                          | 29 | 43 | 60  | 44 | 7  | 14 |
| 20948  | transglycosylase SLT domain protein-                                          | 32 | 40 | 56  | 44 | 7  | 14 |
| 806971 | transglycosylase SLT domain protein-                                          | 32 | 40 | 56  | 44 | 7  | 14 |
| 503558 | transporter, betaine/carnitine/choline transporter family protein-            | 21 | 51 | 71  | 40 | 11 | 22 |
| 513902 | transporter, betaine/carnitine/choline transporter family protein-            | 21 | 51 | 71  | 39 | 12 | 24 |
| 581747 | transposase domain protein-                                                   | 4  | 68 | 94  | 20 | 31 | 61 |
| 231964 | transposase family protein-                                                   | 31 | 41 | 57  | 46 | 5  | 10 |
| 196449 | transposase family protein-                                                   | 29 | 43 | 60  | 41 | 10 | 20 |
| 386945 | transposase family protein-                                                   | 29 | 43 | 60  | 39 | 12 | 24 |
| 634479 | transposase IS66 family protein-                                              | 41 | 31 | 43  | 44 | 7  | 14 |
| 807478 | traU family protein-                                                          | 28 | 44 | 61  | 44 | 7  | 14 |
| 278501 | type I secretion C-terminal target domain protein-                            | 1  | 71 | 99  | 28 | 23 | 45 |
| 19466  | type I secretion C-terminal target domain protein-                            | 22 | 50 | 69  | 41 | 10 | 20 |
| 101037 | type I secretion C-terminal target domain protein-                            | 12 | 60 | 83  | 29 | 22 | 43 |
| 40390  | type I secretion C-terminal target domain protein-                            | 17 | 55 | 76  | 32 | 19 | 37 |
| 193555 | type I secretion C-terminal target domain protein-                            | 23 | 49 | 68  | 35 | 16 | 31 |
| 499299 | type I secretion C-terminal target domain protein-                            | 36 | 36 | 50  | 43 | 8  | 16 |
| 52047  | type I secretion C-terminal target domain protein-                            | 35 | 37 | 51  | 42 | 9  | 18 |
| 766196 | type I secretion C-terminal target domain protein-                            | 42 | 30 | 42  | 45 | 6  | 12 |
| 99100  | type I secretion C-terminal target domain protein-                            | 15 | 57 | 79  | 27 | 24 | 47 |
| 763104 | type IV conjugative transfer system protein TraL-                             | 27 | 45 | 63  | 43 | 8  | 16 |
| 97858  | type IV conjugative transfer system protein TraV-                             | 28 | 44 | 61  | 44 | 7  | 14 |
| 484559 | type VI secretion ATPase, CtpV1 family-                                       | 1  | 71 | 99  | 19 | 32 | 63 |
| 56013  | type VI secretion system effector, Hcp1 family protein-                       | 5  | 67 | 93  | 23 | 28 | 55 |
| 530399 | type-IV conjugative transfer system mating pair stabilisation family protein- | 30 | 42 | 58  | 44 | 7  | 14 |
| 513127 | type-F conjugative transfer system pilin assembly protein TrbC-               | 27 | 45 | 63  | 44 | 7  | 14 |
| 119310 | type-F conjugative transfer system protein TraW-                              | 28 | 44 | 61  | 44 | 7  | 14 |
| 807474 | type-IV secretion system protein TraC-                                        | 28 | 44 | 61  | 44 | 7  | 14 |
| 428274 | tyrosine-protein kinase ptk-                                                  | 1  | 71 | 99  | 14 | 37 | 73 |
| 150960 | tyrosine-protein kinase ptk-                                                  | 3  | 69 | 96  | 14 | 37 | 73 |
| 440288 | tyrosine-protein kinase ptk-                                                  | 3  | 69 | 96  | 14 | 37 | 73 |
| 510359 | tyrosine-protein kinase ptk-                                                  | 3  | 69 | 96  | 14 | 37 | 73 |
| 518066 | tyrosine-protein kinase ptk-                                                  | 3  | 69 | 96  | 14 | 37 | 73 |
| 546407 | tyrosine-protein kinase ptk-                                                  | 3  | 69 | 96  | 14 | 37 | 73 |
| 719200 | tyrosine-protein kinase ptk-                                                  | 3  | 69 | 96  | 14 | 37 | 73 |
| 1900   | UDP-N-acetyl-D-glucosamine 2-epimerase, UDP-hydrolysing-                      | 43 | 29 | 40  | 47 | 4  | 8  |
| 197239 | UDP-N-acetyl-D-glucosamine 2-epimerase, UDP-hydrolysing-                      | 43 | 29 | 40  | 47 | 4  | 8  |
| 55120  | UDP-N-acetylglucosamine 2-epimerase-                                          | 36 | 36 | 50  | 46 | 5  | 10 |
| 74435  | UDP-N-acetylglucosamine 4,6-dehydratase-                                      | 43 | 29 | 40  | 47 | 4  | 8  |
| 184486 | UDP-N-acetylglucosamine 4,6-dehydratase-                                      | 44 | 28 | 39  | 47 | 4  | 8  |
| 716588 | uref family protein-                                                          | 6  | 66 | 92  | 17 | 34 | 67 |
| 407997 | winged helix DNA-binding domain protein-                                      | 14 | 58 | 81  | 36 | 15 | 29 |
| 393139 | zeta toxin family protein-                                                    | 33 | 39 | 54  | 44 | 7  | 14 |
| 521990 | zinc-binding dehydrogenase family protein-                                    | 20 | 52 | 72  | 34 | 17 | 33 |



|       |                                                              |    |    |     |    |    |    |
|-------|--------------------------------------------------------------|----|----|-----|----|----|----|
| 50389 | type IV/VI secretion system , DotU family domain protein-    | 1  | 71 | 99  | 19 | 32 | 63 |
| 9205  | signal peptidase I-                                          | 28 | 44 | 61  | 44 | 7  | 14 |
| 9211  | bacterial conjugation TrbI-like family protein-              | 28 | 44 | 61  | 44 | 7  | 14 |
| 37288 | conserved hypothetical protein-                              | 10 | 62 | 86  | 30 | 21 | 41 |
| 18641 | major Facilitator Superfamily protein-                       | 2  | 70 | 97  | 18 | 33 | 65 |
| 27820 | succinate-semialdehyde dehydrogenase family protein-         | 2  | 70 | 97  | 18 | 33 | 65 |
| 6553  | conserved hypothetical protein-                              | 25 | 47 | 65  | 40 | 11 | 22 |
| 21319 | conserved hypothetical protein-                              | 1  | 71 | 99  | 16 | 35 | 69 |
| 27824 | luciferase-like monooxygenase family protein-                | 1  | 71 | 99  | 16 | 35 | 69 |
| 3746  | conserved hypothetical protein-                              | 1  | 71 | 99  | 16 | 35 | 69 |
| 3749  | conserved hypothetical protein-                              | 1  | 71 | 99  | 16 | 35 | 69 |
| 18899 | prevent-host-death family protein-                           | 20 | 52 | 72  | 35 | 16 | 31 |
| 20543 | conserved hypothetical protein-                              | 29 | 43 | 60  | 41 | 10 | 20 |
| 20715 | conserved hypothetical protein-                              | 29 | 43 | 60  | 41 | 10 | 20 |
| 1896  | polysaccharide biosynthesis/export family protein-           | 1  | 71 | 99  | 14 | 37 | 73 |
| 19428 | polysaccharide biosynthesis/export family protein-           | 1  | 71 | 99  | 14 | 37 | 73 |
| 22993 | polysaccharide biosynthesis/export family protein-           | 1  | 71 | 99  | 14 | 37 | 73 |
| 22324 | ribD C-terminal domain protein-                              | 20 | 52 | 72  | 34 | 17 | 33 |
| 145   | conserved hypothetical protein-                              | 3  | 69 | 96  | 16 | 35 | 69 |
| 40734 | conserved hypothetical protein-                              | 9  | 63 | 88  | 23 | 28 | 55 |
| 835   | conserved hypothetical protein-                              | 10 | 62 | 86  | 23 | 28 | 55 |
| 11474 | conserved hypothetical protein-                              | 27 | 45 | 63  | 37 | 14 | 27 |
| 4275  | bacterial regulatory helix-turn-helix , lysR family protein- | 0  | 72 | 100 | 9  | 42 | 82 |
| 55726 | conserved hypothetical protein-                              | 0  | 72 | 100 | 9  | 42 | 82 |
| 22995 | tyrosine-protein kinase ptk-                                 | 3  | 69 | 96  | 14 | 37 | 73 |
| 42202 | tyrosine-protein kinase ptk-                                 | 3  | 69 | 96  | 14 | 37 | 73 |
| 21304 | putative Peptidoglycan domain protein-                       | 0  | 72 | 100 | 8  | 43 | 84 |
| 21326 | putative glutamate 5-kinase-                                 | 0  | 72 | 100 | 8  | 43 | 84 |
| 3762  | putative Peptidoglycan domain protein-                       | 0  | 72 | 100 | 8  | 43 | 84 |
| 44374 | putative Peptidoglycan domain protein-                       | 0  | 72 | 100 | 8  | 43 | 84 |
| 53585 | aldehyde dehydrogenase family protein-                       | 0  | 72 | 100 | 8  | 43 | 84 |
| 58600 | putative Peptidoglycan domain protein-                       | 0  | 72 | 100 | 8  | 43 | 84 |
| 11449 | AMP-binding enzyme family protein-                           | 3  | 69 | 96  | 13 | 38 | 75 |
| 3124  | conserved hypothetical protein-                              | 21 | 51 | 71  | 31 | 20 | 39 |

Suppl Table 10. Centroids found in higher frequency in Perirectal-carbapenem sensitive isolates

| Centroid ID | Annotation                                                | Peri_Resis_A | Peri_Resis_P | % freq | Peri_sens_A | Peri_sens_P | % freq |
|-------------|-----------------------------------------------------------|--------------|--------------|--------|-------------|-------------|--------|
| 339381      | tonB dependent receptor family protein-                   | 51           | 21           | 29     | 7           | 44          | 86     |
| 399160      | tonB dependent receptor family protein-                   | 51           | 21           | 29     | 7           | 44          | 86     |
| 476321      | tonB dependent receptor family protein-                   | 51           | 21           | 29     | 7           | 44          | 86     |
| 607112      | tonB dependent receptor family protein-                   | 51           | 21           | 29     | 7           | 44          | 86     |
| 198440      | polysaccharide deacetylase family protein-                | 71           | 1            | 1      | 27          | 24          | 47     |
| 452284      | polysaccharide deacetylase family protein-                | 71           | 1            | 1      | 27          | 24          | 47     |
| 240857      | bacterial regulatory, tetR family protein-                | 71           | 1            | 1      | 28          | 23          | 45     |
| 254588      | NADH:flavin oxidoreductase / NADH oxidase family protein- | 71           | 1            | 1      | 28          | 23          | 45     |
| 346343      | POTRA domain, ShlB-type family protein-                   | 71           | 1            | 1      | 28          | 23          | 45     |
| 400060      | POTRA domain, ShlB-type family protein-                   | 71           | 1            | 1      | 28          | 23          | 45     |
| 46184       | DJ-1/PfpI family protein-                                 | 71           | 1            | 1      | 28          | 23          | 45     |
| 582337      | putative antibiotic biosynthesis monooxygenase-           | 71           | 1            | 1      | 28          | 23          | 45     |
| 79557       | iron-containing alcohol dehydrogenase family protein-     | 71           | 1            | 1      | 28          | 23          | 45     |
| 86252       | POTRA domain, ShlB-type family protein-                   | 71           | 1            | 1      | 28          | 23          | 45     |
| 14627       | helix-turn-helix domain protein-                          | 63           | 9            | 13     | 18          | 33          | 65     |
| 184987      | putative membrane protein-                                | 71           | 1            | 1      | 29          | 22          | 43     |
| 714592      | peptidase S24-like family protein-                        | 72           | 0            | 0      | 32          | 19          | 37     |
| 235734      | conserved hypothetical protein-                           | 70           | 2            | 3      | 28          | 23          | 45     |
| 481603      | conserved hypothetical protein-                           | 70           | 2            | 3      | 28          | 23          | 45     |
| 727946      | conserved hypothetical protein-                           | 70           | 2            | 3      | 28          | 23          | 45     |
| 186178      | putative carbapenem-associated resistance protein-        | 71           | 1            | 1      | 30          | 21          | 41     |
| 471062      | S-formylglutathione hydrolase-                            | 71           | 1            | 1      | 30          | 21          | 41     |
| 718372      | putative carbapenem-associated resistance protein-        | 71           | 1            | 1      | 30          | 21          | 41     |
| 480934      | metal-sensitive transcriptional repressor family protein- | 69           | 3            | 4      | 27          | 24          | 47     |
| 198595      | IMS HHH motif family protein-                             | 69           | 3            | 4      | 28          | 23          | 45     |
| 308577      | IMS HHH motif family protein-                             | 69           | 3            | 4      | 28          | 23          | 45     |
| 509462      | IMS HHH motif family protein-                             | 69           | 3            | 4      | 28          | 23          | 45     |
| 605971      | IMS HHH motif family protein-                             | 69           | 3            | 4      | 28          | 23          | 45     |
| 802542      | IMS HHH motif family protein-                             | 69           | 3            | 4      | 28          | 23          | 45     |
| 80529       | IMS HHH motif family protein-                             | 69           | 3            | 4      | 28          | 23          | 45     |
| 351821      | glutamine amidotransferase class-I family protein-        | 43           | 29           | 40     | 6           | 45          | 88     |
| 625155      | putative membrane protein-                                | 55           | 17           | 24     | 14          | 37          | 73     |
| 699851      | putative membrane protein-                                | 55           | 17           | 24     | 14          | 37          | 73     |
| 441600      | phage integrase family protein-                           | 71           | 1            | 1      | 32          | 19          | 37     |
| 455525      | phage integrase family protein-                           | 71           | 1            | 1      | 32          | 19          | 37     |
| 631748      | phage integrase family protein-                           | 71           | 1            | 1      | 32          | 19          | 37     |
| 86526       | phage integrase family protein-                           | 71           | 1            | 1      | 32          | 19          | 37     |
| 788509      | conserved hypothetical protein-                           | 61           | 11           | 15     | 19          | 32          | 63     |
| 496027      | conserved hypothetical protein-                           | 44           | 28           | 39     | 7           | 44          | 86     |
| 106578      | IMS HHH motif family protein-                             | 69           | 3            | 4      | 29          | 22          | 43     |
| 256370      | conserved hypothetical protein-                           | 69           | 3            | 4      | 29          | 22          | 43     |
| 263193      | IMS HHH motif family protein-                             | 69           | 3            | 4      | 29          | 22          | 43     |
| 357624      | IMS HHH motif family protein-                             | 69           | 3            | 4      | 29          | 22          | 43     |
| 375606      | conserved hypothetical protein-                           | 69           | 3            | 4      | 29          | 22          | 43     |
| 3766        | IMS HHH motif family protein-                             | 69           | 3            | 4      | 29          | 22          | 43     |
| 396254      | IMS HHH motif family protein-                             | 69           | 3            | 4      | 29          | 22          | 43     |
| 396738      | IMS HHH motif family protein-                             | 69           | 3            | 4      | 29          | 22          | 43     |
| 490711      | IMS HHH motif family protein-                             | 69           | 3            | 4      | 29          | 22          | 43     |
| 528031      | IMS HHH motif family protein-                             | 69           | 3            | 4      | 29          | 22          | 43     |
| 631900      | conserved hypothetical protein-                           | 69           | 3            | 4      | 29          | 22          | 43     |
| 720054      | IMS HHH motif family protein-                             | 69           | 3            | 4      | 29          | 22          | 43     |
| 725152      | IMS HHH motif family protein-                             | 69           | 3            | 4      | 29          | 22          | 43     |
| 730451      | IMS HHH motif family protein-                             | 69           | 3            | 4      | 29          | 22          | 43     |
| 139033      | conserved hypothetical protein-                           | 72           | 0            | 0      | 35          | 16          | 31     |
| 182920      | KR domain protein-                                        | 72           | 0            | 0      | 35          | 16          | 31     |
| 182921      | KR domain protein-                                        | 72           | 0            | 0      | 35          | 16          | 31     |
| 182922      | KR domain protein-                                        | 72           | 0            | 0      | 35          | 16          | 31     |
| 182926      | conserved hypothetical protein-                           | 72           | 0            | 0      | 35          | 16          | 31     |
| 565089      | lysR substrate binding domain protein-                    | 72           | 0            | 0      | 35          | 16          | 31     |
| 565094      | acyl-CoA dehydrogenase, N-terminal domain protein-        | 72           | 0            | 0      | 35          | 16          | 31     |
| 565095      | outer membrane transport family protein-                  | 72           | 0            | 0      | 35          | 16          | 31     |
| 565097      | sodium Bile acid symporter family protein-                | 72           | 0            | 0      | 35          | 16          | 31     |
| 107513      | amino acid permease family protein-                       | 53           | 19           | 26     | 13          | 38          | 75     |
| 346219      | conserved hypothetical protein-                           | 53           | 19           | 26     | 13          | 38          | 75     |
| 688189      | FAD binding domain protein-                               | 53           | 19           | 26     | 13          | 38          | 75     |
| 768842      | cache domain protein-                                     | 53           | 19           | 26     | 13          | 38          | 75     |
| 801730      | hypothetical protein-                                     | 53           | 19           | 26     | 13          | 38          | 75     |
| 141460      | putative membrane protein-                                | 71           | 1            | 1      | 33          | 18          | 35     |
| 185867      | parB-like nuclease domain protein-                        | 71           | 1            | 1      | 33          | 18          | 35     |
| 185869      | conserved hypothetical protein-                           | 71           | 1            | 1      | 33          | 18          | 35     |
| 235647      | conserved hypothetical protein-                           | 71           | 1            | 1      | 33          | 18          | 35     |
| 240888      | parB-like nuclease domain protein-                        | 71           | 1            | 1      | 33          | 18          | 35     |
| 240891      | conserved hypothetical protein-                           | 71           | 1            | 1      | 33          | 18          | 35     |
| 263995      | DEAD/DEAH box helicase family protein-                    | 71           | 1            | 1      | 33          | 18          | 35     |
| 359713      | cobQ/CobB/MinD/ParA nucleotide binding domain protein-    | 71           | 1            | 1      | 33          | 18          | 35     |
| 359718      | conserved hypothetical protein-                           | 71           | 1            | 1      | 33          | 18          | 35     |
| 396857      | conserved hypothetical protein-                           | 71           | 1            | 1      | 33          | 18          | 35     |
| 44015       | initiator Replication family protein-                     | 71           | 1            | 1      | 33          | 18          | 35     |
| 455213      | phage lysozyme family protein-                            | 71           | 1            | 1      | 33          | 18          | 35     |
| 489352      | kaiC family protein-                                      | 71           | 1            | 1      | 33          | 18          | 35     |
| 542161      | conserved hypothetical protein-                           | 71           | 1            | 1      | 33          | 18          | 35     |
| 542168      | conserved hypothetical protein-                           | 71           | 1            | 1      | 33          | 18          | 35     |
| 542231      | ATP dependent DNA ligase domain protein-                  | 71           | 1            | 1      | 33          | 18          | 35     |
| 565461      | ABC transporter family protein-                           | 71           | 1            | 1      | 33          | 18          | 35     |
| 565494      | conserved hypothetical protein-                           | 71           | 1            | 1      | 33          | 18          | 35     |
| 646599      | AAA domain protein-                                       | 71           | 1            | 1      | 33          | 18          | 35     |
| 696417      | DNA primase catalytic core, N-terminal domain protein-    | 71           | 1            | 1      | 33          | 18          | 35     |

|        |                                                             |    |    |    |    |    |    |
|--------|-------------------------------------------------------------|----|----|----|----|----|----|
| 696447 | conserved hypothetical protein-                             | 71 | 1  | 1  | 33 | 18 | 35 |
| 696458 | lysM domain protein-                                        | 71 | 1  | 1  | 33 | 18 | 35 |
| 712717 | conserved hypothetical protein-                             | 71 | 1  | 1  | 33 | 18 | 35 |
| 729012 | conserved hypothetical protein-                             | 71 | 1  | 1  | 33 | 18 | 35 |
| 779835 | conserved hypothetical protein-                             | 71 | 1  | 1  | 33 | 18 | 35 |
| 779840 | conserved hypothetical protein-                             | 71 | 1  | 1  | 33 | 18 | 35 |
| 779844 | conserved hypothetical protein-                             | 71 | 1  | 1  | 33 | 18 | 35 |
| 780783 | putative dNA-binding protein-                               | 71 | 1  | 1  | 33 | 18 | 35 |
| 79483  | conserved hypothetical protein-                             | 71 | 1  | 1  | 33 | 18 | 35 |
| 79528  | thioredoxin family protein-                                 | 71 | 1  | 1  | 33 | 18 | 35 |
| 83749  | helix-turn-helix domain protein-                            | 71 | 1  | 1  | 33 | 18 | 35 |
| 83997  | glycosyltransferase Family 4 family protein-                | 71 | 1  | 1  | 33 | 18 | 35 |
| 99255  | phage lysozyme family protein-                              | 71 | 1  | 1  | 33 | 18 | 35 |
| 627942 | methyltransferase domain protein-                           | 43 | 29 | 40 | 7  | 44 | 86 |
| 318534 | heavy-metal-associated domain protein-                      | 69 | 3  | 4  | 30 | 21 | 41 |
| 337738 | hypothetical protein-                                       | 44 | 28 | 39 | 8  | 43 | 84 |
| 528223 | conserved hypothetical protein-                             | 72 | 0  | 0  | 36 | 15 | 29 |
| 147261 | snoaL-like domain protein-                                  | 53 | 19 | 26 | 14 | 37 | 73 |
| 154115 | acyl-CoA reductase family protein-                          | 53 | 19 | 26 | 14 | 37 | 73 |
| 688195 | HTH domain protein-                                         | 53 | 19 | 26 | 14 | 37 | 73 |
| 100403 | phage minor tail family protein-                            | 71 | 1  | 1  | 34 | 17 | 33 |
| 141546 | conserved hypothetical protein-                             | 71 | 1  | 1  | 34 | 17 | 33 |
| 185846 | conserved hypothetical protein-                             | 71 | 1  | 1  | 34 | 17 | 33 |
| 235678 | conserved hypothetical protein-                             | 71 | 1  | 1  | 34 | 17 | 33 |
| 240816 | AAA domain family protein-                                  | 71 | 1  | 1  | 34 | 17 | 33 |
| 263941 | cobalamin biosynthesis CobT VWA domain protein-             | 71 | 1  | 1  | 34 | 17 | 33 |
| 345219 | conserved hypothetical protein-                             | 71 | 1  | 1  | 34 | 17 | 33 |
| 345227 | conserved hypothetical protein-                             | 71 | 1  | 1  | 34 | 17 | 33 |
| 345259 | conserved hypothetical protein-                             | 71 | 1  | 1  | 34 | 17 | 33 |
| 359705 | conserved hypothetical protein-                             | 71 | 1  | 1  | 34 | 17 | 33 |
| 359744 | conserved hypothetical protein-                             | 71 | 1  | 1  | 34 | 17 | 33 |
| 359750 | phage terminase large subunit-                              | 71 | 1  | 1  | 34 | 17 | 33 |
| 359767 | conserved hypothetical protein-                             | 71 | 1  | 1  | 34 | 17 | 33 |
| 392634 | conserved hypothetical protein-                             | 71 | 1  | 1  | 34 | 17 | 33 |
| 392642 | conserved hypothetical protein-                             | 71 | 1  | 1  | 34 | 17 | 33 |
| 400222 | conserved hypothetical protein-                             | 71 | 1  | 1  | 34 | 17 | 33 |
| 43999  | conserved hypothetical protein-                             | 71 | 1  | 1  | 34 | 17 | 33 |
| 454998 | conserved hypothetical protein-                             | 71 | 1  | 1  | 34 | 17 | 33 |
| 455191 | conserved hypothetical protein-                             | 71 | 1  | 1  | 34 | 17 | 33 |
| 455211 | conserved hypothetical protein-                             | 71 | 1  | 1  | 34 | 17 | 33 |
| 455229 | conserved hypothetical protein-                             | 71 | 1  | 1  | 34 | 17 | 33 |
| 542243 | conserved hypothetical protein-                             | 71 | 1  | 1  | 34 | 17 | 33 |
| 565434 | conserved hypothetical protein-                             | 71 | 1  | 1  | 34 | 17 | 33 |
| 565476 | conserved hypothetical protein-                             | 71 | 1  | 1  | 34 | 17 | 33 |
| 565569 | conserved hypothetical protein-                             | 71 | 1  | 1  | 34 | 17 | 33 |
| 645315 | bacterial regulatory, tetR family protein-                  | 71 | 1  | 1  | 34 | 17 | 33 |
| 646534 | conserved hypothetical protein-                             | 71 | 1  | 1  | 34 | 17 | 33 |
| 646551 | conserved hypothetical protein-                             | 71 | 1  | 1  | 34 | 17 | 33 |
| 696478 | conserved hypothetical protein-                             | 71 | 1  | 1  | 34 | 17 | 33 |
| 696481 | exonuclease, DNA polymerase III, epsilon subunit family dom | 71 | 1  | 1  | 34 | 17 | 33 |
| 712704 | conserved hypothetical protein-                             | 71 | 1  | 1  | 34 | 17 | 33 |
| 728994 | phage minor tail protein L-                                 | 71 | 1  | 1  | 34 | 17 | 33 |
| 780566 | conserved hypothetical protein-                             | 71 | 1  | 1  | 34 | 17 | 33 |
| 780766 | putative phage tail protein-                                | 71 | 1  | 1  | 34 | 17 | 33 |
| 800832 | HPP family protein-                                         | 71 | 1  | 1  | 34 | 17 | 33 |
| 83037  | conserved hypothetical protein-                             | 71 | 1  | 1  | 34 | 17 | 33 |
| 143238 | peptidase M13 family protein-                               | 68 | 4  | 6  | 29 | 22 | 43 |
| 14188  | copper-resistance , CopA family protein-                    | 63 | 9  | 13 | 23 | 28 | 55 |
| 104187 | conserved hypothetical protein-                             | 60 | 12 | 17 | 20 | 31 | 61 |
| 214173 | gram-negative pili assembly chaperone, N-terminal domain p  | 60 | 12 | 17 | 20 | 31 | 61 |
| 473661 | rhs element Vgr family protein-                             | 72 | 0  | 0  | 37 | 14 | 27 |
| 595328 | sel1 repeat family protein-                                 | 72 | 0  | 0  | 37 | 14 | 27 |
| 595844 | metal-binding domain of MaoC dehydratase family protein-    | 72 | 0  | 0  | 37 | 14 | 27 |
| 557131 | conserved hypothetical protein-                             | 53 | 19 | 26 | 15 | 36 | 71 |
| 626556 | FCD domain protein-                                         | 53 | 19 | 26 | 15 | 36 | 71 |
| 356339 | copper-resistance , CopA family protein-                    | 64 | 8  | 11 | 25 | 26 | 51 |
| 218850 | conserved hypothetical protein-                             | 71 | 1  | 1  | 35 | 16 | 31 |
| 263969 | nlpC/P60 family protein-                                    | 71 | 1  | 1  | 35 | 16 | 31 |
| 336520 | transposase DDE domain protein-                             | 71 | 1  | 1  | 35 | 16 | 31 |
| 396578 | hypothetical protein-                                       | 71 | 1  | 1  | 35 | 16 | 31 |
| 43994  | phage capsid family protein-                                | 71 | 1  | 1  | 35 | 16 | 31 |
| 481148 | metallo-peptidase M12B Reprolysin-like family protein-      | 71 | 1  | 1  | 35 | 16 | 31 |
| 481907 | conserved hypothetical protein-                             | 71 | 1  | 1  | 35 | 16 | 31 |
| 645253 | conserved hypothetical protein-                             | 71 | 1  | 1  | 35 | 16 | 31 |
| 646916 | zinc-binding dehydrogenase family protein-                  | 71 | 1  | 1  | 35 | 16 | 31 |
| 791178 | conserved hypothetical protein-                             | 71 | 1  | 1  | 35 | 16 | 31 |
| 791179 | conserved hypothetical protein-                             | 71 | 1  | 1  | 35 | 16 | 31 |
| 801954 | conserved hypothetical protein-                             | 71 | 1  | 1  | 35 | 16 | 31 |
| 82923  | putative prophage LambdaSo, tail length tape measure prote  | 71 | 1  | 1  | 35 | 16 | 31 |
| 666612 | miro-like family protein-                                   | 63 | 9  | 13 | 24 | 27 | 53 |
| 143965 | DJ-1/PfpI family protein-                                   | 60 | 12 | 17 | 21 | 30 | 59 |
| 143969 | conserved hypothetical protein-                             | 60 | 12 | 17 | 21 | 30 | 59 |
| 205293 | papC C-terminal domain protein-                             | 60 | 12 | 17 | 21 | 30 | 59 |
| 214174 | spore Coat Protein U domain protein-                        | 60 | 12 | 17 | 21 | 30 | 59 |
| 239046 | conserved hypothetical protein-                             | 60 | 12 | 17 | 21 | 30 | 59 |
| 252203 | DJ-1/PfpI family protein-                                   | 60 | 12 | 17 | 21 | 30 | 59 |
| 469039 | papC C-terminal domain protein-                             | 60 | 12 | 17 | 21 | 30 | 59 |
| 483989 | spore Coat Protein U domain protein-                        | 60 | 12 | 17 | 21 | 30 | 59 |
| 107479 | repressor protein-                                          | 55 | 17 | 24 | 17 | 34 | 67 |

|        |                                                                 |    |    |    |    |    |    |
|--------|-----------------------------------------------------------------|----|----|----|----|----|----|
| 107480 | sugar (and other) transporter family protein-                   | 55 | 17 | 24 | 17 | 34 | 67 |
| 107485 | outer membrane porin, OprD family protein-                      | 55 | 17 | 24 | 17 | 34 | 67 |
| 132707 | acyl-CoA dehydrogenase, N-terminal domain protein-              | 55 | 17 | 24 | 17 | 34 | 67 |
| 147226 | rieske [2Fe-2S] domain protein-                                 | 55 | 17 | 24 | 17 | 34 | 67 |
| 154138 | conserved hypothetical protein-                                 | 55 | 17 | 24 | 17 | 34 | 67 |
| 312686 | methyltransferase, TIGR00027 family protein-                    | 55 | 17 | 24 | 17 | 34 | 67 |
| 324013 | FCD domain protein-                                             | 55 | 17 | 24 | 17 | 34 | 67 |
| 389597 | galactarate dehydratase-                                        | 55 | 17 | 24 | 17 | 34 | 67 |
| 389601 | aldehyde dehydrogenase family protein-                          | 55 | 17 | 24 | 17 | 34 | 67 |
| 389623 | helix-turn-helix domain protein-                                | 55 | 17 | 24 | 17 | 34 | 67 |
| 407645 | flavin-binding monooxygenase-like family protein-               | 55 | 17 | 24 | 17 | 34 | 67 |
| 536636 | aldehyde dehydrogenase family protein-                          | 55 | 17 | 24 | 17 | 34 | 67 |
| 536664 | conserved hypothetical protein-                                 | 55 | 17 | 24 | 17 | 34 | 67 |
| 557106 | 5-dehydro-4-deoxyglucarate dehydratase-                         | 55 | 17 | 24 | 17 | 34 | 67 |
| 557110 | multidrug resistance efflux transporter family protein-         | 55 | 17 | 24 | 17 | 34 | 67 |
| 589505 | glucarate dehydratase-                                          | 55 | 17 | 24 | 17 | 34 | 67 |
| 591857 | AMP-binding enzyme family protein-                              | 55 | 17 | 24 | 17 | 34 | 67 |
| 626526 | hydroxycinnamoyl-CoA hydratase-lyase-                           | 55 | 17 | 24 | 17 | 34 | 67 |
| 626527 | acyl-CoA reductase family protein-                              | 55 | 17 | 24 | 17 | 34 | 67 |
| 667494 | NADH(P)-binding family protein-                                 | 55 | 17 | 24 | 17 | 34 | 67 |
| 685478 | 2Fe-2S iron-sulfur cluster binding domain protein-              | 55 | 17 | 24 | 17 | 34 | 67 |
| 685489 | conserved hypothetical protein-                                 | 55 | 17 | 24 | 17 | 34 | 67 |
| 685490 | alpha/beta hydrolase family protein-                            | 55 | 17 | 24 | 17 | 34 | 67 |
| 685491 | FCD domain protein-                                             | 55 | 17 | 24 | 17 | 34 | 67 |
| 715203 | conserved hypothetical family protein-                          | 43 | 29 | 40 | 9  | 42 | 82 |
| 392482 | ATP-dependent RNA helicase domain protein-                      | 52 | 20 | 28 | 15 | 36 | 71 |
| 336354 | conserved hypothetical protein-                                 | 67 | 5  | 7  | 29 | 22 | 43 |
| 660375 | conserved hypothetical protein-                                 | 67 | 5  | 7  | 29 | 22 | 43 |
| 711136 | conserved hypothetical protein-                                 | 67 | 5  | 7  | 29 | 22 | 43 |
| 337131 | arginine N-succinyltransferase beta subunit-                    | 53 | 19 | 26 | 16 | 35 | 69 |
| 106166 | dTDP-glucose 4,6-dehydratase-                                   | 72 | 0  | 0  | 38 | 13 | 25 |
| 164339 | dTDP-glucose 4,6-dehydratase-                                   | 72 | 0  | 0  | 38 | 13 | 25 |
| 240200 | dTDP-glucose 4,6-dehydratase-                                   | 72 | 0  | 0  | 38 | 13 | 25 |
| 240875 | conserved hypothetical protein-                                 | 72 | 0  | 0  | 38 | 13 | 25 |
| 629007 | NAD dependent epimerase/dehydratase family protein-             | 72 | 0  | 0  | 38 | 13 | 25 |
| 788495 | conserved hypothetical protein-                                 | 72 | 0  | 0  | 38 | 13 | 25 |
| 198594 | peptidase S24-like family protein-                              | 69 | 3  | 4  | 32 | 19 | 37 |
| 250478 | peptidase S24-like family protein-                              | 69 | 3  | 4  | 32 | 19 | 37 |
| 263194 | peptidase S24-like family protein-                              | 69 | 3  | 4  | 32 | 19 | 37 |
| 308576 | peptidase S24-like family protein-                              | 69 | 3  | 4  | 32 | 19 | 37 |
| 3767   | #N/A                                                            | 69 | 3  | 4  | 32 | 19 | 37 |
| 528030 | peptidase S24-like family protein-                              | 69 | 3  | 4  | 32 | 19 | 37 |
| 725153 | peptidase S24-like family protein-                              | 69 | 3  | 4  | 32 | 19 | 37 |
| 730452 | peptidase S24-like family protein-                              | 69 | 3  | 4  | 32 | 19 | 37 |
| 336516 | spore Coat Protein U domain protein-                            | 65 | 7  | 10 | 27 | 24 | 47 |
| 142502 | conserved hypothetical protein-                                 | 71 | 1  | 1  | 36 | 15 | 29 |
| 218847 | conserved hypothetical protein-                                 | 71 | 1  | 1  | 36 | 15 | 29 |
| 235724 | conserved hypothetical protein-                                 | 71 | 1  | 1  | 36 | 15 | 29 |
| 240842 | ATPase associated with various cellular activities family prote | 71 | 1  | 1  | 36 | 15 | 29 |
| 240850 | conserved hypothetical protein-                                 | 71 | 1  | 1  | 36 | 15 | 29 |
| 255270 | ribonucleotide reductase, small chain family protein-           | 71 | 1  | 1  | 36 | 15 | 29 |
| 359682 | mazG nucleotide pyrophosphohydrolase domain protein-            | 71 | 1  | 1  | 36 | 15 | 29 |
| 470943 | acyltransferase family protein-                                 | 71 | 1  | 1  | 36 | 15 | 29 |
| 483050 | alpha/beta hydrolase fold family protein-                       | 71 | 1  | 1  | 36 | 15 | 29 |
| 489418 | conserved hypothetical protein-                                 | 71 | 1  | 1  | 36 | 15 | 29 |
| 542196 | mazG nucleotide pyrophosphohydrolase domain protein-            | 71 | 1  | 1  | 36 | 15 | 29 |
| 646582 | conserved hypothetical protein-                                 | 71 | 1  | 1  | 36 | 15 | 29 |
| 205294 | spore Coat Protein U domain protein-                            | 60 | 12 | 17 | 22 | 29 | 57 |
| 132697 | sugar (and other) transporter family protein-                   | 55 | 17 | 24 | 18 | 33 | 65 |
| 389619 | FAD dependent oxidoreductase family protein-                    | 55 | 17 | 24 | 18 | 33 | 65 |
| 667471 | putative glucarate transporter-                                 | 55 | 17 | 24 | 18 | 33 | 65 |
| 685475 | outer membrane porin, OprD family protein-                      | 55 | 17 | 24 | 18 | 33 | 65 |
| 688197 | arginine N-succinyltransferase-                                 | 55 | 17 | 24 | 18 | 33 | 65 |
| 2629   | #N/A                                                            | 59 | 13 | 18 | 21 | 30 | 59 |
| 302562 | copper resistance D family protein-                             | 59 | 13 | 18 | 21 | 30 | 59 |
| 471764 | copper resistance D family protein-                             | 59 | 13 | 18 | 21 | 30 | 59 |
| 630960 | copper resistance D family protein-                             | 59 | 13 | 18 | 21 | 30 | 59 |
| 145874 | copper-translocating P-type ATPase-                             | 58 | 14 | 19 | 21 | 30 | 59 |
| 163706 | copC domain protein-                                            | 58 | 14 | 19 | 21 | 30 | 59 |
| 260969 | copper-translocating P-type ATPase-                             | 58 | 14 | 19 | 21 | 30 | 59 |
| 359672 | copper-translocating P-type ATPase-                             | 58 | 14 | 19 | 21 | 30 | 59 |
| 44315  | copper-translocating P-type ATPase-                             | 58 | 14 | 19 | 21 | 30 | 59 |
| 614970 | copC domain protein-                                            | 58 | 14 | 19 | 21 | 30 | 59 |
| 630958 | copper-translocating P-type ATPase-                             | 58 | 14 | 19 | 21 | 30 | 59 |
| 752269 | copC domain protein-                                            | 58 | 14 | 19 | 21 | 30 | 59 |
| 800985 | copC domain protein-                                            | 58 | 14 | 19 | 21 | 30 | 59 |
| 696839 | bacterial regulatory, tetR family protein-                      | 46 | 26 | 36 | 12 | 39 | 76 |
| 164334 | glycosyl transferases group 1 family protein-                   | 72 | 0  | 0  | 39 | 12 | 24 |
| 166585 | tettrapeptide repeat family protein-                            | 72 | 0  | 0  | 39 | 12 | 24 |
| 2134   | #N/A                                                            | 72 | 0  | 0  | 39 | 12 | 24 |
| 241151 | glycosyl transferase 2 family protein-                          | 72 | 0  | 0  | 39 | 12 | 24 |
| 334101 | glycosyl transferase 2 family protein-                          | 72 | 0  | 0  | 39 | 12 | 24 |
| 334106 | mitochondrial fission ELM1 family protein-                      | 72 | 0  | 0  | 39 | 12 | 24 |
| 359361 | mitochondrial fission ELM1 family protein-                      | 72 | 0  | 0  | 39 | 12 | 24 |
| 543183 | sel1 repeat family protein-                                     | 72 | 0  | 0  | 39 | 12 | 24 |
| 629002 | glycosyl transferase 2 family protein-                          | 72 | 0  | 0  | 39 | 12 | 24 |
| 100804 | pseudaminic acid CMP-transferase-                               | 70 | 2  | 3  | 35 | 16 | 31 |
| 100807 | pseudaminic acid synthase-                                      | 70 | 2  | 3  | 35 | 16 | 31 |
| 255316 | pseudaminic acid synthase-                                      | 70 | 2  | 3  | 35 | 16 | 31 |

|        |                                                             |    |    |    |    |    |    |
|--------|-------------------------------------------------------------|----|----|----|----|----|----|
| 511553 | pseudaminic acid synthase-                                  | 70 | 2  | 3  | 35 | 16 | 31 |
| 662835 | UDP-N-acetylglucosamine 4,6-dehydratase-                    | 70 | 2  | 3  | 35 | 16 | 31 |
| 674582 | pseudaminic acid CMP-transferase-                           | 70 | 2  | 3  | 35 | 16 | 31 |
| 698803 | UDP-4-keto-6-deoxy-N-acetylglucosamine 4-aminotransferase-  | 70 | 2  | 3  | 35 | 16 | 31 |
| 215352 | lysR substrate binding domain protein-                      | 56 | 16 | 22 | 19 | 32 | 63 |
| 585498 | tonB dependent receptor family protein-                     | 68 | 4  | 6  | 32 | 19 | 37 |
| 141506 | conserved hypothetical protein-                             | 71 | 1  | 1  | 37 | 14 | 27 |
| 235634 | uracil DNA glycosylase superfamily protein-                 | 71 | 1  | 1  | 37 | 14 | 27 |
| 240824 | 5'-3' exonuclease, C-terminal SAM fold family protein-      | 71 | 1  | 1  | 37 | 14 | 27 |
| 255271 | ribonucleoside-diphosphate reductase, alpha subunit-        | 71 | 1  | 1  | 37 | 14 | 27 |
| 396883 | conserved hypothetical protein-                             | 71 | 1  | 1  | 37 | 14 | 27 |
| 399772 | putative thymidylate synthase ThyX-                         | 71 | 1  | 1  | 37 | 14 | 27 |
| 399773 | conserved hypothetical protein-                             | 71 | 1  | 1  | 37 | 14 | 27 |
| 44040  | intein C-terminal splicing region domain protein-           | 71 | 1  | 1  | 37 | 14 | 27 |
| 44057  | ribonucleotide reductase, small chain family protein-       | 71 | 1  | 1  | 37 | 14 | 27 |
| 455167 | conserved hypothetical protein-                             | 71 | 1  | 1  | 37 | 14 | 27 |
| 455180 | conserved hypothetical protein-                             | 71 | 1  | 1  | 37 | 14 | 27 |
| 489382 | recF/RecN/SMC N terminal domain protein-                    | 71 | 1  | 1  | 37 | 14 | 27 |
| 542203 | conserved hypothetical protein-                             | 71 | 1  | 1  | 37 | 14 | 27 |
| 542204 | conserved hypothetical protein-                             | 71 | 1  | 1  | 37 | 14 | 27 |
| 542208 | calcineurin-like phosphoesterase superfamily domain protein | 71 | 1  | 1  | 37 | 14 | 27 |
| 644560 | malonate transporter, MadM subunit-                         | 71 | 1  | 1  | 37 | 14 | 27 |
| 713016 | conserved hypothetical protein-                             | 71 | 1  | 1  | 37 | 14 | 27 |
| 717788 | integrase core domain protein-                              | 71 | 1  | 1  | 37 | 14 | 27 |
| 780755 | conserved hypothetical protein-                             | 71 | 1  | 1  | 37 | 14 | 27 |
| 781633 | conserved hypothetical protein-                             | 71 | 1  | 1  | 37 | 14 | 27 |
| 83108  | conserved hypothetical protein-                             | 71 | 1  | 1  | 37 | 14 | 27 |
| 83767  | conserved hypothetical protein-                             | 71 | 1  | 1  | 37 | 14 | 27 |
| 630956 | response regulator-                                         | 59 | 13 | 18 | 22 | 29 | 57 |
| 752272 | response regulator-                                         | 59 | 13 | 18 | 22 | 29 | 57 |
| 84205  | response regulator-                                         | 59 | 13 | 18 | 22 | 29 | 57 |
| 164836 | sugar (and other) transporter family protein-               | 55 | 17 | 24 | 19 | 32 | 63 |
| 462004 | amino acid permease family protein-                         | 55 | 17 | 24 | 19 | 32 | 63 |
| 118361 | heavy metal sensor kinase family protein-                   | 58 | 14 | 19 | 22 | 29 | 57 |
| 248814 | heavy metal sensor kinase family protein-                   | 58 | 14 | 19 | 22 | 29 | 57 |
| 347462 | heavy metal sensor kinase family protein-                   | 58 | 14 | 19 | 22 | 29 | 57 |
| 454625 | heavy metal sensor kinase family protein-                   | 58 | 14 | 19 | 22 | 29 | 57 |
| 550336 | response regulator-                                         | 58 | 14 | 19 | 22 | 29 | 57 |
| 630957 | heavy metal sensor kinase family protein-                   | 58 | 14 | 19 | 22 | 29 | 57 |
| 799993 | multicopper oxidase family protein-                         | 58 | 14 | 19 | 22 | 29 | 57 |
| 215351 | chrR Cupin-like domain protein-                             | 56 | 16 | 22 | 20 | 31 | 61 |
| 42217  | bacterial sugar transferase family protein-                 | 56 | 16 | 22 | 20 | 31 | 61 |
| 788090 | bacterial sugar transferase family protein-                 | 56 | 16 | 22 | 20 | 31 | 61 |
| 156105 | doxX family protein-                                        | 63 | 9  | 13 | 27 | 24 | 47 |
| 35213  | bacterial regulatory, tetR family protein-                  | 63 | 9  | 13 | 27 | 24 | 47 |
| 1700   | #N/A                                                        | 70 | 2  | 3  | 36 | 15 | 29 |
| 278937 | conserved hypothetical protein-                             | 70 | 2  | 3  | 36 | 15 | 29 |
| 337431 | HTH-like domain protein-                                    | 70 | 2  | 3  | 36 | 15 | 29 |
| 589033 | rhs element Vgr family domain protein-                      | 70 | 2  | 3  | 36 | 15 | 29 |
| 660374 | conserved hypothetical protein-                             | 70 | 2  | 3  | 36 | 15 | 29 |
| 102452 | curli production assembly/transport component CsgG family   | 72 | 0  | 0  | 40 | 11 | 22 |
| 106167 | dTDP-4-dehydrorhamnose reductase-                           | 72 | 0  | 0  | 40 | 11 | 22 |
| 106168 | glucose-1-phosphate thymidyltransferase-                    | 72 | 0  | 0  | 40 | 11 | 22 |
| 106169 | dTDP-4-dehydrorhamnose 3,5-epimerase-                       | 72 | 0  | 0  | 40 | 11 | 22 |
| 106444 | integrase domain protein-                                   | 72 | 0  | 0  | 40 | 11 | 22 |
| 164336 | dTDP-4-dehydrorhamnose 3,5-epimerase-                       | 72 | 0  | 0  | 40 | 11 | 22 |
| 164338 | dTDP-4-dehydrorhamnose reductase-                           | 72 | 0  | 0  | 40 | 11 | 22 |
| 254207 | conserved hypothetical protein-                             | 72 | 0  | 0  | 40 | 11 | 22 |
| 3418   | #N/A                                                        | 72 | 0  | 0  | 40 | 11 | 22 |
| 455186 | HNH endonuclease family protein-                            | 72 | 0  | 0  | 40 | 11 | 22 |
| 516412 | conserved hypothetical protein-                             | 72 | 0  | 0  | 40 | 11 | 22 |
| 597260 | type VI secretion system Rhs element Vgr family protein-    | 72 | 0  | 0  | 40 | 11 | 22 |
| 629003 | nucleotidyl transferase family protein-                     | 72 | 0  | 0  | 40 | 11 | 22 |
| 698003 | glucose-1-phosphate thymidyltransferase-                    | 72 | 0  | 0  | 40 | 11 | 22 |
| 713232 | putative lipoprotein-                                       | 72 | 0  | 0  | 40 | 11 | 22 |
| 713233 | putative lipoprotein NMB1124/NMB1162-                       | 72 | 0  | 0  | 40 | 11 | 22 |
| 145870 | copper-resistance, CopA family protein-                     | 59 | 13 | 18 | 23 | 28 | 55 |
| 630954 | copper-resistance, CopA family protein-                     | 59 | 13 | 18 | 23 | 28 | 55 |
| 139016 | conserved hypothetical protein-                             | 62 | 10 | 14 | 26 | 25 | 49 |
| 139711 | phage/plasmid-like TIGR03299 family protein-                | 62 | 10 | 14 | 26 | 25 | 49 |
| 142772 | phage/plasmid-like TIGR03299 family protein-                | 62 | 10 | 14 | 26 | 25 | 49 |
| 200431 | phage/plasmid-like TIGR03299 family protein-                | 62 | 10 | 14 | 26 | 25 | 49 |
| 21645  | #N/A                                                        | 62 | 10 | 14 | 26 | 25 | 49 |
| 254669 | phage/plasmid-like TIGR03299 family protein-                | 62 | 10 | 14 | 26 | 25 | 49 |
| 317769 | phage/plasmid-like TIGR03299 family protein-                | 62 | 10 | 14 | 26 | 25 | 49 |
| 320036 | phage/plasmid-like TIGR03299 family protein-                | 62 | 10 | 14 | 26 | 25 | 49 |
| 320108 | phage/plasmid-like TIGR03299 family protein-                | 62 | 10 | 14 | 26 | 25 | 49 |
| 413677 | phage/plasmid-like TIGR03299 family protein-                | 62 | 10 | 14 | 26 | 25 | 49 |
| 474876 | phage/plasmid-like TIGR03299 family protein-                | 62 | 10 | 14 | 26 | 25 | 49 |
| 510057 | phage/plasmid-like TIGR03299 family protein-                | 62 | 10 | 14 | 26 | 25 | 49 |
| 518459 | phage/plasmid-like TIGR03299 family protein-                | 62 | 10 | 14 | 26 | 25 | 49 |
| 577791 | phage/plasmid-like TIGR03299 family protein-                | 62 | 10 | 14 | 26 | 25 | 49 |
| 598705 | phage/plasmid-like TIGR03299 family protein-                | 62 | 10 | 14 | 26 | 25 | 49 |
| 600142 | phage/plasmid-like TIGR03299 family protein-                | 62 | 10 | 14 | 26 | 25 | 49 |
| 629707 | phage/plasmid-like TIGR03299 family protein-                | 62 | 10 | 14 | 26 | 25 | 49 |
| 629795 | conserved hypothetical protein-                             | 62 | 10 | 14 | 26 | 25 | 49 |
| 630529 | phage/plasmid-like TIGR03299 family protein-                | 62 | 10 | 14 | 26 | 25 | 49 |
| 645597 | phage/plasmid-like TIGR03299 family protein-                | 62 | 10 | 14 | 26 | 25 | 49 |
| 688215 | phage/plasmid-like TIGR03299 family protein-                | 62 | 10 | 14 | 26 | 25 | 49 |

|        |                                                                |    |    |    |    |    |    |
|--------|----------------------------------------------------------------|----|----|----|----|----|----|
| 717436 | phage/plasmid-like TIGR03299 family protein-                   | 62 | 10 | 14 | 26 | 25 | 49 |
| 788737 | phage/plasmid-like TIGR03299 family protein-                   | 62 | 10 | 14 | 26 | 25 | 49 |
| 802053 | phage/plasmid-like TIGR03299 family protein-                   | 62 | 10 | 14 | 26 | 25 | 49 |
| 85102  | phage/plasmid-like TIGR03299 family protein-                   | 62 | 10 | 14 | 26 | 25 | 49 |
| 319997 | bacterial regulatory, tetR family protein-                     | 54 | 18 | 25 | 19 | 32 | 63 |
| 163968 | filamentous hemagglutinin family N-terminal domain protein     | 71 | 1  | 1  | 38 | 13 | 25 |
| 392712 | intein C-terminal splicing region domain protein-              | 71 | 1  | 1  | 38 | 13 | 25 |
| 474878 | conserved hypothetical protein-                                | 71 | 1  | 1  | 38 | 13 | 25 |
| 483049 | helix-turn-helix domain protein-                               | 71 | 1  | 1  | 38 | 13 | 25 |
| 582996 | acetyltransferase family protein-                              | 71 | 1  | 1  | 38 | 13 | 25 |
| 646915 | glutathione S-transferase, N-terminal domain protein-          | 71 | 1  | 1  | 38 | 13 | 25 |
| 29505  | type I phosphodiesterase / nucleotide pyrophosphatase famil    | 64 | 8  | 11 | 28 | 23 | 45 |
| 697611 | outer membrane porin, OprD family protein-                     | 64 | 8  | 11 | 28 | 23 | 45 |
| 790153 | formylglycine-generating sulfatase enzyme family protein-      | 64 | 8  | 11 | 28 | 23 | 45 |
| 165191 | conserved hypothetical protein-                                | 67 | 5  | 7  | 32 | 19 | 37 |
| 354276 | peptidase S24-like family protein-                             | 69 | 3  | 4  | 35 | 16 | 31 |
| 481578 | copper binding periplasmic CusF family protein-                | 69 | 3  | 4  | 35 | 16 | 31 |
| 787868 | hypothetical protein-                                          | 63 | 9  | 13 | 28 | 23 | 45 |
| 142556 | low molecular weight phosphotyrosine phosphatase family p1     | 70 | 2  | 3  | 37 | 14 | 27 |
| 255320 | glycosyl transferase 2 family protein-                         | 70 | 2  | 3  | 37 | 14 | 27 |
| 336278 | helix-turn-helix domain protein-                               | 70 | 2  | 3  | 37 | 14 | 27 |
| 441197 | low molecular weight phosphotyrosine phosphatase family p1     | 70 | 2  | 3  | 37 | 14 | 27 |
| 482345 | DDE domain protein-                                            | 70 | 2  | 3  | 37 | 14 | 27 |
| 674280 | transposase family protein-                                    | 70 | 2  | 3  | 37 | 14 | 27 |
| 698793 | glycosyl transferase 2 family protein-                         | 70 | 2  | 3  | 37 | 14 | 27 |
| 752287 | low molecular weight phosphotyrosine phosphatase family p1     | 70 | 2  | 3  | 37 | 14 | 27 |
| 788091 | glycosyl transferase 2 family protein-                         | 70 | 2  | 3  | 37 | 14 | 27 |
| 661537 | conserved hypothetical protein-                                | 40 | 32 | 44 | 10 | 41 | 80 |
| 185563 | bacterial regulatory, tetR family protein-                     | 53 | 19 | 26 | 19 | 32 | 63 |
| 13779  | #N/A                                                           | 64 | 8  | 11 | 29 | 22 | 43 |
| 337448 | bacterial regulatory, tetR family protein-                     | 64 | 8  | 11 | 29 | 22 | 43 |
| 105242 | HTH-like domain protein-                                       | 72 | 0  | 0  | 41 | 10 | 20 |
| 183351 | conserved hypothetical protein-                                | 72 | 0  | 0  | 41 | 10 | 20 |
| 198593 | conserved hypothetical protein-                                | 72 | 0  | 0  | 41 | 10 | 20 |
| 240783 | rhs element Vgr family protein-                                | 72 | 0  | 0  | 41 | 10 | 20 |
| 320277 | transposase family protein-                                    | 72 | 0  | 0  | 41 | 10 | 20 |
| 397737 | prokaryotic E2 B family protein-                               | 72 | 0  | 0  | 41 | 10 | 20 |
| 455336 | transposase family protein-                                    | 72 | 0  | 0  | 41 | 10 | 20 |
| 581735 | conserved hypothetical protein-                                | 72 | 0  | 0  | 41 | 10 | 20 |
| 583486 | putative integrase-                                            | 72 | 0  | 0  | 41 | 10 | 20 |
| 629584 | conserved hypothetical protein-                                | 72 | 0  | 0  | 41 | 10 | 20 |
| 629686 | putative outer membrane protein-                               | 72 | 0  | 0  | 41 | 10 | 20 |
| 718443 | conserved hypothetical protein-                                | 72 | 0  | 0  | 41 | 10 | 20 |
| 718475 | beta-lactamase family protein-                                 | 72 | 0  | 0  | 41 | 10 | 20 |
| 720052 | conserved hypothetical protein-                                | 72 | 0  | 0  | 41 | 10 | 20 |
| 730454 | conserved hypothetical protein-                                | 72 | 0  | 0  | 41 | 10 | 20 |
| 799900 | integrase domain protein-                                      | 72 | 0  | 0  | 41 | 10 | 20 |
| 802051 | conserved hypothetical protein-                                | 72 | 0  | 0  | 41 | 10 | 20 |
| 240267 | conserved hypothetical protein-                                | 71 | 1  | 1  | 39 | 12 | 24 |
| 254816 | conserved hypothetical protein-                                | 71 | 1  | 1  | 39 | 12 | 24 |
| 336997 | transposase DDE domain protein-                                | 71 | 1  | 1  | 39 | 12 | 24 |
| 338220 | phage minor tail protein L-                                    | 71 | 1  | 1  | 39 | 12 | 24 |
| 46190  | alcohol dehydrogenase superfamily, zinc-containing-            | 71 | 1  | 1  | 39 | 12 | 24 |
| 469083 | conserved hypothetical protein-                                | 71 | 1  | 1  | 39 | 12 | 24 |
| 475198 | bacteriophage lambda tail assembly I family protein-           | 71 | 1  | 1  | 39 | 12 | 24 |
| 475584 | phage minor tail protein L-                                    | 71 | 1  | 1  | 39 | 12 | 24 |
| 515387 | inhibitor of g-type lysozyme-                                  | 71 | 1  | 1  | 39 | 12 | 24 |
| 566189 | zinc-binding dehydrogenase family protein-                     | 71 | 1  | 1  | 39 | 12 | 24 |
| 646616 | conserved hypothetical protein-                                | 71 | 1  | 1  | 39 | 12 | 24 |
| 712619 | conserved hypothetical protein-                                | 71 | 1  | 1  | 39 | 12 | 24 |
| 747554 | phage minor tail protein L-                                    | 71 | 1  | 1  | 39 | 12 | 24 |
| 475202 | phage minor tail family protein-                               | 69 | 3  | 4  | 36 | 15 | 29 |
| 475586 | phage minor tail family protein-                               | 69 | 3  | 4  | 36 | 15 | 29 |
| 791457 | phage minor tail family protein-                               | 69 | 3  | 4  | 36 | 15 | 29 |
| 801171 | conserved hypothetical protein-                                | 69 | 3  | 4  | 36 | 15 | 29 |
| 104439 | stress-induced bacterial acidophilic repeat motif family prote | 62 | 10 | 14 | 28 | 23 | 45 |
| 158162 | stress-induced bacterial acidophilic repeat motif family prote | 62 | 10 | 14 | 28 | 23 | 45 |
| 155416 | ferrous iron transport protein B-                              | 58 | 14 | 19 | 24 | 27 | 53 |
| 258407 | feoA domain protein-                                           | 58 | 14 | 19 | 24 | 27 | 53 |
| 44304  | ferrous iron transport protein B-                              | 58 | 14 | 19 | 24 | 27 | 53 |
| 631543 | feoA domain protein-                                           | 58 | 14 | 19 | 24 | 27 | 53 |
| 102882 | DDE domain protein-                                            | 72 | 0  | 0  | 42 | 9  | 18 |
| 104366 | conserved hypothetical protein-                                | 72 | 0  | 0  | 42 | 9  | 18 |
| 139362 | conserved hypothetical protein-                                | 72 | 0  | 0  | 42 | 9  | 18 |
| 185117 | conserved hypothetical protein-                                | 72 | 0  | 0  | 42 | 9  | 18 |
| 185137 | phage integrase family protein-                                | 72 | 0  | 0  | 42 | 9  | 18 |
| 240075 | lysR substrate binding domain protein-                         | 72 | 0  | 0  | 42 | 9  | 18 |
| 2535   | #N/A                                                           | 72 | 0  | 0  | 42 | 9  | 18 |
| 254612 | cobQ/CobB/MinD/ParA nucleotide binding domain protein-         | 72 | 0  | 0  | 42 | 9  | 18 |
| 263231 | phage integrase family protein-                                | 72 | 0  | 0  | 42 | 9  | 18 |
| 306307 | conserved hypothetical protein-                                | 72 | 0  | 0  | 42 | 9  | 18 |
| 333100 | phage integrase family protein-                                | 72 | 0  | 0  | 42 | 9  | 18 |
| 347335 | pilus subunit FilA domain protein-                             | 72 | 0  | 0  | 42 | 9  | 18 |
| 347357 | conserved hypothetical protein-                                | 72 | 0  | 0  | 42 | 9  | 18 |
| 356250 | conserved hypothetical protein-                                | 72 | 0  | 0  | 42 | 9  | 18 |
| 358223 | L(+)-tartrate dehydratase subunit beta-                        | 72 | 0  | 0  | 42 | 9  | 18 |
| 359582 | conserved hypothetical protein-                                | 72 | 0  | 0  | 42 | 9  | 18 |
| 359595 | phage integrase family protein-                                | 72 | 0  | 0  | 42 | 9  | 18 |
| 398786 | conserved hypothetical protein-                                | 72 | 0  | 0  | 42 | 9  | 18 |

|        |                                                                |    |    |    |    |    |    |
|--------|----------------------------------------------------------------|----|----|----|----|----|----|
| 398787 | conserved hypothetical protein-                                | 72 | 0  | 0  | 42 | 9  | 18 |
| 441712 | vacuole effluxer Atg22 like family protein-                    | 72 | 0  | 0  | 42 | 9  | 18 |
| 452339 | conserved hypothetical protein-                                | 72 | 0  | 0  | 42 | 9  | 18 |
| 472126 | phage integrase family protein-                                | 72 | 0  | 0  | 42 | 9  | 18 |
| 583453 | cobQ/CobB/MinD/ParA nucleotide binding domain protein-         | 72 | 0  | 0  | 42 | 9  | 18 |
| 628837 | cobQ/CobB/MinD/ParA nucleotide binding domain protein-         | 72 | 0  | 0  | 42 | 9  | 18 |
| 629269 | homeo-like domain protein-                                     | 72 | 0  | 0  | 42 | 9  | 18 |
| 716453 | phage integrase family protein-                                | 72 | 0  | 0  | 42 | 9  | 18 |
| 718151 | hydrolyase, tartrate alpha subunit/fumarate, Fe-S type doma    | 72 | 0  | 0  | 42 | 9  | 18 |
| 718404 | helix-turn-helix domain protein-                               | 72 | 0  | 0  | 42 | 9  | 18 |
| 718406 | conserved hypothetical protein-                                | 72 | 0  | 0  | 42 | 9  | 18 |
| 725155 | conserved hypothetical protein-                                | 72 | 0  | 0  | 42 | 9  | 18 |
| 729518 | conserved hypothetical protein-                                | 72 | 0  | 0  | 42 | 9  | 18 |
| 98406  | helix-turn-helix domain protein-                               | 72 | 0  | 0  | 42 | 9  | 18 |
| 98948  | phage integrase family protein-                                | 72 | 0  | 0  | 42 | 9  | 18 |
| 98949  | conserved hypothetical protein-                                | 72 | 0  | 0  | 42 | 9  | 18 |
| 31218  | acetyltransferase family protein-                              | 63 | 9  | 13 | 29 | 22 | 43 |
| 338968 | acetyltransferase family protein-                              | 63 | 9  | 13 | 29 | 22 | 43 |
| 105711 | glutamate racemase domain protein-                             | 71 | 1  | 1  | 40 | 11 | 22 |
| 200433 | conserved hypothetical protein-                                | 71 | 1  | 1  | 40 | 11 | 22 |
| 200489 | phage minor tail protein L-                                    | 71 | 1  | 1  | 40 | 11 | 22 |
| 254096 | conserved hypothetical protein-                                | 71 | 1  | 1  | 40 | 11 | 22 |
| 356337 | hypothetical protein-                                          | 71 | 1  | 1  | 40 | 11 | 22 |
| 47489  | malonate transporter, MadL subunit-                            | 71 | 1  | 1  | 40 | 11 | 22 |
| 483981 | phage minor tail protein L-                                    | 71 | 1  | 1  | 40 | 11 | 22 |
| 489344 | conserved hypothetical protein-                                | 71 | 1  | 1  | 40 | 11 | 22 |
| 542210 | conserved hypothetical protein-                                | 71 | 1  | 1  | 40 | 11 | 22 |
| 565502 | conserved hypothetical protein-                                | 71 | 1  | 1  | 40 | 11 | 22 |
| 629616 | virulence protein STM3117-                                     | 71 | 1  | 1  | 40 | 11 | 22 |
| 696411 | conserved hypothetical protein-                                | 71 | 1  | 1  | 40 | 11 | 22 |
| 779934 | conserved hypothetical protein-                                | 71 | 1  | 1  | 40 | 11 | 22 |
| 791455 | phage minor tail protein L-                                    | 71 | 1  | 1  | 40 | 11 | 22 |
| 82930  | conserved hypothetical protein-                                | 71 | 1  | 1  | 40 | 11 | 22 |
| 109702 | tonB-dependent siderophore receptor family protein-            | 56 | 16 | 22 | 23 | 28 | 55 |
| 213963 | efflux transporter, RND family, MFP subunit-                   | 69 | 3  | 4  | 37 | 14 | 27 |
| 213964 | outer membrane efflux family protein-                          | 69 | 3  | 4  | 37 | 14 | 27 |
| 317740 | phage/plasmid-like TIGR03299 family protein-                   | 69 | 3  | 4  | 37 | 14 | 27 |
| 358727 | outer membrane efflux family protein-                          | 69 | 3  | 4  | 37 | 14 | 27 |
| 645587 | outer membrane efflux family protein-                          | 69 | 3  | 4  | 37 | 14 | 27 |
| 745855 | conserved hypothetical protein-                                | 69 | 3  | 4  | 37 | 14 | 27 |
| 105358 | arsenical resistance protein ArsH-                             | 70 | 2  | 3  | 38 | 13 | 25 |
| 142554 | arsenate reductase-                                            | 70 | 2  | 3  | 38 | 13 | 25 |
| 184951 | arsenate reductase-                                            | 70 | 2  | 3  | 38 | 13 | 25 |
| 441194 | NADPH-dependent FMN reductase family protein-                  | 70 | 2  | 3  | 38 | 13 | 25 |
| 469289 | transposase family protein-                                    | 70 | 2  | 3  | 38 | 13 | 25 |
| 788827 | arsenical resistance protein ArsH-                             | 70 | 2  | 3  | 38 | 13 | 25 |
| 200613 | phage/plasmid-like TIGR03299 family protein-                   | 62 | 10 | 14 | 29 | 22 | 43 |
| 176136 | cd(II)/Pb(II)-responsive transcriptional regulator-            | 58 | 14 | 19 | 25 | 26 | 51 |
| 2636   | #N/A                                                           | 58 | 14 | 19 | 25 | 26 | 51 |
| 320028 | copper resistance B family protein-                            | 58 | 14 | 19 | 25 | 26 | 51 |
| 440489 | copper resistance B family protein-                            | 58 | 14 | 19 | 25 | 26 | 51 |
| 471757 | copper resistance B family protein-                            | 58 | 14 | 19 | 25 | 26 | 51 |
| 594026 | heavy-metal-associated domain protein-                         | 58 | 14 | 19 | 25 | 26 | 51 |
| 542702 | conserved hypothetical protein-                                | 53 | 19 | 26 | 21 | 30 | 59 |
| 730683 | stress-induced bacterial acidophilic repeat motif family prote | 61 | 11 | 15 | 28 | 23 | 45 |
| 121178 | putative darcynin 2-                                           | 60 | 12 | 17 | 27 | 24 | 47 |
| 2642   | #N/A                                                           | 60 | 12 | 17 | 27 | 24 | 47 |
| 102316 | conserved hypothetical protein-                                | 72 | 0  | 0  | 43 | 8  | 16 |
| 102317 | pre-toxin domain with VENN motif family protein-               | 72 | 0  | 0  | 43 | 8  | 16 |
| 140775 | prophage CP4-57 regulatory family protein-                     | 72 | 0  | 0  | 43 | 8  | 16 |
| 141573 | conserved hypothetical protein-                                | 72 | 0  | 0  | 43 | 8  | 16 |
| 166893 | major Facilitator Superfamily protein-                         | 72 | 0  | 0  | 43 | 8  | 16 |
| 22726  | #N/A                                                           | 72 | 0  | 0  | 43 | 8  | 16 |
| 250282 | conserved hypothetical protein-                                | 72 | 0  | 0  | 43 | 8  | 16 |
| 254666 | conserved hypothetical protein-                                | 72 | 0  | 0  | 43 | 8  | 16 |
| 2939   | #N/A                                                           | 72 | 0  | 0  | 43 | 8  | 16 |
| 316762 | conserved hypothetical protein-                                | 72 | 0  | 0  | 43 | 8  | 16 |
| 317823 | integrase core domain protein-                                 | 72 | 0  | 0  | 43 | 8  | 16 |
| 318068 | CRISPR-associated family protein-                              | 72 | 0  | 0  | 43 | 8  | 16 |
| 318070 | CRISPR-associated family protein-                              | 72 | 0  | 0  | 43 | 8  | 16 |
| 334967 | conserved hypothetical protein-                                | 72 | 0  | 0  | 43 | 8  | 16 |
| 335618 | CRISPR-associated family protein-                              | 72 | 0  | 0  | 43 | 8  | 16 |
| 336253 | P-loop domain protein-                                         | 72 | 0  | 0  | 43 | 8  | 16 |
| 356957 | conserved hypothetical protein-                                | 72 | 0  | 0  | 43 | 8  | 16 |
| 359563 | hxlR-like helix-turn-helix family protein-                     | 72 | 0  | 0  | 43 | 8  | 16 |
| 392673 | transposase family protein-                                    | 72 | 0  | 0  | 43 | 8  | 16 |
| 397552 | conserved hypothetical protein-                                | 72 | 0  | 0  | 43 | 8  | 16 |
| 398780 | conserved hypothetical protein-                                | 72 | 0  | 0  | 43 | 8  | 16 |
| 412733 | alkylhydroperoxidase AhpD family core domain protein-          | 72 | 0  | 0  | 43 | 8  | 16 |
| 440778 | conserved hypothetical protein-                                | 72 | 0  | 0  | 43 | 8  | 16 |
| 453874 | transposase DDE domain protein-                                | 72 | 0  | 0  | 43 | 8  | 16 |
| 455257 | conserved hypothetical protein-                                | 72 | 0  | 0  | 43 | 8  | 16 |
| 502958 | CRISPR-associated protein Csy3-                                | 72 | 0  | 0  | 43 | 8  | 16 |
| 599256 | conserved hypothetical protein-                                | 72 | 0  | 0  | 43 | 8  | 16 |
| 630523 | conserved hypothetical protein-                                | 72 | 0  | 0  | 43 | 8  | 16 |
| 696465 | conserved hypothetical protein-                                | 72 | 0  | 0  | 43 | 8  | 16 |
| 714714 | conserved hypothetical protein-                                | 72 | 0  | 0  | 43 | 8  | 16 |
| 716601 | phage integrase domain protein-                                | 72 | 0  | 0  | 43 | 8  | 16 |
| 716754 | conserved hypothetical protein-                                | 72 | 0  | 0  | 43 | 8  | 16 |

|        |                                             |    |   |    |    |    |    |
|--------|---------------------------------------------|----|---|----|----|----|----|
| 716771 | phage integrase family protein-             | 72 | 0 | 0  | 43 | 8  | 16 |
| 718402 | conserved hypothetical protein-             | 72 | 0 | 0  | 43 | 8  | 16 |
| 719454 | CRISPR-associated endonuclease Cas1-        | 72 | 0 | 0  | 43 | 8  | 16 |
| 729524 | haemagglutinin repeat family protein-       | 72 | 0 | 0  | 43 | 8  | 16 |
| 790957 | putative cRISPR-associated helicase Cas3-   | 72 | 0 | 0  | 43 | 8  | 16 |
| 790958 | putative helicase-                          | 72 | 0 | 0  | 43 | 8  | 16 |
| 79562  | conserved hypothetical protein-             | 72 | 0 | 0  | 43 | 8  | 16 |
| 182746 | hypothetical protein-                       | 71 | 1 | 1  | 41 | 10 | 20 |
| 356334 | metallo-beta-lactamase superfamily protein- | 71 | 1 | 1  | 41 | 10 | 20 |
| 455478 | putative transcriptional regulator-         | 71 | 1 | 1  | 41 | 10 | 20 |
| 471052 | putative transcriptional regulator-         | 71 | 1 | 1  | 41 | 10 | 20 |
| 630955 | conserved hypothetical protein-             | 71 | 1 | 1  | 41 | 10 | 20 |
| 645588 | putative predicted protein-                 | 71 | 1 | 1  | 41 | 10 | 20 |
| 780037 | conserved hypothetical protein-             | 71 | 1 | 1  | 41 | 10 | 20 |
| 800402 | conserved hypothetical protein-             | 71 | 1 | 1  | 41 | 10 | 20 |
| 801008 | conserved hypothetical protein-             | 71 | 1 | 1  | 41 | 10 | 20 |
| 85685  | conserved hypothetical protein-             | 71 | 1 | 1  | 41 | 10 | 20 |
| 469082 | conserved hypothetical protein-             | 69 | 3 | 4  | 38 | 13 | 25 |
| 518435 | description family protein-                 | 69 | 3 | 4  | 38 | 13 | 25 |
| 211120 | putative upf86.8-                           | 70 | 2 | 3  | 39 | 12 | 24 |
| 211122 | conserved hypothetical protein-             | 70 | 2 | 3  | 39 | 12 | 24 |
| 455062 | putative upf86.8-                           | 70 | 2 | 3  | 39 | 12 | 24 |
| 154506 | tonB dependent receptor family protein-     | 64 | 8 | 11 | 32 | 19 | 37 |
| 666933 | ABC transporter family protein-             | 64 | 8 | 11 | 32 | 19 | 37 |



Suppl Table 11. Centroids found in higher frequency in Sputum-carbapenem resistant isolates

| Centroid IDs | Annotation                                                    | Sput_Resis_A | Sput_Resis_P | % freq | Sput_sens_A | Sput_sens_P | % freq |
|--------------|---------------------------------------------------------------|--------------|--------------|--------|-------------|-------------|--------|
| 805287       | beta-lactamase-                                               | 34           | 21           | 38     | 22          | 0           | 0      |
| 721524       | insA N-terminal domain protein-                               | 32           | 23           | 42     | 21          | 1           | 5      |
| 282882       | conserved hypothetical protein-                               | 31           | 24           | 44     | 21          | 1           | 5      |
| 171653       | putative transposase domain protein-                          | 29           | 26           | 47     | 21          | 1           | 5      |
| 432619       | conserved hypothetical protein-                               | 29           | 26           | 47     | 21          | 1           | 5      |
| 680346       | outer membrane transport family protein-                      | 29           | 26           | 47     | 21          | 1           | 5      |
| 273775       | conserved hypothetical protein-                               | 27           | 28           | 51     | 21          | 1           | 5      |
| 320879       | hicB family protein-                                          | 27           | 28           | 51     | 21          | 1           | 5      |
| 664544       | kiIA-N domain protein-                                        | 27           | 28           | 51     | 21          | 1           | 5      |
| 670368       | conserved hypothetical protein-                               | 27           | 28           | 51     | 21          | 1           | 5      |
| 754233       | conserved hypothetical protein-                               | 27           | 28           | 51     | 21          | 1           | 5      |
| 96668        | arc-like DNA binding domain protein-                          | 27           | 28           | 51     | 21          | 1           | 5      |
| 128341       | putative metal-dependent hydrolase domain protein-            | 26           | 29           | 53     | 21          | 1           | 5      |
| 171651       | putative flavin-binding monooxygenase domain protein-         | 26           | 29           | 53     | 21          | 1           | 5      |
| 747584       | putative membrane protein-                                    | 26           | 29           | 53     | 21          | 1           | 5      |
| 806950       | conserved hypothetical protein-                               | 26           | 29           | 53     | 21          | 1           | 5      |
| 285282       | acetyltransferase family protein-                             | 26           | 29           | 53     | 20          | 2           | 9      |
| 59600        | aminoglycoside-(3)-N-acetyltransferase-                       | 26           | 29           | 53     | 20          | 2           | 9      |
| 60319        | putative nTP-binding protein-                                 | 25           | 30           | 55     | 21          | 1           | 5      |
| 737906       | conserved hypothetical protein-                               | 25           | 30           | 55     | 21          | 1           | 5      |
| 456575       | putative transposase-                                         | 25           | 30           | 55     | 20          | 2           | 9      |
| 462651       | 3-beta hydroxysteroid dehydrogenase/isomerase family protein- | 25           | 30           | 55     | 19          | 3           | 14     |
| 774469       | 3-beta hydroxysteroid dehydrogenase/isomerase family protein- | 25           | 30           | 55     | 19          | 3           | 14     |
| 254490       | conserved hypothetical protein-                               | 24           | 31           | 56     | 21          | 1           | 5      |
| 240030       | phage/plasmid replication , gene II/X family protein-         | 24           | 31           | 56     | 20          | 2           | 9      |
| 253784       | phage/plasmid replication , gene II/X family protein-         | 24           | 31           | 56     | 20          | 2           | 9      |
| 532471       | POTRA domain, ShIB-type family protein-                       | 24           | 31           | 56     | 19          | 3           | 14     |
| 766196       | type I secretion C-terminal target domain protein-            | 24           | 31           | 56     | 19          | 3           | 14     |
| 439424       | filamentous hemagglutinin family N-terminal domain protein-   | 23           | 32           | 58     | 19          | 3           | 14     |
| 557419       | phage/plasmid replication , gene II/X family protein-         | 22           | 33           | 60     | 20          | 2           | 9      |
| 109546       | conserved hypothetical protein-                               | 22           | 33           | 60     | 19          | 3           | 14     |
| 352832       | conserved hypothetical protein-                               | 22           | 33           | 60     | 19          | 3           | 14     |
| 579297       | conserved hypothetical protein-                               | 22           | 33           | 60     | 19          | 3           | 14     |
| 360339       | conserved hypothetical protein-                               | 21           | 34           | 62     | 21          | 1           | 5      |
| 701454       | conserved hypothetical protein-                               | 21           | 34           | 62     | 21          | 1           | 5      |
| 784750       | phage replication CRI family protein-                         | 21           | 34           | 62     | 21          | 1           | 5      |
| 444118       | integron integrase domain protein-                            | 21           | 34           | 62     | 20          | 2           | 9      |
| 81703        | phage/plasmid replication , gene II/X family protein-         | 21           | 34           | 62     | 20          | 2           | 9      |
| 308915       | conserved hypothetical protein-                               | 21           | 34           | 62     | 18          | 4           | 18     |
| 574620       | conserved hypothetical protein-                               | 21           | 34           | 62     | 18          | 4           | 18     |
| 103180       | dnaB-like helicase C terminal domain protein-                 | 20           | 35           | 64     | 21          | 1           | 5      |
| 103181       | conserved hypothetical protein-                               | 20           | 35           | 64     | 21          | 1           | 5      |
| 104331       | terminase small subunit-                                      | 20           | 35           | 64     | 21          | 1           | 5      |
| 104336       | putative gp1.2-                                               | 20           | 35           | 64     | 21          | 1           | 5      |
| 109582       | phage Terminase family protein-                               | 20           | 35           | 64     | 21          | 1           | 5      |
| 109583       | phage portal protein, HK97 family-                            | 20           | 35           | 64     | 21          | 1           | 5      |
| 127370       | conserved hypothetical protein-                               | 20           | 35           | 64     | 21          | 1           | 5      |
| 15761        | conserved hypothetical protein-                               | 20           | 35           | 64     | 21          | 1           | 5      |
| 194843       | conserved hypothetical protein-                               | 20           | 35           | 64     | 21          | 1           | 5      |
| 20940        | conserved hypothetical protein-                               | 20           | 35           | 64     | 21          | 1           | 5      |
| 20948        | transglycosylase SLT domain protein-                          | 20           | 35           | 64     | 21          | 1           | 5      |
| 233840       | conserved hypothetical protein-                               | 20           | 35           | 64     | 21          | 1           | 5      |
| 266613       | conserved hypothetical protein-                               | 20           | 35           | 64     | 21          | 1           | 5      |
| 266614       | conserved hypothetical protein-                               | 20           | 35           | 64     | 21          | 1           | 5      |
| 266615       | phage head-tail joining family protein-                       | 20           | 35           | 64     | 21          | 1           | 5      |
| 276166       | BRO family, N-terminal domain protein-                        | 20           | 35           | 64     | 21          | 1           | 5      |
| 287221       | phage Terminase family protein-                               | 20           | 35           | 64     | 21          | 1           | 5      |
| 287845       | putative membrane protein-                                    | 20           | 35           | 64     | 21          | 1           | 5      |
| 293762       | conserved hypothetical protein-                               | 20           | 35           | 64     | 21          | 1           | 5      |
| 301812       | conserved hypothetical protein-                               | 20           | 35           | 64     | 21          | 1           | 5      |
| 318785       | conserved hypothetical protein-                               | 20           | 35           | 64     | 21          | 1           | 5      |
| 318790       | phage head-tail joining family protein-                       | 20           | 35           | 64     | 21          | 1           | 5      |
| 318800       | conserved hypothetical protein-                               | 20           | 35           | 64     | 21          | 1           | 5      |
| 318806       | conserved hypothetical protein-                               | 20           | 35           | 64     | 21          | 1           | 5      |
| 318814       | conserved hypothetical protein-                               | 20           | 35           | 64     | 21          | 1           | 5      |
| 318821       | conserved hypothetical protein-                               | 20           | 35           | 64     | 21          | 1           | 5      |
| 327491       | conserved hypothetical protein-                               | 20           | 35           | 64     | 21          | 1           | 5      |
| 365761       | conserved hypothetical protein-                               | 20           | 35           | 64     | 21          | 1           | 5      |
| 371029       | terminase small subunit-                                      | 20           | 35           | 64     | 21          | 1           | 5      |
| 371042       | conserved hypothetical protein-                               | 20           | 35           | 64     | 21          | 1           | 5      |
| 37413        | peptidase S24-like family protein-                            | 20           | 35           | 64     | 21          | 1           | 5      |
| 393781       | conserved hypothetical protein-                               | 20           | 35           | 64     | 21          | 1           | 5      |
| 41443        | conserved hypothetical protein-                               | 20           | 35           | 64     | 21          | 1           | 5      |
| 41462        | conserved hypothetical protein-                               | 20           | 35           | 64     | 21          | 1           | 5      |
| 420385       | conserved hypothetical protein-                               | 20           | 35           | 64     | 21          | 1           | 5      |
| 428946       | phage gp6-like head-tail connector family protein-            | 20           | 35           | 64     | 21          | 1           | 5      |
| 428971       | conserved hypothetical protein-                               | 20           | 35           | 64     | 21          | 1           | 5      |
| 431185       | phage X family protein-                                       | 20           | 35           | 64     | 21          | 1           | 5      |
| 433377       | conserved hypothetical protein-                               | 20           | 35           | 64     | 21          | 1           | 5      |
| 439610       | conserved hypothetical protein-                               | 20           | 35           | 64     | 21          | 1           | 5      |
| 445146       | conserved hypothetical protein-                               | 20           | 35           | 64     | 21          | 1           | 5      |
| 575247       | conserved hypothetical protein-                               | 20           | 35           | 64     | 21          | 1           | 5      |
| 576874       | conserved hypothetical protein-                               | 20           | 35           | 64     | 21          | 1           | 5      |

|        |                                                                          |    |    |    |    |   |    |
|--------|--------------------------------------------------------------------------|----|----|----|----|---|----|
| 617676 | helix-turn-helix family protein-                                         | 20 | 35 | 64 | 21 | 1 | 5  |
| 617677 | phage X family protein-                                                  | 20 | 35 | 64 | 21 | 1 | 5  |
| 618690 | phage major capsid protein, HK97 family-                                 | 20 | 35 | 64 | 21 | 1 | 5  |
| 654152 | conserved hypothetical protein-                                          | 20 | 35 | 64 | 21 | 1 | 5  |
| 669584 | conserved hypothetical protein-                                          | 20 | 35 | 64 | 21 | 1 | 5  |
| 680510 | conserved hypothetical protein-                                          | 20 | 35 | 64 | 21 | 1 | 5  |
| 688438 | conserved hypothetical protein-                                          | 20 | 35 | 64 | 21 | 1 | 5  |
| 695155 | conserved hypothetical protein-                                          | 20 | 35 | 64 | 21 | 1 | 5  |
| 695176 | dnaB-like helicase C terminal domain protein-                            | 20 | 35 | 64 | 21 | 1 | 5  |
| 707346 | conserved hypothetical protein-                                          | 20 | 35 | 64 | 21 | 1 | 5  |
| 714878 | conserved hypothetical protein-                                          | 20 | 35 | 64 | 21 | 1 | 5  |
| 714879 | conserved hypothetical protein-                                          | 20 | 35 | 64 | 21 | 1 | 5  |
| 714880 | phage head-tail joining family protein-                                  | 20 | 35 | 64 | 21 | 1 | 5  |
| 714886 | phage Terminase family protein-                                          | 20 | 35 | 64 | 21 | 1 | 5  |
| 721310 | conserved hypothetical protein-                                          | 20 | 35 | 64 | 21 | 1 | 5  |
| 733834 | phage head-tail joining family protein-                                  | 20 | 35 | 64 | 21 | 1 | 5  |
| 733838 | phage prohead protease, HK97 family-                                     | 20 | 35 | 64 | 21 | 1 | 5  |
| 7366   | phage integrase family protein-                                          | 20 | 35 | 64 | 21 | 1 | 5  |
| 745622 | HNH endonuclease family protein-                                         | 20 | 35 | 64 | 21 | 1 | 5  |
| 747562 | conserved hypothetical protein-                                          | 20 | 35 | 64 | 21 | 1 | 5  |
| 747564 | phage head-tail joining family protein-                                  | 20 | 35 | 64 | 21 | 1 | 5  |
| 747571 | terminase small subunit-                                                 | 20 | 35 | 64 | 21 | 1 | 5  |
| 755759 | conserved hypothetical protein-                                          | 20 | 35 | 64 | 21 | 1 | 5  |
| 764514 | conserved hypothetical protein-                                          | 20 | 35 | 64 | 21 | 1 | 5  |
| 783760 | HNH endonuclease family protein-                                         | 20 | 35 | 64 | 21 | 1 | 5  |
| 806724 | conserved hypothetical protein-                                          | 20 | 35 | 64 | 21 | 1 | 5  |
| 806952 | putative gp1.2-                                                          | 20 | 35 | 64 | 21 | 1 | 5  |
| 806955 | conserved hypothetical protein-                                          | 20 | 35 | 64 | 21 | 1 | 5  |
| 806959 | phage portal protein, HK97 family-                                       | 20 | 35 | 64 | 21 | 1 | 5  |
| 806965 | conserved hypothetical protein-                                          | 20 | 35 | 64 | 21 | 1 | 5  |
| 806969 | conserved hypothetical protein-                                          | 20 | 35 | 64 | 21 | 1 | 5  |
| 806971 | transglycosylase SLT domain protein-                                     | 20 | 35 | 64 | 21 | 1 | 5  |
| 95299  | ninB family protein-                                                     | 20 | 35 | 64 | 21 | 1 | 5  |
| 95312  | conserved hypothetical protein-                                          | 20 | 35 | 64 | 21 | 1 | 5  |
| 98825  | conserved hypothetical protein-                                          | 20 | 35 | 64 | 21 | 1 | 5  |
| 98837  | terminase small subunit-                                                 | 20 | 35 | 64 | 21 | 1 | 5  |
| 98839  | conserved hypothetical protein-                                          | 20 | 35 | 64 | 21 | 1 | 5  |
| 99544  | conserved hypothetical protein-                                          | 20 | 35 | 64 | 21 | 1 | 5  |
| 104754 | conserved hypothetical protein-                                          | 20 | 35 | 64 | 20 | 2 | 9  |
| 194838 | conserved hypothetical protein-                                          | 20 | 35 | 64 | 20 | 2 | 9  |
| 327500 | conserved hypothetical protein-                                          | 20 | 35 | 64 | 20 | 2 | 9  |
| 365718 | conserved hypothetical protein-                                          | 20 | 35 | 64 | 20 | 2 | 9  |
| 393533 | conserved hypothetical protein-                                          | 20 | 35 | 64 | 20 | 2 | 9  |
| 412170 | conserved hypothetical protein-                                          | 20 | 35 | 64 | 20 | 2 | 9  |
| 443917 | conserved hypothetical protein-                                          | 20 | 35 | 64 | 20 | 2 | 9  |
| 445187 | phage lysozyme family protein-                                           | 20 | 35 | 64 | 20 | 2 | 9  |
| 474389 | conserved hypothetical protein-                                          | 20 | 35 | 64 | 20 | 2 | 9  |
| 534497 | phage lysozyme family protein-                                           | 20 | 35 | 64 | 20 | 2 | 9  |
| 714863 | putative cell division protein-                                          | 20 | 35 | 64 | 20 | 2 | 9  |
| 714866 | conserved hypothetical protein-                                          | 20 | 35 | 64 | 20 | 2 | 9  |
| 81705  | conserved hypothetical protein-                                          | 20 | 35 | 64 | 20 | 2 | 9  |
| 123658 | putative stress-responsive nuclear envelope domain protein-              | 20 | 35 | 64 | 19 | 3 | 14 |
| 20543  | conserved hypothetical protein-                                          | 20 | 35 | 64 | 19 | 3 | 14 |
| 20715  | conserved hypothetical protein-                                          | 20 | 35 | 64 | 19 | 3 | 14 |
| 270900 | conserved hypothetical protein-                                          | 20 | 35 | 64 | 18 | 4 | 18 |
| 474392 | conserved hypothetical protein-                                          | 20 | 35 | 64 | 18 | 4 | 18 |
| 494445 | lysM domain protein-                                                     | 19 | 36 | 65 | 21 | 1 | 5  |
| 523681 | conserved hypothetical protein-                                          | 19 | 36 | 65 | 21 | 1 | 5  |
| 385580 | conserved hypothetical protein-                                          | 19 | 36 | 65 | 20 | 2 | 9  |
| 432935 | putative transposase-                                                    | 19 | 36 | 65 | 20 | 2 | 9  |
| 464586 | conserved hypothetical protein-                                          | 19 | 36 | 65 | 20 | 2 | 9  |
| 633416 | conserved hypothetical protein-                                          | 19 | 36 | 65 | 20 | 2 | 9  |
| 655568 | C-5 cytosine-specific DNA methylase family protein-                      | 19 | 36 | 65 | 20 | 2 | 9  |
| 676854 | miro-like family protein-                                                | 19 | 36 | 65 | 20 | 2 | 9  |
| 530810 | conserved hypothetical protein-                                          | 19 | 36 | 65 | 19 | 3 | 14 |
| 196024 | conserved hypothetical protein-                                          | 19 | 36 | 65 | 18 | 4 | 18 |
| 256330 | conserved hypothetical protein-                                          | 19 | 36 | 65 | 18 | 4 | 18 |
| 575271 | putative phage-like protein-                                             | 19 | 36 | 65 | 18 | 4 | 18 |
| 330043 | phosphotransferase enzyme family protein-                                | 18 | 37 | 67 | 20 | 2 | 9  |
| 393530 | conserved hypothetical protein-                                          | 18 | 37 | 67 | 20 | 2 | 9  |
| 393531 | helix-turn-helix family protein-                                         | 18 | 37 | 67 | 20 | 2 | 9  |
| 196449 | transposase family protein-                                              | 18 | 37 | 67 | 19 | 3 | 14 |
| 386945 | transposase family protein-                                              | 18 | 37 | 67 | 19 | 3 | 14 |
| 278202 | conserved hypothetical protein-                                          | 18 | 37 | 67 | 18 | 4 | 18 |
| 799674 | conserved hypothetical protein-                                          | 18 | 37 | 67 | 18 | 4 | 18 |
| 143371 | conserved hypothetical protein-                                          | 17 | 38 | 69 | 20 | 2 | 9  |
| 367280 | histidine kinase-, DNA gyrase B-, and HSP90-like ATPase family protein-  | 17 | 38 | 69 | 20 | 2 | 9  |
| 19466  | type I secretion C-terminal target domain protein-                       | 17 | 38 | 69 | 19 | 3 | 14 |
| 494561 | antitoxin of toxin-antitoxin stability system N-terminal family protein- | 17 | 38 | 69 | 19 | 3 | 14 |
| 6553   | #N/A                                                                     | 17 | 38 | 69 | 18 | 4 | 18 |
| 500547 | flagellar system-associated repeat family protein-                       | 16 | 39 | 71 | 18 | 4 | 18 |
| 551079 | transposase C of IS166 homeodomain protein-                              | 16 | 39 | 71 | 18 | 4 | 18 |
| 52047  | type I secretion C-terminal target domain protein-                       | 16 | 39 | 71 | 16 | 6 | 27 |
| 188030 | glycosyl transferases group 1 family protein-                            | 15 | 40 | 73 | 20 | 2 | 9  |
| 634479 | transposase IS66 family protein-                                         | 15 | 40 | 73 | 20 | 2 | 9  |

|        |                                                                           |    |    |    |    |    |    |
|--------|---------------------------------------------------------------------------|----|----|----|----|----|----|
| 90095  | putative transposase-                                                     | 15 | 40 | 73 | 20 | 2  | 9  |
| 676783 | conserved hypothetical protein-                                           | 14 | 41 | 75 | 20 | 2  | 9  |
| 692344 | small Multidrug Resistance family protein-                                | 14 | 41 | 75 | 20 | 2  | 9  |
| 458722 | transposase C of IS166 homeodomain protein-                               | 14 | 41 | 75 | 18 | 4  | 18 |
| 492219 | glycosyltransferase 25 family protein-                                    | 14 | 41 | 75 | 18 | 4  | 18 |
| 223653 | alpha/beta hydrolase fold family protein-                                 | 14 | 41 | 75 | 17 | 5  | 23 |
| 407997 | winged helix DNA-binding domain protein-                                  | 14 | 41 | 75 | 17 | 5  | 23 |
| 408000 | conserved hypothetical protein-                                           | 14 | 41 | 75 | 17 | 5  | 23 |
| 620485 | DJ-1/Pfpl family protein-                                                 | 14 | 41 | 75 | 17 | 5  | 23 |
| 701049 | putative transposase-                                                     | 14 | 41 | 75 | 17 | 5  | 23 |
| 716783 | putative transposase-                                                     | 14 | 41 | 75 | 17 | 5  | 23 |
| 774414 | putative transposase-                                                     | 14 | 41 | 75 | 17 | 5  | 23 |
| 253075 | flagellar system-associated repeat family protein-                        | 14 | 41 | 75 | 16 | 6  | 27 |
| 311042 | conserved hypothetical protein-                                           | 13 | 42 | 76 | 20 | 2  | 9  |
| 739206 | conserved hypothetical protein-                                           | 13 | 42 | 76 | 20 | 2  | 9  |
| 499299 | type I secretion C-terminal target domain protein-                        | 13 | 42 | 76 | 19 | 3  | 14 |
| 447842 | conserved hypothetical protein-                                           | 13 | 42 | 76 | 17 | 5  | 23 |
| 357854 | bacterial SH3 domain protein-                                             | 11 | 44 | 80 | 15 | 7  | 32 |
| 689076 | RHS Repeat family protein-                                                | 11 | 44 | 80 | 15 | 7  | 32 |
| 807883 | bacterial SH3 domain protein-                                             | 11 | 44 | 80 | 15 | 7  | 32 |
| 28391  | integron integrase family protein-                                        | 11 | 44 | 80 | 14 | 8  | 36 |
| 569430 | class 1 integrase domain protein-                                         | 11 | 44 | 80 | 14 | 8  | 36 |
| 393091 | dihydropteroate synthase-                                                 | 10 | 45 | 82 | 20 | 2  | 9  |
| 33850  | conserved hypothetical protein-                                           | 10 | 45 | 82 | 19 | 3  | 14 |
| 393342 | conserved hypothetical protein-                                           | 10 | 45 | 82 | 19 | 3  | 14 |
| 372974 | conserved hypothetical protein-                                           | 10 | 45 | 82 | 17 | 5  | 23 |
| 386745 | bacterial transcriptional regulator family protein-                       | 10 | 45 | 82 | 17 | 5  | 23 |
| 449824 | major Facilitator Superfamily protein-                                    | 10 | 45 | 82 | 17 | 5  | 23 |
| 580816 | putative DcaP-like domain protein-                                        | 10 | 45 | 82 | 17 | 5  | 23 |
| 647825 | demethylmenaquinone methyltransferase family protein-                     | 10 | 45 | 82 | 17 | 5  | 23 |
| 805156 | -isomer specific 2-hydroxyacid dehydrogenase, NAD binding domain protein- | 10 | 45 | 82 | 17 | 5  | 23 |
| 600181 | RHS Repeat family protein-                                                | 10 | 45 | 82 | 15 | 7  | 32 |
| 423279 | rhs element Vgr family protein-                                           | 10 | 45 | 82 | 14 | 8  | 36 |
| 11474  | #N/A                                                                      | 10 | 45 | 82 | 13 | 9  | 41 |
| 121019 | bacterial regulatory, luxR family protein-                                | 10 | 45 | 82 | 13 | 9  | 41 |
| 724570 | tape measure domain protein-                                              | 9  | 46 | 84 | 14 | 8  | 36 |
| 161833 | conserved hypothetical protein-                                           | 9  | 46 | 84 | 13 | 9  | 41 |
| 219486 | mandelamide hydrolase-                                                    | 9  | 46 | 84 | 13 | 9  | 41 |
| 224227 | isochorismatase family protein-                                           | 9  | 46 | 84 | 13 | 9  | 41 |
| 226020 | conserved hypothetical protein-                                           | 9  | 46 | 84 | 13 | 9  | 41 |
| 243670 | proton antiporter-2 family protein-                                       | 9  | 46 | 84 | 13 | 9  | 41 |
| 303845 | lysR substrate binding domain protein-                                    | 9  | 46 | 84 | 13 | 9  | 41 |
| 336688 | sodium/hydrogen exchanger family protein-                                 | 9  | 46 | 84 | 13 | 9  | 41 |
| 456320 | proton antiporter-2 family protein-                                       | 9  | 46 | 84 | 13 | 9  | 41 |
| 496798 | mandelamide hydrolase-                                                    | 9  | 46 | 84 | 13 | 9  | 41 |
| 522766 | amidohydrolase family protein-                                            | 9  | 46 | 84 | 13 | 9  | 41 |
| 572242 | antibiotic biosynthesis monooxygenase family protein-                     | 9  | 46 | 84 | 13 | 9  | 41 |
| 779402 | apolipophorin-III family protein-                                         | 9  | 46 | 84 | 13 | 9  | 41 |
| 805198 | bacterial regulatory, luxR family protein-                                | 9  | 46 | 84 | 13 | 9  | 41 |
| 806150 | putative membrane protein-                                                | 8  | 47 | 85 | 13 | 9  | 41 |
| 28328  | conserved hypothetical protein-                                           | 8  | 47 | 85 | 12 | 10 | 45 |
| 304557 | conserved hypothetical protein-                                           | 8  | 47 | 85 | 12 | 10 | 45 |
| 120545 | HI0933-like family protein-                                               | 7  | 48 | 87 | 13 | 9  | 41 |
| 219455 | saccharopine dehydrogenase family protein-                                | 7  | 48 | 87 | 13 | 9  | 41 |
| 36804  | conserved hypothetical protein-                                           | 7  | 48 | 87 | 13 | 9  | 41 |
| 374387 | FAD dependent oxidoreductase family protein-                              | 7  | 48 | 87 | 13 | 9  | 41 |
| 448535 | conserved hypothetical protein-                                           | 7  | 48 | 87 | 13 | 9  | 41 |
| 570885 | bacterial regulatory, tetR family protein-                                | 7  | 48 | 87 | 13 | 9  | 41 |
| 700856 | HI0933-like family protein-                                               | 7  | 48 | 87 | 13 | 9  | 41 |
| 808251 | hypothetical protein-                                                     | 7  | 48 | 87 | 13 | 9  | 41 |
| 175329 | conserved hypothetical protein-                                           | 7  | 48 | 87 | 12 | 10 | 45 |
| 363161 | putative membrane protein-                                                | 7  | 48 | 87 | 12 | 10 | 45 |
| 409437 | putative membrane protein-                                                | 7  | 48 | 87 | 12 | 10 | 45 |
| 613122 | putative membrane protein-                                                | 7  | 48 | 87 | 12 | 10 | 45 |
| 729735 | conserved hypothetical protein-                                           | 7  | 48 | 87 | 12 | 10 | 45 |
| 413199 | conserved hypothetical protein-                                           | 6  | 49 | 89 | 12 | 10 | 45 |
| 669695 | conserved hypothetical protein-                                           | 5  | 50 | 91 | 19 | 3  | 14 |
| 570697 | fecR family protein-                                                      | 5  | 50 | 91 | 17 | 5  | 23 |
| 308608 | conserved hypothetical protein-                                           | 5  | 50 | 91 | 13 | 9  | 41 |
| 579355 | conserved hypothetical protein-                                           | 5  | 50 | 91 | 13 | 9  | 41 |
| 670819 | conserved hypothetical protein-                                           | 5  | 50 | 91 | 13 | 9  | 41 |
| 751178 | conserved hypothetical protein-                                           | 5  | 50 | 91 | 13 | 9  | 41 |
| 191314 | cro/C1-type HTH DNA-binding domain protein-                               | 5  | 50 | 91 | 12 | 10 | 45 |
| 589537 | conserved hypothetical protein-                                           | 5  | 50 | 91 | 12 | 10 | 45 |
| 435934 | putative gp77-                                                            | 5  | 50 | 91 | 10 | 12 | 55 |
| 55652  | conserved hypothetical protein-                                           | 5  | 50 | 91 | 10 | 12 | 55 |
| 37288  | conserved hypothetical protein-                                           | 4  | 51 | 93 | 18 | 4  | 18 |
| 292400 | heme oxygenase family protein-                                            | 4  | 51 | 93 | 17 | 5  | 23 |
| 370880 | conserved hypothetical protein-                                           | 4  | 51 | 93 | 17 | 5  | 23 |
| 431013 | conserved hypothetical protein-                                           | 4  | 51 | 93 | 17 | 5  | 23 |
| 451113 | tonB family C-terminal domain protein-                                    | 4  | 51 | 93 | 17 | 5  | 23 |
| 506784 | RNA polymerase sigma factor, sigma-70 family protein-                     | 4  | 51 | 93 | 17 | 5  | 23 |
| 592033 | secretin and TonB N terminus short domain protein-                        | 4  | 51 | 93 | 17 | 5  | 23 |
| 375450 | conserved hypothetical protein-                                           | 4  | 51 | 93 | 12 | 10 | 45 |
| 473530 | conserved hypothetical protein-                                           | 4  | 51 | 93 | 12 | 10 | 45 |

|        |                                                                           |   |    |     |    |    |    |
|--------|---------------------------------------------------------------------------|---|----|-----|----|----|----|
| 726703 | conserved hypothetical protein-                                           | 4 | 51 | 93  | 12 | 10 | 45 |
| 727942 | conserved hypothetical protein-                                           | 4 | 51 | 93  | 12 | 10 | 45 |
| 715886 | conserved hypothetical protein-                                           | 4 | 51 | 93  | 11 | 11 | 50 |
| 732223 | conserved hypothetical protein-                                           | 4 | 51 | 93  | 11 | 11 | 50 |
| 139242 | conserved hypothetical protein-                                           | 4 | 51 | 93  | 10 | 12 | 55 |
| 222007 | aminotransferase, class I/II domain protein-                              | 4 | 51 | 93  | 10 | 12 | 55 |
| 415840 | rhs element Vgr family protein-                                           | 3 | 52 | 95  | 10 | 12 | 55 |
| 696546 | rhs element Vgr family protein-                                           | 3 | 52 | 95  | 10 | 12 | 55 |
| 467037 | 3-beta hydroxysteroid dehydrogenase/isomerase family protein-             | 3 | 52 | 95  | 9  | 13 | 59 |
| 565121 | nucleoside-diphosphate-sugar epimerase domain protein-                    | 3 | 52 | 95  | 9  | 13 | 59 |
| 629765 | conserved hypothetical protein-                                           | 3 | 52 | 95  | 9  | 13 | 59 |
| 667656 | rhs element Vgr family protein-                                           | 3 | 52 | 95  | 9  | 13 | 59 |
| 99100  | type I secretion C-terminal target domain protein-                        | 2 | 53 | 96  | 9  | 13 | 59 |
| 275388 | xanthine dehydrogenase, molybdopterin binding subunit-                    | 2 | 53 | 96  | 8  | 14 | 64 |
| 607397 | putative filE-                                                            | 2 | 53 | 96  | 8  | 14 | 64 |
| 805161 | efflux transporter, RND family, MFP subunit-                              | 2 | 53 | 96  | 8  | 14 | 64 |
| 136137 | putative membrane protein-                                                | 1 | 54 | 98  | 12 | 10 | 45 |
| 545732 | conserved hypothetical protein-                                           | 1 | 54 | 98  | 12 | 10 | 45 |
| 190197 | ABC transporter, substrate-binding , aliphatic sulfonates family protein- | 1 | 54 | 98  | 11 | 11 | 50 |
| 658764 | -protein-dependent transport system inner membrane component family p     | 1 | 54 | 98  | 11 | 11 | 50 |
| 122216 | transcriptional regulator, TetR family domain protein-                    | 1 | 54 | 98  | 10 | 12 | 55 |
| 667923 | conserved hypothetical protein-                                           | 1 | 54 | 98  | 10 | 12 | 55 |
| 6823   | #N/A                                                                      | 1 | 54 | 98  | 10 | 12 | 55 |
| 452088 | putative filE-                                                            | 1 | 54 | 98  | 9  | 13 | 59 |
| 805166 | dehydratase family protein-                                               | 1 | 54 | 98  | 9  | 13 | 59 |
| 278501 | type I secretion C-terminal target domain protein-                        | 1 | 54 | 98  | 8  | 14 | 64 |
| 293922 | NADP oxidoreductase coenzyme F420-dependent family protein-               | 1 | 54 | 98  | 8  | 14 | 64 |
| 321086 | acetyltransferase domain protein-                                         | 1 | 54 | 98  | 8  | 14 | 64 |
| 336369 | putative membrane protein-                                                | 1 | 54 | 98  | 8  | 14 | 64 |
| 36766  | acetyltransferase domain protein-                                         | 1 | 54 | 98  | 8  | 14 | 64 |
| 508439 | acetyltransferase domain protein-                                         | 1 | 54 | 98  | 8  | 14 | 64 |
| 561500 | sugar (and other) transporter family protein-                             | 1 | 54 | 98  | 8  | 14 | 64 |
| 575574 | lysR substrate binding domain protein-                                    | 1 | 54 | 98  | 8  | 14 | 64 |
| 580406 | bacterial regulatory, tetR family protein-                                | 1 | 54 | 98  | 8  | 14 | 64 |
| 668779 | major Facilitator Superfamily protein-                                    | 1 | 54 | 98  | 8  | 14 | 64 |
| 749853 | conserved hypothetical protein-                                           | 1 | 54 | 98  | 8  | 14 | 64 |
| 805167 | fumarylacetoacetate (FAA) hydrolase family protein-                       | 1 | 54 | 98  | 8  | 14 | 64 |
| 136990 | conserved hypothetical protein-                                           | 1 | 54 | 98  | 7  | 15 | 68 |
| 202133 | conserved hypothetical protein-                                           | 1 | 54 | 98  | 7  | 15 | 68 |
| 222725 | conserved hypothetical protein-                                           | 1 | 54 | 98  | 7  | 15 | 68 |
| 256202 | bacterial group 3 Ig-like domain protein-                                 | 1 | 54 | 98  | 7  | 15 | 68 |
| 434048 | conserved hypothetical protein-                                           | 1 | 54 | 98  | 7  | 15 | 68 |
| 477594 | conserved hypothetical protein-                                           | 1 | 54 | 98  | 7  | 15 | 68 |
| 562995 | conserved hypothetical protein-                                           | 1 | 54 | 98  | 7  | 15 | 68 |
| 633424 | phage integrase family protein-                                           | 1 | 54 | 98  | 7  | 15 | 68 |
| 40390  | type I secretion C-terminal target domain protein-                        | 0 | 55 | 100 | 11 | 11 | 50 |
| 49565  | conserved hypothetical protein-                                           | 0 | 55 | 100 | 10 | 12 | 55 |
| 546737 | conserved hypothetical protein-                                           | 0 | 55 | 100 | 10 | 12 | 55 |
| 552193 | putative pilus subunit FilA-                                              | 0 | 55 | 100 | 10 | 12 | 55 |
| 629143 | conserved hypothetical protein-                                           | 0 | 55 | 100 | 10 | 12 | 55 |
| 390271 | bacterial Ig-like domain family protein-                                  | 0 | 55 | 100 | 9  | 13 | 59 |
| 466998 | NADP oxidoreductase coenzyme F420-dependent family protein-               | 0 | 55 | 100 | 9  | 13 | 59 |
| 659432 | malonate transporter, MadL subunit-                                       | 0 | 55 | 100 | 9  | 13 | 59 |
| 711922 | malonate transporter, MadM subunit-                                       | 0 | 55 | 100 | 9  | 13 | 59 |
| 791818 | flagellar system-associated repeat family protein-                        | 0 | 55 | 100 | 9  | 13 | 59 |
| 217537 | cell wall-associated protease domain protein-                             | 0 | 55 | 100 | 8  | 14 | 64 |
| 254584 | transposase IS66 family protein-                                          | 0 | 55 | 100 | 8  | 14 | 64 |
| 389568 | bacterial Ig-like domain family protein-                                  | 0 | 55 | 100 | 8  | 14 | 64 |
| 503330 | ketopantoate reductase PanE/ApbA family protein-                          | 0 | 55 | 100 | 8  | 14 | 64 |
| 551083 | flagellar system-associated repeat family protein-                        | 0 | 55 | 100 | 8  | 14 | 64 |
| 565124 | ketopantoate reductase PanE/ApbA family protein-                          | 0 | 55 | 100 | 8  | 14 | 64 |
| 581747 | transposase domain protein-                                               | 0 | 55 | 100 | 8  | 14 | 64 |
| 607393 | putative pilus subunit FilA-                                              | 0 | 55 | 100 | 8  | 14 | 64 |
| 758275 | transposase IS66 family protein-                                          | 0 | 55 | 100 | 8  | 14 | 64 |
| 781623 | transposase IS66 family protein-                                          | 0 | 55 | 100 | 8  | 14 | 64 |
| 800888 | transposase IS66 family protein-                                          | 0 | 55 | 100 | 8  | 14 | 64 |
| 102438 | flagellar system-associated repeat family protein-                        | 0 | 55 | 100 | 7  | 15 | 68 |
| 389976 | conserved hypothetical protein-                                           | 0 | 55 | 100 | 7  | 15 | 68 |
| 808261 | conserved hypothetical protein-                                           | 0 | 55 | 100 | 7  | 15 | 68 |
| 138000 | conserved hypothetical protein-                                           | 0 | 55 | 100 | 6  | 16 | 73 |
| 224897 | flagellar system-associated repeat family protein-                        | 0 | 55 | 100 | 6  | 16 | 73 |
| 396612 | conserved hypothetical protein-                                           | 0 | 55 | 100 | 6  | 16 | 73 |
| 628364 | flagellar system-associated repeat family protein-                        | 0 | 55 | 100 | 6  | 16 | 73 |
| 629764 | conserved hypothetical protein-                                           | 0 | 55 | 100 | 6  | 16 | 73 |

Suppl Table 12. Centroids found in higher frequency in Sputum-carbapenem sensitive isolates

| Centroid IDs | Annotation                                                          | Sput_Resis_A | Sput_Resis_P | % freq | Sput_sens_A | Sput_sens_P | % freq |
|--------------|---------------------------------------------------------------------|--------------|--------------|--------|-------------|-------------|--------|
| 142502       | conserved hypothetical protein-                                     | 55           | 0            | 0      | 16          | 6           | 27     |
| 211175       | hypothetical protein-                                               | 55           | 0            | 0      | 16          | 6           | 27     |
| 250282       | conserved hypothetical protein-                                     | 55           | 0            | 0      | 16          | 6           | 27     |
| 313469       | PAAR motif family protein-                                          | 55           | 0            | 0      | 16          | 6           | 27     |
| 3418         | #N/A                                                                | 55           | 0            | 0      | 16          | 6           | 27     |
| 440778       | conserved hypothetical protein-                                     | 55           | 0            | 0      | 16          | 6           | 27     |
| 474942       | conserved hypothetical protein-                                     | 55           | 0            | 0      | 16          | 6           | 27     |
| 480535       | HNH endonuclease family protein-                                    | 55           | 0            | 0      | 16          | 6           | 27     |
| 483049       | helix-turn-helix domain protein-                                    | 55           | 0            | 0      | 16          | 6           | 27     |
| 483050       | alpha/beta hydrolase fold family protein-                           | 55           | 0            | 0      | 16          | 6           | 27     |
| 543324       | PAAR motif family protein-                                          | 55           | 0            | 0      | 16          | 6           | 27     |
| 675874       | conserved hypothetical protein-                                     | 55           | 0            | 0      | 16          | 6           | 27     |
| 675913       | hypothetical protein-                                               | 55           | 0            | 0      | 16          | 6           | 27     |
| 780118       | hypothetical protein-                                               | 55           | 0            | 0      | 16          | 6           | 27     |
| 166585       | tetratricopeptide repeat family protein-                            | 55           | 0            | 0      | 15          | 7           | 32     |
| 240783       | rhs element Vgr family protein-                                     | 55           | 0            | 0      | 15          | 7           | 32     |
| 251003       | conserved hypothetical protein-                                     | 55           | 0            | 0      | 15          | 7           | 32     |
| 251327       | helix-turn-helix domain protein-                                    | 55           | 0            | 0      | 15          | 7           | 32     |
| 47489        | malonate transporter, MadL subunit-                                 | 55           | 0            | 0      | 15          | 7           | 32     |
| 543183       | sel1 repeat family protein-                                         | 55           | 0            | 0      | 15          | 7           | 32     |
| 597260       | type VI secretion system Rhs element Vgr family protein-            | 55           | 0            | 0      | 15          | 7           | 32     |
| 732221       | conserved hypothetical protein-                                     | 55           | 0            | 0      | 15          | 7           | 32     |
| 781747       | conserved hypothetical protein-                                     | 55           | 0            | 0      | 15          | 7           | 32     |
| 645920       | helix-turn-helix family protein-                                    | 55           | 0            | 0      | 14          | 8           | 36     |
| 139033       | conserved hypothetical protein-                                     | 55           | 0            | 0      | 13          | 9           | 41     |
| 2134         | #N/A                                                                | 55           | 0            | 0      | 13          | 9           | 41     |
| 473661       | rhs element Vgr family protein-                                     | 55           | 0            | 0      | 13          | 9           | 41     |
| 528223       | conserved hypothetical protein-                                     | 55           | 0            | 0      | 13          | 9           | 41     |
| 589033       | rhs element Vgr family domain protein-                              | 55           | 0            | 0      | 13          | 9           | 41     |
| 644560       | malonate transporter, MadM subunit-                                 | 55           | 0            | 0      | 13          | 9           | 41     |
| 481603       | conserved hypothetical protein-                                     | 55           | 0            | 0      | 11          | 11          | 50     |
| 156105       | doxX family protein-                                                | 54           | 1            | 2      | 15          | 7           | 32     |
| 198594       | peptidase S24-like family protein-                                  | 54           | 1            | 2      | 15          | 7           | 32     |
| 250478       | peptidase S24-like family protein-                                  | 54           | 1            | 2      | 15          | 7           | 32     |
| 263194       | peptidase S24-like family protein-                                  | 54           | 1            | 2      | 15          | 7           | 32     |
| 308576       | peptidase S24-like family protein-                                  | 54           | 1            | 2      | 15          | 7           | 32     |
| 346343       | POTRA domain, ShlB-type family protein-                             | 54           | 1            | 2      | 15          | 7           | 32     |
| 35213        | bacterial regulatory, tetR family protein-                          | 54           | 1            | 2      | 15          | 7           | 32     |
| 354276       | peptidase S24-like family protein-                                  | 54           | 1            | 2      | 15          | 7           | 32     |
| 3767         | #N/A                                                                | 54           | 1            | 2      | 15          | 7           | 32     |
| 400060       | POTRA domain, ShlB-type family protein-                             | 54           | 1            | 2      | 15          | 7           | 32     |
| 528030       | peptidase S24-like family protein-                                  | 54           | 1            | 2      | 15          | 7           | 32     |
| 714592       | peptidase S24-like family protein-                                  | 54           | 1            | 2      | 15          | 7           | 32     |
| 725153       | peptidase S24-like family protein-                                  | 54           | 1            | 2      | 15          | 7           | 32     |
| 730452       | peptidase S24-like family protein-                                  | 54           | 1            | 2      | 15          | 7           | 32     |
| 787868       | hypothetical protein-                                               | 54           | 1            | 2      | 15          | 7           | 32     |
| 86252        | POTRA domain, ShlB-type family protein-                             | 54           | 1            | 2      | 15          | 7           | 32     |
| 113436       | conserved hypothetical protein-                                     | 54           | 1            | 2      | 14          | 8           | 36     |
| 113494       | conserved hypothetical protein-                                     | 54           | 1            | 2      | 14          | 8           | 36     |
| 124469       | conserved hypothetical protein-                                     | 54           | 1            | 2      | 14          | 8           | 36     |
| 125056       | putative dNA polymerase III, epsilon subunit-                       | 54           | 1            | 2      | 14          | 8           | 36     |
| 125061       | bacterial regulatory , Fis family protein-                          | 54           | 1            | 2      | 14          | 8           | 36     |
| 186178       | putative carbapenem-associated resistance protein-                  | 54           | 1            | 2      | 14          | 8           | 36     |
| 213349       | conserved hypothetical protein-                                     | 54           | 1            | 2      | 14          | 8           | 36     |
| 213357       | peptidase S24-like family protein-                                  | 54           | 1            | 2      | 14          | 8           | 36     |
| 213360       | conserved hypothetical protein-                                     | 54           | 1            | 2      | 14          | 8           | 36     |
| 213362       | bacteriophage replication O family protein-                         | 54           | 1            | 2      | 14          | 8           | 36     |
| 213370       | conserved hypothetical protein-                                     | 54           | 1            | 2      | 14          | 8           | 36     |
| 213374       | conserved hypothetical protein-                                     | 54           | 1            | 2      | 14          | 8           | 36     |
| 217805       | conserved hypothetical protein-                                     | 54           | 1            | 2      | 14          | 8           | 36     |
| 237518       | conserved hypothetical protein-                                     | 54           | 1            | 2      | 14          | 8           | 36     |
| 256334       | conserved hypothetical protein-                                     | 54           | 1            | 2      | 14          | 8           | 36     |
| 256338       | D12 class N6 adenine-specific DNA methyltransferase family protein- | 54           | 1            | 2      | 14          | 8           | 36     |
| 329871       | conserved hypothetical protein-                                     | 54           | 1            | 2      | 14          | 8           | 36     |
| 329892       | conserved hypothetical protein-                                     | 54           | 1            | 2      | 14          | 8           | 36     |
| 330952       | conserved hypothetical protein-                                     | 54           | 1            | 2      | 14          | 8           | 36     |
| 330956       | conserved hypothetical protein-                                     | 54           | 1            | 2      | 14          | 8           | 36     |
| 334765       | phosphoadenosine phosphosulfate reductase family protein-           | 54           | 1            | 2      | 14          | 8           | 36     |
| 337438       | transglycosylase SLT domain protein-                                | 54           | 1            | 2      | 14          | 8           | 36     |
| 340732       | phage family protein-                                               | 54           | 1            | 2      | 14          | 8           | 36     |
| 341387       | conserved hypothetical protein-                                     | 54           | 1            | 2      | 14          | 8           | 36     |
| 341408       | conserved hypothetical protein-                                     | 54           | 1            | 2      | 14          | 8           | 36     |
| 350612       | phosphoadenosine phosphosulfate reductase family protein-           | 54           | 1            | 2      | 14          | 8           | 36     |
| 383321       | hypothetical protein-                                               | 54           | 1            | 2      | 14          | 8           | 36     |
| 418489       | NUDIX domain protein-                                               | 54           | 1            | 2      | 14          | 8           | 36     |
| 418772       | conserved hypothetical protein-                                     | 54           | 1            | 2      | 14          | 8           | 36     |
| 425458       | phosphoadenosine phosphosulfate reductase family protein-           | 54           | 1            | 2      | 14          | 8           | 36     |
| 425464       | hypothetical protein-                                               | 54           | 1            | 2      | 14          | 8           | 36     |
| 513470       | putative predicted protein-                                         | 54           | 1            | 2      | 14          | 8           | 36     |
| 513508       | conserved hypothetical protein-                                     | 54           | 1            | 2      | 14          | 8           | 36     |
| 514002       | conserved hypothetical protein-                                     | 54           | 1            | 2      | 14          | 8           | 36     |
| 514039       | hypothetical protein-                                               | 54           | 1            | 2      | 14          | 8           | 36     |
| 514043       | hypothetical protein-                                               | 54           | 1            | 2      | 14          | 8           | 36     |
| 521831       | conserved hypothetical protein-                                     | 54           | 1            | 2      | 14          | 8           | 36     |
| 521845       | hypothetical protein-                                               | 54           | 1            | 2      | 14          | 8           | 36     |
| 521870       | tape measure domain protein-                                        | 54           | 1            | 2      | 14          | 8           | 36     |
| 521883       | hypothetical protein-                                               | 54           | 1            | 2      | 14          | 8           | 36     |
| 64080        | major Facilitator Superfamily protein-                              | 54           | 1            | 2      | 14          | 8           | 36     |
| 661427       | phage lysozyme family protein-                                      | 54           | 1            | 2      | 14          | 8           | 36     |

|        |                                                             |    |   |   |    |    |    |
|--------|-------------------------------------------------------------|----|---|---|----|----|----|
| 661434 | conserved hypothetical protein                              | 54 | 1 | 2 | 14 | 8  | 36 |
| 661443 | conserved hypothetical protein                              | 54 | 1 | 2 | 14 | 8  | 36 |
| 674590 | transglycosylase SLT domain protein                         | 54 | 1 | 2 | 14 | 8  | 36 |
| 675523 | pyocin activator PrtN family protein                        | 54 | 1 | 2 | 14 | 8  | 36 |
| 675528 | conserved hypothetical protein                              | 54 | 1 | 2 | 14 | 8  | 36 |
| 675576 | conserved hypothetical protein                              | 54 | 1 | 2 | 14 | 8  | 36 |
| 710187 | ERF superfamily protein                                     | 54 | 1 | 2 | 14 | 8  | 36 |
| 710248 | phage integrase family protein                              | 54 | 1 | 2 | 14 | 8  | 36 |
| 711865 | conserved hypothetical protein                              | 54 | 1 | 2 | 14 | 8  | 36 |
| 711869 | conserved hypothetical protein                              | 54 | 1 | 2 | 14 | 8  | 36 |
| 711870 | conserved hypothetical protein                              | 54 | 1 | 2 | 14 | 8  | 36 |
| 711889 | conserved hypothetical protein                              | 54 | 1 | 2 | 14 | 8  | 36 |
| 718372 | putative carbapenem-associated resistance protein           | 54 | 1 | 2 | 14 | 8  | 36 |
| 789361 | conserved hypothetical protein                              | 54 | 1 | 2 | 14 | 8  | 36 |
| 791474 | conserved hypothetical protein                              | 54 | 1 | 2 | 14 | 8  | 36 |
| 114146 | conserved hypothetical protein                              | 54 | 1 | 2 | 13 | 9  | 41 |
| 114162 | conserved hypothetical protein                              | 54 | 1 | 2 | 13 | 9  | 41 |
| 114171 | 3'-5' exonuclease family protein                            | 54 | 1 | 2 | 13 | 9  | 41 |
| 114175 | DEAD/DEAH box helicase family protein                       | 54 | 1 | 2 | 13 | 9  | 41 |
| 124448 | bacteriophage head to tail connecting family protein        | 54 | 1 | 2 | 13 | 9  | 41 |
| 166959 | conserved hypothetical protein                              | 54 | 1 | 2 | 13 | 9  | 41 |
| 166966 | conserved hypothetical protein                              | 54 | 1 | 2 | 13 | 9  | 41 |
| 166971 | conserved hypothetical protein                              | 54 | 1 | 2 | 13 | 9  | 41 |
| 166981 | bacteriophage head to tail connecting family protein        | 54 | 1 | 2 | 13 | 9  | 41 |
| 166983 | conserved hypothetical protein                              | 54 | 1 | 2 | 13 | 9  | 41 |
| 166988 | putative bbp13-                                             | 54 | 1 | 2 | 13 | 9  | 41 |
| 166996 | putative membrane protein                                   | 54 | 1 | 2 | 13 | 9  | 41 |
| 217820 | terminase small subunit                                     | 54 | 1 | 2 | 13 | 9  | 41 |
| 217837 | acetyltransferase family protein                            | 54 | 1 | 2 | 13 | 9  | 41 |
| 330951 | conserved hypothetical protein                              | 54 | 1 | 2 | 13 | 9  | 41 |
| 336600 | conserved hypothetical protein                              | 54 | 1 | 2 | 13 | 9  | 41 |
| 348994 | PD-(D/E)XK nuclease superfamily protein                     | 54 | 1 | 2 | 13 | 9  | 41 |
| 349567 | conserved hypothetical protein                              | 54 | 1 | 2 | 13 | 9  | 41 |
| 380884 | conserved hypothetical protein                              | 54 | 1 | 2 | 13 | 9  | 41 |
| 409869 | bacterial regulatory, tetR family protein                   | 54 | 1 | 2 | 13 | 9  | 41 |
| 411759 | VRR-NUC domain protein                                      | 54 | 1 | 2 | 13 | 9  | 41 |
| 426044 | conserved hypothetical protein                              | 54 | 1 | 2 | 13 | 9  | 41 |
| 426057 | helix-turn-helix family protein                             | 54 | 1 | 2 | 13 | 9  | 41 |
| 426061 | conserved hypothetical protein                              | 54 | 1 | 2 | 13 | 9  | 41 |
| 426063 | conserved hypothetical protein                              | 54 | 1 | 2 | 13 | 9  | 41 |
| 426069 | conserved hypothetical protein                              | 54 | 1 | 2 | 13 | 9  | 41 |
| 513486 | terminase-like family protein                               | 54 | 1 | 2 | 13 | 9  | 41 |
| 514040 | hypothetical protein                                        | 54 | 1 | 2 | 13 | 9  | 41 |
| 521869 | conserved hypothetical protein                              | 54 | 1 | 2 | 13 | 9  | 41 |
| 522219 | helix-turn-helix domain protein                             | 54 | 1 | 2 | 13 | 9  | 41 |
| 584714 | hypothetical protein                                        | 54 | 1 | 2 | 13 | 9  | 41 |
| 644840 | conserved hypothetical protein                              | 54 | 1 | 2 | 13 | 9  | 41 |
| 674593 | putative bbp13-                                             | 54 | 1 | 2 | 13 | 9  | 41 |
| 674606 | putative predicted protein                                  | 54 | 1 | 2 | 13 | 9  | 41 |
| 674607 | phage/plasmid primase, P4 family, C-terminal domain protein | 54 | 1 | 2 | 13 | 9  | 41 |
| 709398 | putative membrane protein                                   | 54 | 1 | 2 | 13 | 9  | 41 |
| 711861 | conserved hypothetical protein                              | 54 | 1 | 2 | 13 | 9  | 41 |
| 711880 | conserved hypothetical protein                              | 54 | 1 | 2 | 13 | 9  | 41 |
| 789355 | RNase_H superfamily protein                                 | 54 | 1 | 2 | 13 | 9  | 41 |
| 789370 | terminase-like family protein                               | 54 | 1 | 2 | 13 | 9  | 41 |
| 789373 | conserved hypothetical protein                              | 54 | 1 | 2 | 13 | 9  | 41 |
| 789374 | conserved hypothetical protein                              | 54 | 1 | 2 | 13 | 9  | 41 |
| 199881 | conserved hypothetical protein                              | 54 | 1 | 2 | 12 | 10 | 45 |
| 199882 | conserved hypothetical protein                              | 54 | 1 | 2 | 12 | 10 | 45 |
| 213392 | conserved hypothetical protein                              | 54 | 1 | 2 | 12 | 10 | 45 |
| 418755 | phage minor tail family protein                             | 54 | 1 | 2 | 12 | 10 | 45 |
| 469019 | conserved hypothetical protein                              | 54 | 1 | 2 | 12 | 10 | 45 |
| 475202 | phage minor tail family protein                             | 54 | 1 | 2 | 12 | 10 | 45 |
| 475586 | phage minor tail family protein                             | 54 | 1 | 2 | 12 | 10 | 45 |
| 475595 | conserved hypothetical protein                              | 54 | 1 | 2 | 12 | 10 | 45 |
| 521865 | conserved hypothetical protein                              | 54 | 1 | 2 | 12 | 10 | 45 |
| 644836 | phage minor tail family protein                             | 54 | 1 | 2 | 12 | 10 | 45 |
| 710227 | conserved hypothetical protein                              | 54 | 1 | 2 | 12 | 10 | 45 |
| 791457 | phage minor tail family protein                             | 54 | 1 | 2 | 12 | 10 | 45 |
| 791471 | conserved hypothetical protein                              | 54 | 1 | 2 | 12 | 10 | 45 |
| 800170 | conserved hypothetical protein                              | 54 | 1 | 2 | 12 | 10 | 45 |
| 183295 | conserved hypothetical protein                              | 54 | 1 | 2 | 11 | 11 | 50 |
| 336601 | phage integrase family protein                              | 54 | 1 | 2 | 11 | 11 | 50 |
| 675532 | conserved hypothetical protein                              | 54 | 1 | 2 | 11 | 11 | 50 |
| 278597 | conserved hypothetical protein                              | 54 | 1 | 2 | 10 | 12 | 55 |
| 344469 | putative glutamate 5-kinase                                 | 54 | 1 | 2 | 8  | 14 | 64 |
| 110695 | conserved hypothetical protein                              | 53 | 2 | 4 | 14 | 8  | 36 |
| 110698 | putative bacteriophage protein                              | 53 | 2 | 4 | 14 | 8  | 36 |
| 110701 | putative bacteriophage protein                              | 53 | 2 | 4 | 14 | 8  | 36 |
| 110711 | putative phage terminase, large subunit                     | 53 | 2 | 4 | 14 | 8  | 36 |
| 111449 | putative predicted protein                                  | 53 | 2 | 4 | 14 | 8  | 36 |
| 114127 | core-2/l-Branching enzyme family protein                    | 53 | 2 | 4 | 14 | 8  | 36 |
| 114130 | polysaccharide biosynthesis family protein                  | 53 | 2 | 4 | 14 | 8  | 36 |
| 210082 | phage head morphogenesis, SPP1 gp7 family domain protein    | 53 | 2 | 4 | 14 | 8  | 36 |
| 210084 | putative bacteriophage protein                              | 53 | 2 | 4 | 14 | 8  | 36 |
| 210088 | putative bacteriophage protein                              | 53 | 2 | 4 | 14 | 8  | 36 |
| 210094 | putative bacteriophage protein                              | 53 | 2 | 4 | 14 | 8  | 36 |
| 210095 | conserved hypothetical protein                              | 53 | 2 | 4 | 14 | 8  | 36 |
| 211335 | core-2/l-Branching enzyme family protein                    | 53 | 2 | 4 | 14 | 8  | 36 |
| 221594 | conserved hypothetical protein                              | 53 | 2 | 4 | 14 | 8  | 36 |
| 221602 | putative translation initiation factor IF-2-                | 53 | 2 | 4 | 14 | 8  | 36 |

|        |                                                                                  |    |   |    |    |    |    |
|--------|----------------------------------------------------------------------------------|----|---|----|----|----|----|
| 237393 | capsule polysaccharide biosynthesis family protein-                              | 53 | 2 | 4  | 14 | 8  | 36 |
| 320393 | putative predicted protein-                                                      | 53 | 2 | 4  | 14 | 8  | 36 |
| 332109 | conserved hypothetical protein-                                                  | 53 | 2 | 4  | 14 | 8  | 36 |
| 334727 | conserved hypothetical protein-                                                  | 53 | 2 | 4  | 14 | 8  | 36 |
| 334728 | putative bacteriophage protein-                                                  | 53 | 2 | 4  | 14 | 8  | 36 |
| 334736 | phage head morphogenesis , SPP1 gp7 family domain protein-                       | 53 | 2 | 4  | 14 | 8  | 36 |
| 344683 | putative membrane protein-                                                       | 53 | 2 | 4  | 14 | 8  | 36 |
| 345770 | putative membrane protein-                                                       | 53 | 2 | 4  | 14 | 8  | 36 |
| 348147 | conserved hypothetical protein-                                                  | 53 | 2 | 4  | 14 | 8  | 36 |
| 351105 | glycosyl transferase 1 family protein-                                           | 53 | 2 | 4  | 14 | 8  | 36 |
| 384130 | putative predicted protein-                                                      | 53 | 2 | 4  | 14 | 8  | 36 |
| 408866 | putative bacteriophage protein-                                                  | 53 | 2 | 4  | 14 | 8  | 36 |
| 409899 | acetyltransferase domain protein-                                                | 53 | 2 | 4  | 14 | 8  | 36 |
| 424203 | conserved hypothetical protein-                                                  | 53 | 2 | 4  | 14 | 8  | 36 |
| 486236 | conserved hypothetical protein-                                                  | 53 | 2 | 4  | 14 | 8  | 36 |
| 486253 | conserved hypothetical protein-                                                  | 53 | 2 | 4  | 14 | 8  | 36 |
| 513563 | peptidase S24-like family protein-                                               | 53 | 2 | 4  | 14 | 8  | 36 |
| 518939 | putative bacteriophage protein-                                                  | 53 | 2 | 4  | 14 | 8  | 36 |
| 518944 | conserved hypothetical protein-                                                  | 53 | 2 | 4  | 14 | 8  | 36 |
| 63956  | conserved hypothetical protein-                                                  | 53 | 2 | 4  | 14 | 8  | 36 |
| 63961  | putative bacteriophage protein-                                                  | 53 | 2 | 4  | 14 | 8  | 36 |
| 63964  | putative bacteriophage protein-                                                  | 53 | 2 | 4  | 14 | 8  | 36 |
| 63971  | conserved hypothetical protein-                                                  | 53 | 2 | 4  | 14 | 8  | 36 |
| 63975  | conserved hypothetical protein-                                                  | 53 | 2 | 4  | 14 | 8  | 36 |
| 64107  | putative membrane protein-                                                       | 53 | 2 | 4  | 14 | 8  | 36 |
| 664003 | conserved hypothetical protein-                                                  | 53 | 2 | 4  | 14 | 8  | 36 |
| 709050 | baseplate J-like family protein-                                                 | 53 | 2 | 4  | 14 | 8  | 36 |
| 711406 | putative bacteriophage protein-                                                  | 53 | 2 | 4  | 14 | 8  | 36 |
| 163646 | conserved hypothetical protein-                                                  | 53 | 2 | 4  | 13 | 9  | 41 |
| 674280 | transposase family protein-                                                      | 53 | 2 | 4  | 13 | 9  | 41 |
| 711414 | putative bacteriophage protein-                                                  | 53 | 2 | 4  | 13 | 9  | 41 |
| 14627  | #N/A                                                                             | 53 | 2 | 4  | 12 | 10 | 45 |
| 255320 | glycosyl transferase 2 family protein-                                           | 53 | 2 | 4  | 12 | 10 | 45 |
| 336354 | conserved hypothetical protein-                                                  | 53 | 2 | 4  | 12 | 10 | 45 |
| 660374 | conserved hypothetical protein-                                                  | 53 | 2 | 4  | 12 | 10 | 45 |
| 660375 | conserved hypothetical protein-                                                  | 53 | 2 | 4  | 12 | 10 | 45 |
| 698793 | glycosyl transferase 2 family protein-                                           | 53 | 2 | 4  | 12 | 10 | 45 |
| 711376 | conserved hypothetical protein-                                                  | 53 | 2 | 4  | 12 | 10 | 45 |
| 727946 | conserved hypothetical protein-                                                  | 53 | 2 | 4  | 12 | 10 | 45 |
| 788091 | glycosyl transferase 2 family protein-                                           | 53 | 2 | 4  | 12 | 10 | 45 |
| 235734 | conserved hypothetical protein-                                                  | 53 | 2 | 4  | 11 | 11 | 50 |
| 100804 | pseudaminic acid CMP-transferase-                                                | 53 | 2 | 4  | 10 | 12 | 55 |
| 100807 | pseudaminic acid synthase-                                                       | 53 | 2 | 4  | 10 | 12 | 55 |
| 255316 | pseudaminic acid synthase-                                                       | 53 | 2 | 4  | 10 | 12 | 55 |
| 511553 | pseudaminic acid synthase-                                                       | 53 | 2 | 4  | 10 | 12 | 55 |
| 662835 | UDP-N-acetylglucosamine 4,6-dehydratase-                                         | 53 | 2 | 4  | 10 | 12 | 55 |
| 674582 | pseudaminic acid CMP-transferase-                                                | 53 | 2 | 4  | 10 | 12 | 55 |
| 698803 | UDP-4-keto-6-deoxy-N-acetylglucosamine 4-aminotransferase-                       | 53 | 2 | 4  | 10 | 12 | 55 |
| 151    | #N/A                                                                             | 53 | 2 | 4  | 8  | 14 | 64 |
| 543513 | conserved hypothetical protein-                                                  | 53 | 2 | 4  | 8  | 14 | 64 |
| 663769 | conserved hypothetical protein-                                                  | 53 | 2 | 4  | 8  | 14 | 64 |
| 724742 | conserved hypothetical protein-                                                  | 53 | 2 | 4  | 8  | 14 | 64 |
| 200488 | nlpC/P60 family protein-                                                         | 52 | 3 | 5  | 13 | 9  | 41 |
| 201227 | universal stress family protein-                                                 | 52 | 3 | 5  | 13 | 9  | 41 |
| 410757 | nlpC/P60 family protein-                                                         | 52 | 3 | 5  | 13 | 9  | 41 |
| 514003 | bacteriophage lambda tail assembly I family protein-                             | 52 | 3 | 5  | 13 | 9  | 41 |
| 704184 | nlpC/P60 family protein-                                                         | 52 | 3 | 5  | 13 | 9  | 41 |
| 791454 | nlpC/P60 family protein-                                                         | 52 | 3 | 5  | 13 | 9  | 41 |
| 98817  | nlpC/P60 family protein-                                                         | 52 | 3 | 5  | 13 | 9  | 41 |
| 372781 | phosphoglucomutase/phosphomannomutase, alpha/beta/alpha domain I family protein- | 52 | 3 | 5  | 12 | 10 | 45 |
| 388070 | phage minor tail protein L-                                                      | 52 | 3 | 5  | 12 | 10 | 45 |
| 404115 | bacteriophage lambda tail assembly I family protein-                             | 52 | 3 | 5  | 12 | 10 | 45 |
| 410758 | phage minor tail protein L-                                                      | 52 | 3 | 5  | 12 | 10 | 45 |
| 483984 | bacteriophage lambda tail assembly I family protein-                             | 52 | 3 | 5  | 12 | 10 | 45 |
| 642776 | dihydropteroate synthase-                                                        | 52 | 3 | 5  | 12 | 10 | 45 |
| 747552 | bacteriophage lambda tail assembly I family protein-                             | 52 | 3 | 5  | 12 | 10 | 45 |
| 801010 | nlpC/P60 family protein-                                                         | 52 | 3 | 5  | 12 | 10 | 45 |
| 122348 | putative membrane protein-                                                       | 52 | 3 | 5  | 9  | 13 | 59 |
| 453135 | putative membrane protein-                                                       | 52 | 3 | 5  | 9  | 13 | 59 |
| 490718 | putative membrane protein-                                                       | 52 | 3 | 5  | 9  | 13 | 59 |
| 490719 | lysis S family protein-                                                          | 52 | 3 | 5  | 9  | 13 | 59 |
| 663766 | lysis S family protein-                                                          | 52 | 3 | 5  | 9  | 13 | 59 |
| 725145 | lysis S family protein-                                                          | 52 | 3 | 5  | 9  | 13 | 59 |
| 727930 | putative membrane protein-                                                       | 52 | 3 | 5  | 9  | 13 | 59 |
| 512522 | tetracycline repressor protein class B from transposon Tn10-                     | 51 | 4 | 7  | 12 | 10 | 45 |
| 64897  | conserved hypothetical protein-                                                  | 51 | 4 | 7  | 12 | 10 | 45 |
| 674089 | tetracycline resistance protein, class B-                                        | 51 | 4 | 7  | 12 | 10 | 45 |
| 657245 | MULE transposase domain protein-                                                 | 51 | 4 | 7  | 11 | 11 | 50 |
| 716954 | transposase, Mutator family protein-                                             | 51 | 4 | 7  | 11 | 11 | 50 |
| 712177 | prepilin-type N-terminal cleavage/methylation domain protein-                    | 50 | 5 | 9  | 11 | 11 | 50 |
| 716953 | MULE transposase domain protein-                                                 | 50 | 5 | 9  | 11 | 11 | 50 |
| 748933 | O-antigen ligase like membrane family protein-                                   | 50 | 5 | 9  | 7  | 15 | 68 |
| 351947 | conserved hypothetical protein-                                                  | 47 | 8 | 15 | 10 | 12 | 55 |
| 107479 | repressor protein-                                                               | 47 | 8 | 15 | 9  | 13 | 59 |
| 407514 | conserved hypothetical protein-                                                  | 47 | 8 | 15 | 5  | 17 | 77 |
| 418777 | conserved hypothetical protein-                                                  | 47 | 8 | 15 | 5  | 17 | 77 |
| 477799 | conserved hypothetical protein-                                                  | 47 | 8 | 15 | 5  | 17 | 77 |
| 107480 | sugar (and other) transporter family protein-                                    | 46 | 9 | 16 | 9  | 13 | 59 |
| 107485 | outer membrane porin, OprD family protein-                                       | 46 | 9 | 16 | 9  | 13 | 59 |
| 132697 | sugar (and other) transporter family protein-                                    | 46 | 9 | 16 | 9  | 13 | 59 |
| 132707 | acyl-CoA dehydrogenase, N-terminal domain protein-                               | 46 | 9 | 16 | 9  | 13 | 59 |

|        |                                                         |    |    |    |   |    |    |
|--------|---------------------------------------------------------|----|----|----|---|----|----|
| 147226 | rieske [2Fe-2S] domain protein-                         | 46 | 9  | 16 | 9 | 13 | 59 |
| 154138 | conserved hypothetical protein-                         | 46 | 9  | 16 | 9 | 13 | 59 |
| 164836 | sugar (and other) transporter family protein-           | 46 | 9  | 16 | 9 | 13 | 59 |
| 312686 | methyltransferase, TIGR00027 family protein-            | 46 | 9  | 16 | 9 | 13 | 59 |
| 324013 | FCD domain protein-                                     | 46 | 9  | 16 | 9 | 13 | 59 |
| 382129 | conserved hypothetical protein-                         | 46 | 9  | 16 | 9 | 13 | 59 |
| 389619 | FAD dependent oxidoreductase family protein-            | 46 | 9  | 16 | 9 | 13 | 59 |
| 389623 | helix-turn-helix domain protein-                        | 46 | 9  | 16 | 9 | 13 | 59 |
| 407645 | flavin-binding monooxygenase-like family protein-       | 46 | 9  | 16 | 9 | 13 | 59 |
| 536636 | aldehyde dehydrogenase family protein-                  | 46 | 9  | 16 | 9 | 13 | 59 |
| 536664 | conserved hypothetical protein-                         | 46 | 9  | 16 | 9 | 13 | 59 |
| 557110 | multidrug resistance efflux transporter family protein- | 46 | 9  | 16 | 9 | 13 | 59 |
| 591857 | AMP-binding enzyme family protein-                      | 46 | 9  | 16 | 9 | 13 | 59 |
| 625155 | putative membrane protein-                              | 46 | 9  | 16 | 9 | 13 | 59 |
| 626526 | hydroxycinnamoyl-CoA hydratase-lyase-                   | 46 | 9  | 16 | 9 | 13 | 59 |
| 626527 | acyl-CoA reductase family protein-                      | 46 | 9  | 16 | 9 | 13 | 59 |
| 667494 | NADH(P)-binding family protein-                         | 46 | 9  | 16 | 9 | 13 | 59 |
| 685475 | outer membrane porin, OprD family protein-              | 46 | 9  | 16 | 9 | 13 | 59 |
| 685478 | 2Fe-2S iron-sulfur cluster binding domain protein-      | 46 | 9  | 16 | 9 | 13 | 59 |
| 685489 | conserved hypothetical protein-                         | 46 | 9  | 16 | 9 | 13 | 59 |
| 685490 | alpha/beta hydrolase family protein-                    | 46 | 9  | 16 | 9 | 13 | 59 |
| 688197 | arginine N-succinyltransferase-                         | 46 | 9  | 16 | 9 | 13 | 59 |
| 698851 | putative membrane protein-                              | 46 | 9  | 16 | 9 | 13 | 59 |
| 339381 | tonB dependent receptor family protein-                 | 42 | 13 | 24 | 1 | 21 | 95 |
| 399160 | tonB dependent receptor family protein-                 | 42 | 13 | 24 | 1 | 21 | 95 |
| 476321 | tonB dependent receptor family protein-                 | 42 | 13 | 24 | 1 | 21 | 95 |
| 607112 | tonB dependent receptor family protein-                 | 42 | 13 | 24 | 1 | 21 | 95 |
| 335053 | nucleotide sugar dehydrogenase family protein-          | 37 | 18 | 33 | 4 | 18 | 82 |
| 581489 | nucleotide sugar dehydrogenase family protein-          | 37 | 18 | 33 | 4 | 18 | 82 |
| 598811 | nucleotide sugar dehydrogenase family protein-          | 37 | 18 | 33 | 4 | 18 | 82 |
| 630567 | nucleotide sugar dehydrogenase family protein-          | 37 | 18 | 33 | 4 | 18 | 82 |
| 266446 | conserved hypothetical protein-                         | 36 | 19 | 35 | 3 | 19 | 86 |
| 643724 | conserved hypothetical protein-                         | 36 | 19 | 35 | 3 | 19 | 86 |
| 107602 | conserved hypothetical protein-                         | 36 | 19 | 35 | 2 | 20 | 91 |
| 341412 | conserved hypothetical protein-                         | 36 | 19 | 35 | 2 | 20 | 91 |
| 80562  | conserved hypothetical protein-                         | 36 | 19 | 35 | 2 | 20 | 91 |
| 99145  | conserved hypothetical protein-                         | 36 | 19 | 35 | 2 | 20 | 91 |
| 627942 | methyltransferase domain protein-                       | 35 | 20 | 36 | 3 | 19 | 86 |
| 696839 | bacterial regulatory, tetR family protein-              | 35 | 20 | 36 | 3 | 19 | 86 |
| 351821 | glutamine amidotransferase class-I family protein-      | 35 | 20 | 36 | 2 | 20 | 91 |
| 337738 | hypothetical protein-                                   | 35 | 20 | 36 | 1 | 21 | 95 |
| 496027 | conserved hypothetical protein-                         | 35 | 20 | 36 | 1 | 21 | 95 |
| 715203 | conserved hypothetical family protein-                  | 35 | 20 | 36 | 1 | 21 | 95 |
| 661537 | conserved hypothetical protein-                         | 30 | 25 | 45 | 2 | 20 | 91 |



**Supplemental Table 13. Centroids unique to *A. baumannii* cluster C**

| <b>Centroid ID</b> | <b>Annotation</b>                                                       |
|--------------------|-------------------------------------------------------------------------|
| 578869             | conserved hypothetical protein-                                         |
| 298565             | putative domain protein-                                                |
| 580357             | BAAT / Acyl-CoA thioester hydrolase C terminal family protein-          |
| 580358             | rieske [2Fe-2S] domain protein-                                         |
| 498357             | winged helix-turn-helix DNA-binding family protein-                     |
| 579868             | hypothetical protein-                                                   |
| 121674             | conserved hypothetical protein-                                         |
| 214632             | hypothetical protein-                                                   |
| 120531             | fumarylacetoacetate (FAA) hydrolase family protein-                     |
| 215965             | T5orf172 domain protein-                                                |
| 120870             | conserved hypothetical protein-                                         |
| 752869             | conserved hypothetical protein-                                         |
| 753735             | exonuclease, DNA polymerase III, epsilon subunit family domain protein- |
| 753744             | cyclase family protein-                                                 |
| 146886             | metA-pathway of phenol degradation family protein-                      |
| 215942             | hypothetical protein-                                                   |
| 753954             | conserved hypothetical protein-                                         |
| 297834             | conserved hypothetical protein-                                         |
| 751263             | conserved hypothetical protein-                                         |
| 580619             | conserved hypothetical protein-                                         |
| 498513             | conserved hypothetical protein-                                         |
| 754226             | putative lipoprotein-                                                   |
| 497761             | conserved hypothetical protein-                                         |
| 585692             | conserved hypothetical protein-                                         |
| 754243             | hypothetical protein-                                                   |
| 576892             | hypothetical protein-                                                   |
| 751731             | conserved hypothetical protein-                                         |
| 203760             | glyoxalase/Bleomycin resistance /Dioxygenase superfamily protein-       |
| 215947             | hypothetical protein-                                                   |
| 752872             | RHS repeat-associated core domain protein-                              |
| 176251             | hypothetical protein-                                                   |
| 146882             | pyridine nucleotide-disulfide oxidoreductase family protein-            |

**Centroid unique to *A. baumannii* cluster e**

|        |                                 |
|--------|---------------------------------|
| 470823 | conserved hypothetical protein- |
|--------|---------------------------------|

Supplemental Table 14. Summary of absence/presence of OXA genes

| Isolate ID | Imipenem resistance status | OXA-23-like | OXA-24/40-like | OXA-58-like | OXA-143-like | OXA-51-like |
|------------|----------------------------|-------------|----------------|-------------|--------------|-------------|
| 1297       | R                          | +           | -              | -           | -            | +           |
| 2887       | R                          | -           | -              | -           | -            | +           |
| 3390       | S                          | -           | -              | -           | -            | +           |
| 4749       | S                          | -           | -              | -           | -            | +           |
| 6935       | R                          | -           | -              | -           | -            | +           |
| 7893       | R                          | -           | -              | -           | -            | +           |
| 10519      | R                          | -           | -              | -           | -            | +           |
| 11126      | S                          | -           | -              | -           | -            | +           |
| 14216      | R                          | -           | +              | -           | +            | +           |
| 15827      | R                          | +           | -              | -           | -            | +           |
| 17534      | R                          | -           | -              | -           | -            | +           |
| 18689      | R                          | -           | -              | -           | -            | +           |
| 21072      | S                          | -           | -              | -           | -            | +           |
| 23037      | R                          | +           | -              | -           | -            | +           |
| 23671      | R                          | -           | -              | -           | -            | +           |
| 29280      | R                          | +           | -              | -           | -            | +           |
| 34001      | R                          | +           | -              | -           | -            | +           |
| 34654      | S                          | -           | -              | -           | -            | +           |
| 42887      | R                          | +           | -              | -           | -            | +           |
| 43926      | R                          | +           | -              | -           | -            | +           |
| 50595      | S                          | -           | -              | -           | -            | +           |
| 58452      | R                          | -           | -              | -           | -            | +           |
| 70136      | S                          | -           | -              | -           | -            | +           |
| 73736      | R                          | +           | -              | -           | -            | +           |
| 83444      | S                          | -           | -              | -           | -            | +           |
| 96512      | R                          | +           | -              | -           | -            | +           |
| 98826      | S                          | -           | -              | -           | -            | +           |
| 99063      | S                          | -           | -              | -           | -            | +           |
| 110912     | R                          | -           | +              | -           | +            | +           |
| 118362     | S                          | -           | -              | -           | -            | +           |
| 121738     | S                          | -           | -              | -           | -            | +           |
| 135867     | R                          | +           | -              | -           | -            | +           |
| 136706     | R                          | +           | -              | -           | -            | +           |
| 144107     | S                          | -           | -              | -           | -            | +           |
| 145660     | S                          | -           | -              | -           | -            | +           |
| 213697     | R                          | +           | -              | -           | -            | +           |
| 214216     | R                          | -           | -              | -           | -            | +           |
| 232184     | S                          | -           | -              | -           | -            | +           |
| 233846     | S                          | -           | -              | -           | -            | +           |
| 268680     | S                          | -           | -              | -           | -            | +           |
| 273929     | R                          | -           | -              | -           | -            | +           |
| 277047     | S                          | -           | -              | -           | -            | +           |
| 299505     | S                          | -           | -              | -           | -            | +           |
| 303002     | R                          | +           | -              | -           | -            | +           |
| 318814     | S                          | -           | -              | -           | -            | +           |
| 323408     | S                          | -           | -              | -           | -            | +           |

|        |   |   |   |   |   |   |
|--------|---|---|---|---|---|---|
| 339786 | S | - | - | - | - | + |
| 342950 | S | - | - | - | - | + |
| 397971 | R | - | - | - | - | + |
| 400834 | R | + | - | - | - | + |
| 426863 | S | - | - | - | - | + |
| 457946 | R | - | - | - | - | + |
| 458282 | R | + | - | - | - | + |
| 466215 | R | + | - | - | - | + |
| 466760 | S | - | - | - | - | + |
| 470922 | R | + | - | - | - | + |
| 480175 | R | - | - | - | - | + |
| 496487 | R | - | - | - | - | + |
| 532279 | S | - | - | - | - | + |
| 532413 | R | - | - | - | - | + |
| 541915 | S | - | - | - | - | + |
| 554515 | S | - | - | - | - | + |
| 562700 | R | + | - | - | - | + |
| 564012 | R | - | - | - | - | + |
| 607805 | S | - | - | - | - | + |
| 625974 | S | - | - | - | - | + |
| 628418 | R | - | - | - | - | + |
| 647609 | R | + | - | - | - | + |
| 653020 | I | - | - | - | - | + |
| 655378 | S | - | - | - | - | + |
| 655555 | R | + | - | - | - | + |
| 722310 | R | - | - | - | - | + |
| 724909 | R | + | - | - | - | + |
| 730795 | I | - | - | - | - | + |
| 737393 | R | + | - | - | - | + |
| 754286 | R | - | - | - | - | + |
| 755829 | R | - | - | - | - | + |
| 756476 | R | - | - | - | - | + |
| 781407 | S | - | - | - | - | + |
| 825610 | S | + | - | - | - | + |
| 831240 | S | - | - | - | - | + |
| 836190 | R | + | - | - | - | + |
| 846928 | S | - | - | - | - | + |
| 855125 | S | - | - | - | - | + |
| 916567 | R | - | - | - | - | + |
| 923118 | R | + | - | - | - | + |
| 940793 | R | - | - | - | - | + |
| 942133 | R | - | - | - | - | + |
| 942194 | R | - | - | - | - | + |
| 947299 | R | + | - | - | - | + |
| 951631 | R | - | + | - | + | + |
| 959073 | R | + | - | - | - | + |
| 972082 | S | - | + | - | - | + |
| 981176 | R | - | - | - | - | + |
| 984213 | S | - | - | - | - | + |
| 987421 | R | + | + | - | + | + |

|         |   |   |   |   |   |   |
|---------|---|---|---|---|---|---|
| 993520  | R | + | - | - | - | + |
| 1007214 | S | - | - | - | - | + |
| 1022959 | R | - | - | - | - | + |
| 1031433 | R | + | - | - | - | + |
| 1032241 | R | - | - | - | - | + |
| 1032359 | R | - | - | - | - | + |
| 1035119 | S | - | - | - | - | + |
| 1036938 | R | - | - | - | - | + |
| 1039621 | R | + | - | - | - | + |
| 1040094 | S | + | - | - | - | + |
| 1043794 | R | - | - | - | - | + |
| 1043903 | R | + | - | - | - | + |
| 1045092 | R | + | - | - | - | + |
| 1046051 | R | - | - | - | - | + |
| 1046674 | R | - | - | - | - | + |
| 1051176 | S | - | - | - | - | + |
| 1051830 | R | + | - | - | - | + |
| 1058283 | R | - | - | - | - | + |
| 1062314 | R | - | - | - | - | + |
| 1075025 | R | + | - | - | - | + |
| 1095464 | R | + | - | - | - | + |
| 1096934 | S | - | - | - | - | + |
| 1106579 | S | - | - | - | - | + |
| 1117819 | R | - | - | - | - | + |
| 1121032 | R | + | - | - | - | + |
| 1146103 | R | - | - | - | - | + |
| 1159076 | R | + | - | - | - | + |
| 1170863 | R | - | - | - | - | + |
| 1178044 | R | + | - | - | - | + |
| 1188188 | R | - | - | - | - | + |
| 1202252 | R | - | - | - | - | + |
| 1207552 | R | - | - | - | - | + |
| 1232509 | R | - | - | - | - | + |
| 1237202 | R | + | - | - | - | + |
| 1237893 | R | - | - | - | - | + |
| 1247182 | R | - | - | - | - | + |
| 1264936 | R | + | - | - | - | + |
| 1266220 | R | - | - | - | - | + |
| 1267820 | S | - | - | - | - | + |
| 1271213 | R | - | - | - | - | + |
| 1271651 | R | + | - | - | - | + |
| 1277411 | S | - | - | - | - | + |
| 1284800 | R | + | - | - | - | + |
| 1287985 | R | + | - | - | - | + |
| 1289546 | R | - | - | - | - | + |
| 1291820 | S | - | - | - | - | + |
| 1293320 | S | - | - | - | - | + |
| 1294217 | R | + | - | - | - | + |
| 1294222 | R | - | - | - | - | + |
| 1295549 | S | - | - | - | - | + |

|              |   |   |   |   |   |   |
|--------------|---|---|---|---|---|---|
| 1295743      | S | - | - | - | - | + |
| 1296252      | R | + | - | - | - | + |
| 1297549      | S | - | - | - | - | + |
| 1391434      | S | - | - | - | - | + |
| 1392509      | R | - | - | - | - | + |
| 1397084      | R | + | - | - | - | + |
| 1397513      | R | - | - | - | - | + |
| 1406182      | R | + | - | - | - | + |
| 1406589      | R | - | - | - | - | + |
| 1406750      | R | + | - | - | - | + |
| 1412924      | S | - | - | - | - | + |
| 1413735      | R | - | + | - | + | + |
| 1417041      | S | - | - | - | - | + |
| 1419130      | S | - | - | - | - | - |
| 1426993      | R | + | - | - | - | + |
| 1428368      | S | - | - | - | - | + |
| 1429530      | S | - | - | - | - | + |
| 1440422      | S | - | - | - | - | + |
| 1440750      | R | - | - | - | - | + |
| 1457504      | R | - | - | - | - | + |
| 1461963      | S | - | - | - | - | + |
| 1462234      | R | - | - | - | - | + |
| 1465485      | R | + | - | - | - | - |
| 1471012      | R | + | - | - | - | + |
| 1475764      | R | - | - | - | - | + |
| 1482820      | R | - | - | - | - | + |
| 1488685      | S | - | - | - | - | + |
| 1494580      | R | + | - | - | - | + |
| 1499986      | R | - | - | - | - | + |
| 1505311      | R | + | - | - | - | + |
| 1525283      | S | - | - | - | - | + |
| 1526966      | R | - | - | - | - | + |
| 1533268      | R | - | - | - | - | + |
| 1539026      | R | + | - | - | - | + |
| 1546444      | S | - | - | - | - | + |
| 1552389      | S | - | - | - | - | + |
| 1552818      | R | + | - | - | - | + |
| 1552865      | S | - | - | - | - | + |
| 1575710      | R | + | - | - | - | + |
| 1593273      | R | + | - | - | - | + |
| 1598530      | S | - | - | - | - | + |
| 1042969_1197 | S | - | - | - | - | + |
| 1042969_1265 | R | - | - | - | - | - |
| 1064293_45   | S | - | - | - | - | + |
| 1064293_46   | R | - | - | - | - | + |
| 1195185_11   | S | - | - | - | - | + |
| 1195185_80   | R | - | + | - | + | + |
| 1262761_105  | S | - | - | - | - | + |
| 1262761_97   | R | - | - | - | - | + |
| 1276470_132  | I | - | - | - | - | + |

|             |   |   |   |   |   |   |
|-------------|---|---|---|---|---|---|
| 1276470_86  | R | - | - | - | - | + |
| 472237_1196 | S | - | - | - | - | + |
| 472237_120  | R | - | - | - | - | + |
| 662545_1347 | S | - | - | - | - | + |
| 796380_2102 | R | + | - | - | - | + |
| 929679_2095 | R | + | - | - | - | + |
| 929679_598  | S | - | - | - | - | + |

---

---
